# Supplementary material for: Effects of Paraquat, Dextran Sulfate Sodium, and Irradiation on Behavioral and Cognitive Performance and the Gut Microbiome in A53T and A53T-L444P Mice
Source: MDPI journal article supplement (doi:10.3390/genes15030282), 2024-02-23
Supplement: s1 [file s1]

## Supplementary Materials

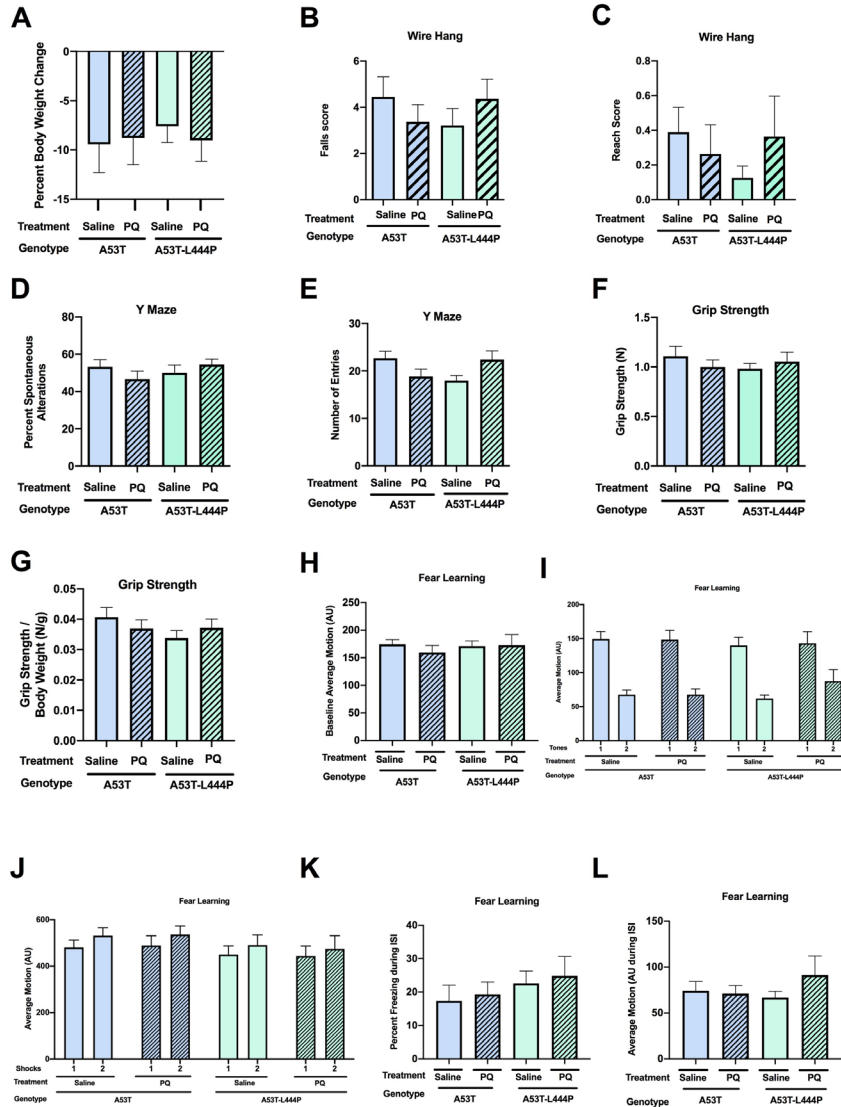

**Figure S1. A.** There was no effect of genotype or treatment on the percent body weight change. **B.** There was no effect of genotype or treatment on fall scores in the wire hang test. **C.** There was no effect of genotype or treatment on reach scores in the wire hang test. **D.** In the grip strength test, there was no effect of genotype or treatment. **E.** When grip strength per body weight was analyzed, there was no effect of genotype or treatment.

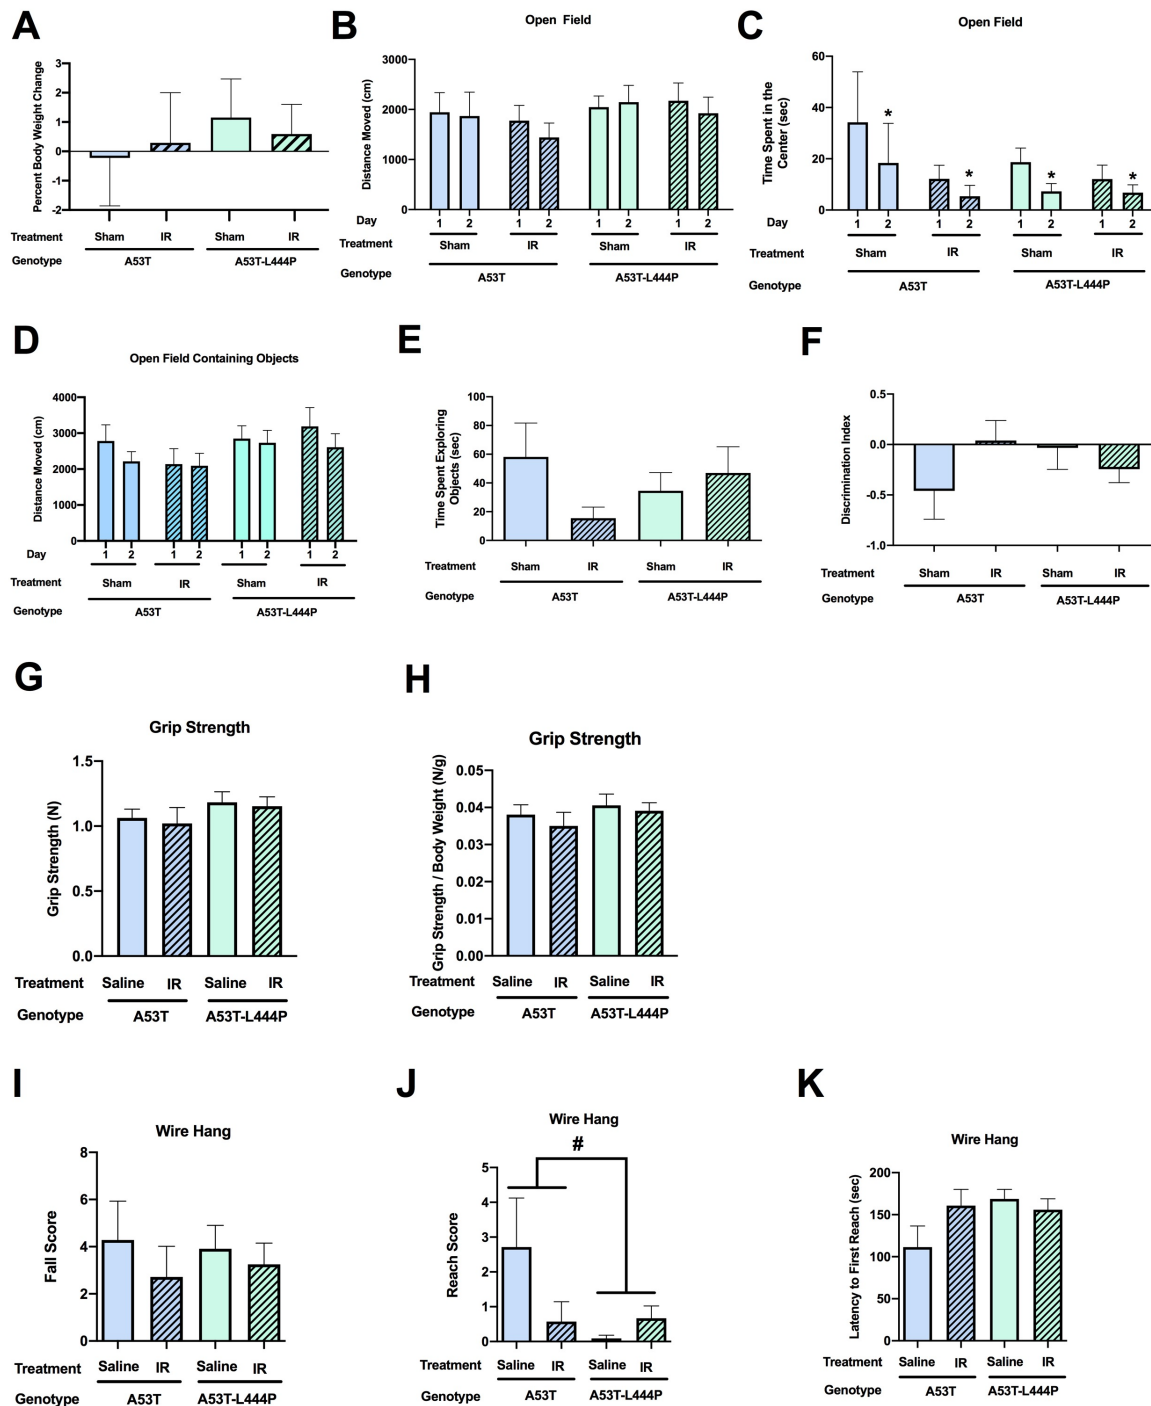

**Figure S2. A.** There was no effect of genotype or treatment on the percent body weight change. **B.** There was no effect of genotype or treatment on activity levels during open field testing. **C.** When time spent in the center of the open field was analyzed, there was an effect of day ( $F(1,29) = 6.309$ ,  $*p = 0.018$ ). **D.** There was no effect of genotype or treatment on

activity levels in the open field containing objects. **E.** There was no effect of genotype or treatment on time spent exploring the objects in the object recognition test. **F.** There was no effect of genotype or treatment on the discrimination index in the object recognition test. **G.** There was no effect of genotype or treatment on grip strength. **H.** There was no effect of genotype or treatment on grip strength per body weight. **I.** There was no effect of genotype or treatment on fall scores in the wire hang test. **J.** There was a trend towards an effect of genotype for reach scores ( $F(1,29) = 3.271$ ,  $^{\#}p = 0.081$ ), with a trend towards higher reach scores in A53T than A53T-L444P mice. **K.** There was a no effect of genotype or treatment on latency to first reach in the wire hang test.

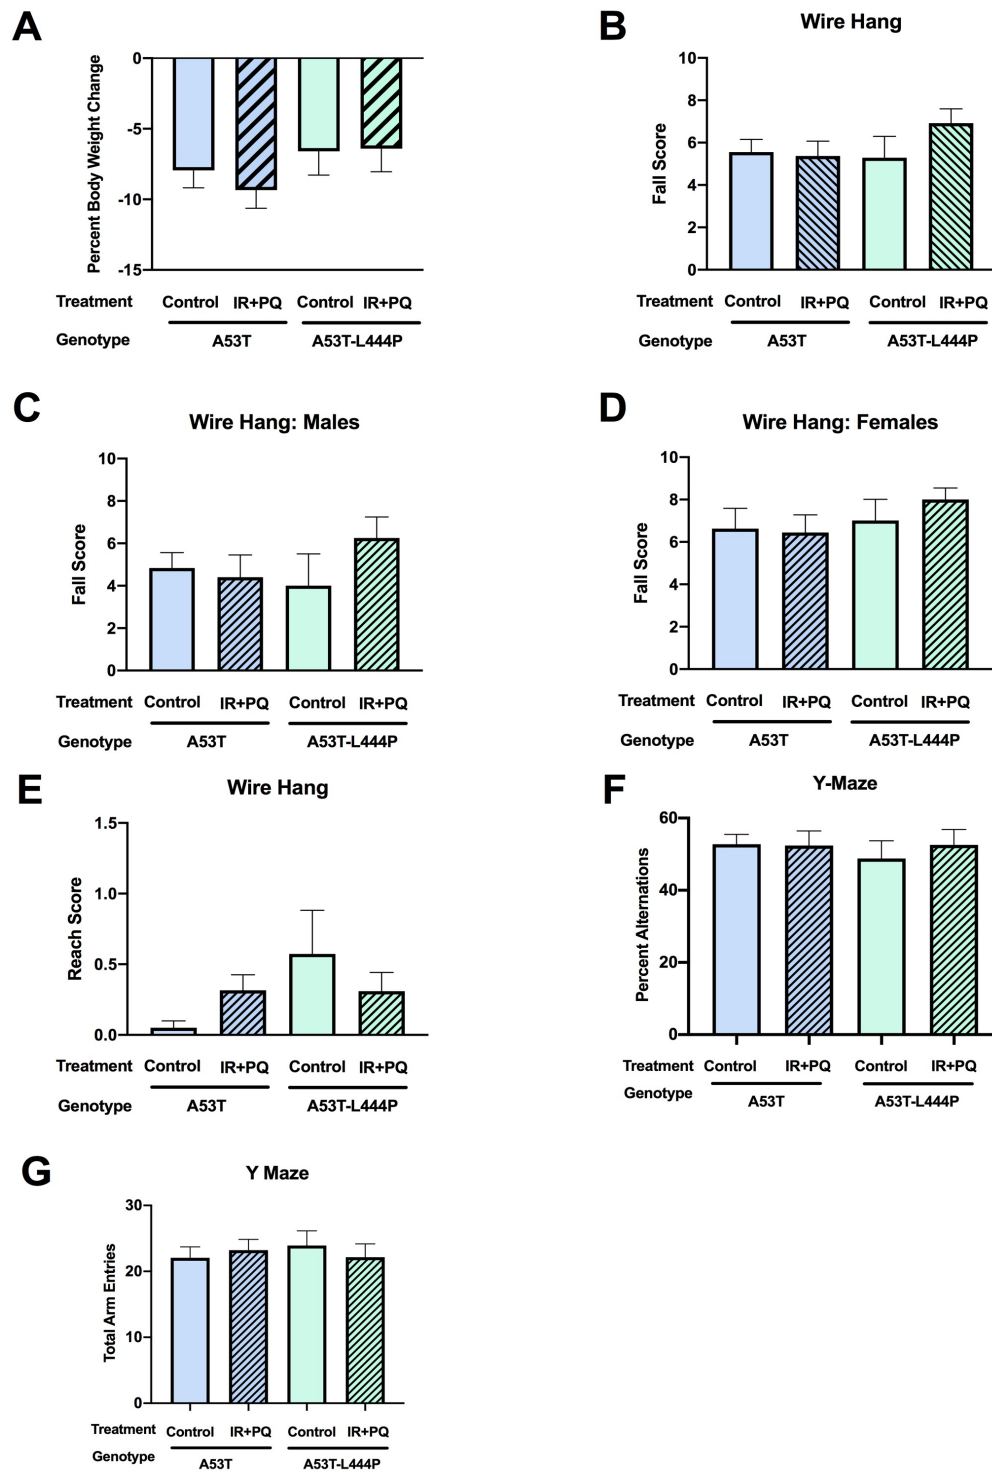

**Figure S3.A.** There was no effect of genotype or treatment on the percent body weight change. **B.** There was an effect of sex for fall scores in the wire hang test ( $F(1,58) = 8.345$ ,  $p = 0.005$ ). **C.** Fall scores in males. **D.** Fall score in females were higher than those in males (C).

E. For reach scores, there was a trend towards a treatment x sex x genotype interaction

( $F(1,58) = 3.248$ ,  $p = 0.077$ ). F. There was no effect of genotype or treatment on spontaneous alternation in the Y maze. There was no effect of genotype or treatment for the number of entries in the Y maze ( $F(1,58) = 3.949$ ,  $p = 0.052$ ).

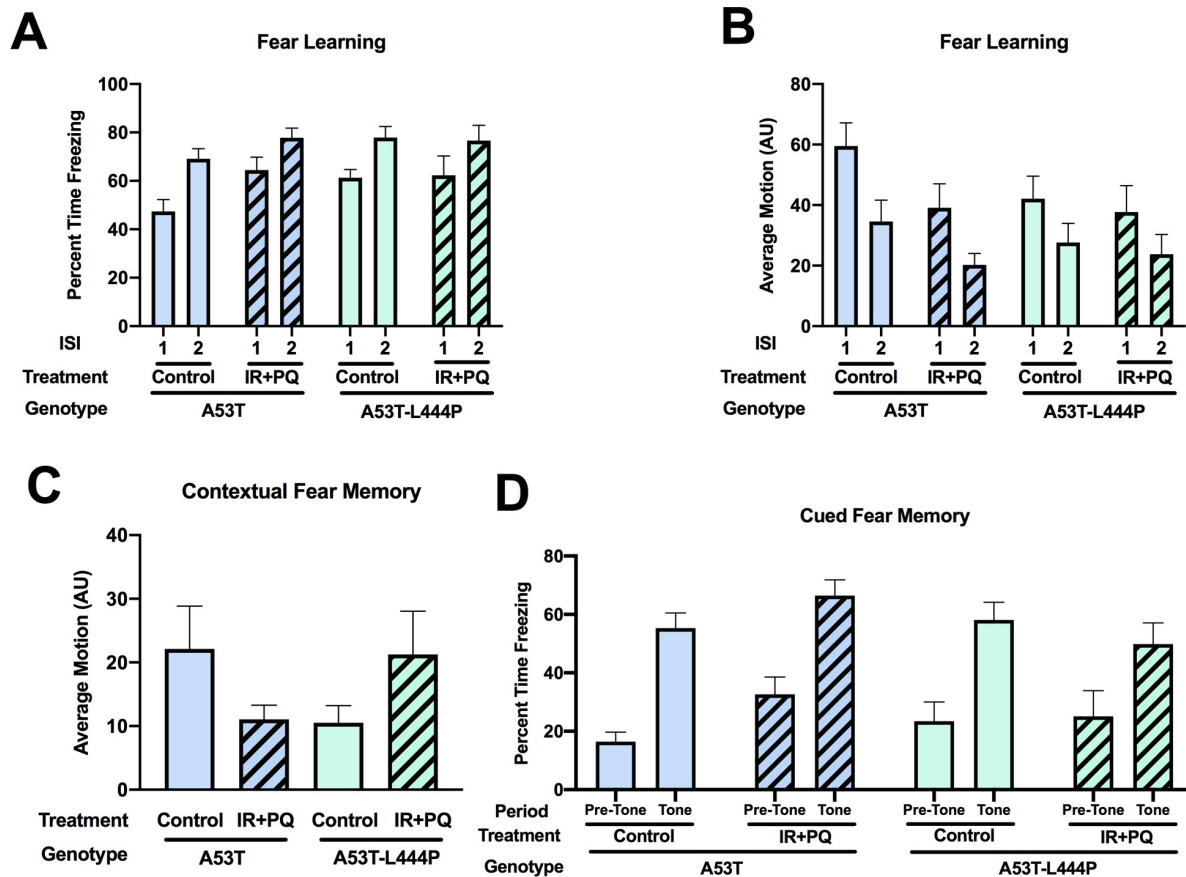

**Figure S4.** A. There was no effect of genotype or treatment on freezing levels during the ISIs. B. There was no effect of genotype or treatment on activity levels during the ISIs. C. There was no effect of genotype or treatment on activity levels during the contextual fear memory test. D. There was no effect of genotype or treatment on freezing levels during the cued fear memory test.

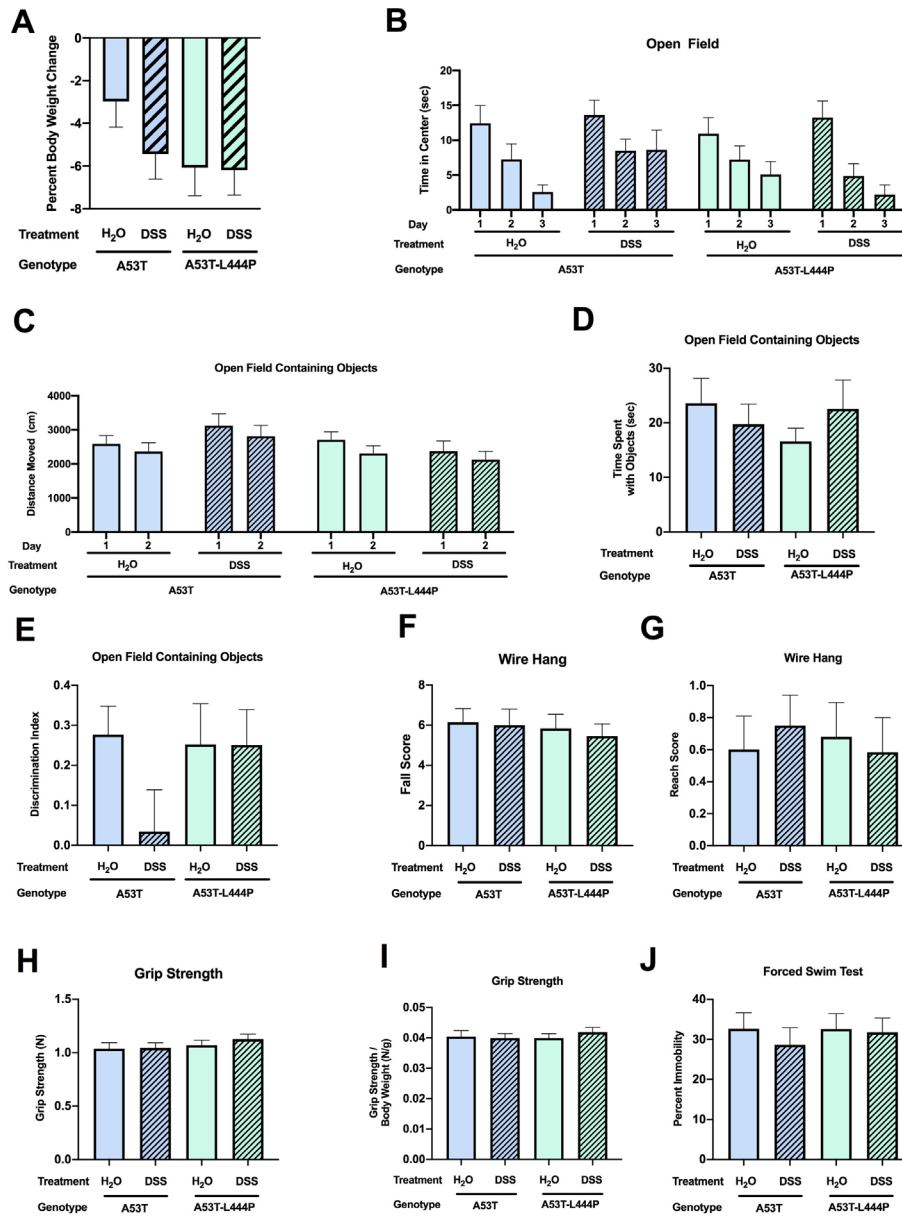

**Figure S5. A.** There was no effect of genotype or treatment on the percent body weight change. **B.** There was no effect of genotype or treatment on anxiety levels in the open field. **C.** There was no effect of genotype or treatment on activity levels in the open field containing objects. **D.** There was no effect of genotype or treatment on time spent exploring the objects in the object recognition test. **E.** There was no effect of genotype or treatment on the discrimination index. **F.** There was no effect of genotype or treatment on fall scores in

the wire hang test. **G.** There was no effect of genotype or treatment on reach scores in the wire hang test. **H.** There were no effects of genotype or treatment on performance in grip strength test. **I.** There was no effect of genotype, treatment on grip strength per body weight. **J.** There were no effects of genotype or treatment on depressive-like behavior in the forced swim test.

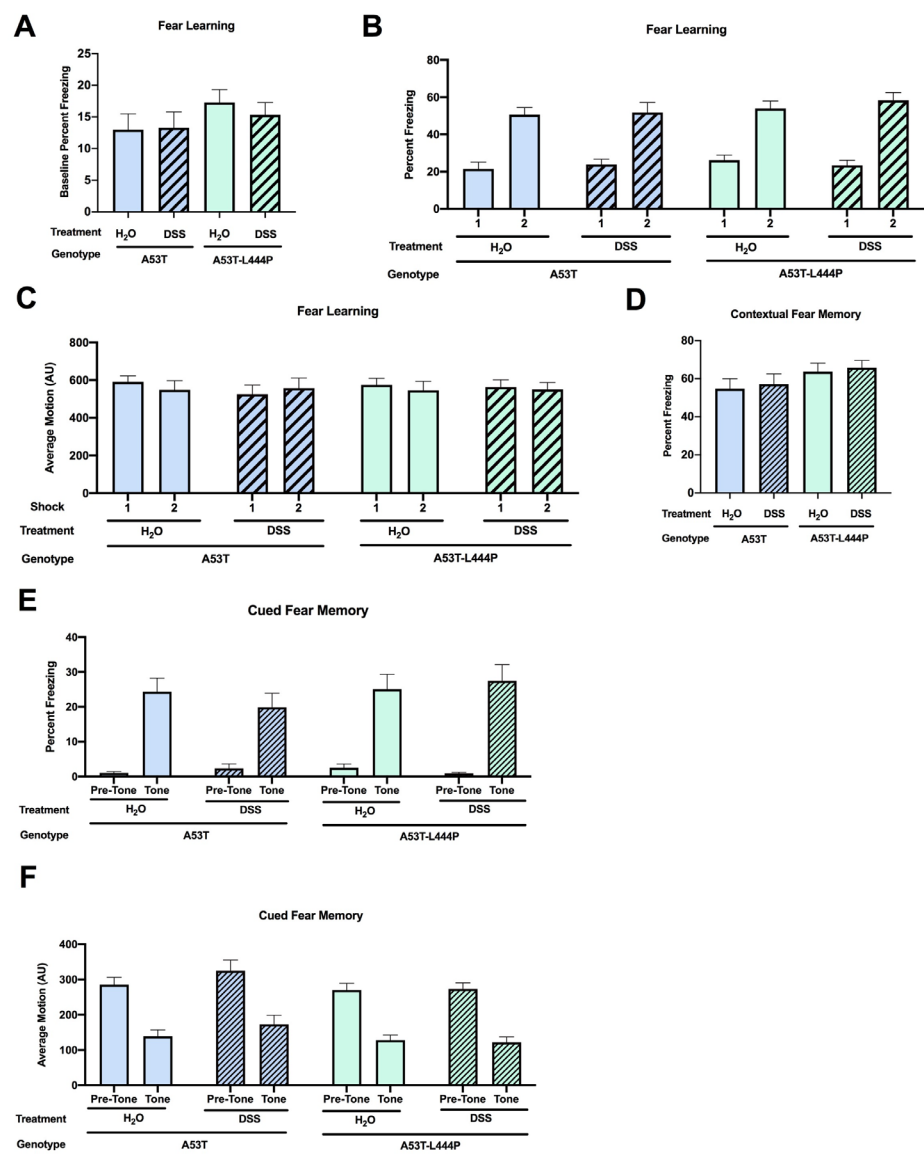

**Figure S6. A.** There were no effects of genotype or treatment on percent freezing during the baseline period in the fear conditioning test. **B.** There was no effect of genotype or treatment

on freezing during the tones. **C.** There was no effect of genotype or treatment on response to the shocks. **D.** There was no effect of genotype or treatment on freezing levels during the contextual fear memory test. **E.** There was no effect of genotype or treatment on freezing levels during the cued fear memory test. **F.** There was no effect of genotype or treatment on activity levels during the cued fear memory test.

**Table S1.** PQ\_sample\_data.

|         | Ki<br>ng<br>do<br>m | Phyl<br>um | Class      | Order          | Family          | Genus                   | Taxon                                                                                                                                                                                                                                                                        |
|---------|---------------------|------------|------------|----------------|-----------------|-------------------------|------------------------------------------------------------------------------------------------------------------------------------------------------------------------------------------------------------------------------------------------------------------------------|
| ASV015A | Bacteri             | Firmicutes | Clostridia | Lachnospirales | Lachnospiraceae | Lachnospiraceae_Genus   | TACGTATGGAGCAAGCGTTATCCGGATTTACTGGGTGTAAAGGGAGCGCAGACGGCAGGGCAAGTCTGATG<br>TGAAAGTCCGGGGCTCAACCCCGGGACTGCATTGGAAACTGTCCGGCTAGAGTGCAGGAGAGGTAAGTGGA<br>ATTCTAGTGTAGCGGTGAAATGCGTAGATATTAGGAGGAACACCAGTGGCGAAGGCGGCTTACTGGACTGT<br>AACTGACGTTGAGGCTCGAAAGCGTGCGGAGCAAAACAGG    |
| ASV360A | Bacteri             | Firmicutes | Clostridia | Lachnospirales | Lachnospiraceae | Lachnospiraceae_Genus   | TACGTAGGGGGCAAGCGTTATCCGGATTTACTGGGTGTAAAGGGAGCGTAGACGGTATGGTAAGTCAGATGT<br>GAAAGCCCCGGGGCTTAACCCCGGAACTGCATTGAAACTATCAAAGTGTAGAGTGTCCGAGAGGTAAGTGGA<br>TTCCTAGTGTAGCGGTGAAATGCGTAGATATTAGGAGGAACACCAGTGGCGAAGGCGGCTTACTGGACGAT<br>AACTGACGTTGAGGCTCGAAAGCGTGCGGAGCAAAACAGG  |
| ASV098A | Bacteri             | Firmicutes | Clostridia | Lachnospirales | Lachnospiraceae | Lachnospiraceae_Genus   | TACGTATGGTGCAAGCGTTATCCGGAATGACTGGGTGTAAAGGGAGCGTAGACGGTTGTACAAGTCTGATGT<br>GAAAGCCCACGGCTCAACTGTGGGAGTGCATTGGAAACTGTAGAAGTGTAGAGTATCGGAGAGGCAAGTGGA<br>TTCCTAGTGTAGCGGTGAAATGCGTAGATATTAGGAGGAACACCAGTGGCGAAGGCGGCTTGTCTGGACGAA<br>AACTGACGTTGAGGCTCGAAAGCGTGCGGAGCAAAACAGG |
| ASV286A | Bacteri             | Firmicutes | Clostridia | Lachnospirales | Lachnospiraceae | XBB1006                 | TACGTAGGGGGCAAGCGTTATCCGGATTTACTGGGTGTAAAGGGAGCGCAGGCGGCAGGATGAGTCTGATG<br>TGAAAACCCGCGGCTCAACCACGGGATTGCATTGGAAACTGTCCAGCTAGAGTGTCCGAGAGGTAAGCGGA<br>ATTCTAGTGTAGCGGTGAAATGCGTAGATATTAGGAGGAACACCAGTGGCGAAGGCGGCTTACTGGACGA<br>TGACTGACGCTGAGGCTCGAAAGCGTGCGGAGCAAAACAGG    |
| ASV571A | Bacteri             | Firmicutes | Clostridia | Lachnospirales | Lachnospiraceae | Lachnospiraceae_Genus   | TACGTAGGGGGCAAGCGTTATCCGGATTTACTGGGTGTAGAGGGAGCGCAGGCGGCAGGATGAGTCTGATG<br>TGAAAACCCGCGGCTCAACCACGGGATTGCATTGGAAACTGTAGAAGTGTAGAGTATCGGAGAGGCAAGTGGA<br>ATTCTAGTGTAGCGGTGAAATGCGTAGATATTAGGAGGAACACCAGTGGCGAAGGCGGCTTGTCTGGACGA<br>AAACTGACGTTGAGGCTCGAAAGCGTGCGGAGCAAAACAGG |
| ASV069A | Bacteri             | Firmicutes | Clostridia | Lachnospirales | Lachnospiraceae | Lachnospiraceae_Genus   | TACGTAGGGGGCAAGCGTTATCCGGATTTACTGGGTGTAAAGGGAGCGTAGACGGCCATGCAAGTCTGATGT<br>GAAAACCCGGGGCTCAACCCCGGGACTGCATTGAAACTGTGCGGCTGGAGTGTCCGAGAGGCAAGTGGA<br>TTCCTAGTGTAGCGGTGAAATGCGTAGATATTAGGAGGAACACCAGTGGCGAAGGCGGCTTGTCTGGACGAC<br>GACTGACGTTGAGGCTCGAAAGCGTGCGGAGCAAAACAGG    |
| ASV069A | Bacteri             | Firmicutes | Clostridia | Lachnospirales | Lachnospiraceae | Lachnospiraceae_UCG-006 | TACGTATGGTGCAAGCGTTATCCGGATTTACTGGGTGTAAAGGGAGCGTAGACGGCTGTGCAAGTCTGAAGT<br>GAAAGGCCGGGGCCCAACCCCGGGAGTGTCTTGGAAACTGTGCGGCTAGAGTGTCCGAGAGGCAAGTGGA<br>ATTCCAGTGTAGCGGTGAAATGCGTAGATATTGGGAGGAACACCAGTGGCGAAGGCGTCTTGTCTGGACGA<br>TGACTGACGTTGAGGCTCGAAAGCGTGCGGAGCAAAACAGG   |

|    |     |       |        |         |           |              |                                                                           |
|----|-----|-------|--------|---------|-----------|--------------|---------------------------------------------------------------------------|
| 18 |     |       |        |         |           |              |                                                                           |
| 8  |     |       |        |         |           |              |                                                                           |
| A  |     |       |        |         |           |              |                                                                           |
| S  | Ba  |       |        |         |           |              | TACGTAGGGGGCAAGCGTTATCCGGATTTACTGGGTGTAAAGGGAGCGTAGACGGCTGTGCAAGTCTGGAGT  |
| V  | ct  | Firm  |        |         |           |              | GAAAGGCATGGGGCTCAACCTGTGGACTGCTTTGGAAACTGTGCGGCTTGAGTGTGCGAGAGGGCAAGTGGAA |
| 11 | eri | icute | Clostr | Lachnos | Lachnospi |              | TTCCTAGTGTAGCGGTGAAATGCGTAGATATTAGGAGGAACACCAGTGGCGAAGGCGGCTTGCTGGACGAT   |
| 4  | a   | s     | idia   | pirales | raceae    | Dorea        | GACTGACGTTGAGGCTCGAAAGCGTGCGGGAGCAAACAGG                                  |
| A  |     |       |        |         |           |              |                                                                           |
| S  | Ba  |       |        |         |           |              | TACGTAGGGGGCAAGCGTTATCCGGATTTACTGGGTGTAAAGGGAGCGTAGACGGCAGTGCAAGTCTGAAG   |
| V  | ct  | Firm  |        |         |           | Lachnospira  | TGAAAGGCAAGGGCTCAACCCCTGGACTGCTTTGGAAACTGTGCTGCTGGAGTGTGCGAGAGGGCAAGTGGAA |
| 21 | eri | icute | Clostr | Lachnos | Lachnospi | ceae_UCG-    | ATTCCTAGTGTAGCGGTGAAATGCGTAGATATTAGGAGGAACACCAGTGGCGAAGGCGGCTTGCTGGACGA   |
| 5  | a   | s     | idia   | pirales | raceae    | 006          | TGACTGACGTTGAGGCTCGAAAGCGTGCGGGAGCAAACAGG                                 |
| A  |     |       |        |         |           |              |                                                                           |
| S  | Ba  |       |        |         |           |              | TACGTAGGGGGCAAGCGTTATCCGGATTTACTGGGTGTAAAGGGAGCGTAGACGGCGATGCAAGCCAGATG   |
| V  | ct  | Firm  |        |         |           |              | TGAAAGCCCGGGGCTCAACCCCGGGACTGCATTTGGAAGTGTGTGGCTGGAGTGTGCGAGAGGGCAAGTGGAA |
| 32 | eri | icute | Clostr | Lachnos | Lachnospi | Lachnoclostr | ATTCCTAGTGTAGCGGTGAAATGCGTAGATATTAGGAGGAACACCAGTGGCGAAGGCGGCTTGCTGGACGA   |
| 6  | a   | s     | idia   | pirales | raceae    | idium        | TGACTGACGTTGAGGCTCGAAAGCGTGCGGGAGCAAACAGG                                 |
| A  |     |       |        |         |           |              |                                                                           |
| S  | Ba  |       |        |         |           |              | TACGTAGGGGGCAAGCGTTATCCGGATTTACTGGGTGTAAAGGGAGCGTAGACGGCTTTGCAAGCCAGATGT  |
| V  | ct  | Firm  |        |         |           |              | GAAAGCCCGGGGCTCAACCTCGGGACTGCATTTGGAAGTGTATGGCTGGAGTGTGCGAGAGGGCAGGCGGAA  |
| 37 | eri | icute | Clostr | Lachnos | Lachnospi | Lachnospira  | TTCCTAGTGTAGCGGTGAAATGCGTAGATATTAGGAGGAACACCAGTGGCGAAGGCGGCTTGCTGGACGAT   |
| 9  | a   | s     | idia   | pirales | raceae    | ceae_Genus   | GACTGACGTTGAGGCTCGAAAGCGTGCGGGAGCAAACAGG                                  |
| A  |     |       |        |         |           |              |                                                                           |
| S  | Ba  |       |        |         |           |              | TACGTAGGGGGCAAGCGTTATCCGGATTTACTGGGTGTAAAGGGAGCGTAGACGGCGGTGCAAGCCAGATG   |
| V  | ct  | Firm  |        |         |           |              | TGAAAGCCCGGGGCTCAACCCCGGGACTGCATTTGGAAGTGTATGGCTGGAGTGTGCGAGAGGGCAGGCGGA  |
| 24 | eri | icute | Clostr | Lachnos | Lachnospi | Lachnoclostr | ATTCCTAGTGTAGCGGTGAAATGCGTAGATATTAGGAGGAACACCAGTGGCGAAGGCGGCTTGCTGGACGA   |
| 5  | a   | s     | idia   | pirales | raceae    | idium        | TGACTGACGTTGAGGCTCGAAAGCGTGCGGGAGCAAACAGG                                 |
| A  |     |       |        |         |           |              |                                                                           |
| S  | Ba  |       |        |         |           |              | TACGTAGGGGGCAAGCGTTATCCGGATTTACTGGGTGTAAAGGGAGCGTAGACGGCGGTGCAAGCCAGATG   |
| V  | ct  | Firm  |        |         |           |              | TGAAAGCCCGGGGCTCAACCCCGGGACTGCATTTGGAAGTGTATAGCTAGAGTGTGCGAGAGGGCAGGCGGA  |
| 12 | eri | icute | Clostr | Lachnos | Lachnospi | Lachnoclostr | ATTCCTAGTGTAGCGGTGAAATGCGTAGATATTAGGAGGAACACCAGTGGCGAAGGCGGCTTGCTGGACGA   |
| 4  | a   | s     | idia   | pirales | raceae    | idium        | TGACTGACGTTGAGGCTCGAAAGCGTGCGGGAGCAAACAGG                                 |
| A  |     |       |        |         |           |              |                                                                           |
| S  | Ba  |       |        |         |           |              | TACGTAGGGGGCAAGCGTTATCCGGATTTACTGGGTGTAAAGGGAGCGTAGACGGCGGTGCAAGCCAGATG   |
| V  | ct  | Firm  |        |         |           |              | TGAAAGCCCGGGGCTCAACCCCGGGACTGCATTTGGAAGTGTATGGCTAGAGTGTGCGAGAGGGCAGGCGGA  |
| 29 | eri | icute | Clostr | Lachnos | Lachnospi | Lachnoclostr | ATTCCTAGTGTAGCGGTGAAATGCGTAGATATTAGGAGGAACACCAGTGGCGAAGGCGGCTTGCTGGACGA   |
| 5  | a   | s     | idia   | pirales | raceae    | idium        | TGACTGACGTTGAGGCTCGAAAGCGTGCGGGAGCAAACAGG                                 |
| A  |     |       |        |         |           |              |                                                                           |
| S  | Ba  |       |        |         |           |              | TACGTAGGGGGCAAGCGTTATCCGGATTTACTGGGTGTAAAGGGAGCGTAGACGGCCATTCAAGCCAGATG   |
| V  | ct  | Firm  |        |         |           |              | TGAAAGCCCGGGGCTCAACCCCGGGACTGCATTTGGAAGTGTATGGCTGGAGTGTGCGAGAGGGCAGGCGGA  |
| 35 | eri | icute | Clostr | Lachnos | Lachnospi | Lachnoclostr | ATTCCTAGTGTAGCGGTGAAATGCGTAGATATTAGGAGGAACACCAGTGGCGAAGGCGGCTTGCTGGACGA   |
| 4  | a   | s     | idia   | pirales | raceae    | idium        | TGACTGACGTTGAGGCTCGAAAGCGTGCGGGAGCAAACAGG                                 |

|    |     |       |        |         |           |              |             |                                                                           |
|----|-----|-------|--------|---------|-----------|--------------|-------------|---------------------------------------------------------------------------|
| A  | S   | Ba    |        |         |           |              |             | TACGTAGGGGGCAAGCGTTATCCGGATTTACTGGGTGTAAAGGGAGCGTAGACGGTCTGCAAGCCAGATGT   |
|    | V   | ct    | Firm   |         |           |              |             | GAAAGCCCCGGGGCTCAACCCCGGGACTGCATTTGGAAGTGTAAAGGCTAGAGTGTGCGAGAGGCAGGCGGAA |
| 25 | eri | icute | Clostr | Lachnos | Lachnospi | Lachnoclostr |             | TTCCTAGTGTAGCGGTGAAATGCGTAGATATTAGGAGGAACACCAGTGGCGAAGGCGGCCTGCTGGACGAT   |
| 4  | a   | s     | idia   | pirales | raceae    | idium        |             | GACTGACGTTGAGGCTCGAAAGCGTGGGGAGCAAACAGG                                   |
| A  | S   | Ba    |        |         |           |              |             | TACGTAGGGGGCAAGCGTTATCCGGATTTACTGGGTGTAAAGGGAGCGTAGACGGCTTTGCAAGCCAGATGT  |
|    | V   | ct    | Firm   |         |           |              |             | GAAAGCCCCGGGGCTCAACCCCGGGACTGCATTTGGAAGTGTGTGGCTAGAGTGTGCGAGAGGCAGGCGGAA  |
| 35 | eri | icute | Clostr | Lachnos | Lachnospi | Lachnospira  |             | TTCCTAGTGTAGCGGTGAAATGCGTAGATATTAGGAGGAACACCAGTGGCGAAGGCGGCCTGCTGGACGAT   |
| 2  | a   | s     | idia   | pirales | raceae    | ceae_Genus   |             | GACTGACGTTGAGGCTCGAAAGCGTGGGGAGCAAACAGG                                   |
| A  | S   | Ba    |        |         |           |              |             | TACGTAGGGGGCAAGCGTTATCCGGATTTACTGGGTGTAAAGGGAGCGTAGACGGCGGTGCAAGCCAGATG   |
|    | V   | ct    | Firm   |         |           |              |             | TGAAAGCCCCGGGGCTCAACCCCGGGACTGCATTTGGAAGTGTGTGCTAGAGTGTGCGAGAGGCAGGCGGA   |
| 08 | eri | icute | Clostr | Lachnos | Lachnospi | Lachnoclostr |             | ATTCCTAGTGTAGCGGTGAAATGCGTAGATATTAGGAGGAACACCAGTGGCGAAGGCGGCCTGCTGGACGA   |
| 3  | a   | s     | idia   | pirales | raceae    | idium        |             | TGACTGACGTTGAGGCTCGAAAGCGTGGGGAGCAAACAGG                                  |
| A  | S   | Ba    |        |         |           |              |             | TACGTAGGGGGCAAGCGTTATCCGGATTTACTGGGTGTAAAGGGAGCGTAGACGGCGGCGCAAGCCAGATG   |
|    | V   | ct    | Firm   |         |           |              |             | TGAAAGCCCCGGGGCTCAACCCCGGGACTGCATTTGGAAGTGTGTGCTAGAGTGTGCGAGAGGCAGGCGGA   |
| 28 | eri | icute | Clostr | Lachnos | Lachnospi | Lachnoclostr |             | ATTCCTAGTGTAGCGGTGAAATGCGTAGATATTAGGAGGAACACCAGTGGCGAAGGCGGCCTGCTGGACGA   |
| 9  | a   | s     | idia   | pirales | raceae    | idium        |             | TGACTGACGTTGAGGCTCGAAAGCGTGGGGAGCAAACAGG                                  |
| A  | S   | Ba    |        |         |           |              |             | TACGTAGGGGGCAAGCGTTATCCGGATTTACTGGGTGTAAAGGGAGCGTAGACGGCTTGCAAGCCAGATG    |
|    | V   | ct    | Firm   |         |           |              |             | TGAAAGGCTGGGGCTCAACCCAGGACTGCATTTGGAAGTGTATGCTAGAGTGTGCGAGAGGCAGGCGGA     |
| 08 | eri | icute | Clostr | Lachnos | Lachnospi | Lachnoclostr |             | ATTCCTAGTGTAGCGGTGAAATGCGTAGATATTAGGAGGAACACCAGTGGCGAAGGCGGCCTGCTGGACGA   |
| 8  | a   | s     | idia   | pirales | raceae    | idium        |             | TGACTGACGTTGAGGCTCGAAAGCGTGGGGAGCAAACAGG                                  |
| A  | S   | Ba    |        |         |           |              |             | TACGTAGGGGGCAAGCGTTATCCGGATTTACTGGGTGTAAAGGGAGCGTAGACGGCTGTGCAAGCCAGATG   |
|    | V   | ct    | Firm   |         |           |              |             | TGAAAGCCCCGGGGCTCAACCCCGGGACTGCATTTGGAAGTGTGTGGCTGGAGTGTGCGAGAGGCAGGCGGA  |
| 18 | eri | icute | Clostr | Lachnos | Lachnospi | Lachnoclostr |             | ATTCCTAGTGTAGCGGTGAAATGCGTAGATATTAGGAGGAACACCAGTGGCGAAGGCGGCCTGCTGGACGA   |
| 1  | a   | s     | idia   | pirales | raceae    | idium        |             | TGACTGACGTTGAGGCTCGAAAGCGTGGGGAGCAAACAGG                                  |
| A  | S   | Ba    |        |         |           |              |             | TACGTAGGGGGCAAGCGTTATCCGGATTTACTGGGTGTAAAGGGAGCGTAGACGGCAATGCAAGCCAGATG   |
|    | V   | ct    | Firm   |         |           |              |             | TGAAAGCCCCGGGGCTCAACCCCGGGACTGCATTTGGAAGTGTGTAGCTGGAGTGTGCGAGAGGCAGGCGGA  |
| 15 | eri | icute | Clostr | Lachnos | Lachnospi | Lachnoclostr |             | ATTCCTAGTGTAGCGGTGAAATGCGTAGATATTAGGAGGAACACCAGTGGCGAAGGCGGCCTGCTGGACGA   |
| 6  | a   | s     | idia   | pirales | raceae    | idium        |             | TGACTGACGTTGAGGCTCGAAAGCGTGGGGAGCAAACAGG                                  |
| A  | S   | Ba    |        |         |           |              |             | TACGTAGGGGGCAAGCGTTATCCGGATTTACTGGGTGTAAAGGGAGCGTAGACGGCTGTGCAAGCCAGATG   |
|    | V   | ct    | Firm   |         |           |              |             | TGAAAGCCCCGGGGCTCAACCCCGGGACTGCATTTGGAAGTGTGTAGCTGGAGTGTGCGAGAGGCAGGCGGA  |
| 32 | eri | icute | Clostr | Lachnos | Lachnospi | Lachnoclostr |             | ATTCCTAGTGTAGCGGTGAAATGCGTAGATATTAGGAGGAACACCAGTGGCGAAGGCGGCCTGCTGGACGA   |
| 0  | a   | s     | idia   | pirales | raceae    | idium        |             | TGACTGACGTTGAGGCTCGAAAGCGTGGGGAGCAAACAGG                                  |
| A  | ct  | Firm  |        |         |           |              |             | TACGTAGGGGGCAAGCGTTATCCGGATTTACTGGGTGTAAAGGGAGCGTAGACGGCATGGCAAGTCTGATGT  |
|    | S   | eri   | icute  | Clostr  | Lachnos   | Lachnospi    | Lachnospira | GAAAAACCCGGGGCTCAACCCCGGGACTGCATTGGAAGTGTGAGGCTAGAGTGTGCGAGAGGCAAGTGGA    |
| V  | a   | s     | idia   | pirales | raceae    | ceae_Genus   |             | ATTCCTAGTGTAGCGGTGAAATGCGTAGATATTAGGAGGAACACCAGTGGCGAAGGCGGCTTGTGGACGA    |
|    |     |       |        |         |           |              |             | TGACTGACGTTGAGGCTCGAAAGCGTGGGGAGCAAACAGG                                  |

|    |     |       |        |         |           |            |                                                                            |
|----|-----|-------|--------|---------|-----------|------------|----------------------------------------------------------------------------|
| 28 |     |       |        |         |           |            |                                                                            |
| 1  |     |       |        |         |           |            |                                                                            |
| A  |     |       |        |         |           |            |                                                                            |
| S  | Ba  |       |        |         |           |            | TACGTAGGGGGCAAGCGTTATCCGGATTTACTGGGTGTAAAGGGAGCGTAGACGGTATGGCAAGTCTGATGT   |
| V  | ct  | Firm  |        |         |           |            | GAAAACCCGGGGCTCAACCCCGGGACTGCATTGGAAACTGTCTGGACTAGAGTGTCTGGAGAGGCAAGTGGAA  |
| 10 | eri | icute | Clostr | Lachnos | Lachnospi |            | ATTCTAGTGTAGCGGTGAAATGCGTAGATATTAGGAGGAACACCAGTGGCGAAGGCGGCTTGCTGGACGA     |
| 6  | a   | s     | idia   | pirales | raceae    | Roseburia  | TGACTGACGTTGAGGCTCGAAAGCGTGGGGAGCAAACAGG                                   |
| A  |     |       |        |         |           |            |                                                                            |
| S  | Ba  |       |        |         |           |            | TACGTAGGGGGCAAGCGTTATCCGGATTTACTGGGTGTAAAGGGAGCGTAGACGGAATAGCAAGTCTGATG    |
| V  | ct  | Firm  |        |         |           |            | TGAAAACCCGGGGCTCAACTCCGGGAGTGCATTGGAAACTGTTGATCTAGAGTGTCTGGAGAGGCAAGCGGA   |
| 43 | eri | icute | Clostr | Lachnos | Lachnospi | Lachnospi  | ATTCTAGTGTAGCGGTGAAATGCGTAGATATTAGGAGGAACACCAGTGGCGAAGGCGGCTTGCTGGACGA     |
| 1  | a   | s     | idia   | pirales | raceae    | 006        | TGACTGACGTTGAGGCTCGAAAGCGTGGGGAGCAAACAGG                                   |
| A  |     |       |        |         |           |            |                                                                            |
| S  | Ba  |       |        |         |           |            | TACGTAGGGGGCAAGCGTTATCCGGATTTACTGGGTGTAAAGGGAGCGTAGACGGAATTGCAAGTCTGATGT   |
| V  | ct  | Firm  |        |         |           |            | GAAAATCCGGGGCCCAACCCCGGAACTGCATTGGAAACTGTATTTCTAGAGTGTCTGGAGAGGCAAGTGGAA   |
| 09 | eri | icute | Clostr | Lachnos | Lachnospi | Lachnospi  | TTCTGGTGTAGCGGTGAAATGCGTAGATATCAGGAGGAACACCAGTGGCGAAGGCGGCTTGCTGGACGAT     |
| 7  | a   | s     | idia   | pirales | raceae    | 006        | GACTGACGTTGAGGCTCGAAAGCGTGGGGAGCAAACAGG                                    |
| A  |     |       |        |         |           |            |                                                                            |
| S  | Ba  |       |        |         |           |            | TACGTAGGGGGCAAGCGTTATCCGGATTTACTGGGTGTAAAGGGAGCGTAGACGGATAAGCAAGTCTGATG    |
| V  | ct  | Firm  |        |         |           |            | TGAAAATCCGGGGCCCAACCCCGGAATTGCATTGGAAACTGCATATCTAGAGTGTCTGGAGAGGCAAGTGGAA  |
| 10 | eri | icute | Clostr | Lachnos | Lachnospi | Lachnospi  | ATTCTGGTGTAGCGGTGAAATGCGTAGATATCAGGAGGAACACCAGTGGCGAAGGCGGCTTGCTGGACGA     |
| 1  | a   | s     | idia   | pirales | raceae    | 006        | TGACTGACGTTGAGGCTCGAAAGCGTGGGGAGCAAACAGG                                   |
| A  |     |       |        |         |           |            |                                                                            |
| S  | Ba  |       |        |         |           |            | TACGTAGGGGGCAAGCGTTATCCGGATTTACTGGGTGTAAAGGGAGCGTAGACGGACTTGCAAGTCTGATGT   |
| V  | ct  | Firm  |        |         |           |            | GAAAATCCGGGGCCCAACCCCGGAACTGCATTGGAAACTGTATATCTAGAGTGTCTGGAGAGGCAAGTGGAA   |
| 14 | eri | icute | Clostr | Lachnos | Lachnospi | Lachnospi  | TTCTGGTGTAGCGGTGAAATGCGTAGATATCAGGAGGAACACCAGTGGCGAAGGCGGCTTGCTGGACGAT     |
| 2  | a   | s     | idia   | pirales | raceae    | 006        | GACTGACGTTGAGGCTCGAAAGCGTGGGGAGCAAACAGG                                    |
| A  |     |       |        |         |           |            |                                                                            |
| S  | Ba  |       |        |         |           |            | TACGTAGGGGGCAAGCGTTATCCGGATTTACTGGGTGTAAAGGGAGCGTAGACGGAGGAGCAAGTCTGAAG    |
| V  | ct  | Firm  |        |         |           |            | TGAAAGCCCGCGGCTCAACTGCGGGACTGCTTTGGAAACTGTTTCATCTAGAGTGTCTGGAGAGGTAAGTGGAA |
| 25 | eri | icute | Clostr | Lachnos | Lachnospi | Lachnospi  | TTCTAGTGTAGCGGTGAAATGCGTAGATATTAGGAGGAACACCAGTGGCGAAGGCGGCTTACTGGACGAT     |
| 8  | a   | s     | idia   | pirales | raceae    | ceae_Genus | GACTGACGTTGAGGCTCGAAAGCGTGGGGAGCAAACAGG                                    |
| A  |     |       |        |         |           |            |                                                                            |
| S  | Ba  |       |        |         |           |            | TACGTAGGGGGCAAGCGTTATCCGGATTTACTGGGTGTAAAGGGAGCGCAGGCGGCGCGGTAAGTCTGATG    |
| V  | ct  | Firm  |        |         |           |            | TGAAAGCCCGGGGCTCAACCCCGGGACTGCATTGGAAACTGTCTGTCTGGAGTGTCTGGAGGGGCAAGTGGAA  |
| 15 | eri | icute | Clostr | Lachnos | Lachnospi |            | ATTCTAGTGTAGCGGTGAAATGCGTAGATATTAGGAGGAACACCAGTGGCGAAGGCGGCTTGCTGGACGA     |
| 9  | a   | s     | idia   | pirales | raceae    | Roseburia  | CAACTGACGCTGAGGCTCGAAAGCGTGGGGAGCAAACAGG                                   |
| A  |     |       |        |         |           |            |                                                                            |
| S  | Ba  |       |        |         |           |            | TACGTAGGGGGCAAGCGTTATCCGGATTTACTGGGCGTAAAGGGAGCGCAGGCGGCGCGGCAAGTCTGATG    |
| V  | ct  | Firm  |        |         |           |            | TGAAAGCCCGGGGCTCAACCCCGGGTCTGCATTGGAAACTGTCTGAGCTAGAGTGTCTGGAGGGGTAAGCGGA  |
| 04 | eri | icute | Clostr | Lachnos | Lachnospi |            | ATTCTAGTGTAGCGGTGAAATGCGTAGATATTAGGAGGAACACCAGTGGCGAAGGCGGCTTACTGGACGA     |
| 5  | a   | s     | idia   | pirales | raceae    | Roseburia  | TGACTGACGCTGAGGCTCGAAAGCGTGGGGAGCAAACAGG                                   |

|    |     |       |        |         |           |           |  |                                                                          |
|----|-----|-------|--------|---------|-----------|-----------|--|--------------------------------------------------------------------------|
| A  | S   | Ba    |        |         |           |           |  | TACGTAGGGGGCAAGCGTTATCCGGATTCACTGGGCGTAAAGGGAGCGCAGGCGGGCGGGCAAGTCTGATG  |
|    | V   | ct    | Firm   |         |           |           |  | TGAAAGCTCGGGGCTCAACCCCGGGTCTGCATTGAAAAGTGTGAGCTAGAGTGTGCGAGGGGTAAGCGGA   |
| 30 | eri | icute | Clostr | Lachnos | Lachnospi |           |  | ATTCCTAGTGTAGCGGTGAAATGCGTAGATATTAGGAGGAACACCAGTGGCGAAGGCGGCTTACTGGACGA  |
| 9  | a   | s     | idia   | pirales | raceae    | Roseburia |  | TGACTGACGCTGAGGCTCGAAAGCGTGGGGAGCAAACAGG                                 |
| A  | S   | Ba    |        |         |           |           |  | TACGTAGGGGGCAAGCGTTATCCGGATTCACTGGGCGTAAAGGGAGCGCAGGCGGGCACGGCAAGTCTGGTG |
|    | V   | ct    | Firm   |         |           |           |  | TGAAAACCCGGGGCTCAACCCCGGGACTGCATTGAAAAGTGTGCGGGCTGGAGTGTGCGAGGGGTAAGCGGA |
| 02 | eri | icute | Clostr | Lachnos | Lachnospi |           |  | ATTCCTAGTGTAGCGGTGAAATGCGTAGATATTAGGAGGAACACCAGTGGCGAAGGCGGCTTACTGGACGA  |
| 4  | a   | s     | idia   | pirales | raceae    | Roseburia |  | TGACTGACGCTGAGGCTCGAAAGCGTGGGGAGCAAACAGG                                 |
| A  | S   | Ba    |        |         |           |           |  | TACGTAGGGGGCGAGCGTTATCCGGATTCACTGGGCGTAAAGGGAGCGCAGGCGGGCACGGCAAGTCCGGTG |
|    | V   | ct    | Firm   |         |           |           |  | TGAAAGCCCGGGGCCAACCCCGGGACTGCACTGAAAAGTGTGCGGGCTGGAGTGTGCGAGGGGCAGGCGG   |
| 02 | eri | icute | Clostr | Lachnos | Lachnospi |           |  | AATTCCTAGTGTAGCGGTGAAATGCGTAGATATTAGGAGGAACACCAGTGGCGAAGGCGGCTGCTGGACG   |
| 7  | a   | s     | idia   | pirales | raceae    | Roseburia |  | ACGACTGACGCTGAGGCTCGAAAGCGTGGGGAGCAAACAGG                                |
| A  | S   | Ba    |        |         |           |           |  | TACGTATGGGGCAAGCGTTATCCGGATTTACTGGGTGTAAAGGGAGCGCAGGCGGCCTGCCAAGTCTGGTGT |
|    | V   | ct    | Firm   |         |           |           |  | GAAAACCCGGGGCCCAACCCCGGGCTGCATTGAAAAGTGTGCGGGCTGGAGTGTGCGAGGGGCAGGCGGA   |
| 07 | eri | icute | Clostr | Lachnos | Lachnospi |           |  | ATTCCTAGTGTAGCGGTGAAATGCGTAGATATTAGGAGGAACACCAGTGGCGAAGGCGGCCTGCTGGACGA  |
| 3  | a   | s     | idia   | pirales | raceae    | Roseburia |  | TGACTGACGCTGAGGCTCGAAAGCGTGGGGAGCAAACAGG                                 |
| A  | S   | Ba    |        |         |           |           |  | TACGTATGGAGCAAGCGTTATCCGGATTTACTGGGTGTAAAGGGAGCGCAGGCGGTCTGGCAAGTCTGATGT |
|    | V   | ct    | Firm   |         |           |           |  | GAAAGGCCGGGGCTCAACTCCGGGACTGCATTGAAAAGTGTGAGACTGGAGTGTGCGAGAGGTAAGCGGAA  |
| 12 | eri | icute | Clostr | Lachnos | Lachnospi |           |  | TTCCTAGTGTAGCGGTGAAATGCGTAGATATTAGGAGGAACACCAGTGGCGAAGGCGGCTTACTGGACGAT  |
| 8  | a   | s     | idia   | pirales | raceae    | Roseburia |  | GACTGACGCTGAGGCTCGAAAGCGTGGGGAGCAAACAGG                                  |
| A  | S   | Ba    |        |         |           |           |  | TACGTATGGAGCAAGCGTTATCCGGATTTACTGGGTGTAAAGGGAGCGCAGGCGGTCTGGCAAGTCTGATGT |
|    | V   | ct    | Firm   |         |           |           |  | GAAAGGCCGGGGCTCAACCCCGGGACTGCATTGAAAAGTGTGAGACTGGAGTGTGCGAGAGGTAAGCGGA   |
| 16 | eri | icute | Clostr | Lachnos | Lachnospi |           |  | ATTCCTAGTGTAGCGGTGAAATGCGTAGATATTAGGAGGAACACCAGTGGCGAAGGCGGCTTACTGGACGA  |
| 4  | a   | s     | idia   | pirales | raceae    | Roseburia |  | TGACTGACGCTGAGGCTCGAAAGCGTGGGGAGCAAACAGG                                 |
| A  | S   | Ba    |        |         |           |           |  | TACGTATGGAGCAAGCGTTATCCGGATTTACTGGGTGTAAAGGGAGCGCAGGCGGTCTGGCAAGTCTGGTGT |
|    | V   | ct    | Firm   |         |           |           |  | GAAAGGCCGGGGCTCAACCCCGGGACTGCATTGAAAAGTGTGAGACTGGAGTGTGCGAGAGGCAAGCGGA   |
| 02 | eri | icute | Clostr | Lachnos | Lachnospi |           |  | ATTCCTAGTGTAGCGGTGAAATGCGTAGATATTAGGAGGAACACCAGTGGCGAAGGCGGCTTACTGGACGA  |
| 8  | a   | s     | idia   | pirales | raceae    | Roseburia |  | TGACTGACGCTGAGGCTCGAAAGCGTGGGGAGCAAACAGG                                 |
| A  | S   | Ba    |        |         |           |           |  | TACGTATGGAGCAAGCGTTATCCGGATTTACTGGGTGTAAAGGGAGCGTAGGCGGTAAGGCAAGTCTGATGT |
|    | V   | ct    | Firm   |         |           |           |  | GAAAGGCCAGGGCTCAACCCCTGGGACTGCATTGAAAAGTGTGAGACTGGAGTGTGCGAGAGGCAAGTGAA  |
| 09 | eri | icute | Clostr | Lachnos | Lachnospi |           |  | TTCCTAGTGTAGCGGTGAAATGCGTAGATATTAGGAGGAACACCAGTGGCGAAGGCGGCTTACTGGACGAT  |
|    | a   | s     | idia   | pirales | raceae    | Roseburia |  | GACTGACGCTGAGGCTCGAAAGCGTGGGGAGCAAACAGG                                  |
| A  | Ba  |       |        |         |           |           |  | TACGTATGGGGCAAGCGTTATCCGGATTTACTGGGTGTAAAGGGAGCGCAGGCGGCTTGGCAAGTCTGATGT |
|    | ct  | Firm  |        |         |           |           |  | GAAAGGCTGGGGCTCAACCCAGGACTGCATTGAAAAGTGTGAGGCTGGAGTGTGCGAGAGGTAAGCGGAA   |
| S  | eri | icute | Clostr | Lachnos | Lachnospi |           |  | TTCCTAGTGTAGCGGTGAAATGCGTAGATATTAGGAGGAACACCAGTGGCGAAGGCGGCTTACTGGACGAC  |
| V  | a   | s     | idia   | pirales | raceae    | Roseburia |  | AAGTGTGACGCTGAGGCTCGAAAGCGTGGGGAGCAAACAGG                                |

|    |     |       |        |         |           |             |  |                                                                           |
|----|-----|-------|--------|---------|-----------|-------------|--|---------------------------------------------------------------------------|
| 19 |     |       |        |         |           |             |  |                                                                           |
| 7  |     |       |        |         |           |             |  |                                                                           |
| A  |     |       |        |         |           |             |  |                                                                           |
| S  | Ba  |       |        |         |           |             |  | TACGTATGGTGCAAGCGTTATCCGGATTTACTGGGCGTAAAGGGAGCGCAGGCGGGCGGCCAAGTCTGATGT  |
| V  | ct  | Firm  |        |         |           |             |  | GAAACCCCGGGGCTCAACCCCGGGCATGCATTGAAACTGGCGGGCTGGAGTGCCGGAGAGGTAAGCGGA     |
| 09 | eri | icute | Clostr | Lachnos | Lachnospi |             |  | ATTCCTAGTGTAGCGGTGAAATGCGTAGATATTAGGAGGAACACCAGTGCGCAAGGCGGCTTACTGGACGG   |
| 1  | a   | s     | idia   | pirales | raceae    | Roseburia   |  | CAACTGACGCTGAGGCTCGAAAGCGTGGGGAGCAAACAGG                                  |
| A  |     |       |        |         |           |             |  |                                                                           |
| S  | Ba  |       |        |         |           |             |  | TACGTATGGTGCAAGCGTTATCCGGATTTACTGGGTGTAAAGGGAGCGCAGGCGGGCGGCTTAAGTCTGATGT |
| V  | ct  | Firm  |        |         |           |             |  | GAAAACCCCGGGGCTCAACTGCGGGACTGCATTGAAACTGGCGGGCTTGAGTGCCGGAGAGGCAAGCGGA    |
| 25 | eri | icute | Clostr | Lachnos | Lachnospi |             |  | ATTCCTAGTGTAGCGGTGAAATGCGTAGATATTAGGAGGAACACCAGTGCGCAAGGCGGCTTGCTGGACGG   |
| 2  | a   | s     | idia   | pirales | raceae    | Roseburia   |  | TAACTGACGCTGAGGCTCGAAAGCGTGGGGAGCAAACAGG                                  |
| A  |     |       |        |         |           |             |  |                                                                           |
| S  | Ba  |       |        |         |           |             |  | TACGTATGGTGCAAGCGTTATCCGGATTTACTGGGTGTAAAGGGAGCGCAGGCGGGCGGCTTAAGTCTGATGT |
| V  | ct  | Firm  |        |         |           |             |  | GAAAACCCCGGGGCTCAACTGCGGGACTGCATTGAAACTGGCGGGCTTGAGTGCCGGAGAGGCAAGCGGA    |
| 39 | eri | icute | Clostr | Lachnos | Lachnospi | Lachnospira |  | ATTCCTAGTGTAGCGGTGAAATGCGTAGATATTAGGAGGAACACCAGTGCGCAAGGCGGCTTACTGGACTGT  |
| 8  | a   | s     | idia   | pirales | raceae    | ceae_Genus  |  | AACTGACGTTGAGGCTCGAAAGCGTGGGGAGCAAACAGG                                   |
| A  |     |       |        |         |           |             |  |                                                                           |
| S  | Ba  |       |        |         |           |             |  | TACGTATGGTGCAAGCGTTATCCGGATTTACTGGGTGTAAAGGGAGCGCAGGCGGGCGGGCAAGTCAGATGT  |
| V  | ct  | Firm  |        |         |           |             |  | GAAAGCCCGGGGCTCAACCCCGGGACTGCATTGAAACTGCCGGGCTAGAGTATCGGAGAGGCAAGTGGAA    |
| 10 | eri | icute | Clostr | Lachnos | Lachnospi | Lachnospira |  | TTCCTAGTGTAGCGGTGAAATGCGTAGATATTAGGAGGAACACCAGTGCGCAAGGCGGCTTGCTGGACGAT   |
| 4  | a   | s     | idia   | pirales | raceae    | ceae_Genus  |  | CACTGACGCTGAGGCTCGAAAGCGTGGGGAGCAAACAGG                                   |
| A  |     |       |        |         |           |             |  |                                                                           |
| S  | Ba  |       |        |         |           |             |  | TACGTATGGTGCAAGCGTTATCCGGATTTACTGGGTGTAAAGGGAGCGCAGGCGGGCGGGCAAGTCAGATGT  |
| V  | ct  | Firm  |        |         |           |             |  | GAAAGCCCGGGGCTCAACCCCGGGACTGCATTGAAACTGCCGGGCTAGAGTATCGGAGAGGCAAGGCGGA    |
| 56 | eri | icute | Clostr | Lachnos | Lachnospi | Lachnospira |  | ATTCCTAGTGTAGCGGTGAAATGCGTAGATATTAGGAGGAACACCAGTGCGCAAGGCGGCTTGCTGGACAG   |
| 6  | a   | s     | idia   | pirales | raceae    | ceae_Genus  |  | CAACTGACGCTGAGGCGCGAAAGCGTGGGGAGCAAACAGG                                  |
| A  |     |       |        |         |           |             |  |                                                                           |
| S  | Ba  |       |        |         |           |             |  | TACGTATGGTGCAAGCGTTATCCGGATTTACTGGGTGTAAAGGGAGCGCAGGCGGTTCTGCAAGTCTGATGT  |
| V  | ct  | Firm  |        |         |           |             |  | GAAAGCCCGGGGCTCAACCCCGGGACTGCATTGAAACTGCCGGGACTGGAGTGTCCGAGGGGTAAGCGGA    |
| 18 | eri | icute | Clostr | Lachnos | Lachnospi |             |  | ATTCCTGGTGTAGCGGTGAAATGCGTAGATATCAGGAGGAACACCAGTGCGCAAGGCGGCTTACTGGACGA   |
| 6  | a   | s     | idia   | pirales | raceae    | Roseburia   |  | TGACTGACGCTGAGGCTCGAAAGCGTGGGGAGCAAACAGG                                  |
| A  |     |       |        |         |           |             |  |                                                                           |
| S  | Ba  |       |        |         |           |             |  | TACGTATGGTGCAAGCGTTATCCGGATTTACTGGGTGTAAAGGGAGCGCAGGCGGTGCGGCAAGTCTGATGT  |
| V  | ct  | Firm  |        |         |           |             |  | GAAAGCCCGGGGCTCAACCCCGGGACTGCATTGAAACTACCGAAGTGTGCGAGAGGTAAGTGGGA         |
| 36 | eri | icute | Clostr | Lachnos | Lachnospi |             |  | ATTCCTAGTGTAGCGGTGAAATGCGTAGATATTAGGAGGAACACCAGTGCGCAAGGCGGCTTACTGGACGA   |
| 2  | a   | s     | idia   | pirales | raceae    | Roseburia   |  | TAACTGACGCTGAGGCTCGAAAGCGTGGGGAGCAAACAGG                                  |
| A  |     |       |        |         |           |             |  |                                                                           |
| S  | Ba  |       |        |         |           |             |  | TACGTATGGAGCAAGCGTTATCCGGATTTACTGGGTGTAAAGGGAGCGCAGGCGGTACGGCAAGTCCGATGT  |
| V  | ct  | Firm  |        |         |           |             |  | GAAAGCCCGGGGCTCAACCCCGGGACTGCATTGAAACTGCCGCACTAGAGTGCCGGAGAGGTAAGTGGGA    |
| 28 | eri | icute | Clostr | Lachnos | Lachnospi | Lachnospira |  | ATTCCTAGTGTAGCGGTGAAATGCGTAGATATTAGGAGGAACACCAGTGCGCAAGGCGGCTTACTGGACGG   |
| 8  | a   | s     | idia   | pirales | raceae    | 001         |  | TAACTGACGCTGAGGCTCGAAAGCGTGGGGAGCAAACAGG                                  |

|        |                      |            |                |                 |                         |                                                                                                                                                                                                                                                                  |
|--------|----------------------|------------|----------------|-----------------|-------------------------|------------------------------------------------------------------------------------------------------------------------------------------------------------------------------------------------------------------------------------------------------------------|
| ASV347 | Bacterial Firmicutes | Clostridia | Lachnospirales | Lachnospiraceae | Lachnospiraceae_UCG-001 | TACGTATGGAGCAAGCGTTATCCGGATTTACTGGGTGTAAAGGGAGCGCAGGCGGTACGGCAAGTCCGATGTGAAAACCCGGGGCTCAACCCCGGGACTGCATTGGAAACTGCCGCTAGAGTGCCGGAGAGGTAAGTGGAATTCTAGTGTAGCGGTGAAATGCGTAGATATTAGGAGGAACACCAGTGGCGAAGGCGGCTTACTGGACGGTAACTGACGCTGAGGCTCGAAAGCGTGGGGAGCAAACAGG       |
| ASV057 | Bacterial Firmicutes | Clostridia | Lachnospirales | Lachnospiraceae | Roseburia               | TACGTATGGTGC AAGCGTTATCCGGATTTACTGGGTGTAAAGGGAGCGCAGGCGGTGCGGCAAGTCTGATGTGAAAGCCCGGGGCCAACCCCGGTACTGCATTGGAAACTGCCGTACTTGAGTGTCCGAGGGGTAAGTGGAATTCTAGTGTAGCGGTGAAATGCGTAGATATTAGGAGGAACACCAGTGGCGAAGGCGGCTTACTGGACGACAACTGACGCTGAGGCTCGAAAGCGTGGGGAGCAAACAGG     |
| ASV348 | Bacterial Firmicutes | Clostridia | Lachnospirales | Lachnospiraceae | Agathobacter            | TACGTATGGTGC AAGCGTTATCCGGATTTACTGGGTGTAAAGGGAGCGCAGGCGGTGCGGCAAGTCTGATGTGAAAGCCCGGGGCTCAACCCCGGTACTGCATTGGAAACTGTCTGCTACTAGAGTGTCCGAGGGGTAAGCGGGAATTCTAGTGTAGCGGTGAAATGCGTAGATATTAGGAGGAACACCAGTGGCGAAGGCGGCTTACTGGACGATAACTGACGCTGAGGCTCGAAAGCGTGGGGAGCAAACAGG |
| ASV125 | Bacterial Firmicutes | Clostridia | Lachnospirales | Lachnospiraceae | Lachnospiraceae_UCG-001 | TACGTAGGGGGCAAGCGTTATCCGGATTTACTGGGTGTAAAGGGAGCGCAGGCGGTATGGCAAGTCAGATGTGAAAACCCAGGGCTCAACCCCTGGGACTGCATTGAAACTGCCATACTGGAGTGCCGGAGAGGTAAGTGGAATTCTAGTGTAGCGGTGAAATGCGTAGATATTAGGAGGAACACCAGTGGCGAAGGCGGCTTACTGGACGGTAACTGACGCTGAGGCTCGAAAGCGTGGGGAGCAAACAGG     |
| ASV173 | Bacterial Firmicutes | Clostridia | Lachnospirales | Lachnospiraceae | Lachnospiraceae_UCG-001 | TACGTAGGGGGCAAGCGTTATCCGGATTTACTGGGTGTAAAGGGAGCGCAGGCGGTATGGCAAGTCAGATGTGAAAACCCAGGGCCCCAACCCCTGGGACTGCATTGAAACTGCCATACTGGAGTGCCGGAGAGGTAAGTGGAATTCTAGTGTAGCGGTGAAATGCGTAGATATTAGGAGGAACACCAGTGGCGAAGGCGGCTTACTGGACGGTAACTGACGCTGAGGCTCGAAAGCGTGGGGAGCAAACAGG    |
| ASV308 | Bacterial Firmicutes | Clostridia | Lachnospirales | Lachnospiraceae | Lachnospiraceae_UCG-001 | TACGTAGGGGGCGAGCGTTATCCGGATTTACTGGGTGTAAAGGGAGCGCAGGCGGCGTGCGCAAGTCAGATGTGAAAACCCGGGGGCCAACCCCGGGACTGCATTGAAACTGCCATGCTGGAGTGCCGGAGAGGCAAGTGGAATTCTAGTGTAGCGGTGAAATGCGTAGATATTAGGAGGAACACCAGTGGCGGAGGCGGCTTGCTGGACGGTAACTGACGCTGAGGCTCGAAAGCGTGGGGAGCAAACAGG     |
| ASV036 | Bacterial Firmicutes | Clostridia | Lachnospirales | Lachnospiraceae | Lachnospiraceae_UCG-001 | TACGTAGGGGGCAAGCGTTATCCGGATTTACTGGGTGTAAAGGGAGCGCAGGCGGCGTGCGCAAGTCAGATGTGAAAACCCGGGGGCCAACCCCGGGAGTGCATTGAAACTGCCATGCTGGAGTGCCGGAGAGGTAAGCGGAATTCTAGTGTAGCGGTGAAATGCGTAGATATTAGGAGGAACACCAGTGGCGGAGGCGGCTTACTGGACGGTAACTGACGCTGAGGCTCGAAAGCGTGGGGAGCAAACAGG     |
| ASV327 | Bacterial Firmicutes | Clostridia | Lachnospirales | Lachnospiraceae | Lachnospiraceae_UCG-001 | TACGTAGGGGGCAAGCGTTATCCGGATTTACTGGGTGTAAAGGGAGCGCAGGCGGCGTGCGCAAGTCAGATGTGAAAACCCGGGGGCCAACCCCGGGAGTGCATTGAAACTGCCATGCTGGAGTGCCGGAGAGGTAAGTGGAATTCTAGTGTAGCGGTGAAATGCGTAGATATTAGGAGGAACACCAGTGGCGGAGGCGGCTTACTGGACGGTAACTGACGCTGAGGCTCGAAAGCGTGGGGAGCAAACAGG     |
| ASV    | Bacterial Firmicutes | Clostridia | Lachnospirales | Lachnospiraceae | Lachnospiraceae_Genus   | TACGTAGGGGGCAAGCGTTATCCGGATTTACTGGGTGTAAAGGGAGCGCAGGCGGCGAGCGCAAGTCTGATGTGAAAGCCCGGGGCCAACCCCGGGACTGCATTGAAACTGCGCAGCTGGAGTGCCGGAGGGGTAAGCGGAATTCTAGTGTAGCGGTGAAATGCGTAGATATTAGGAGGAACACCAGTGGCGAAGGCGGCTTACTGGACGGCAACTGACGCTGAGGCTCGAAAGCGTGGGGAGCAAACAGG      |

|    |     |       |        |         |           |             |                                                                          |
|----|-----|-------|--------|---------|-----------|-------------|--------------------------------------------------------------------------|
| 35 |     |       |        |         |           |             |                                                                          |
| 5  |     |       |        |         |           |             |                                                                          |
| A  |     |       |        |         |           |             |                                                                          |
| S  | Ba  |       |        |         |           |             | TACGTAGGGGGCAAGCGTTATCCGGATTTACTGGGTGTAAAGGGAGCGTAGACGGATGGACAAGTCTGATG  |
| V  | ct  | Firm  |        |         |           |             | TGAAAGGCTGGGGCTCAACCCCGGGACTGCATTGGAAACTGCCCGTCTTGAGTGCCGGAGAGGTAAGCGGA  |
| 35 | eri | icute | Clostr | Lachnos | Lachnospi |             | ATTCCTAGTGTAGCGGTGAAATGCGTAGATATTAGGAGGAACACCAGTGGCGAAGGCGGCTTACTGGACGG  |
| 7  | a   | s     | idia   | pirales | raceae    | Blautia     | TAACTGACGTTGAGGCTCGAAAGCGTGGGGAGCAAAACAGG                                |
| A  |     |       |        |         |           |             |                                                                          |
| S  | Ba  |       |        |         |           |             | TACGTATGGAGCAAGCGTTATCCGGAATTACTGGGTGTAAAGGGAGCGTAGACGGATGTGCAAGTCTGATGT |
| V  | ct  | Firm  |        |         |           |             | GAAAGGCGGGGCTCAACCCCTGGACTGCATTGGAAACTGTAAATCTTGAGTGCCGGAGAGGTAAGCGGAA   |
| 05 | eri | icute | Clostr | Lachnos | Lachnospi | Marvinbrya  | TTCCTAGTGTAGCGGTGAAATGCGTAGATATTAGGAGGAACACCAGTGGCGAAGGCGGCTTACTGGACGGT  |
| 3  | a   | s     | idia   | pirales | raceae    | ntia        | AACTGACGTTGAGGCTCGAAAGCGTGGGGAGCAAAACAGG                                 |
| A  |     |       |        |         |           |             |                                                                          |
| S  | Ba  |       |        |         |           |             | TACGTATGGAGCAAGCGTTATCCGGAATTACTGGGTGTAAAGGGAGCGTAGACGGATCTGCAAGTCTGATGT |
| V  | ct  | Firm  |        |         |           |             | GAAAGGCGGGGCTCAACTCCTGGACTGCATTGGAAACTGTAGATCTTGAGTGCCGGAGAGGTAAGCGGAA   |
| 13 | eri | icute | Clostr | Lachnos | Lachnospi | Marvinbrya  | TTCCTAGTGTAGCGGTGAAATGCGTAGATATTAGGAGGAACACCAGTGGCGAAGGCGGCTTACTGGACGGT  |
| 7  | a   | s     | idia   | pirales | raceae    | ntia        | AACTGACGTTGAGGCTCGAAAGCGTGGGGAGCAAAACAGG                                 |
| A  |     |       |        |         |           |             |                                                                          |
| S  | Ba  |       |        |         |           |             | TACGTAGGGGGCAAGCGTTATCCGGATTTACTGGGTGTAAAGGGAGCGTAGACGGCGTGCCAAGTCTGATGT |
| V  | ct  | Firm  |        |         |           |             | GAAAGGCCGGGGCTCAACCCCGGGACTGCATTGGAAACTGGCATGCTGGAGTGCCGGAGGGGCAAGCGGA   |
| 03 | eri | icute | Clostr | Lachnos | Lachnospi | Marvinbrya  | ATTCCTAGTGTAGCGGTGAAATGCGTAGATATTAGGAGGAACACCAGTGGCGAAGGCGGCTTGCTGGACGG  |
| 1  | a   | s     | idia   | pirales | raceae    | ntia        | TAACTGACGTTGAGGCTCGAAAGCGTGGGGAGCAAAACAGG                                |
| A  |     |       |        |         |           |             |                                                                          |
| S  | Ba  |       |        |         |           |             | TACGTAGGGGGCAAGCGTTATCCGGATTTACTGGGTGTAAAGGGAGCGTAGACGGTGTGGCAAGTCTGATGT |
| V  | ct  | Firm  |        |         |           |             | GAAAGGCATGGGCTCAACCTGTGGACTGCATTGGAAACTGTCATACTTGAGTGCCGGAGGGGTAAGCGGAA  |
| 29 | eri | icute | Clostr | Lachnos | Lachnospi |             | TTCCTAGTGTAGCGGTGAAATGCGTAGATATTAGGAGGAACACCAGTGGCGAAGGCGGCTTACTGGACGGT  |
| 0  | a   | s     | idia   | pirales | raceae    | Blautia     | AACTGACGTTGAGGCTCGAAAGCGTGGGGAGCAAAACAGG                                 |
| A  |     |       |        |         |           |             |                                                                          |
| S  | Ba  |       |        |         |           |             | TACGTAGGGGGCAAGCGTTATCCGGATTTACTGGGTGTAAAGGGAGCGTAGACGGCGCAGCAAGTCTGATG  |
| V  | ct  | Firm  |        |         |           |             | TGAAAGGCAGGGGCTTAACCCCTGGACTGCATTGGAAACTGCTGTGCTTGAGTGCCGGAGGGGTAAGCGGA  |
| 37 | eri | icute | Clostr | Lachnos | Lachnospi |             | ATTCCTAGTGTAGCGGTGAAATGCGTAGATATTAGGAGGAACACCAGTGGCGAAGGCGGCTTACTGGACGG  |
| 4  | a   | s     | idia   | pirales | raceae    | Blautia     | TAACTGACGTTGAGGCTCGAAAGCGTGGGGAGCAAAACAGG                                |
| A  |     |       |        |         |           |             |                                                                          |
| S  | Ba  |       |        |         |           |             | TACGTAGGGGGCAAGCGTTATCCGGATTTACTGGGTGTAAAGGGAGCGTAGACGGCATTGCAAGTCTGATGT |
| V  | ct  | Firm  |        |         |           | Lachnospira | GAAAGATTGGGGCTCAACCCAGGCCTGCATTGGAAACTGTAAAGCTGGAGTACAGGAGAGGTAAGCGGA    |
| 03 | eri | icute | Clostr | Lachnos | Lachnospi | ceae_NK4A1  | ATTCCTAGTGTAGCGGTGAAATGCGTAGATATTAGGAGGAACACCAGTGGCGAAGGCGGCTTACTGGACTGT |
| 9  | a   | s     | idia   | pirales | raceae    | 36_group    | AACTGACGTTGAGGCTCGAAAGCGTGGGGAGCAAAACAGG                                 |
| A  |     |       |        |         |           |             |                                                                          |
| S  | Ba  |       |        |         |           |             | TACGTAGGGGGCAAGCGTTATCCGGATTTACTGGGTGTAAAGGGAGCGTAGACGGCATAGCAAGTCTGATGT |
| V  | ct  | Firm  |        |         |           |             | GAAAGATCGGGGCTCAACCCCGGGCTGCATTGGAAACTGTAAAGCTGGAGTACAGGAGAGGTAAGCGGAA   |
| 04 | eri | icute | Clostr | Lachnos | Lachnospi | Lachnospira | TTCCTAGTGTAGCGGTGAAATGCGTAGATATTAGGAGGAACACCAGTGGCGAAGGCGGCTTACTGGACTGTA |
| 8  | a   | s     | idia   | pirales | raceae    | ceae_Genus  | ACTGACGTTGAGGCTCGAAAGCGTGGGGAGCAAAACAGG                                  |

|    |     |       |         |          |             |               |  |                                                                          |
|----|-----|-------|---------|----------|-------------|---------------|--|--------------------------------------------------------------------------|
| A  | S   | Ba    |         |          |             |               |  | TACGTAGGGGGCAAGCGTTATCCGGATTTACTGGGTGTAAAGGGAGCGTAGACGGCATGGCAAGTCTGAAG  |
|    | V   | ct    | Firm    |          |             |               |  | TGAAAGCCCGGGCTCAACCGCGGGACTGCTTTGGAACTGTAAAGCTGGAGTGCAGGAGAGGTAAGTGGAA   |
| 40 | eri | icute | Clostr  | Lachnos  | Lachnospi   | Lachnospi     |  | ATTCTAGTGTAGCGGTGAAATGCGTAGATATTAGGAGGAACACCAGTGGCGAAGGCGGCTTACTGGACTGT  |
| 1  | a   | s     | idia    | pirales  | raceae      | ceae_Genus    |  | AACTGACGTTGAGGCTCGAAAGCGTGGGGAGCAAACAGG                                  |
| A  | S   | Ba    |         |          |             |               |  | TACGTAGGTGGCAAGCGTTATCCGGAATGATTGGGCGTAAAGGGTGCGTAGGCGGCAAAAATAAGTCTGAAG |
|    | V   | ct    | Firm    |          | Erysipel    |               |  | TAAAAGGCGTTGGCTCAACCAACGTAAGCTTTGGAACTGTAAAGCTAGCGTGCAGGAGAGGTTAGTGGAA   |
| 26 | eri | icute |         | otrichal | Erysipelot  |               |  | TTCCATGTGTAGCGGTAAAATGCGTAGATATATGGAGGAACACCAGTGGCGAAGGCGGCTAACTGGCCTGT  |
| 4  | a   | s     | Bacilli | es       | richaceae   | Breznakia     |  | AACGGACGCTGAGGCACGAAAGCGTGGGGAGCAAATAGG                                  |
| A  | S   | Ba    |         |          |             |               |  | TACGTAGGTGGCGAGCGTTATCCGGAATGATTGGGCGTAAAGGGTGCGCAGGCGGCGCATTAAGTTTGAAGT |
|    | V   | ct    | Firm    |          | Erysipel    |               |  | AAAAGGTAGCGGCTCAACCGCTGCAAGCTTCGAAAACCTGGTGTGCTGGAGTGCAGGAGAGGGCAGTGGAA  |
| 23 | eri | icute |         | otrichal | Erysipelot  | Erysipelotric |  | TCCATGTGTAGCGGTAAAATGCGTAGATATATGGAGGAACACCAGTGGCGAAGGCGGCTGCTGGCCTGTA   |
| 3  | a   | s     | Bacilli | es       | richaceae   | us            |  | ACTGACGCTGAGGCACGAAAGCGTGGGGAGCAAATAGG                                   |
| A  | S   | Ba    |         |          |             |               |  | TACGTAGGTGGCGAGCGTTATCCGGAATGATTGGGCGTAAAGGGTGCGTAGGTGGCAGAACAAAGTCTGGAG |
|    | V   | ct    | Firm    |          | Erysipel    |               |  | TAAAAGGTATGGGCTCAACCCGTAAGCTTTGGAACTGTTCAGCTAGAGAACAGAAGAGGACGGCGGAA     |
| 47 | eri | icute |         | otrichal | Erysipelot  | Holdemanel    |  | CTCCATGTGTAGCGGTAAAATGCGTAGATATATGGAAGAACACCAGTGGCGAAGGCGGCCGTCTGGTCTGTT |
| 2  | a   | s     | Bacilli | es       | richaceae   | la            |  | GCTGACACTGAAGCACGAAAGCGTGGGGAGCAAATAGG                                   |
| A  | S   | Ba    |         |          |             |               |  | TACGTAGGTGGCGAGCGTTATCCGGAATGATTGGGCGTAAAGGGTGCGCAGGCGGTCTGCAAGTCTGGAGT  |
|    | V   | ct    | Firm    |          | Erysipel    |               |  | GAAACGCATGAGCTCAACTCATGCATGGCTTTGGAACTGGAGGACTGGAGAGCAGGAGAGGGCGGTGGA    |
| 38 | eri | icute |         | otrichal | Erysipelot  | Faecalibacul  |  | ACTCCATGTGTAGCGGTAAAATGCGTAGATATATGGAAGAACACCAGTGGCGAAGGCGGCCCTGGCCTG    |
| 0  | a   | s     | Bacilli | es       | richaceae   | um            |  | TTGCTGACGCTGAGGCACGAAAGCGTGGGGAGCAAATAGG                                 |
| A  | S   | Ba    |         |          |             |               |  | TACGTAGGTGGCAAGCGTTATCCGGAATGATTGGGCGTAAAGGGTGCGCAGGCGGATGTATAAGTCTGAAG  |
|    | V   | ct    | Firm    |          | Erysipel    |               |  | TAAAAGCCATCGGCTCAACCGATGTAAGCTTTGGAACTGTAGATCTAGAGTGCAGGAGAGGACAGTGGAA   |
| 30 | eri | icute |         | otrichal | Erysipelot  | Erysipelotric |  | TTCCATGTGTAGCGGTAAAATGCGTAGATATATGGAGGAACACCAGTGGCGAAGGCGGCTGTCTGGCCTGTA |
| 5  | a   | s     | Bacilli | es       | richaceae   | us            |  | ACTGACGCTGAGGCACGAAAGCGTGGGGAGCAAATAGG                                   |
| A  | S   | Ba    |         |          |             |               |  | TACGTAGGTGGCAAGCGTTATCCGGAATGATTGGGCGTAAAGGGTGCGCAGGCGGAACCATAAGTCTGAAG  |
|    | V   | ct    | Firm    |          | Erysipel    |               |  | TAAAAGCCATCGGCTCAACCGATGTAAGCTTTGGAACTGTGGATCTAGAGTGCAGGAGAGGACAGTGGAA   |
| 16 | eri | icute |         | otrichal | Erysipelot  | Erysipelotric |  | TTCCATGTGTAGCGGTAAAATGCGTAGATATATGGAGGAACACCAGTGGCGAAGGCGGCTGTCTGGCCTGTA |
| 3  | a   | s     | Bacilli | es       | richaceae   | us            |  | ACTGACGCTGAGGCACGAAAGCGTGGGGAGCAAATAGG                                   |
| A  | S   | Ba    |         |          |             |               |  | TACGTAGGTGGCAAGCGTTATCCGGAATGATTGGGCGTAAAGGGTGCGCAGGCGGAACCATAAGTCTGAAG  |
|    | V   | ct    | Firm    |          | Erysipel    |               |  | TAAAAGCCATCGGCTCAACCGATGTAAGCTTTGGAACTGTGGATCTGGAGTGCAGGAGAGGACAGTGGAA   |
| 24 | eri | icute |         | otrichal | Erysipelot  | Erysipelotric |  | TTCCATGTGTAGCGGTAAAATGCGTAGATATATGGAGGAACACCAGTGGCGAAGGCGGCTGTCTGGCCTGTA |
| 4  | a   | s     | Bacilli | es       | richaceae   | us            |  | ACTGACGCTGAGGCACGAAAGCGTGGGGAGCAAATAGG                                   |
| A  | S   | Ba    |         |          |             |               |  | TACGTATGGAGCAAGCGTTATCCGGATTTACTGGGTGTAAAGGGAGAGTAGGTGGCAGAGCAAGTCCGAAG  |
|    | V   | ct    | Firm    |          | Erysipelot  | Erysipelotoc  |  | TGAAAACCCAAAGCTCAACTATGGGAATGCTTTAGAACTGCTCAGCTAGAGTGCAGTAGAGGATCGTGGAA  |
| AS | eri | icute |         | otrichal | oclostridia | lostridiaceae |  | ATTCCATGTGTAGCGGTGAAATGCGTAGATATATGGAGGAACACCAGTGGCGAAGGCGACGATCTGGGCTG  |
| V  | a   | s     | Bacilli | es       | ceae        | _Genus        |  | CAACTGACGCTCAGTCCCGAAAGCGTGGGGAGCAAACAGG                                 |

|    |     |                 |         |                            |                                   |                                         |                                                                           |
|----|-----|-----------------|---------|----------------------------|-----------------------------------|-----------------------------------------|---------------------------------------------------------------------------|
| 52 |     |                 |         |                            |                                   |                                         |                                                                           |
| 2  |     |                 |         |                            |                                   |                                         |                                                                           |
| A  |     |                 |         |                            |                                   |                                         |                                                                           |
| S  | Ba  | Firm<br>er<br>a | Bacilli | Erysipel<br>otrichal<br>es | Erysipelat<br>oclostridia<br>ceae | Erysipelatoc<br>lostridiaceae<br>_Genus | TACGTAGGTGGCGAGCGTTATCCGGAATTATTGGGCGTAAAGAGGGAGCAGGCGGCAGCTAAGGTCTGCGG   |
| V  | ct  |                 |         |                            |                                   |                                         | TGAAAGCCCCGAAGCTAAACTTCGGTAAGCCGTGGAAACCGGAGCAGCTAGAGTGCAGTAGAGGATCGTGGA  |
| 13 | eri |                 |         |                            |                                   |                                         | ATTCCATGTGTAGCGGTGAAATGCGTAGATATATGGAGGAACACCAGTGGCGAAGGCGACGATCTGGGCTG   |
| 6  | a   | s               |         |                            |                                   |                                         | CAACTGACGCTCAGTCCCGAAAGCGTGGGGAGCAAATAGG                                  |
| A  |     |                 |         |                            |                                   |                                         |                                                                           |
| S  | Ba  | Firm<br>er<br>a | Bacilli | Erysipel<br>otrichal<br>es | Erysipelat<br>oclostridia<br>ceae | Erysipelatoc<br>lostridium              | TACGTAGGTGGCGAGCGTTATCCGGAATCATTGGGCGTAAAGAGGGAGCAGGCGGCCTGGAGGGTCTATTG   |
| V  | ct  |                 |         |                            |                                   |                                         | TTAAAAGGCAGTGGCTTAACCATTGCAAGGCGAAGAAACCGGAGGCTAGAGTTCTAAAGAGGATCGTGGA    |
| 33 | eri |                 |         |                            |                                   |                                         | ATTCCATGTGTAGCGGTGAAATGCGTAGATATATGGAGGAACACCAGTGGCGAAGGCGACGATCTGGGAAG   |
| 7  | a   | s               |         |                            |                                   |                                         | AAACAGACGCTGAGTCCCGAAAGCGTGGGGAGCAAATAGG                                  |
| A  |     |                 |         |                            |                                   |                                         |                                                                           |
| S  | Ba  | Firm<br>er<br>a | Bacilli | Erysipel<br>otrichal<br>es | Erysipelat<br>oclostridia<br>ceae | Erysipelatoc<br>lostridium              | TACGTAGGTGGCGAGCGTTATCCGGAATCATTGGGCGTAAAGAGGGAGCAGGCGGCCTGGAGGGTCTATTG   |
| V  | ct  |                 |         |                            |                                   |                                         | TTAAAAGGCATGGCTTAACCATTGTAAGGCGAAGAAACCGGAGGCTAGAGTTCTAAAGAGGATCGTGGA     |
| 35 | eri |                 |         |                            |                                   |                                         | ATTCCATGTGTAGCGGTGAAATGCGTAGATATATGGAGGAACACCAGTGGCGAAGGCGACGATCTGGGAAG   |
| 6  | a   | s               |         |                            |                                   |                                         | AAACAGACGCTGAGTCCCGAAAGCGTGGGGAGCAAATAGG                                  |
| A  |     |                 |         |                            |                                   |                                         |                                                                           |
| S  | Ba  | Firm<br>er<br>a | Bacilli | Lactoba<br>cillales        | Leuconost<br>ocaceae              | Weissella                               | TACGTATGTTCCAAGCGTTATCCGGATTTATTGGGCGTAAAGCGAGCGCAGACGGTTATTTAAGTCTGAAGTG |
| V  | ct  |                 |         |                            |                                   |                                         | AAAGCCCTCAGCTCAACTGAGGAATTGCTTTGGAAACTGGATGACTTGAGTGCAGTAGAGGAAAGTGGAAAC  |
| 37 | eri |                 |         |                            |                                   |                                         | TCCATGTGTAGCGGTGAAATGCGTAGATATATGGAGGAACACCAGTGGCGAAGGCGGCTTTCTGGACTGTAA  |
| 0  | a   | s               |         |                            |                                   |                                         | CTGACGTTGAGGCTCGAAAGTGTGGGTAGCAAACAGG                                     |
| A  |     |                 |         |                            |                                   |                                         |                                                                           |
| S  | Ba  | Firm<br>er<br>a | Bacilli | Lactoba<br>cillales        | Streptococ<br>caceae              | Streptococcu<br>s                       | TACGTAGGTCCCGAGCGTTATCCGGATTTATTGGGCGTAAAGCGAGCGCAGGCGGTTGGATAAGTCTGAAGT  |
| V  | ct  |                 |         |                            |                                   |                                         | TAAAGGCTGTGGCTCAACCATAGTATGCTTTGGAAACTGTTCAACTTGAGTGCAGAAGGGGAGAGTGGAATT  |
| 24 | eri |                 |         |                            |                                   |                                         | CCATGTGTAGCGGTGGAATGCGTAGATATATGGAGGAACACCGGTGGCGAAAGCGGCTCTCTGGTCTGTAAC  |
| 9  | a   | s               |         |                            |                                   |                                         | TGACGCTGAGGCTCGAAAGCGTGGGTAGCGAACAGG                                      |
| A  |     |                 |         |                            |                                   |                                         |                                                                           |
| S  | Ba  | Firm<br>er<br>a | Bacilli | Lactoba<br>cillales        | Streptococ<br>caceae              | Streptococcu<br>s                       | TACGTAGGTCCCGAGCGTTGTCCGGATTTATTGGGCGTAAAGCGAGCGCAGGCGGTTTGATAAGTCTGAAGT  |
| V  | ct  |                 |         |                            |                                   |                                         | TAAAGGCTGTGGCTCAACCATAGTTCGCTTTGGAAACTGTCAAACCTTGAGTGCAGAAGGGGAGAGTGGAATT |
| 37 | eri |                 |         |                            |                                   |                                         | CCATGTGTAGCGGTGAAATGCGTAGATATATGGAGGAACACCGGTGGCGAAAGCGGCTCTCTGGTCTGTAAC  |
| 6  | a   | s               |         |                            |                                   |                                         | TGACGCTGAGGCTCGAAAGCGTGGGGAGCGAACAGG                                      |
| A  |     |                 |         |                            |                                   |                                         |                                                                           |
| S  | Ba  | Firm<br>er<br>a | Bacilli | Lactoba<br>cillales        | Lactobacill<br>aceae              | Lactobacillu<br>s                       | TACGTAGGTGGCAAGCGTTGTCCGGATTTATTGGGCGTAAAGCGAGTGCAGGCGGTTCAATAAGTCTGATGT  |
| V  | ct  |                 |         |                            |                                   |                                         | GAAAGCCTTCGGCTCAACCGGAGAATTGCATCAGAAACTGTTGAACCTTGAGTGCAGAAGAGGAGAGTGGA   |
| 00 | eri |                 |         |                            |                                   |                                         | CTCCATGTGTAGCGGTGGAATGCGTAGATATATGGAAGAACACCAGTGGCGAAGGCGGCTCTCTGGTCTGCA  |
| 1  | a   | s               |         |                            |                                   |                                         | ACTGACGCTGAGGCTCGAAAGCATGGGTAGCGAACAGG                                    |
| A  |     |                 |         |                            |                                   |                                         |                                                                           |
| S  | Ba  | Firm<br>er<br>a | Bacilli | Lactoba<br>cillales        | Enterococ<br>caceae               | Enterococcu<br>s                        | TACGTAGGTGGCAAGCGTTGTCCGGATTTATTGGGCGTAAAGCGAGCGCAGGCGGTTTCTTAAGTCTGATGT  |
| V  | ct  |                 |         |                            |                                   |                                         | GAAAGCCCCCGGCTCAACCGGGGAGGGTCATTGGAACTGGGAGACTTGAGTGCAGAAGAGGAGAGTGGA     |
| 04 | eri |                 |         |                            |                                   |                                         | ATTCCATGTGTAGCGGTGAAATGCGTAGATATATGGAGGAACACCAGTGGCGAAGGCGGCTCTCTGGTCTGT  |
| 7  | a   | s               |         |                            |                                   |                                         | AACTGACGCTGAGGCTCGAAAGCGTGGGGAGCAAACAGG                                   |

|   |    |     |       |          |            |              |  |                                                                           |
|---|----|-----|-------|----------|------------|--------------|--|---------------------------------------------------------------------------|
| A | S  | Ba  |       |          |            |              |  | TACGTAGGTGGCAAGCGTTGTCCGATTATTGGGCGTAAAGCGAGCGCAGGCGGTTTCTTAAGTCTGATGT    |
| V | 51 | ct  | Firm  |          |            | Carnobacteri |  | GAAAGCCCCCGGCTCAACCGGGGAGGGTCATTGGAAACTGGGAGACTTGAGTGCAGAAGGGGAGAGTGGAA   |
|   | 2  | eri | icute | Lactoba  | Carnobact  | aceae_Genu   |  | ATTCCATGTGTAGCGGTAGAATGCGTAGATATTAGAAGGAACACCAGTGGCGAAGGCGACTTGCTGGGCCA   |
| A |    | a   | s     | Bacilli  | eriales    | s            |  | TCACTGACGGTCAGGGACGAAAGCGTGGGGAGCGAATAGG                                  |
| S | V  | Ba  |       |          |            |              |  | TACGTAGGTGGCAAGCGTTATCCGGAATTATTGGGCGTAAAGAGCGCGCAGGTGGTTAATTAAGTCTGATGT  |
|   | 44 | ct  | Firm  |          | Bacilli_Or | Bacilli_Orde |  | GAAAGCCCCACGGCTTAACCGTGGAGGGTCATTGGAAACTGTGGAAGTGGAGTGTGGAGAGGCAAGCGGA    |
| A | 5  | eri | icute | Bacilli  | der_Famil  | r_Family_Ge  |  | ATTCCATGTGTAGCGGTGAAATGCGTAGATATCAGGAGGAACACCGGCGCGCAAGGCGGCTTGCTGGACTA   |
|   |    | a   | s     |          | Order      | nus          |  | AAACTGACGTTGAGGCTCGAAAGCGTGGGGAGCAAACAGG                                  |
| S | V  | Ba  |       |          |            |              |  | TACGTAGGTGGCAAGCGTTATCCGGAATTATTGGGCGTAAAGAGCGCGCAGGTGGTTAATTAAGTCTGATGT  |
|   | 22 | ct  | Firm  | Erysipel |            |              |  | GAAAGCCCCACGGCTTAACCGTGGAGGGTCATTGGAAACTGGTTGACTTGAGTGCAGAAGAGGGAAAGTGGAA |
| A | 6  | eri | icute | otrichal | Erysipelot |              |  | TTCCATGTGTAGCGGTGAAATGCGTAGAGATATGGAGGAACACCAGTGGCGAAGGCGGCTTCTGGTCTGTA   |
|   |    | a   | s     | Bacilli  | richaceae  | Turicibacter |  | ACTGACACTGAGGCGCGAAAGCGTGGGGAGCAAACAGG                                    |
| S | V  | Ba  |       |          |            |              |  | TACGTAGGTGGCAAGCGTTATCCGGAATTATTGGGCGTAAAGAGCGCGCAGGTGGTTGATTAAGTCTGATGT  |
|   | 08 | ct  | Firm  | Erysipel |            |              |  | GAAAGCCCCACGGCTTAACCGTGGAGGGTCATTGGAAACTGGTTGACTTGAGTGCAGAAGAGGGAAAGTGGAA |
| A | 4  | eri | icute | otrichal | Erysipelot |              |  | TTCCATGTGTAGCGGTGAAATGCGTAGAGATATGGAGGAACACCAGTGGCGAAGGCGGCTTCTGGTCTGCA   |
|   |    | a   | s     | Bacilli  | richaceae  | Turicibacter |  | ACTGACACTGAGGCGCGAAAGCGTGGGGAGCAAACAGG                                    |
| S | V  | Ba  |       |          |            |              |  | TACGTAGGTGGCAAGCGTTATCCGGAATTATTGGGCGTAAAGAGCGCGCAGGTGGTTAATTAAGTCTGATGT  |
|   | 00 | ct  | Firm  | Erysipel |            |              |  | GAAAGCCCCACGGCTTAACCGTGGAGGGTCATTGGAAACTGGTTGACTTGAGTGCAGAAGAGGGAAAGTGGAA |
| A | 3  | eri | icute | otrichal | Erysipelot |              |  | TTCCATGTGTAGCGGTGAAATGCGTAGAGATATGGAGGAACACCAGTGGCGAAGGCGGCTTCTGGTCTGCA   |
|   |    | a   | s     | Bacilli  | richaceae  | Turicibacter |  | ACTGACACTGAGGCGCGAAAGCGTGGGGAGCAAACAGG                                    |
| S | V  | Ba  |       |          |            |              |  | TACGTAGGTGGTAAGCGTTATCCGGAATTATTGGGCGTAAAGAGCGCGCAGGTGGTTAATTAAGTCTGATGT  |
|   | 07 | ct  | Firm  | Erysipel |            |              |  | GAAAGCCCCACGGCTTAACCGTGGAGGGTCATTGGAAACTGGTTGACTTGAGTGCAGAAGAGGGAAAGTGGAA |
| A | 7  | eri | icute | otrichal | Erysipelot |              |  | TTCCATGTGTAGCGGTGAAATGCGTAGAGATATGGAGGAACACCAGTGGCGAAGGCGGCTTCTGGTCTGCA   |
|   |    | a   | s     | Bacilli  | richaceae  | Turicibacter |  | ACTGACACTGAGGCGCGAAAGCGTGGGGAGCAAACAGG                                    |
| S | V  | Ba  |       |          |            |              |  | TACGTAGGTGGCAAGCGTTATCCGGAATTATTGGGCGTAAAGCGCGCGTAGGCGGTTTCTTAAGTCTGATGT  |
|   | 17 | ct  | Firm  | Staphyl  |            |              |  | GAAAGCCCCACGGCTCAACCGTGGAGGGTCATTGGAAACTGGGAACTTGAGTGCAGAAGAGGAAAGTGGAA   |
| A | 6  | eri | icute | ococcale | Staphyloc  | Staphylococ  |  | ATTCCATGTGTAGCGGTGAAATGCGCAGAGATATGGAGGAACACCAGTGGCGAAGGCGACTTCTCTGGTCTGT |
|   |    | a   | s     | Bacilli  | occaceae   | cus          |  | AACTGACGCTGATGTGCGAAAGCGTGGGGATCAAACAGG                                   |
| S | V  | Ba  |       |          |            |              |  | TACGTAGGTGGCAAGCGTTATCCGGAATTATTGGGCGTAAAGCGCGCGTAGGCGGTTTCTTAAGTCTGATGT  |
|   | 30 | ct  | Firm  | Staphyl  |            |              |  | GAAAGCCCCACGGCTCAACCGTGGAGGGTCATTGGAAACTGGGAACTTGAGTGCAGAAGAGGAGAGTGGAA   |
| A | 1  | eri | icute | ococcale | Staphyloc  | Staphylococ  |  | ATTCCATGTGTAGCGGTGAAATGCGCAGAGATATGGAGGAACACCAGTGGCGAAGGCGGCTCTCTGGTCTGT  |
|   |    | a   | s     | Bacilli  | occaceae   | cus          |  | AACTGACGCTGATGTGCGAAAGCGTGGGGATCAAACAGG                                   |
| S | V  | Ba  |       |          |            |              |  | TACGTAGGGGGCAAGCGTTATCCGGAATTACTGGGTGTAAAGGGAGCGTAGACGGTGCGCCAAGTCTGGAG   |
|   | 3  | ct  | Firm  |          |            |              |  | TGAAATGCCGCAGCTTAACTGCGGAACTGCTTTGGAAACTGGCGAACTAGAGTGCAGAAGAGGAGAGTGGAA  |
| A | 1  | eri | icute | Clostr   | Lachnos    | Lachnospira  |  | ACTCCATGTGTAGCGGTGAAATGCGTAGATATATGAAAGAACACCAGTGGCGAAGGCGGCTCTCTGGTCTGC  |
| V | 1  | a   | s     | idia     | pirales    | ceae_Genus   |  | AACTGACGCTGAGGCTCGAAAGCATGGGTAGCGAACAGG                                   |

|    |     |       |        |          |           |             |                                                                            |
|----|-----|-------|--------|----------|-----------|-------------|----------------------------------------------------------------------------|
| 46 |     |       |        |          |           |             |                                                                            |
| 6  |     |       |        |          |           |             |                                                                            |
| A  |     |       |        |          |           |             |                                                                            |
| S  | Ba  |       |        |          |           |             | TACGGAGGATGCGAGCGTTATCCGGATTTATTGGGTTTAAAGGGTGCGTAGACGGTGCGCCAAGTCTGGAGT   |
| V  | ct  | Firm  |        |          |           |             | GAAATGCCGCAGCTTAACTGCGGAACTGCTTTGGAACTGGCGAACTAGAGTGCGGGAGGGGTAAGCGGAA     |
| 49 | eri | icute | Clostr | Lachnos  | Lachnospi | Lachnospira | TTCCCTAGTGTAGCGGTGAAATGCGTAGATATTAGGAGGAACACCAGTGCGGAAGGCGACTTTCTGGACAGTA  |
| 8  | a   | s     | idia   | pirales  | raceae    | ceae_Genus  | ACTGACGTTGAGGCACGAAAGTGTGGGGAGCAAACAGG                                     |
| A  |     |       |        |          |           |             |                                                                            |
| S  | Ba  |       |        |          |           |             | TACGTAGGGGGCAAGCGTTATCCGGATTTACTGGGTGTAAAGGGAGCGTAGACGGTGCGCCAAGTCTGGAG    |
| V  | ct  | Firm  |        |          |           |             | TGAAATGCCGCAGCTTAACTGCGGAACTGCTTTGGAACTGGCGAACTAGAGTGCGGGAGGGGTAAGCGGA     |
| 01 | eri | icute | Clostr | Lachnos  | Lachnospi | Lachnospira | ATTCCCTAGTGTAGCGGTGAAATGCGTAGATATTAGGAGGAACACCAGTGCGGAAGGCGGCTTACTGGACCG   |
| 2  | a   | s     | idia   | pirales  | raceae    | 36_group    | TAACTGACGTTGAGGCTCGAAAGCGTGGGGAGCAAACAGG                                   |
| A  |     |       |        |          |           |             |                                                                            |
| S  | Ba  |       |        |          |           |             | TACGTAGGGGAGCAAGCGTTGTCCGGATTTACTGGGTGTAAAGGGTGCGTAGGCGGCTTTGCAAGTCAGAAAGT |
| V  | ct  | Firm  |        |          |           |             | GAAATCCATGGGCTTAACCCATGAAGTCTTTGAACTGCAGAGCTTGAGTGGAGTAGAGGTAGGCGGAAT      |
| 09 | eri | icute | Clostr | Oscillos | Ruminoco  | Ruminococc  | TCCCGGTGTAGCGGTGAAATGCGTAGAGATCGGGAGGAACACCAGTGCGGAAGGCGGCCTGCTGGGCTCTA    |
| 3  | a   | s     | idia   | pirales  | ccaceae   | s           | ACTGACGCTGAGGCACGAAAGCGTGGGTAGCAAACAGG                                     |
| A  |     |       |        |          |           |             |                                                                            |
| S  | Ba  |       |        |          |           |             | TACGTAGGGGAGCAAGCGTTGTCCGGATTTACTGGGTGTAAAGGGTGCGTAGGCGGCTTTGCAAGTCAGAAAGT |
| V  | ct  | Firm  |        |          |           |             | GAAATCTATGGGCTTAACCCATAAACTGCTTTGAACTGCAGGGCTTGAGTGAAGTAGAGGTAGGCGGAAT     |
| 06 | eri | icute | Clostr | Oscillos | Ruminoco  | Ruminococc  | TCCCGGTGTAGCGGTGAAATGCGTAGAGATCGGGAGGAACACCAGTGCGGAAGGCGGCCTACTGGGCTTTA    |
| 4  | a   | s     | idia   | pirales  | ccaceae   | s           | ACTGACGCTGAGGCACGAAAGCGTGGGTAGCAAACAGG                                     |
| A  |     |       |        |          |           |             |                                                                            |
| S  | Ba  |       |        |          |           |             | TACGTAGGGGAGCAAGCGTTGTCCGGATTTACTGGGTGTAAAGGGTGCGTAGGCGGCTTTGCAAGTCAGATGT  |
| V  | ct  | Firm  |        |          |           |             | GAAATCTATGGGCTCAACCCATAAACTGCATTTGAACTGTAGAGCTTGAGTGAAGTAGAGGCAGGCGGAA     |
| 30 | eri | icute | Clostr | Oscillos | Ruminoco  | Ruminococc  | TTCCCGGTGTAGCGGTGAAATGCGTAGAGATGGGGAGGAACACCAGTGCGGAAGGCGGCCTGCTGGGCTTT    |
| 2  | a   | s     | idia   | pirales  | ccaceae   | us          | AACTGACGCTGAGGCACGAAAGCGTGGGTAGCAAACAGG                                    |
| A  |     |       |        |          |           |             |                                                                            |
| S  | Ba  |       |        |          |           |             | TACGTAGGGGAGCGAGCGTTGTCCGGATTTACTGGGTGTAAAGGGTGCGTAGGCGGCCGAGCAAGTCAGTTGT  |
| V  | ct  | Firm  |        |          |           |             | GAAAACCTATGGGCTTAACCCATAACGTGCAATTGAACTGTCCGGCTTGAGTGAAGTAGAGGTAGGCGGAA    |
| 49 | eri | icute | Clostr | Oscillos | Ruminoco  | CAG-352     | TTCCCGGTGTAGCGGTGAAATGCGTAGAGATCGGGAGGAACACCAGTGCGGAAGGCGGCCTACTGGGCTTT    |
| 9  | a   | s     | idia   | pirales  | ccaceae   |             | AACTGACGCTGAGGCACGAAAGCATGGGTAGCAAACAGG                                    |
| A  |     |       |        |          |           |             |                                                                            |
| S  | Ba  |       |        |          |           |             | TACGTAGGGGAGCGAGCGTTGTCCGGAATTACTGGGTGTAAAGGGTGCGTAGGCGGCCTTGCAAGTCAGGCGT  |
| V  | ct  | Firm  |        |          |           |             | GAAAACCATGGGCTCAACCCGTGGACTGCGTTTGAAGTGTGAGGCTTGAGTGAAGTAGAGGTAGGCGGAA     |
| 16 | eri | icute | Clostr | Oscillos | Ruminoco  | Ruminococc  | TTCCCGGTGTAGCGGTGAAATGCGTAGAGATCGGGAGGAACACCAGTGCGGAAGGCGGCCTACTGGGCTTT    |
| 0  | a   | s     | idia   | pirales  | ccaceae   | s           | AACTGACGCTGAGGCACGAAAGCATGGGTAGCAAACAGG                                    |
| A  |     |       |        |          |           |             |                                                                            |
| S  | Ba  |       |        |          |           |             | TACGTAGGGGAGCGAGCGTTGTCCGGATTTACTGGGTGTAAAGGGTGCGCAGGCGGCTCTGCAAGTCAGGCGT  |
| V  | ct  | Firm  |        |          |           |             | GAAAGCTAGGGGCTCAACCCCTAACTGCGCTTGAAGTGTGGAGCTTGAGTGAAGTAGAGGCAGGCGGAA      |
| 31 | eri | icute | Clostr | Oscillos | Ruminoco  | Ruminococc  | TTCCCGGTGTAGCGGTGAAATGCGTAGAGATCGGGAGGAACACCAGTGCGGAAGGCGGCCTGCTGGGCTTT    |
| 5  | a   | s     | idia   | pirales  | ccaceae   | s           | AACTGACGCTCAGGCACGAAAGCATGGGTAGCAAACAGG                                    |

|    |     |       |        |          |             |             |  |                                                                           |
|----|-----|-------|--------|----------|-------------|-------------|--|---------------------------------------------------------------------------|
| A  | S   | Ba    |        |          |             |             |  | TACGTAGGGAGCGAGCGTTGTCCGGAATTACTGGGTGTAAAGGGTGCGCAGGCGGCTCTGCAAGTCAGGCGT  |
|    | V   | ct    | Firm   |          |             | Ruminococ   |  | GAAAGCTAGGGGCTCAACCCCTAAATTGCGCTTGAAACTGTGGAGCTTGAGTGAAGTAGAGGCAGGCGGAA   |
| 35 | eri | icute | Clostr | Oscillos | Ruminoco    | aceae_Genu  |  | TTCCCGGTGTAGCGGTGAAATGCGTAGAGATCGGGAGGAACACCAGTGGCGAAGGCGGCCTGCTGGGCTTT   |
| 1  | a   | s     | idia   | pirales  | ccaceae     | s           |  | AACTGACGCTCAGGCACGAAAGCATGGGTAGCAAACAGG                                   |
| A  | S   | Ba    |        |          |             |             |  | TACGTAGGGAGCAAGCGTTGTCCGGAATTACTGGGTGTAAAGGGAGCGTAGGCGGGAGGATAAGTTGAATG   |
|    | V   | ct    | Firm   |          | Oscillospir | Oscillospir |  | TGAAATCTATGGGCTCAACCCATAGCTGCGTTCAAACTGTTCTTCTTGAGTGCAGAAGAGGGAAGCGGAAT   |
| 48 | eri | icute | Clostr | Oscillos | ales_Famil  | es_Family_G |  | TCCATGTGTAGCGGTGAAATGCGTAGAGATATGGAGGAACACCAGTGGCGAAGGCGGCCTTCTGGTCTGCA   |
| 7  | a   | s     | idia   | pirales  | y           | enus        |  | ACTGACACTGAGGCGCGAAAGCGTGGGGAGCAAACAGG                                    |
| A  | S   | Ba    |        |          |             |             |  | TACGTAGGGAGCAAGCGTTGTCCGGAATTACTGGGTGTAAAGGGAGCGTAGGCGGGAGGATAAGTTGAATG   |
|    | V   | ct    | Firm   |          |             | Ruminococ   |  | TGAAATCTATGGGCTCAACCCATAGCTGCGTTCAAACTGTTCTTCTTGAGTGAAGTAGAGGCAGGCGGAAT   |
| 07 | eri | icute | Clostr | Oscillos | Ruminoco    | aceae_Genu  |  | TCCTAGTGTAGCGGTGAAATGCGTAGATATTAGGAGGAACACCAGTGGCGAAGGCGGCCTGCTGGGCTTTA   |
| 8  | a   | s     | idia   | pirales  | ccaceae     | s           |  | CTGACGCTGAGGCTCGAAAGCGTGGGTAGCAAACAGG                                     |
| A  | S   | Ba    |        |          |             |             |  | TACGTAGGTGGCAAGCGTTGTCCGGAATTACTGGGTGTAAAGGGAGCGTAGGCGGGAAAAGCAAGTTGAATG  |
|    | V   | ct    | Firm   |          |             | Ruminococ   |  | TTTAAGGTACGGGCTCAACCTGTACAAGCGTTCAAACTGTTTTCTTGAGTGGAGTAGAGGTAAGCGGAAT    |
| 23 | eri | icute | Clostr | Oscillos | Ruminoco    | aceae_Genu  |  | TCCTAGTGTAGCGGTGAAATGCGTAAATATTAGGAGGAACACCAGTGGCGAAGGCGGCCTTACTGGGCTTTAA |
| 6  | a   | s     | idia   | pirales  | ccaceae     | s           |  | CTGACGCTGAGGCTCGAAAGCGTGGGTAGCAAACAGG                                     |
| A  | S   | Ba    |        |          |             |             |  | TACGTAGGTGGCAAGCGTTGTCCGGAATTACTGGGTGTAAAGGGAGCGTAGGCGGGAGGATAAGTTGGACG   |
|    | V   | ct    | Firm   |          |             | Ruminococ   |  | TATAAACTATCGGCTCAACCGGTAGAGGCGTTCAAACTGTCCTTCTTGAGTGAAGTAGAGGTAAGCGGAAT   |
| 35 | eri | icute | Clostr | Oscillos | Ruminoco    | aceae_Genu  |  | TCCTAGTGTAGCGGTGAAATGCGTAAATATTAGGAGGAACACCAGTGGCGAAGGCGGCCTTACTGGGCTTTAA |
| 3  | a   | s     | idia   | pirales  | ccaceae     | s           |  | CTGACGCTGAGGCTCGAAAGCGTGGGTAGCAAACAGG                                     |
| A  | S   | Ba    |        |          |             |             |  | TACGTAGGGAGCGAGCGTTGTCCGGAATTACTGGGTGTAAAGGGAGCGTAGGCGGGCGAGAAAAGTTGAATG  |
|    | V   | ct    | Firm   |          |             |             |  | TTAAATCTACCGGCTTAACTGGTAGCTGCGTTCAAACTTCTTGCTTGAGTGAAGTAGAGGCAGGCGGAATT   |
| 12 | eri | icute | Clostr | Oscillos | Ruminoco    | Anaerotrunc |  | CCTAGTGTAGCGGTGAAATGCGTAGATATTAGGAGGAACACCAGTGGCGAAGGCGGCCTGCTGGGCTTTAA   |
| 3  | a   | s     | idia   | pirales  | ccaceae     | us          |  | CTGACGCTGAGGCTCGAAAGCGTGGGGAGCAAACAGG                                     |
| A  | S   | Ba    |        |          |             |             |  | TACGTAGGGAGCGAGCGTTGTCCGGAATTACTGGGTGTAAAGGGAGCGTAGGCGGGCTTGTAAGTTGAATGT  |
|    | V   | ct    | Firm   |          |             | Anaerotrunc |  | CTAATCCACCGGCTCAACCGGTGATCGCGTTCAAACTGCAGGTCTTGAGTGAAGTAGAGGCAGGCGGAATT   |
| 19 | eri | icute | Clostr | Oscillos | Ruminoco    | us          |  | CCTAGTGTAGCGGTGAAATGCGTAGATATTAGGAGGAACACCAGTGGCGAAGGCGGCCTGCTGGGCTTTAA   |
| 0  | a   | s     | idia   | pirales  | ccaceae     |             |  | CTGACGCTGAGGCTCGAAAGCGTGGGGAGCAAACAGG                                     |
| A  | S   | Ba    |        |          |             |             |  | TACGTAGGGAGCGAGCGTTGTCCGGAATTACTGGGTGTAAAGGGAGCGTAGGCGGGCTTGTAAGTTGAATGT  |
|    | V   | ct    | Firm   |          |             | Anaerotrunc |  | CTAATCCACCGGCTCAACCGGTGATCGCGTTCAAACTGCAGGTCTTGAGTGAAGTAGAGGCAGGCGGAATT   |
| 47 | eri | icute | Clostr | Oscillos | Ruminoco    | us          |  | CCTAGTGTAGCGGTGAAATGCGTAGATATTAGGAGGAACACCAGTGGCGGAGGCGGCCTTACTGGACGGTAA  |
| 4  | a   | s     | idia   | pirales  | ccaceae     |             |  | CTGACGCTGAGGCTCGAAAGCGTGGGGAGCAAACAGG                                     |
|    | Ba  |       |        |          |             |             |  | TACGTAGGGAGCGAGCGTTGTCCGGAATTACTGGGTGTAAAGGGAGCGTAGGCGGGACTGCAAGTTGGGTG   |
| A  | ct  | Firm  |        |          |             | Ruminococ   |  | TCAAATCTACCGGCTCAACCGGTAGCCGCACTCAAACTGCAGTTCTTGAGTGAAGTAGAGGCAGGCGGAA    |
|    | S   | icute | Clostr | Oscillos | Ruminoco    | aceae_Genu  |  | TTCTAGTGTAGCGGTGAAATGCGTAGATATTAGGAGGAACACCAGTGGCGAAGGCGGCCTGCTGGGCTTTT   |
| V  | a   | s     | idia   | pirales  | ccaceae     | s           |  | ACTGACGCTGAGGCTCGAAAGTGTGGGGAGCAAACAGG                                    |

|    |     |       |        |          |          |              |  |                                                                           |
|----|-----|-------|--------|----------|----------|--------------|--|---------------------------------------------------------------------------|
| 26 |     |       |        |          |          |              |  |                                                                           |
| 9  |     |       |        |          |          |              |  |                                                                           |
| A  |     |       |        |          |          |              |  |                                                                           |
| S  | Ba  | Firm  |        |          |          | Ruminococ    |  | TACGTAGGGAGCAAGCGTTGTCCGGAATTACTGGGTGTAAAGGGAGCGTAGGCGGGGATGCAAGTTGGGTG   |
| V  | ct  | icute | Clostr | Oscillos | Ruminoco | aceae_Genu   |  | TCAAAACTACCGGCTCAACCGATAGTCGCACTCAAAACTGCAGCTCTTGAGTGAAGTAGAGGCAGGCGGAA   |
| 20 | eri | s     | idia   | pirales  | ccaceae  | s            |  | TTCTAGTGTAGCGGTGAAATGCGTAGATATTAGGAGGAACACCAGTGGCGAAGGCGGCCTGCTGGGCTTTT   |
| 0  | a   |       |        |          |          |              |  | ACTGACGCTGAGGCTCGAAAGTGTGGGGAGCAAACAGG                                    |
| A  |     |       |        |          |          |              |  |                                                                           |
| S  | Ba  | Firm  |        |          |          | Ruminococ    |  | TACGTAGGGAGCGAGCGTTGTCCGGAATTACTGGGTGTAAAGGGAGCGTAGGCGGGGATGCAAGTTGGGTG   |
| V  | ct  | icute | Clostr | Oscillos | Ruminoco | aceae_Genu   |  | TTAAATCTACCGGCTCAACTGGTAGTCGCACTCAAAACTGCAGCTCTTGAGTGAAGTAGAGGCAGGCGGAAT  |
| 13 | eri | s     | idia   | pirales  | ccaceae  | s            |  | TCCTAGTGTAGCGGTGAAATGCGTAGATATTAGGAGGAACACCAGTGGCGAAGGCGGCCTGCTGGGCTTTA   |
| 2  | a   |       |        |          |          |              |  | CTGACGCTGAGGCTCGAAAGTGTGGGGAGCAAACAGG                                     |
| A  |     |       |        |          |          |              |  |                                                                           |
| S  | Ba  | Firm  |        |          |          | Ruminococ    |  | TACGTAGGGAGCAAGCGTTGTCCGGAATTACTGGGTGTAAAGGGAGCGTAGGCGGGATGGCAAGTTGGGTG   |
| V  | ct  | icute | Clostr | Oscillos | Ruminoco | aceae_Genu   |  | TTAAATCTACCGGCTCAACTGGTAGTCGCACTCAAAACTGCTATTCTTGAGTGAAGTAGAGGCAGGCGGAAT  |
| 38 | eri | s     | idia   | pirales  | ccaceae  | s            |  | TCCTAGTGTAGCGGTGAAATGCGTAGATATTAGGAGGAACACCAGTGGCGAAGGCGGCCTGCTGGGCTTTA   |
| 1  | a   |       |        |          |          |              |  | CTGACGCTGAGGCTCGAAAGTGTGGGGAGCAAACAGG                                     |
| A  |     |       |        |          |          |              |  |                                                                           |
| S  | Ba  | Firm  |        |          |          |              |  | TACGTAGGGAGCGAGCGTTGTCCGGAATTACTGGGTGTAAAGGGAGCGTAGGCGGGGATGCAAGTTGGATG   |
| V  | ct  | icute | Clostr | Oscillos | Ruminoco | Anaerotrunc  |  | TTTAAACTATCGGCTCAACCGGTAATTGCAACCAAACTGCAACTCTTGAGTGAAGTAGAGGCAGGCGGAAT   |
| 24 | eri | s     | idia   | pirales  | ccaceae  | us           |  | TCCTAGTGTAGCGGTGAAATGCGTAGATATTAGGAGGAACACCAGTGGCGAAGGCGGCCTGCTGGGCTTTA   |
| 7  | a   |       |        |          |          |              |  | ACTGACGCTGAGGCTCGAAAGCGTGGGGAGCAAACAGG                                    |
| A  |     |       |        |          |          |              |  |                                                                           |
| S  | Ba  | Firm  |        |          |          | Ruminococ    |  | TACGTAGGTGGCGAGCGTTGTCCGGAATTACTGGGTGTAAAGGGAGCGTAGGCGGGATATTAAGTTGAATGT  |
| V  | ct  | icute | Clostr | Oscillos | Ruminoco | aceae_Genu   |  | ATAAACTACCGGCTTAACCGATAGAAGCGTTCAAAACTGATATTCTTGAGTGAAGTAGAGGCAGGCGGAAT   |
| 32 | eri | s     | idia   | pirales  | ccaceae  | s            |  | TCCTAGTGTAGCGGTGAAATGCGTAGATATTAGGAGGAACACCAGTGGCGAAGGCGGCCTGCTGGGCTTTA   |
| 2  | a   |       |        |          |          |              |  | ACTGACGCTGAGGCTCGAAAGCGTGGGTAGCAAACAGG                                    |
| A  |     |       |        |          |          |              |  |                                                                           |
| S  | Ba  | Firm  |        |          |          | Ruminococ    |  | TACGTAGGTGGCGAGCGTTGTCCGGAATTACTGGGTGTAAAGGGAGCGTAGGCGGGAGTGCAAGTTGAATG   |
| V  | ct  | icute | Clostr | Oscillos | Ruminoco | aceae_Genu   |  | TATAAACTATCGGCTCAACTGATAGAAGCGTTCAAAACTGCACCTCTTGAGTGAAGTAGAGGCAGGCGGAAT  |
| 32 | eri | s     | idia   | pirales  | ccaceae  | s            |  | TCCTAGTGTAGCGGTGAAATGCGTAGATATTAGGAGGAACACCAGTGGCGAAGGCGGCCTGCTGGGCTTTA   |
| 1  | a   |       |        |          |          |              |  | ACTGACGCTGAGGCTCGAAAGCGTGGGTAGCAAACAGG                                    |
| A  |     |       |        |          |          |              |  |                                                                           |
| S  | Ba  | Firm  |        |          |          |              |  | TACGTAGGTGGCAAGCGTTGTCCGGAATTACTGGGTGTAAAGGGAGCGTAGGCGGGAATGCAAGTTGAATG   |
| V  | ct  | icute | Clostr | Oscillos | Ruminoco | Negativibaci |  | TTTAAACTATGGGCTCAACCCATAGTCGCTTCAAAACTGCATTTCTTGAGTGGAGTAGAGGCAGGCGGAAT   |
| 33 | eri | s     | idia   | pirales  | ccaceae  | llus         |  | TCCTAGTGTAGCGGTGAAATGCGTAGATATTAGGAGGAACACCAGTGGCGAAGGCGGCCTGCTGGGCTCTA   |
| 4  | a   |       |        |          |          |              |  | ACTGACGCTGAGGCTCGAAAGCGTGGGTAGCAAACAGG                                    |
| A  |     |       |        |          |          |              |  |                                                                           |
| S  | Ba  | Firm  |        |          |          | Ruminococ    |  | TACGTAGGTGGCGAGCGTTGTCCGGAATTACTGGGTGTAAAGGGAGCGTAGGCGGGAGAGCAAGTCGACTG   |
| V  | ct  | icute | Clostr | Oscillos | Ruminoco | aceae_Genu   |  | TGAAATCTATGGGCTTAACCCATAGCTGCGATCGAAACTGTTTCATCTTGAGTGAAGTAGAGGCAGGCGGAAT |
| 23 | eri | s     | idia   | pirales  | ccaceae  | s            |  | TCCTAGTGTAGCGGTGAAATGCGTAAATATTAGGAGGAACACCAGTGGCGAAGGCGGCCTGCTGGGCTTTA   |
| 0  | a   |       |        |          |          |              |  | ACTGACGCTGAGGCTCGAAAGCGTGGGTAGCAAACAGG                                    |

|    |     |         |         |          |             |              |  |                                                                           |
|----|-----|---------|---------|----------|-------------|--------------|--|---------------------------------------------------------------------------|
| A  | S   | Ba      |         |          |             |              |  | AACGTAGGTCACAAGCGTTGTCCGGAATTACTGGGTGTAAAGGGAGCGCAGGCGGGAAGACAAGTTGGAAG   |
|    | V   | ct      | Firm    |          |             |              |  | TGAAATCTATGGGCTCAACCCATAAACTGCTTTCAAAACTGTTTTCTTGAGTAGTGCAGAGGTAGGCGGAAT  |
| 36 | eri | icute   | Clostr  | Oscillos | Ruminoco    | Faecalibacte |  | TCCCGGTGTAGCGGTGGAATGCGTAGATATCGGGAGGAACACCAGTGGCGAAGGCGGCCTACTGGGCACCA   |
| 6  | a   | s       | idia    | pirales  | ccaceae     | rium         |  | ACTGACGCTGAGGCTCGAAAGTGTGGGTAGCAAACAGG                                    |
| A  | S   | Ba      |         |          |             |              |  | AACGTAGGTCACAAGCGTTGTCCGGAATTACTGGGTGTAAAGGGAGCGCAGGCGGGAAGACAAGTTGGAAG   |
|    | V   | ct      | Firm    |          |             |              |  | TGAAATCCATGGGCTCAACCCATGAACCTGCTTTCAAAACTGTTTTCTTGAGTAGTGCAGAGGTAGGCGGAAT |
| 37 | eri | icute   | Clostr  | Oscillos | Ruminoco    | Faecalibacte |  | TCCCGGTGTAGCGGTGGAATGCGTAGATATCGGGAGGAACACCAGTGGCGAAGGCGGCCTACTGGGCACCA   |
| 3  | a   | s       | idia    | pirales  | ccaceae     | rium         |  | ACTGACGCTGAGGCTCGAAAGTGTGGGTAGCAAACAGG                                    |
| A  | S   | Ba      |         |          |             |              |  | AACGTAGGGTGCAAGCGTTGTCCGGAATTACTGGGTGTAAAGGGAGCGCAGGCGGGAAGACAAGTTGGAAG   |
|    | V   | ct      | Firm    |          |             |              |  | GTGAAAACCATGGGCTCAACCCATGAATTGCTTTCAAAACTGTTTTCTTGAGTAGTGCAGAGGTAGATGGA   |
| 47 | eri | icute   | Clostr  | Oscillos | Ruminoco    | Subdoligran  |  | ATTCCCGGTGTAGCGGTGGAATGCGTAGATATCGGGAGGAACACCAGTGGCGAAGGCGGTCTACTGGGCAC   |
| 3  | a   | s       | idia    | pirales  | ccaceae     | ulum         |  | CAACTGACGCTGAGGCTCGAAAGCATGGGTAGCAAACAGG                                  |
| A  | S   | Ba      |         |          |             |              |  | TACGTAGGTGGCAAGCGTTGTCCGGAATTACTGGGTGTAAAGGGAGCGTAGGCCGGGATGTCAAGTCAGAAG  |
|    | V   | ct      | Firm    |          |             |              |  | TGAAAATTATGGGCTCAACTCATAACCTGCTTTTGAAGTATTTCTTGAGTGAAGTAGAGGCAAGCGGAA     |
| 07 | eri | icute   | Clostr  | Oscillos | Ruminoco    | Ruminococc   |  | TTCTAGTGTAGCGGTGAAATGCGTAGATATTAGGAGGAACACCAGTGGCGAAGGCGGCTTGTCTGGGCTTTT  |
| 4  | a   | s       | idia    | pirales  | ccaceae     | s            |  | ACTGACGCTGAGGCTCGAAAGCGTGGGGAGCAAACAGG                                    |
| A  | S   | Ba      |         |          |             |              |  | TACGGAGGATGCGAGCGTTATCCGGATTTATTGGGTTTAAAGGGTGCCTAGGCGGTCCGTTAAGTCAGCGGT  |
|    | V   | ct      | Firm    |          |             |              |  | AAAATTGCGGGGCTCAACCCCGGGACTGCATTGGAAGTGGCATGCTGGAGTGCCGGAGGGGCAAGCGGAA    |
| 42 | eri | icute   | Clostr  | Lachnos  | Lachnospi   | Lachnospira  |  | TTCTAGTGTAGCGGTGAAATGCGTAGATATTAGGAGGAACACCAGTGGCGAAGGCGGCTTACTGGACCGT    |
| 7  | a   | s       | idia    | pirales  | raceae      | ceae_Genus   |  | AACTGACGTTGAGGCTCGAAAGCGTGGGGAGCAAACAGG                                   |
| A  | S   | Ba      |         |          |             |              |  | TACGGAGGATGCGAGCGTTATCCGGATTTATTGGGTTTAAAGGGTGCCTAGGCGGTCCGTTAAGTCAGCGGT  |
|    | V   | ct      | Firm    |          |             |              |  | AAAATTGCGGGGCTCAACCCCGGGGCTGCATTGGGAAGTGCCAGGCTGGAGTGCCGGAGAGGCAGGCGGA    |
| 50 | eri | icute   | Clostr  | Lachnos  | Lachnospi   | Lachnospira  |  | ATTCCTAGTGTAGCGGTGAAATGCGTAGATATTAGGAGGAACACCAGTGGCGAAGGCGGCTCACTGGACTG   |
| 9  | a   | s       | idia    | pirales  | raceae      | ceae_Genus   |  | TAACTGACGTTGAGGCTCGAAAGCGTGGGGAGCAAACAGG                                  |
| A  | S   | Ba      |         |          |             |              |  | TACGGAGGATGCGAGCGTTATCCGGATTTATTGGGTTTAAAGGGTGCCTAGGCGGGGAGCCAAGTCAGCGGT  |
|    | V   | ct      | Firm    |          |             |              |  | AAAATCGTGGGGCTCAACCCCATCCCGCCGTTGAAACTGTATTTCTTGAGTGCTGGAGAGGCAATCGGAATT  |
| 47 | eri | icute   | Clostr  | Oscillos | Oscillospir | Pseudoflavo  |  | CCGTGTGTAGCGGTGAAATGCGTAGATATACGGAGGAACACCAGTGGCGAAGGCGGATTGCTGGACAGTAA   |
| 6  | a   | s       | idia    | pirales  | aceae       | nifactor     |  | CTGACGCTGAGGCACGAAAGCGTGGGTAGCAAATAGG                                     |
| A  | S   | Ba      | Bact    | Bacter   | Bacteria_P  | Bacteria_Ph  |  | TACGGAGGATGCGAGCGTTATCCGGATTTATTGGGTTTAAAGGGTGCCTAGGCGGGCTTTTAAAGTCAGCGGT |
|    | V   | ct      | eria_Ph | ia_Ph    | hylum_Cl    | ylum_Class_  |  | AAAAATCCGGGGCCCAACCCCGGAAGTGCATTGGAAGTGTATTTCTAGAGTGTCCGAGAGGCAGACGGAA    |
| 57 | eri | Phyl    | ylum_   | m_Class  | ass_Order   | Order_Famil  |  | TTCTTGTGTAGCGGTGAAATGCGTAGATATAAGGAGGAACACCAGTGGCGAAGGCGGTCTGCTGGACAGC    |
| 7  | a   | um      | Class   | _Order   | _Family     | y_Genus      |  | AACTGACGGTGAGGCGCGAAAGCGTGGGGAGCGAACAGG                                   |
|    | Ba  | Bact    | Bacter  | Bacteria | Bacteria_P  | Bacteria_Ph  |  | TACGGAGGATGCGAGCGTTATCCGGATTTATTGGGTTTAAAGGGTGCCTAGGCGGGGAGCCAAGTCAGCGGT  |
| A  | ct  | eria_Ph | ia_Ph   | _Phylu   | hylum_Cl    | ylum_Class_  |  | AAAATTGAGAGGCTCAACCTCTTCGAGCCGTTGAAACTGGTTGACTTGAGTGCAGAAGAGGGAAGTGAAT    |
| S  | eri | Phyl    | ylum_   | m_Class  | ass_Order   | Order_Famil  |  | TCCATGTGTAGCGGTGAAATGCGTAGAGATATGGAAGAACACCAGTGGCGAAGGCGGCTCTCTGGTCTGCA   |
| V  | a   | um      | Class   | _Order   | _Family     | y_Genus      |  | ACTGACGCTGAGGCTCGAAAGCATGGGTAGCGAACAGG                                    |

|    |     |       |        |             |              |              |                                                                            |
|----|-----|-------|--------|-------------|--------------|--------------|----------------------------------------------------------------------------|
| 56 |     |       |        |             |              |              |                                                                            |
| 9  |     |       |        |             |              |              |                                                                            |
| A  |     |       |        |             |              |              |                                                                            |
| S  | Ba  | Firm  |        | Oscillospir | Oscillospir  |              | TACGGAGGATGCGAGCGTTATCCGGATTTATTGGGTTTAAAGGGTGCGCAGGCGGAGGTGCAAGTCAGCGGT   |
| V  | ct  | icute | Clostr | ales_Famil  | es_Family_G  |              | CAAAATTGCGGGGCTCAACCTCGTACTGCCGTTGAAACTGCAGAGCTTGAGTGGAGTAGAGGTAGGCGGAATT  |
| 58 | eri | s     | idia   | pirales     | y            |              | CCCGGTGTAGCGGTGAAATGCGTAGATATTCGGAGGAACACCAGTGGCGAAGGCGGCCTGCTGGGCTCTAA    |
| 8  | a   |       |        |             |              |              | CTGACGCTGAGGCACGAAAGCGTGGGTAGCAAACAGG                                      |
| A  |     |       |        |             |              |              |                                                                            |
| S  | Ba  |       |        |             |              |              | TACGGAGGATGCGAGCGTTATCCGGATTTATTGGGTTTAAAGGGTGCGTAGGCGGGCTTTTAAGTCAGCGGT   |
| V  | ct  | Bact  |        |             | Bacteroidale |              | AAAAATTGCGGGGCTCAACCCCGTCCGGCCGTTGAAACTGGGGGCTTGAGTGAAGTGGAGGTTGGCGGAAT    |
| 44 | eri | eroid | Bacter | Bacteroi    | Bacteroida   | s_Family_Ge  | TCCGAGTGTAGCGGTGAAATGCGTAGATATTCGGAGGAACACCAGTGGCGAAGGCGGCCAACTGGGCTTTA    |
| 2  | a   | ota   | oidia  | dales       | les_Family   | nus          | ACTGACGCTGAGGCTCGAAAGTGTGGGGAGCAAACAGG                                     |
| A  |     |       |        |             |              |              |                                                                            |
| S  | Ba  |       |        |             |              |              | TACGGAGGATGCGAGCGTTATCCGGATTTATTGGGTTTAAAGGGTGCGTAGGCGGATTTTAAAGTCAGCGGT   |
| V  | ct  | Bact  |        |             |              |              | AAAATGTCCGGGCTCAACCCGGGCCGCGTTGAAACTGGGGATCTTGAGTGGGCGAGAAGTATGCGGAAT      |
| 45 | eri | eroid | Bacter | Bacteroi    | Muribacul    | Muribaculac  | GCGTGGTGTAGCGGTGAAATGCGTAGATATTAGGGGGAACACCAGTGGCGAAGGCGGCCTGCTGGACTGCA    |
| 0  | a   | ota   | oidia  | dales       | aceae        | eae_Genus    | ACTGACGTTGAGGCTCGAAAGCGTGGGGATCGAACAGG                                     |
| A  |     |       |        |             |              |              |                                                                            |
| S  | Ba  |       |        |             |              |              | TACGGAGGATGCGAGCGTTATCCGGATTTATTGGGTTTAAAGGGTGGGCAGGCGGCGAGTTAAGTCAGCGGT   |
| V  | ct  | Bact  |        |             |              | Bacteroidale | AAAATTTGCGGGGCTCAACCCCGACAAGCCGTTGAAACTGGCTTGCTAGAGTGGGCGAGAAGTATGCGGAAT   |
| 41 | eri | eroid | Bacter | Bacteroi    | Bacteroida   | s_Family_Ge  | GCGTGGTGTAGCGGTGAAATGCGTAGATATTAGGAGGAACACCAGTGGCGAAGGCGGCCTACTGGACGATG    |
| 1  | a   | ota   | oidia  | dales       | les_Family   | nus          | ACTGACGCTGAGGCTCGAAAGCGTGGGGAGCAAACAGG                                     |
| A  |     |       |        |             |              |              |                                                                            |
| S  | Ba  |       |        |             |              |              | TACGGAGGATGCGAGCGTTATCCGGATTTATTAGGTTTAAAGGGTGCGCAGGCGGCGAGTTAAGTCAGCGGT   |
| V  | ct  | Bact  |        |             |              | Bacteroidale | AAAATTTGCGGGGCTCAACCCCGACAAGCCGTTGAAACTGGCTTGCTAGAGTGGGCGAGAAGTATGCGGAAT   |
| 43 | eri | eroid | Bacter | Bacteroi    | Bacteroida   | s_Family_Ge  | GCGTGGTGTAGCGGTGAAATGCGTAGATATTAGGAGGAACACCAGTGGCGAAGGCGGCCTGCTGGACTGCA    |
| 3  | a   | ota   | oidia  | dales       | les_Family   | nus          | ACTGACGTTGAGGCTCGAAGGCGTGGGGAGCAAACAGG                                     |
| A  |     |       |        |             |              |              |                                                                            |
| S  | Ba  |       |        |             |              |              | TACGGAGGATGCGAGCGTTATCCGGATTTATTGGGTTTAAAGGGTGCGCAGGCGGCGAGTTAAGTCAGCGGT   |
| V  | ct  | Firm  |        |             |              |              | AAAATTTGCGGGGCTCAACCCCGACAAGCCATTGAAACTGGCTTGCTAGAGTGGGCGAGAAGTATGCGGAAT   |
| 47 | eri | icute | Clostr | Lachnos     | Lachnospi    | Lachnospira  | TCCTAGTGTAGCGGTGAAATGCGTAGATATTAGGAGGAACACCAGTGGCGAAGGCGGCTTACTGGACTGCA    |
| 1  | a   | s     | idia   | pirales     | raceae       | ceae_Genus   | ACTGACGTTGAGGCTCGAAGGCGTGGGGAGCAAACAGG                                     |
| A  |     |       |        |             |              |              |                                                                            |
| S  | Ba  |       |        |             |              |              | TACGGAGGATGCGAGCGTTATCCGGATTTATTGGGTTTAAAGGGTGCGCAGGCGGAGGTGCAAGTCAGCGGT   |
| V  | ct  | Bact  |        |             |              | Bacteroidale | CAAAATTGCGGGGCTCAACCCCGTACTGCCGTTGAAACTGCATCCCTTGAGTGC GCGAGAAGTATGCGGAATG |
| 42 | eri | eroid | Bacter | Bacteroi    | Bacteroida   | s_Family_Ge  | CGTG GTGTAGCGGTGAAATGCGTAGATATTAGGAAGAACACCAGTGGCGAAGGCGGCCTGCTGGACTGCAA   |
| 5  | a   | ota   | oidia  | dales       | les_Family   | nus          | CTGACGTTGAGGCTCGAAGGCGTGGGGAGCAAACAGG                                      |
| A  |     |       |        |             |              |              |                                                                            |
| S  | Ba  |       |        |             |              |              | TACGGAGGATGCGAGCGTTATCCGGATTTATTGGGTTTAAAGGGTGCGTAGACGGAGCGTTAAGTCAGTGGT   |
| V  | ct  | Bact  |        |             |              | Bacteroidale | CAAAATTGAGGGGCTCAACCCCTTCCCGCCATTGAAACTGGCGCTCTTGAGTGGAAGAGAAGTATGCGGAATG  |
| 38 | eri | eroid | Bacter | Bacteroi    | Bacteroida   | s_Family_Ge  | CGTG GTGTAGCGGTGAAATGCGTAGATATTAGGAGGAACACCAGTGGCGAAGGCGGCCTGCTGGACGGTGA   |
| 3  | a   | ota   | oidia  | dales       | les_Family   | nus          | CTGACGCTGAGGCTCGAAAGCGTGGGGAGCAAACAGG                                      |

|    |     |       |        |          |             |               |     |                                                                           |
|----|-----|-------|--------|----------|-------------|---------------|-----|---------------------------------------------------------------------------|
| A  | S   | Ba    |        |          |             |               |     | TACGGAGGATGCGAGCGTTATCCGGATTTATTGGGTTTAAAGGGTGCGTAGGCGGGCTTTAAGTCAGCGGT   |
| V  | ct  | Bact  |        |          |             |               |     | AAAAATTCGGGGCTCAACCCCGTCCGGCCGTTGAAACTGGGGGCCTTGAGTGGGCGAGAAGAAGGCGGAAT   |
| 41 | eri | eroid | Bacter | Bacteroi | Muribacul   | Muribaculu    |     | GCGTGGTGTAGCGGTGAAATGCATAGATATTAGGAGGAACACCAGTGGCGAAGGCGGCTTCTGGACTGAA    |
| 0  | a   | ota   | oidia  | dales    | aceae       | m             |     | ACTGACGCTGAGGCTCGAAAGCGTGGGGAGCGAACAGG                                    |
| A  | S   | Ba    |        |          |             |               |     | TACGGAGGATGCGAGCGTTATCCGGATTTATTGGGTTTAAAGGGTGCGTAGGCGGGCTTTAAGTCAGCGGT   |
| V  | ct  | Bact  |        |          |             |               |     | AAAAATTCGGGGCTCAACCCCGTCCGGCCGTTGAAACTGGGGGCCTTGAGTGGGCGGGAAGAAGGCGGAAT   |
| 56 | eri | eroid | Bacter | Bacteroi | Bacteroida  | Bacteroidale  |     | GCGTGGTGTAGCGGTGAAATGCGTAGATATTAGGAAGAACACCAGTGGCGAAGGCGGCTTGCTGGACAGTA   |
| 3  | a   | ota   | oidia  | dales    | les_Family  | s_Family_Ge   | nus | ACTGACGTTGAGGCTCGAAAGCGTGGGGAGCAAACAGG                                    |
| A  | S   | Ba    |        |          |             |               |     | TACGTAGGGAGCAAGCGTTATCCGGATTTACTGGGTGTAAAGGGCGAGTAGGCGGGCTGGCAAGTTGGGAG   |
| V  | ct  | Firm  |        |          |             |               |     | TGAAATCCCGGGCTTAACCCCGGAACTGCTTTCAAACACTGCTGGTCTTGAGTGATGGAGAGGCAGGCGGAA  |
| 35 | eri | icute | Clostr | Oscillos | Butyricico  | Butyricicocc  |     | TTCCGTGTGTAGCGGTGAAATGCGTAGATATACGGAGGAACACCAGTGGCGAAGGCGGCTGCTGGACATT    |
| 9  | a   | s     | idia   | pirales  | ccaceae     | us            |     | AACTGACGCTGAGGAGCGAAAGCGTGGGGAGCAAACAGG                                   |
| A  | S   | Ba    |        |          |             |               |     | TACGTAGGGAGCAAGCGTTATCCGGATTTACTGGGTGTAAAGGGCGTGTAGGCGGGCTGCAAGTCAGAAG    |
| V  | ct  | Firm  |        |          |             |               |     | TGAAATCTGGGGCTTAACCCCAAACACTGCTTTTGAAACTGTGGGTCTTGAGTGATGGAGAGGCAGGCGGAA  |
| 06 | eri | icute | Clostr | Oscillos | Butyricico  | Butyricicocc  |     | TTCCAGTGTAGCGGTGAAATGCGTAGATATTGGGAGGAACACCAGTGGCGAAGGCGGCTGCTGGACATT     |
| 6  | a   | s     | idia   | pirales  | ccaceae     | us            |     | AACTGACGCTGAGGCGCGAAAGCGTGGGGAGCAAACAGG                                   |
| A  | S   | Ba    |        |          |             |               |     | TACGTAGGGAGCAAGCGTTATCCGGATTTACTGGGTGTAAAGGGCGTGTAGGCGGGCTGCAAGTCAGAAG    |
| V  | ct  | Firm  |        |          |             |               |     | TGAAATCTGGGGCTTAACCCCAAACACTGCTTTTGAAACTGTGGATCTTGAGTGATGGAGAGGCAGGCGGAA  |
| 23 | eri | icute | Clostr | Oscillos | Butyricico  | Butyricicocc  |     | TTCCAGTGTAGCGGTGAAATGCGTAGATATTGGGAGGAACACCAGTGGCGAAGGCGGCTGCTGGACATT     |
| 9  | a   | s     | idia   | pirales  | ccaceae     | us            |     | AACTGACGCTGAGGCGCGAAAGCGTGGGGAGCAAACAGG                                   |
| A  | S   | Ba    |        |          |             |               |     | TACGTAGGTGGCGAGCGTTGTCCGGAATTACTGGGTGTAAAGGGCGAGTAGGCGGACTGACAAGTCAGAAG   |
| V  | ct  | Firm  |        |          |             |               |     | TGAAATCTAGGGGCTCAACCCCTAAACACTGCTTTTGAAACTGTCCGCCTTGAGTGCCGGAGAGGAAAGCGGA |
| 50 | eri | icute | Clostr | Monogl   | Monoglob    | Monoglobus    |     | ATTCCTAGTGTAGCGGTGAAATGCGTAGATATTAGGAGGAACACCAGTGGCGAAGGCGGCTTTCTGGACGGT  |
| 5  | a   | s     | idia   | obales   | aceae       |               |     | AACTGACGCTGAGGCGCGAAAGCGTGGGGAGCAAACAGG                                   |
| A  | S   | Ba    |        |          |             |               |     | TACGTAGGGAGCGAGCGTTGTCCGATTTACTGGGTGTAAAGGGCGTGTAGGCGGAGCTGCAAGTCAGAAG    |
| V  | ct  | Firm  |        |          |             |               |     | TGAAATCTCCGGGCTCAACCCGGAACACTGCTTTTGAAACTGTAGCCCTTGAGTATCGGAGAGGCAGGCGGAA |
| 32 | eri | icute | Clostr | Oscillos | Oscillospir |               |     | TTCTAGTGTAGCGGTGAAATGCGTAGATATTAGGAGGAACACCAGTGGCGAAGGCGGCTGCTGGACGAC     |
| 5  | a   | s     | idia   | pirales  | aceae       | UCG-005       |     | AACTGACGCTGAGGCGCGAAAGCGTGGGGAGCAAACAGG                                   |
| A  | S   | Ba    |        |          |             |               |     | TACGTAGGGAGCGAGCGTTGTCCGATTTACTGGGTGTAAAGGGCGTGTAGGCGGAGCTGCAAGTCAGAAG    |
| V  | ct  | Firm  |        |          |             |               |     | TGTAATCTCCGGGCTCAACCCGGAACACTGCTTTTGAAACTGTAGCCCTTGAGTATCGGAGAGGCAGGCGGAA |
| 51 | eri | icute | Clostr | Oscillos | Oscillospir |               |     | TTCTAGTGTAGCGGTGAAATGCGCAGATATTAGGAGGAACACCAGTGGCGAAGGCGGCTTACTGGACAGT    |
| 3  | a   | s     | idia   | pirales  | aceae       | UCG-005       |     | AACTGACGTTGAGGCTCGAAAGCGTGGGGAGCAAACAGG                                   |
| A  | ct  | Firm  |        |          |             |               |     | TACGTAGGTGGCAAGCGTTATCCGATTTACTGGGTGTAAAGGGCGTGTAGGCGGGGAAGCAAGTCAGATG    |
| S  | eri | icute | Clostr | Oscillos | Oscillospir | Oscillospirac |     | TGAAAACACGGGCTCAACCTGTGCCTGCATTTGAAACTGTTTTCTTGAGTGCTGGAGAGGCAATCGGAA     |
| V  | a   | s     | idia   | pirales  | aceae       | eae_Genus     |     | TTCCGTGTGTAGCGGTGAAATGCGTAGATATACGGAGGAACACCAGTGGCGAAGGCGGATTGCTGGACAGT   |
|    |     |       |        |          |             |               |     | AACTGACGCTGAGGCGCGAAAGCGTGGGGAGCAAACAGG                                   |

|    |     |       |        |          |             |               |                                                                           |
|----|-----|-------|--------|----------|-------------|---------------|---------------------------------------------------------------------------|
| 11 |     |       |        |          |             |               |                                                                           |
| 5  |     |       |        |          |             |               |                                                                           |
| A  |     |       |        |          |             |               |                                                                           |
| S  | Ba  |       |        |          |             |               | TACGTAGGTGGCAAGCGTTATCCGGATTTACTGGGTGTAAAGGGCGTGTAGGCGGGGAGGCAAGTCAGATGT  |
| V  | ct  | Firm  |        |          |             |               | GAAAACCACGGGCTCAACCTGTGGCCTGCATTTGAAACTGTTTTCTTGAGTGCTGGAGAGGCAATCGGAAT   |
| 32 | eri | icute | Clostr | Oscillos | Oscillospir | Oscillospirac | TCCGTGTGTAGCGGTGAAATGCGTAGATATACGGAGGAACACCAGTGGCGAAGGCGGATTGCTGGACAGTA   |
| 3  | a   | s     | idia   | pirales  | aceae       | eae_Genus     | ACTGACGCTGAGGCGCGAAAGCGTGGGGAGCAAACAGG                                    |
| A  |     |       |        |          |             |               |                                                                           |
| S  | Ba  |       |        |          |             |               | TACGTAGGTGGCAAGCGTTATCCGGATTTATTGGGTGTAAAGGGCGTGTAGGCGGGAAAGCAAGTCAGATGT  |
| V  | ct  | Firm  |        |          |             |               | GAAAACCTCAGGGCTCAACCTGAGCCTGCATTTGAAACTGTTTTCTTGAGTGCTGGAGAGGCAATCGGAAT   |
| 41 | eri | icute | Clostr | Oscillos | Oscillospir | Oscillospirac | TCCGTGTGTAGCGGTGAAATGCGTAGATATATGGAAGAACACCAGTGGCGAAGGCGGCTCTCTGGTCTGCAA  |
| 2  | a   | s     | idia   | pirales  | aceae       | eae_Genus     | CTGACGCTGAGGCTCGAAAGCATGGGTAGCGAACAGG                                     |
| A  |     |       |        |          |             |               |                                                                           |
| S  | Ba  |       |        |          |             |               | TACGTAGGTGGCAAGCGTTATCCGGATTTATTGGGTGTAAAGGGCGTGTAGGCGGGAAAGCAAGTCAGATGT  |
| V  | ct  | Firm  |        |          |             |               | GAAAACCTCAGGGCTCAACCTGAGCCTGCATTTGAAACTGTTTTCTTGAGTGCTGGAGAGGCAATCGGAAT   |
| 15 | eri | icute | Clostr | Oscillos | Oscillospir | Oscillospirac | TCCGTGTGTAGCGGTGAAATGCGTAGATATACGGAGGAACACCAGTGGCGAAGGCGGATTGCTGGACAGTA   |
| 1  | a   | s     | idia   | pirales  | aceae       | eae_Genus     | ACTGACGCTGAGGCGCGAAAGCGTGGGGAGCAAACAGG                                    |
| A  |     |       |        |          |             |               |                                                                           |
| S  | Ba  |       |        |          |             |               | TACGTAGGTGGCAAGCGTTATCCGGATTTATTGGGTGTAAAGGGCGTGTAGGCGGGAGCGCAAGTCAGATGT  |
| V  | ct  | Firm  |        |          |             |               | GAAAACCTCAGGGCTCAACCTGAGCCTGCATTTGAAACTGTGTTTCTTGAGTGCTGGAGAGGCAATCGGAAT  |
| 14 | eri | icute | Clostr | Oscillos | Oscillospir | Oscillospirac | TCCGTGTGTAGCGGTGAAATGCGTAGATATACGGAGGAACACCAGTGGCGAAGGCGGATTGCTGGACAGTA   |
| 4  | a   | s     | idia   | pirales  | aceae       | eae_Genus     | ACTGACGCTGAGGCGCGAAAGCGTGGGGAGCAAACAGG                                    |
| A  |     |       |        |          |             |               |                                                                           |
| S  | Ba  |       |        |          |             |               | TACGTAGGTGGCAAGCGTTATCCGGATTTATTGGGTGTAAAGGGCGTGTAGGCGGGAAATGCAAGTCAGATGT |
| V  | ct  | Firm  |        |          |             |               | GAAAACCTCAGGGCTCAACCTGAGCCTGCATTTGAAACTGTATTTCTTGAGTGCTGGAGAGGCAATCGGAAT  |
| 05 | eri | icute | Clostr | Oscillos | Oscillospir | Oscillospirac | TCCGTGTGTAGCGGTGAAATGCGTAGATATACGGAGGAACACCAGTGGCGAAGGCGGATTGCTGGACAGTA   |
| 5  | a   | s     | idia   | pirales  | aceae       | eae_Genus     | ACTGACGCTGAGGCGCGAAAGCGTGGGGAGCAAACAGG                                    |
| A  |     |       |        |          |             |               |                                                                           |
| S  | Ba  |       |        |          |             |               | TACGTAGGTGGCAAGCGTTATCCGGATTTATTGGGTGTAAAGGGCGTGTAGGCGGGAAATGCAAGTCAGATGT |
| V  | ct  | Firm  |        |          |             |               | GAAAACCTATGGGCTCAACCCATAGCCTGCATTTGAAACTGTATTTCTTGAGTGCTGGAGAGGCAATCGGAAT |
| 13 | eri | icute | Clostr | Oscillos | Oscillospir | Oscillospirac | TCCGTGTGTAGCGGTGAAATGCGTAGATATACGGAGGAACACCAGTGGCGAAGGCGGATTGCTGGACAGTA   |
| 3  | a   | s     | idia   | pirales  | aceae       | eae_Genus     | ACTGACGCTGAGGCGCGAAAGCGTGGGGAGCAAACAGG                                    |
| A  |     |       |        |          |             |               |                                                                           |
| S  | Ba  |       |        |          |             |               | TACGTAGGTGGCGAGCGTTATCCGGATTTACTGGGTGTAAAGGGCGTGTAGGCGGGATTGCAAGTCAGATGT  |
| V  | ct  | Firm  |        |          |             |               | GAAAACCTATGGGCTCAACCCATAGCCTGCATTTGAAACTGTAGTTCTTGAGTGCTGGAGAGGCAATCGGAAT |
| 27 | eri | icute | Clostr | Oscillos | Oscillospir | Oscillospirac | TCCGTGTGTAGCGGTGAAATGCGTAGATATACGGAGGAACACCAGTGGCGAAGGCGGATTGCTGGACAGTA   |
| 9  | a   | s     | idia   | pirales  | aceae       | eae_Genus     | ACTGACGCTGAGGCGCGAAAGCGTGGGGAGCAAACAGG                                    |
| A  |     |       |        |          |             |               |                                                                           |
| S  | Ba  |       |        |          |             |               | TACGTAGGTGGCAAGCGTTATCCGGATTTACTGGGTGTAAAGGGCGTGTAGGCGGGAGTGCAAGTCAGATGT  |
| V  | ct  | Firm  |        |          |             |               | GAAAACCTATGGGCTCAACCCATAGCCTGCATTTGAAACTGTACTTCTTGAGTGCTGGAGAGGCAATCGGAAT |
| 18 | eri | icute | Clostr | Oscillos | Oscillospir | Intestinimon  | TCCGTGTGTAGCGGTGAAATGCGTAGATATACGGAGGAACACCAGTGGCGAAGGCGGATTGCTGGACAGTA   |
| 2  | a   | s     | idia   | pirales  | aceae       | as            | ACTGACGCTGAGGCGCGAAAGCGTGGGGAGCAAACAGG                                    |

|   |    |     |       |        |          |             |               |                                                                           |
|---|----|-----|-------|--------|----------|-------------|---------------|---------------------------------------------------------------------------|
| A | S  | Ba  |       |        |          |             |               | TACGTAGGTGGCAAGCGTTATCCGGATTTACTGGGTGTAAAGGGCGTGTAGGCGGGAGAGCAAGTCAGACG   |
| V | 11 | ct  | Firm  |        |          |             |               | TGAAATTCAGGGCTCAACCCTGGAAGTGC GTTTGAAACTGTTCTTCTTGAGTGATGGAGAGGCAGGCGGAA  |
|   | 9  | eri | icute | Clostr | Oscillos | Oscillospir | Colidextriba  | TTCCGTGTGTAGCGGTGAAATGCGTAGATATACGGAGGAACACCAGTGGCGAAGGCGGCCTGCTGGACATT   |
| A |    | a   | s     | idia   | pirales  | aceae       | cter          | AACTGACGCTGAGGCGCGAAAGCGTGGGGAGCAAACAGG                                   |
| S | 19 | Ba  |       |        |          |             |               | TACGTAGGTGGCAAGCGTTATCCGGATTTACTGGGTGTAAAGGGCGTGTAGGCGGGACTGCAAGTCAGATGT  |
| V | 1  | ct  | Firm  |        |          |             |               | GAAATTCAGGGCTCAACCCTGGAAGTGCATTTGAAACTGTAGTTCTTGAGTGATGGAGAGGCAGGCGGAAT   |
|   | 1  | eri | icute | Clostr | Oscillos | Oscillospir | Intestinimon  | TCCGTGTGTAGCGGTGAAATGCGTAGATATACGGAGGAACACCAGTGGCGAAGGCGGCCTGCTGGACATTA   |
| A |    | a   | s     | idia   | pirales  | aceae       | as            | ACTGACGCTGAGGCGCGAAAGCGTGGGGAGCAAACAGG                                    |
| S | 22 | Ba  |       |        |          |             |               | TACGTAGGGAGCAAGCGTTATCCGGATTTACTGGGTGTAAAGGGCGCGTAGGCGGGATGGCAAGTCAGATG   |
| V | 7  | ct  | Firm  |        |          |             |               | TGAAATCCAGGGGCTCAACCCCTGAACTGCATTTGAAACTGTCGTTCTTGAGTACTGGAGAGGTTGACGGAA  |
|   | 7  | eri | icute | Clostr | Oscillos | Oscillospir | NK4A214_g     | TTCTAGTGTAGCGGTGAAATGCGTAGATATTAGGAGGAACACCAGTGGCGAAGGCGGTCAACTGGACAGC    |
| A |    | a   | s     | idia   | pirales  | aceae       | roup          | AACTGACGCTGAGGCGCGAAAGCGTGGGGAGCAAACAGG                                   |
| S | 15 | Ba  |       |        |          |             |               | TACGTAGGTGGCAAGCGTTGTCCGGATTTACTGGGTGTAAAGGGCGTGCAGCCGGGAGTGCAAGTCAGATGT  |
| V | 2  | ct  | Firm  |        |          |             |               | GAAATCCC GCGGCTCAACCGCGGAAGTGCATTTGAAACTGTGCTTCTTGAGTGCTGGAGAGGCAGACGGAAT |
|   | 2  | eri | icute | Clostr | Oscillos | Oscillospir | Oscillospirac | TCCTAGTGTAGCGGTGAAATGCGTAGATATTAGGAGGAACACCAGTGGCGAAGGCGGTCTGCTGGACAGTA   |
| A |    | a   | s     | idia   | pirales  | aceae       | eae_Genus     | ACTGACGGTGAGGCGCGAAAGCGTGGGGAGCAAACAGG                                    |
| S | 09 | Ba  |       |        |          |             |               | TACGTAGGTGGCAAGCGTTGTCCGGATTTACTGGGTGTAAAGGGCGTGTAGCCGGGTTGACAAGTCAGATGT  |
| V | 9  | ct  | Firm  |        |          |             |               | GAAATCCTGCGGCTTAACCGCAGAACTGCATTTGAAACTGTTGATCTTGAGTACTGGAGAGGCAGACGGAAT  |
|   | 9  | eri | icute | Clostr | Oscillos | Oscillospir | Oscillospirac | TCCTAGTGTAGCGGTGAAATGCGTAGATATTAGGAGGAACACCAGTGGCGAAGGCGGTCTGCTGGACAGCA   |
| A |    | a   | s     | idia   | pirales  | aceae       | eae_Genus     | ACTGACGGTGAGGCGCGAAAGCGTGGGGAGCAAACAGG                                    |
| S | 17 | Ba  |       |        |          |             |               | TACGTAGGTGGCAAGCGTTGTCCGGATTTACTGGGTGTAAAGGGCGTGCAGCCGGGTTTATAAGTCAGATGT  |
| V | 4  | ct  | Firm  |        |          |             |               | GAAATCCC GCGGCTCAACCGCGGAAGTGCATTTGAAACTGTAGATCTTGAGTACTGGAGAGGCAGGCGGAA  |
|   | 4  | eri | icute | Clostr | Oscillos | Oscillospir | Oscillospirac | TTCTAGTGTAGCGGTGAAATGCGTAGATATTAGGAGGAACACCAGTGGCGAAGGCGGCCTGCTGGACAGC    |
| A |    | a   | s     | idia   | pirales  | aceae       | eae_Genus     | AACTGACGGTGAGGCGCGAAAGCGTGGGGAGCAAACAGG                                   |
| S | 44 | Ba  |       |        |          |             |               | TACGTAGGTGGCAAGCGTTGTCCGGATTTACTGGGTGTAAAGGGCGTGCAGCCGGGTTTATAAGTCAGATGT  |
| V | 6  | ct  | Firm  |        |          |             |               | GAAATCCC GCGGCTCAACCGCGGAAGTGCATTTGAAACTGTAGATCTTGAGTACTGGAGAGGCAGGCGGAA  |
|   | 6  | eri | icute | Clostr | Oscillos | Oscillospir | Oscillospirac | TTCTAGTGTAGCGGTGAAATGCGTAGATATTAGGAGGAACACCAGTGGCGAAGGCGGCCTGCTGGACTGC    |
| A |    | a   | s     | idia   | pirales  | aceae       | eae_Genus     | AACTGACGTTGAGGCTCGAAGGCGTGGGGAGCAAACAGG                                   |
| S | 20 | Ba  |       |        |          |             |               | TACGTAGGTGGCAAGCGTTGTCCGGATTTACTGGGTGTAAAGGGCGTGTAGCCGGGAAGGCAAGTCAGATGT  |
| V | 4  | ct  | Firm  |        |          |             |               | GAAATCCGGAGGCTCAACCTCCGAATTGCATTTGAAACTGTTTTTCTTGAGTACTGGAGAGGCAGACGGAAT  |
|   | 4  | eri | icute | Clostr | Oscillos | Oscillospir | Oscillospirac | TCCTTGTTAGCGGTGAAATGCGTAGATATAAGGAGGAACACCAGTGGCGAAGGCGGTCTGCTGGACAGCA    |
| A |    | a   | s     | idia   | pirales  | aceae       | eae_Genus     | ACTGACGGTGAGGCGCGAAAGCGTGGGGAGCAAACAGG                                    |
| S |    | Ba  |       |        |          |             |               | TACGTAGGTGGCAAGCGTTGTCCGGATTTACTGGGTGTAAAGGGCGTGTAGCCGGGCTGACAAGTCAGATGT  |
| V |    | ct  | Firm  |        |          |             |               | GAAATCCC GCGGCTCAACCGCGGAAGTGCATTTGAAACTGTGCGTCTTGAGTATCGGAGAGGCAGGCGGAA  |
|   |    | eri | icute | Clostr | Oscillos | Oscillospir | Oscillospirac | TTCTAGTGTAGCGGTGAAATGCGTAGATATTAGGAGGAACACCAGTGGCGAAGGCGGCCTGCTGGACGAC    |
| A |    | a   | s     | idia   | pirales  | aceae       | eae_Genus     | AACTGACGGTGAGGCGCGAAAGCGTGGGGAGCAAACAGG                                   |

|    |     |       |        |          |             |               |                                                                          |
|----|-----|-------|--------|----------|-------------|---------------|--------------------------------------------------------------------------|
| 27 |     |       |        |          |             |               |                                                                          |
| 3  |     |       |        |          |             |               |                                                                          |
| A  |     |       |        |          |             |               |                                                                          |
| S  | Ba  |       |        |          |             |               | TACGTAGGTGGCAAGCGTTGTCCGGATTTACTGGGTGTAAAGGGCGTGTAGCCGGGCTGACAAGTCAGATGT |
| V  | ct  | Firm  |        |          |             |               | GAAATCCCGTGGCTCAACCACGGAAGTGCATTTGAAACTGTCTGGTCTTGAGTATCGGAGAGGCAGGCGGAA |
| 42 | eri | icute | Clostr | Oscillos | Oscillospir | Oscillospirac | TTCTAGTGTAGCGGTGAAATGCGTAGATATTAGGAGGAACACCAGTGGCGAAGGCGGCCTGCTGGACGGT   |
| 1  | a   | s     | idia   | pirales  | aceae       | eae_Genus     | GACTGACGCTGAGGCTCGAAAGCGTGGGGAGCAAACAGG                                  |
| A  |     |       |        |          |             |               |                                                                          |
| S  | Ba  |       |        |          |             |               | TACGTAGGTGGCAAGCGTTGTCCGGATTTACTGGGTGTAAAGGGCGTGTAGCCGGGCTGACAAGTCAGATGT |
| V  | ct  | Firm  |        |          |             |               | GAAATCCGGGGGCTCAACCCCGAACTGCATTTGAAACTGTTGGTCTTGAGTATCGGAGAGGCAGGCGGAAT  |
| 11 | eri | icute | Clostr | Oscillos | Oscillospir | Oscillospirac | TCCTAGTGTAGCGGTGAAATGCGTAGATATTAGGAGGAACACCAGTGGCGAAGGCGGCCTGCTGGACGACA  |
| 0  | a   | s     | idia   | pirales  | aceae       | eae_Genus     | ACTGACGGTGAGGCGCGAAAGCGTGGGGAGCAAACAGG                                   |
| A  |     |       |        |          |             |               |                                                                          |
| S  | Ba  |       |        |          |             |               | TACGTAGGTGGCAAGCGTTGTCCGGATTTACTGGGTGTAAAGGGCGTGTAGCCGGGCTGACAAGTCAGATGT |
| V  | ct  | Firm  |        |          |             |               | GAAATCCGGGGGCTCAACCCCGACCTGCATTTGAAACTGTTGGTCTTGAGTATCGGAGAGGCAGGCGGAAT  |
| 16 | eri | icute | Clostr | Oscillos | Oscillospir | Oscillospirac | TCCTAGTGTAGCGGTGAAATGCGTAGATATTAGGAGGAACACCAGTGGCGAAGGCGGCCTGCTGGACGACA  |
| 8  | a   | s     | idia   | pirales  | aceae       | eae_Genus     | ACTGACGGTGAGGCGCGAAAGCGTGGGGAGCAAACAGG                                   |
| A  |     |       |        |          |             |               |                                                                          |
| S  | Ba  |       |        |          |             |               | TACGTAGGTGGCAAGCGTTGTCCGGATTTACTGGGTGTAAAGGGCGTGTAGCCGGGCGCGCAAGTCAGATGT |
| V  | ct  | Firm  |        |          |             |               | GAAATCCCAAGGCTCAACCTTGGAAGTGCATTTGAAACTGTTGGTCTTGAGTATCGGAGAGGCAGGCGGAAT |
| 27 | eri | icute | Clostr | Oscillos | Oscillospir | Oscillospirac | TCCTAGTGTAGCGGTGAAATGCGTAGATATTAGGAGGAACACCAGTGGCGAAGGCGGCCTGCTGGACGACA  |
| 1  | a   | s     | idia   | pirales  | aceae       | eae_Genus     | ACTGACGGTGAGGCGCGAAAGCGTGGGGAGCAAACAGG                                   |
| A  |     |       |        |          |             |               |                                                                          |
| S  | Ba  |       |        |          |             |               | TACGTAGGTGGCAAGCGTTGTCCGGATTTACTGGGTGTAAAGGGCGTGCAGCCGGGAAGACAAGTCAGATG  |
| V  | ct  | Firm  |        |          |             |               | TGAAATCCCGCGGCTCAACCGCGGAAGTGCATTTGAAACTGTTTTTCTTGAGTACCGGAGAGGTCATCGGAA |
| 05 | eri | icute | Clostr | Oscillos | Oscillospir |               | TTCTTGTGTAGCGGTGAAATGCGTAGATATAAGGAAGAACACCAGTGGCGAAGGCGGATGACTGGACGGC   |
| 9  | a   | s     | idia   | pirales  | aceae       | Oscillibacter | AACTGACGGTGAGGCGCGAAAGCGTGGGGAGCAAACAGG                                  |
| A  |     |       |        |          |             |               |                                                                          |
| S  | Ba  |       |        |          |             |               | TACGTAGGTGGCAAGCGTTGTCCGGATTTACTGGGTGTAAAGGGCGTGCAGCCGGGCTGACAAGTCAGATGT |
| V  | ct  | Firm  |        |          |             |               | GAAATCCCGCGGCTCAACCGCGGAAGTGCATTTGAAACTGTTAGTCTTGAGTACCGGAGAGGTCATCGGAAT |
| 14 | eri | icute | Clostr | Oscillos | Oscillospir | Oscillibacter | TCCTTGTGTAGCGGTGAAATGCGTAGATATAAGGAAGAACACCAGTGGCGAAGGCGGATGACTGGACGGCA  |
| 3  | a   | s     | idia   | pirales  | aceae       |               | ACTGACGGTGAGGCGCGAAAGCGTGGGGAGCAAACAGG                                   |
| A  |     |       |        |          |             |               |                                                                          |
| S  | Ba  |       |        |          |             |               | TACGTAGGTGGCAAGCGTTGTCCGGATTTACTGGGTGTAAAGGGCGTGCAGCCGGGAAGACAAGTCAGATG  |
| V  | ct  | Firm  |        |          |             |               | TGAAATCCCGCGGCTCAACCGCGGAAGTGCATTTGAAACTGTTTTTCTTGAGTATCGGAGAGGTAACCGGAA |
| 22 | eri | icute | Clostr | Oscillos | Oscillospir |               | TTCTAGTGTAGCGGTGAAATGCGTAGATATTAGGAAGAACACCAGTGGCGAAGGCGGTTACTGGACGAC    |
| 9  | a   | s     | idia   | pirales  | aceae       | Oscillibacter | AACTGACGGTGAGGCGCGAAAGCGTGGGGAGCAAACAGG                                  |
| A  |     |       |        |          |             |               |                                                                          |
| S  | Ba  |       |        |          |             |               | TACGTAGGTGGCAAGCGTTGTCCGGATTTACTGGGTGTAAAGGGCGTGCAGCCGGGAAGACAAGTCAGATG  |
| V  | ct  | Firm  |        |          |             |               | TGAAATCCCGCGGCTCAACCGCGGAAGTGCATTTGAAACTGTTTTTCTTGAGTATCGGAGAGGTAATCGGAA |
| 28 | eri | icute | Clostr | Oscillos | Oscillospir |               | TTCTAGTGTAGCGGTGAAATGCGTAGATATTAGGAAGAACACCAGTGGCGAAGGCGGATTACTGGACGAC   |
| 7  | a   | s     | idia   | pirales  | aceae       | Oscillibacter | AACTGACGGTGAGGCGCGAAAGCGTGGGGAGCAAACAGG                                  |

|        |                      |            |                 |                  |                        |                                                                                                                                                                                                                                                                   |
|--------|----------------------|------------|-----------------|------------------|------------------------|-------------------------------------------------------------------------------------------------------------------------------------------------------------------------------------------------------------------------------------------------------------------|
| ASV293 | Bacterial Firmicutes | Clostridia | Oscillospirales | Oscillospiraceae | UCG-003                | TACGTAGGTGGCAAGCGTTGTCCGGATTTACTGGGTGTAAAGGGCGTGCAGCCGGAGAGGCAAGTCAGATGTGAAATCCGCGGGCTCAACCCGCGAACTGCATTTGAAACTGCTTCCCTTGAGTATCGGAGAGGTAATCGGAAATTCCTAGTGTAGCGGTGAAATGCGTAGATATTAGGAAGAACACCAGTGGCGAAGGCGGATTACTGGACGACAACTGACGGTGAGGCGCGAAAAGCGTGGGGAGCAAACAGG   |
| ASV205 | Bacterial Firmicutes | Clostridia | Oscillospirales | Oscillospiraceae | Oscillibacter          | TACGTAGGTGGCAAGCGTTGTCCGGATTTACTGGGTGTAAAGGGCGTGCAGCCGGGACTGCAAGTCAGATGTGAAATCCGCGGGCTTAACCCGCGAACTGCATTTGAAACTGCGGATCTTGAGTACCGGAGAGGTTATCGGAATTCCTTGTGTAGCGGTGAAATGCGTAGATATAAGGAAGAACACCAGTGGCGAAGGCGGATAACTGGACGGCAACTGACGGTGAGGCGCGAAAAGCGTGGGGAGCAAACAGG    |
| ASV248 | Bacterial Firmicutes | Clostridia | Oscillospirales | Oscillospiraceae | Oscillibacter          | TACGTAGGTGGCAAGCGTTGTCCGGATTTACTGGGTGTAAAGGGCGTGCAGCCGGGCCGACAAGTCAGATGTGAAATCCGCGGGCTTAACCCGCGAACTGCATTTGAAACTATTGGTCTTGAGTACCGGAGAGGTCATCGGAATTCCTTGTGTAGCGGTGAAATGCGTAGATATAAGGAAGAACACCAGTGGCGAAGGCGGATGACTGGACGGCAACTGACGGTGAGGCGCGAAAAGCGTGGGGAGCAAACAGG    |
| ASV278 | Bacterial Firmicutes | Clostridia | Oscillospirales | Oscillospiraceae | Oscillibacter          | TACGTAGGTGGCAAGCGTTGTCCGGATTTACTGGGTGTAAAGGGCGTGCAGCCGGAGAGACAAGTCAGATGTGAAATCCGCAGGCTCAACCTGCGAACTGCATTTGAAACTGTTTCCCTTGAGTATCGGAGAGGTCATCGGAAATTCCTAGTGTAGCGGTGAAATGCGTAGATATTAGGAAGAACACCAGTGGCGAAGGCGGATGACTGGACGACAACTGACGGTGAGGCGCGAAAAGCGTGGGGAGCAAACAGG   |
| ASV231 | Bacterial Firmicutes | Clostridia | Oscillospirales | Oscillospiraceae | Oscillibacter          | TACGTAGGTGGCAAGCGTTGTCCGGATTTACTGGGTGTAAAGGGCGTGCAGCCGGAGAGACAAGTCAGATGTGAAATCCGCGGGCTCAACCCGCGAACTGCATTTGAAACTGTTTCCCTTGAGTATCGGAGAGGTCATCGGAAATTCCTAGTGTAGCGGTGAAATGCGTAGATATTAGGAAGAACACCAGTGGCGAAGGCGGATGACTGGACGACAACTGACGGTGAGGCGCGAAAAGCGTGGGGAGCAAACAGG   |
| ASV058 | Bacterial Firmicutes | Clostridia | Oscillospirales | Oscillospiraceae | Oscillibacter          | TACGTAGGTGGCAAGCGTTGTCCGGATTTACTGGGTGTAAAGGGCGTGCAGCCGGAGAGACAAGTCAGATGTGAAATCCACGGGCTCAACCCGTGAACCTGCATTTGAAACTGTTTCCCTTGAGTGTCCGAGAGGTAATCGGAAATTCCTTGTGTAGCGGTGAAATGCGTAGATATAAGGAAGAACACCAGTGGCGAAGGCGGATTACTGGACGATAACTGACGGTGAGGCGCGAAAAGCGTGGGGAGCAAACAGG  |
| ASV275 | Bacterial Firmicutes | Clostridia | Oscillospirales | Oscillospiraceae | Colidextribacter       | TACGTAGGTGGCGAGCGTTATCCGGATTTACTGGGTGTAAAGGGCGTGTAGGCGGGAGAGCAAGTCAGATGTGAAAACCTACAGGCTTAACCTGTAGCCTGCATTTGAAAACCTGTTCTTCTTGAGTGATGGAGAGGCAGGCCGAATTCCTAGTGTAGCGGTGAAATGCGTAGATATTAGGAGGAACACCAGTGGCGAAGGCGGCCTGCTGGACATTAACTGACGCTGAGGCGCGAAAAGCGTGGGGAGCAAACAGG |
| ASV405 | Bacterial Firmicutes | Clostridia | Oscillospirales | Oscillospiraceae | Colidextribacter       | TACGTAGGTGGCGAGCGTTATCCGGATTTACTGGGTGTAAAGGGCGTGTAGGCGGGAGAGCAAGTCAGATGTGAAAACCTACAGGCTTAACCTGTAGCCTGCATTTGAAAACCTGTTTTCTTGAGTGATGGAGAGGCAGGCCGAATTCCTAGTGTAGCGGTGAAATGCGTAGATATTAGGAGGAACACCAGTGGCGAAGGCGGCCTGCTGGACATTAACTGACGCTGAGGCGCGAAAAGCGTGGGGAGCAAACAGG  |
| ASV    | Bacterial Firmicutes | Clostridia | Oscillospirales | Oscillospiraceae | Oscillospiraceae Genus | TACGTAGGTGGCGAGCGTTATCCGGATTTACTGGGTGTAAAGGGCGTGTAGGCGGGATTGCAAGTCAGATGTGAAAACCTATGGGCTCAACCCATAGCCTGCATTTGAAAACCTGTAGTTCTTGAGTGCTGGAGAGGCAATCGGAATTCCTGTGTAGCGGTGAAATGCTTAGATATCAAGAAGAACCTCCGATTGCGAAGGCAGCCTGCTGGACTGTAACTGACGCTGATGCTCGAAAGTGTGGGTATCAAACAGG  |

|    |     |       |        |          |             |               |                                                                           |
|----|-----|-------|--------|----------|-------------|---------------|---------------------------------------------------------------------------|
| 44 |     |       |        |          |             |               |                                                                           |
| 9  |     |       |        |          |             |               |                                                                           |
| A  |     |       |        |          |             |               |                                                                           |
| S  | Ba  |       |        |          |             |               | TACGTAGGGAGCGAGCGTTATCCGGATTTACTGGGTGTAAAGGGCGTGTAGGCGGGATGGCAAGTCAGGCG   |
| V  | ct  | Firm  |        |          |             |               | TGAAAACCTATGGGCTCAACCCATAGCCTGCGTTTAAAAGTGTCTTCTGAGTGATGGAGAGGCAAGCGGAA   |
| 36 | eri | icute | Clostr | Oscillos | Oscillospir | Oscillospirac | TTCCGTGTGTAGCGGTGAAATGCGTAGATATACGGAGGAACACCAGTGGCGAAGGCGGCTTGCTGGACATT   |
| 8  | a   | s     | idia   | pirales  | aceae       | eae_Genus     | AACTGACGCTGAGGCGCGAAAGCGTGGGGAGCAAACAGG                                   |
| A  |     |       |        |          |             |               |                                                                           |
| S  | Ba  |       |        |          |             |               | TACGTAGGTGGCAAGCGTTATCCGGATTTACTGGGTGTAAAGGGCGTGTAGGCGGGACTGCAAGTCAGATGT  |
| V  | ct  | Firm  |        |          |             |               | GAAAACCATGGGCTCAACCCATGGCCTGCATTTGAAAGTGTAGTTCTTGAGTGATGGAGAGGCAGGCGGAAT  |
| 14 | eri | icute | Clostr | Oscillos | Oscillospir | Intestinimon  | TCCGTGTGTAGCGGTGAAATGCGTAGATATACGGAGGAACACCAGTGGCGAAGGCGGCCTGCTGGACATTA   |
| 7  | a   | s     | idia   | pirales  | aceae       | as            | ACTGACGCTGAGGCGCGAAAGCGTGGGGAGCAAACAGG                                    |
| A  |     |       |        |          |             |               |                                                                           |
| S  | Ba  |       |        |          |             |               | TACGTAGGTGGCAAGCGTTATCCGGATTTACTGGGTGTAAAGGGCGAGTAGGCGGGATTGCAAGTCAGATGT  |
| V  | ct  | Firm  |        |          |             |               | GAAAACCTATGGGCTCAACCGATAGAGTGCATTTGAAAGTGCAGTTCTTGAGTGATGGAGAGGCAGGCGGAA  |
| 12 | eri | icute | Clostr | Oscillos | Butyricico  |               | TTCCCGTGTAGCGGTGGAATGCGTAGATATCGGGAGGAACACCAGTGGCGAAGGCGGCCTGCTGGACATT    |
| 6  | a   | s     | idia   | pirales  | ccaceae     | UCG-009       | AACTGACGCTGAGGCGCGAAAGCGTGGGGAGCAAACAGG                                   |
| A  |     |       |        |          |             |               |                                                                           |
| S  | Ba  |       |        |          |             |               | TACGTAGGTGGCAAGCGTTATCCGGATTTACTGGGTGTAAAGGGCGTGTAGGCGGGACTGCAAGTCAGATGT  |
| V  | ct  | Firm  |        |          |             |               | GAAAACCATGGGCTCAACCTGTGGCCTGCATTTGAAAGTGTAGTTCTTGAGTACTGGAGAGGCAGACGGAAT  |
| 10 | eri | icute | Clostr | Oscillos | Oscillospir | Colidextriba  | TCCTAGTGTAGCGGTGAAATGCGTAGATATTAGGAGGAACACCAGTGGCGAAGGCGGTCTGCTGGACAGCA   |
| 9  | a   | s     | idia   | pirales  | aceae       | cter          | ACTGACGCTGAGGCGCGAAAGCGTGGGGAGCAAACAGG                                    |
| A  |     |       |        |          |             |               |                                                                           |
| S  | Ba  |       |        |          |             |               | TACGTAGGTGGCAAGCGTTATCCGGATTTACTGGGTGTAAAGGGCGTGTAGGCGGGAGTGCAAGTCAGATGT  |
| V  | ct  | Firm  |        |          |             |               | GAAAACCATGGGCTCAACCTGTGGCCTGCATTTGAAAGTGTACTTCTTGAGTACTGGAGAGGCAGACGGAAT  |
| 33 | eri | icute | Clostr | Oscillos | Oscillospir | Colidextriba  | TCCTAGTGTAGCGGTGAAATGCGTAGATATTAGGAGGAACACCAGTGGCGAAGGCGGTCTGCTGGACAGCA   |
| 1  | a   | s     | idia   | pirales  | aceae       | cter          | ACTGACGCTGAGGCGCGAAAGCGTGGGGAGCAAACAGG                                    |
| A  |     |       |        |          |             |               |                                                                           |
| S  | Ba  |       |        |          |             |               | TACGTAGGTGGCAAGCGTTATCCGGATTTACTGGGTGTAAAGGGCGTGTAGGCGGGGACGCAAGTCAGATGT  |
| V  | ct  | Firm  |        |          |             |               | GAAAACCATGGGCTCAACCTGTGGCCTGCATTTGAAAGTGTGTTTTCTTGAGTACTGGAGAGGCAGACGGAAT |
| 24 | eri | icute | Clostr | Oscillos | Oscillospir | Colidextriba  | TCCTAGTGTAGCGGTGAAATGCGTAGATATTAGGAGGAACACCAGTGGCGAAGGCGGTCTGCTGGACAGCA   |
| 3  | a   | s     | idia   | pirales  | aceae       | cter          | ACTGACGCTGAGGCGCGAAAGCGTGGGGAGCAAACAGG                                    |
| A  |     |       |        |          |             |               |                                                                           |
| S  | Ba  |       |        |          |             |               | TACGTAGGTGGCAAGCGTTATCCGGATTTACTGGGTGTAAAGGGCGTGTAGGCGGGAAAGCAAGTCAGATG   |
| V  | ct  | Firm  |        |          |             |               | TGAAAACCATGGGCTCAACCTGTGGCCTGCATTTGAAAGTGTGTTTTCTTGAGTACTGGAGAGGCAGACGGAA |
| 08 | eri | icute | Clostr | Oscillos | Oscillospir | Colidextriba  | TTCCCTAGTGTAGCGGTGAAATGCGTAGATATTAGGAGGAACACCAGTGGCGAAGGCGGTCTGCTGGACAGC  |
| 1  | a   | s     | idia   | pirales  | aceae       | cter          | AACTGACGCTGAGGCGCGAAAGCGTGGGGAGCAAACAGG                                   |
| A  |     |       |        |          |             |               |                                                                           |
| S  | Ba  |       |        |          |             |               | TACGTAGGTGGCAAGCGTTATCCGGATTTACTGGGTGTAAAGGGCGTGTAGGCGGGAAAGCAAGTCAGATG   |
| V  | ct  | Firm  |        |          |             |               | TGAAAACCATGGGCTCAACCTGTGGCCTGCATTTGAAAGTGTGTTTTCTTGAGTACTGGAGAGGCAGACGGAA |
| 37 | eri | icute | Clostr | Oscillos | Oscillospir | Colidextriba  | TTCCCTGTGTAGCGGTGAAATGCGTAGATATGAGGAGGAACACCAGTGGCGAAGGCGGTCTGCTGGACAGC   |
| 2  | a   | s     | idia   | pirales  | aceae       | cter          | AACTGACGCTGAGGCGCGAAAGCGTGGGGAGCAAACAGG                                   |

|    |     |       |        |          |             |              |  |                                                                            |
|----|-----|-------|--------|----------|-------------|--------------|--|----------------------------------------------------------------------------|
| A  | S   | Ba    |        |          |             |              |  | TACGTAGGTGGCAAGCGTTATCCGGATTTACTGGGTGTAAAGGGCGTGTAGGCGGGACTGCAAGTCAGATGT   |
|    | V   | ct    | Firm   |          |             |              |  | GAAAACCATGGGCTCAACCTGTGGCCTGCATTTGAAACTGTAGTTCTTGAGTACTGGAGAGGCAGACGGAAT   |
| 19 | eri | icute | Clostr | Oscillos | Oscillospir | Colidextriba |  | TCCTAGTGTAGCGGTGAAATGCGTAGATATTAGGAGGAACACCAGTGGCGAAGGCGGTCTGCTGGACAGCA    |
| 2  | a   | s     | idia   | pirales  | aceae       | cter         |  | ACTGACGCTGAGGCGCGAAAGCGTGGGGAGCAAACAGG                                     |
| A  | S   | Ba    |        |          |             |              |  | TACGTAGGGGGCAAGCGTTATCCGGATTTACTGGGTGTAAAGGGCGTGTAGGCGGGACTGCAAGTCAGATGT   |
|    | V   | ct    | Firm   |          |             |              |  | GAAAACCATGGGCTCAACCTGTGGCCTGCATTTGAAACTGTAGTTCTTGAGTACTGGAGAGGCAGACGGAAT   |
| 36 | eri | icute | Clostr | Oscillos | Oscillospir | Colidextriba |  | TCCTAGTGTAGCGGTGAAATGCGTAGATATTAGGAGGAACACCAGTGGCGAAGGCGCCTGCTGGACGGTG     |
| 9  | a   | s     | idia   | pirales  | aceae       | cter         |  | ACTGACGCTGAGGCTCGAAAGCGTGGGGAGCAAACAGG                                     |
| A  | S   | Ba    |        |          |             |              |  | TACGTAGGTGGCAAGCGTTATCCGGATTTACTGGGTGTAAAGGGCGTGTAGGCGGGACTGCAAGTCAGATGT   |
|    | V   | ct    | Firm   |          |             |              |  | GAAAACCATGGGCTCAACCTGTGGCCTGCATTTGAAACTGTAGTTCTTGAGTACTGGAGAGGCAGACGGAAT   |
| 33 | eri | icute | Clostr | Oscillos | Oscillospir | Colidextriba |  | TCCTAGTGTAGCGGTGAAATGCGTAGATATTAGGAGGAACACCAGTGGCGAAGGCGGTCTGCTGGACAGCA    |
| 0  | a   | s     | idia   | pirales  | aceae       | cter         |  | ACTGACGCTGAGGCGCGAAAGCGTGGGGAGCAAACAGG                                     |
| A  | S   | Ba    |        |          |             |              |  | TACGTATGGAGCAAGCGTTATCCGGATTTACTGGGCGTAAAGGGAGCGTAGGCGGCCTGCCAAGTCTGATGT   |
|    | V   | ct    | Firm   |          |             |              |  | GAAATACCGGGGCTCAACCCAGGCCTGCATTGGAAACTGTAAAGCTGGAGTACAGGAGAGGTAAGCGGA      |
| 53 | eri | icute | Clostr | Lachnos  | Lachnospira | Lachnospira  |  | ATTCCTAGTGTAGCGGTGAAATGCGTAGATATTAGGAGGAACACCAGTGGCGAAGGCAGCGTACCGGCGCC    |
| 4  | a   | s     | idia   | pirales  | raceae      | ceae_Genus   |  | AGACTGACGCTGAGGCACGAAAGCGTGGGGATCGAACAGG                                   |
| A  | S   | Ba    |        |          |             |              |  | TACGTATGGTGCAAGCGTTATCCGGATTTACTGGGCGTAAAGGGAGCGCAGGCGGCGGCCAAGTCTGATGT    |
|    | V   | ct    | Bact   |          |             |              |  | GAAACCCCGGGGCTCAACCCCGGGCATGCATTGGAAACTGGCAGACTTGAGTTGGCGAGAAGTACGCGGAA    |
| 56 | eri | eroid | Bacter | Bacteroi | Muribacul   | Muribaculac  |  | TGCGCGGTGTAGCGGTGAAATGCATAGATATCGCGCATAACTCCGATTGCGAAGGCAGCATGCCGGCTCCAC   |
| 2  | a   | ota   | oidia  | dales    | aceae       | eae_Genus    |  | ACTGACGCTGAGGCACGAAAGCGTGGGTATCGAACAGG                                     |
| A  | S   | Ba    |        |          |             |              |  | TACGTAGGGGGCAAGCGTTATCCGGATTTACTGGGTGTAAAGGGAGCGTAGACGGCGTGCCAAGTCTGATGT   |
|    | V   | ct    | Bact   |          |             |              |  | GAAAGGCCGGGGCTCAACCCCGGGACTGCATTGGAAACTGGCAGACTTGAGTTGGCGAGAAGTACGCGGAA    |
| 44 | eri | eroid | Bacter | Bacteroi | Muribacul   |              |  | TGCGCGGTATAGCGGTGAAATGCATAGATATCGCGCAGAACTCCGATTGCGAAGGCAGCGTACCGGCACCA    |
| 0  | a   | ota   | oidia  | dales    | aceae       | CAG-873      |  | GACTGACGCTGAGGCACGAAAGCGTGGGGATCGAACAGG                                    |
| A  | S   | Ba    |        |          |             |              |  | TACGTAGGGGGCAAGCGTTATCCGGATTTACTGGGTGTAAAGGGAGCGCAGGCGGCGCGTTAAGCCTGGTGT   |
|    | V   | ct    | Bact   |          |             |              |  | GAAAGCCCGCGGCCCAACCGCGGGACTGCATTGGAAACTGGCAGACTTGAGTTGGCGAGAAGTACGCGGA     |
| 55 | eri | eroid | Bacter | Bacteroi | Muribacul   |              |  | ATGCGCGGTGTAGCGGTGAAATGCATAGATATCGCGCAGAACTCCGATTGCGAAGGCAGCGTACCGGCGCT    |
| 4  | a   | ota   | oidia  | dales    | aceae       | CAG-873      |  | AGACTGACGCTGAGGCACGAAAGCGTGGGGATCGAACAGG                                   |
| A  | S   | Ba    |        |          |             |              |  | TACGGAGGATGCGAGCGTTATCCGGATTTATTGGGTTTAAAGGGTGCCTAGGTGGTGATTTAAGTCAGCGGT   |
|    | V   | ct    | Bact   |          |             |              |  | GAAAGTTTGTGGCTCAACCATAAAATTGCCGTTGAAACTGGGTTACTTGAGTGTGTTTGAAGTAGGCGGAAT   |
| 58 | eri | eroid | Bacter | Bacteroi | Tannerella  | Parabacteroi |  | GCGTGGTGTAGCGGTGAAATGCATAGATATCACGCAGAACTCCGATTGCGAAGGCAGCTTACTAAACCATA    |
| 9  | a   | ota   | oidia  | dales    | ceae        | des          |  | ACTGACACTGAAGCACGAAAGCGTGGGGATCAAACAGG                                     |
| A  | ct  | Bact  |        |          |             |              |  | TACGGAGGATCCGAGCGTTATCCGGATTTATTGGGTTTAAAGGGAGCGTAGATGGATGTTTAAAGTCAGTTGTG |
|    | S   | eri   | Bact   |          |             |              |  | AAAAGTTTGGCGCTCAACCGTAAAAATTGCAGTTGATACTGGATATCTTGAGTGCAGTTGAGGCAGGCGGAATT |
|    | V   | a     | eroid  | Bacteroi | Bacteroida  |              |  | CGTGGTGTAGCGGTGAAATGCTTAGATATCACGAAGAACTCCGATTGCGAAGGCAGCCTGCTAAGCTGCAA    |
|    |     | ota   | oidia  | dales    | ceae        | Bacteroides  |  | CTGACATTGAGGCTCGAAAGTGTGGGTATCAAACAGG                                      |

|    |     |       |        |          |            |             |                                                                           |
|----|-----|-------|--------|----------|------------|-------------|---------------------------------------------------------------------------|
| 34 |     |       |        |          |            |             |                                                                           |
| 3  |     |       |        |          |            |             |                                                                           |
| A  |     |       |        |          |            |             |                                                                           |
| S  | Ba  |       |        |          |            |             | TACGGAGGATCCGAGCGTTATCCGGATTTATTGGGTTTAAAGGGAGCGTAGATGGATGTTTAAGTCAGTTGTG |
| V  | ct  | Bact  |        |          |            |             | AAAGTTTGCGGCTCAACCGTAAAATTGCAGTTGATACTGGATGTCTTGAGTGCAGTTGAGGCAGGCGGAATT  |
| 36 | eri | eroid | Bacter | Bacteroi | Bacteroida |             | CGTGGTGTAGCGGTGAAATGCTTAGATATCACGAAGAAGCTCCGATTGCGAAGGCAGCCTGCTAAGCTGCAA  |
| 5  | a   | ota   | oidia  | dales    | ceae       | Bacteroides | CTGACATTGAGGCTCGAAAAGTGTGGGTATCAAACAGG                                    |
| A  |     |       |        |          |            |             |                                                                           |
| S  | Ba  |       |        |          |            |             | TACGGAGGATCCGAGCGTTATCCGGATTTATTGGGTTTAAAGGGAGCGTAGGCGGACGCTTAAGTCAGTTGT  |
| V  | ct  | Bact  |        |          |            |             | GAAAGTTTGCGGCTCAACCGTAAAATTGCAGTTGATACTGGGTGTCTTGAGTACAGTAGAGGCAGGCGGAAT  |
| 44 | eri | eroid | Bacter | Bacteroi | Bacteroida |             | TCGTGGTGTAGCGGTGAAATGCTTAGATATCACGAAGAAGCTCCGATTGCGAAGGCAGCCTGCTGGACTGTAA |
| 1  | a   | ota   | oidia  | dales    | ceae       | Bacteroides | CTGACGCTGATGCTCGAAAAGTGTGGGTATCAAACAGG                                    |
| A  |     |       |        |          |            |             |                                                                           |
| S  | Ba  |       |        |          |            |             | TACGGAGGATCCGAGCGTTATCCGGATTTATTGGGTTTAAAGGGAGCGTAGGCGGGTGTTAAGTCAGTTGT   |
| V  | ct  | Bact  |        |          |            |             | GAAAGTTTGCGGCTCAACCGTAAAATTGCAGTTGATACTGGCATCCTTGAGTACAGTAGAGGTAGGCGGAAT  |
| 01 | eri | eroid | Bacter | Bacteroi | Bacteroida |             | TCGTGGTGTAGCGGTGAAATGCTTAGATATCACGAAGAAGCTCCGATTGCGAAGGCAGCCTGCTGGACTGTAA |
| 1  | a   | ota   | oidia  | dales    | ceae       | Bacteroides | CTGACGCTGATGCTCGAAAAGTGTGGGTATCAAACAGG                                    |
| A  |     |       |        |          |            |             |                                                                           |
| S  | Ba  |       |        |          |            |             | TACGGAAGGTCCGGGCGTTATCCGGATTTATTGGGTTTAAAGGGAGCGTAGGCCGGAGATTAAGCGTGTGT   |
| V  | ct  | Bact  |        |          |            |             | GAAATGTAGACGCTCAACGTCTGCAGTCAGCGGAAGTGGTTTCCTTGAGTACGCACAAAGTGGGCGGAAT    |
| 43 | eri | eroid | Bacter | Bacteroi | Prevotella |             | TCGTGGTGTAGCGGTGAAATGCTTAGATATCACGAAGAAGCTCCGATTGCGAAGGCAGCTACTGGAGCGCA   |
| 0  | a   | ota   | oidia  | dales    | ceae       | Prevotella  | ACTGACGCTGAAGCTCGAAAGTGCGGGTATCGAACAGG                                    |
| A  |     |       |        |          |            |             |                                                                           |
| S  | Ba  |       |        |          |            |             | TACGGAAGGTCCGGGCGTTATCCGGATTTATTGGGTTTAAAGGGAGCGTAGGCCGGAGATTAAGCGTGTGT   |
| V  | ct  | Bact  |        |          |            |             | GAAATGTAGATGCTCAACATCTGAAGTGCAGCGGAAGTGGTTTCCTTGAGTACGCACAAAGTGGGCGGAAT   |
| 44 | eri | eroid | Bacter | Bacteroi | Prevotella |             | TCGTGGTGTAGCGGTGAAATGCTTAGATATCACGAAGAAGCTCCGATTGCGAAGGCAGCTACTGGAGCGCA   |
| 7  | a   | ota   | oidia  | dales    | ceae       | Prevotella  | ACTGACGCTGAAGCTCGAAAGTGCGGGTATCGAACAGG                                    |
| A  |     |       |        |          |            |             |                                                                           |
| S  | Ba  |       |        |          |            |             | TACGGAGGATTCAAGCGTTATCCGGATTTATTGGGTTTAAAGGGTGCCTAGGCCGTTTGATAAGTTAGAGGT  |
| V  | ct  | Bact  |        |          |            |             | GAAATCCCGGGGCTTAACTCCGGAAGTGCCTCTAATACTGTTAGACTAGAGAGTAGTTGCGGTAGGCGGAAT  |
| 49 | eri | eroid | Bacter | Bacteroi | Rikenellac |             | GTATGGTGTAGCGGTGAAATGCTTAGAGATCATACAGAACACCGATTGCGAAGGCAGCTTACCAAATATAT   |
| 4  | a   | ota   | oidia  | dales    | eae        | Alistipes   | CTGACGTTGAGGCACGAAAGCGTGGGGAGCAAACAGG                                     |
| A  |     |       |        |          |            |             |                                                                           |
| S  | Ba  |       |        |          |            |             | TACGGAGGATTCAAGCGTTATCCGGATTTATTGGGTTTAAAGGGTGCCTAGGCCGTTTGATAAGTTAGAGGT  |
| V  | ct  | Bact  |        |          |            |             | GAAATTTCCGGGCTCAACCTGAACGTGCCTCTAATACTGTTAGCTAGAGAGTAGTTGCGGTAGGCGGAAT    |
| 45 | eri | eroid | Bacter | Bacteroi | Rikenellac |             | GTATGGTGTAGCGGTGAAATGCTTAGAGATCATACAGAACACCGATTGCGAAGGCAGCTTACCAAATATAT   |
| 9  | a   | ota   | oidia  | dales    | eae        | Alistipes   | CTGACGTTGAGGCACGAAAGCGTGGGGAGCAAACAGG                                     |
| A  |     |       |        |          |            |             |                                                                           |
| S  | Ba  |       |        |          |            |             | TACGGAGGATCCAAGCGTTATCCGGATTTATTGGGTTTAAAGGGTGCCTAGGCCGTTTGATAAGTTAGAGGT  |
| V  | ct  | Bact  |        |          |            |             | GAAAGCTCGGGGCTTAACTCCGAGACTGCCTCTAATACTGTTAGCTAGAGAGTAGTTGCGGTAGGCGGAAT   |
| 47 | eri | eroid | Bacter | Bacteroi | Rikenellac |             | GTATGGTGTAGCGGTGAAATGCTTAGAGATCATACAGAACACCGATTGCGAAGGCAGCTTACCAAATATA    |
| 8  | a   | ota   | oidia  | dales    | eae        | Alistipes   | TCTGACGTTGAGGCACGAAAGCGTGGGGAGCAAACAGG                                    |

|    |    |     |       |        |          |           |             |                                                                              |
|----|----|-----|-------|--------|----------|-----------|-------------|------------------------------------------------------------------------------|
| A  | S  | Ba  |       |        |          |           |             | TACGGAGGATGCGAGCGTTATCCGGATTTATTGGGTTTAAAGGGTGCGCAGGCGGTCTGTAAAGTCAGCGGT     |
|    | V  | ct  | Bact  |        |          |           |             | CAAAGCCCCGGGGCTCAACCCCGGCCCGCCGTTGAAACTGGCAGTCTCGAGTTGGAGAGAAAGTATGCGGAAT    |
| 25 | 0  | eri | eroid | Bacter | Bacteroi | Muribacul | Muribaculac | GCGCGGTGTAGCGGTGAAATGCATAGATATCTCGCAGAACTCCGATTGCGAAGGCAGCATGCCGGCTCCAC      |
|    | A  | a   | ota   | oidia  | dales    | aceae     | eae_Genus   | ACTGACGCTGAGGCACGAAAGCGTGGGTATCGAACAGG                                       |
| A  | S  | Ba  |       |        |          |           |             | TACGGAGGATGCGAGCGTTATCCGGATTTATTGGGTTTAAAGGGTGCGCAGGCGGTCTGTAAAGTCAGCGGT     |
|    | V  | ct  | Bact  |        |          |           |             | CAAAGCCCCGGGGCTCAACCCCGGCCCGCCGTTGAAACTGGCAGTCTCGAGTTGGAGAGAAAGTATGCGGAAT    |
| 00 | 8  | eri | eroid | Bacter | Bacteroi | Muribacul | Muribaculac | GCGCGGTGTAGCGGTGAAATGCATAGATATCGCGCAGAACTCCGATTGCGAAGGCAGCATGCCGGCTCCAC      |
|    | A  | a   | ota   | oidia  | dales    | aceae     | eae_Genus   | ACTGACGCTGAGGCACGAAAGCGTGGGTATCGAACAGG                                       |
| S  | V  | Ba  |       |        |          |           |             | TACGGAGGATGCGAGCGTTATCCGGATTTATTGGGTTTAAAGGGTGCGTAGGCGGTCCGTAAAGTCAGCGGT     |
|    | 00 | ct  | Bact  |        |          |           |             | AAAATTGCGGGGCTCAACCCCGTCGAGCCGTTGAAACTGGCAGACTTGAGTTGGCGAGAAGTACGCGGAAT      |
| 2  | 2  | eri | eroid | Bacter | Bacteroi | Muribacul | Muribaculac | GCGCGGTGTAGCGGTGAAATGCATAGATATCGCGCAGAACTCCGATTGCGAAGGCAGCGTACCGGCGCCAG      |
|    | A  | a   | ota   | oidia  | dales    | aceae     | eae_Genus   | ACTGACGCTGAGGCACGAAAGCGTGGGGATCGAACAGG                                       |
| S  | V  | Ba  |       |        |          |           |             | TACGGAGGATGCGAGCGTTATCCGGATTTATTGGGTTTAAAGGGTGCGTAGGCGGTCCGTAAAGTCAGCGGT     |
|    | 17 | ct  | Bact  |        |          |           |             | AAAATTGCGGGGCTCAACCCCGTCGAGCCGTTGAAACTGGCAGACTTGAGTTGGCGAGAAGTACGCGGAAT      |
| 9  | 9  | eri | eroid | Bacter | Bacteroi | Muribacul | Muribaculac | GCGCGGTGTAGCGGTGAAATGCATAGATATCGCGCAGAACTCCGATTGCGAAGGCAGCGTACCGGCGCCAC      |
|    | A  | a   | ota   | oidia  | dales    | aceae     | eae_Genus   | ACTGACGCTGAGGCACGAAAGCGTGGGGATCGAACAGG                                       |
| S  | V  | Ba  |       |        |          |           |             | TACGGAGGATGCGAGCGTTATCCGGATTTATTGGGTTTAAAGGGTGCGTAGGCGGTCCGTAAAGTCAGCGGT     |
|    | 02 | ct  | Bact  |        |          |           |             | AAAATTGCGGGGCTCAACCCCGTCGAGCCGTTGAAACTGGCAGACTTGAGTTGGCGAGAAGTACGCGGAAT      |
| 2  | 2  | eri | eroid | Bacter | Bacteroi | Muribacul | Muribaculac | GCGCGGTGTAGCGGTGAAATGCATAGATATCGCGCAGAACTCCGATTGCGAAGGCAGCGTACCGGTGCCAC      |
|    | A  | a   | ota   | oidia  | dales    | aceae     | eae_Genus   | ACTGACGCTGAGGCACGAAAGCGTGGGGATCGAACAGG                                       |
| S  | V  | Ba  |       |        |          |           |             | TACGGAGGATGCGAGCGTTATCCGGATTTATTGGGTTTAAAGGGTGCGCAGGCGGCGAGTTAAGTCAGCGGT     |
|    | 01 | ct  | Bact  |        |          |           |             | AAAATTTGCGGGGCTCAACCCCGACAAGCCGTTGAAACTGGCTTGCTAGAGTGGGCGAGAAGTATGCGGAAT     |
| 4  | 4  | eri | eroid | Bacter | Bacteroi | Muribacul | Muribaculac | GCGTGGTGTAGCGGTGAAATGCATAGATATCACGCAGAACTCCGATTGCGAAGGCAGCATACCGGCGCCCA      |
|    | A  | a   | ota   | oidia  | dales    | aceae     | eae_Genus   | ACTGACGCTCAGGCACGAAAGCGTGGGTATCGAACAGG                                       |
| S  | V  | Ba  |       |        |          |           |             | TACGGAGGATGCGAGCGTTATCCGGATTTATTGGGTTTAAAGGGTGCGCAGGCGGAAGATCAAGTCAGCGGT     |
|    | 00 | ct  | Bact  |        |          |           |             | AAAATTGAGAGGCTCAACCTCTTCGAGCCGTTGAAACTGGTTTTCTTGAGTGAGCGAGAAGTATGCGGAATG     |
| 4  | 4  | eri | eroid | Bacter | Bacteroi | Muribacul | Muribaculac | CGTGGTGTAGCGGTGAAATGCATAGATATCACGCAGAACTCCGATTGCGAAGGCAGCATACCGGCGCTCAA      |
|    | A  | a   | ota   | oidia  | dales    | aceae     | eae_Genus   | CTGACGCTCATGCACGAAAGTGTGGGTATCGAACAGG                                        |
| S  | V  | Ba  |       |        |          |           |             | TACGGAGGATGCGAGCGTTATCCGGATTTATTGGGTTTAAAGGGTGCGCAGGCGGAGGTGCAAGTCAGCGGT     |
|    | 00 | ct  | Bact  |        |          |           |             | CAAATTGCGGGGCTCAACCCCGTACTGCCGTTGAAACTGCATCCCTTGAGTGCGCGAGAAGTATGCGGAATG     |
| 5  | 5  | eri | eroid | Bacter | Bacteroi | Muribacul | Muribaculac | CGTGGTGTAGCGGTGAAATGCATAGATATCACGCAGAACTCCGATTGCGAAGGCAGCATACCGGCGCGCAA      |
|    | A  | a   | ota   | oidia  | dales    | aceae     | eae_Genus   | CTGACGCTCATGCACGAAAGCGTGGGTATCGAACAGG                                        |
| S  | V  | Ba  |       |        |          |           |             | TACGGAGGATGCGAGCGTTATCCGGATTTATTGGGTTTAAAGGGTGCGTAGGCGGGAGCCAAGTCAGCGGT      |
|    | 00 | ct  | Bact  |        |          |           |             | AAAATCGTGGGGCTCAACCCCATCCCGCCGTTGAAACTGGTTTTCTTGAGTGAGTGGATGAGAAGTATGCGGAATG |
| 5  | 5  | eri | eroid | Bacter | Bacteroi | Muribacul | Muribaculac | CGTGGTGTAGCGGTGAAATGCATAGATATCACGCAGAACTCCGATTGCGAAGGCAGCATACCGGCATCCAA      |
|    | A  | a   | ota   | oidia  | dales    | aceae     | eae_Genus   | CTGACGCTGAAGCACGAAGGCGTGGGTATCAAACAGG                                        |

|    |     |       |        |          |            |              |  |                                                                           |
|----|-----|-------|--------|----------|------------|--------------|--|---------------------------------------------------------------------------|
| 00 |     |       |        |          |            |              |  |                                                                           |
| 6  |     |       |        |          |            |              |  |                                                                           |
| A  |     |       |        |          |            |              |  |                                                                           |
| S  | Ba  |       |        |          |            |              |  | TACGGAGGATGCGAGCGTTATCCGGATTTATTGGGTTTAAAGGGTGCGTAGGCGGAGCGTTAAGTCAGTGGT  |
| V  | ct  | Bact  |        |          |            |              |  | CAAATTGAGGGGCTCAACCCCTTCCCGCCATTGAAACTGGCGCTCTTGAGTGGAAGAGAAGTATGCGGAAT   |
| 04 | eri | eroid | Bacter | Bacteroi | Muribacul  | Muribaculac  |  | CGTGTTGTAGCGGTGAAATGCATAGATATCACGCAGAACCCCGATTGCGAAGGCAGCATGCCGGCTTCCTAC  |
| 6  | a   | ota   | oidia  | dales    | aceae      | eae_Genus    |  | TGACGCTGAAGCACGAAAGCGTGGGGATCGAACAGG                                      |
| A  |     |       |        |          |            |              |  |                                                                           |
| S  | Ba  |       |        |          |            |              |  | TACGGAGGATGCGAGCGTTATCCGGATTTATTGGGTTTAAAGGGTGCGTAGGCGGATCGTTAAGTCAGTGGT  |
| V  | ct  | Bact  |        |          |            |              |  | CAAATTGAGGGGCTCAACCCCTTCCCGCCATTGAAACTGGCGATCTTGAGTGGAAGAGAAGTATGCGGAAT   |
| 01 | eri | eroid | Bacter | Bacteroi | Muribacul  | Muribaculac  |  | GCGTGTTGTAGCGGTGAAATGCATAGATATCACGCAGAACCCCGATTGCGAAGGCAGCATGCCGGCTTCCT   |
| 8  | a   | ota   | oidia  | dales    | aceae      | eae_Genus    |  | ACTGACGCTGAAGCACGAAAGCGTGGGGATCGAACAGG                                    |
| A  |     |       |        |          |            |              |  |                                                                           |
| S  | Ba  |       |        |          |            |              |  | TACGGAGGATGCGAGCGTTATCCGGATTTATTGGGTTTAAAGGGTGCGTAGGCGGATTTTTAAGTCAGCGGT  |
| V  | ct  | Bact  |        |          |            |              |  | AAAATGTCCGGGCTCAACCCGGGCCGCGTTGAAACTGGGGATCTTGAGTGGGCGAGAAGTATGCGGAAT     |
| 03 | eri | eroid | Bacter | Bacteroi | Muribacul  | Muribaculac  |  | GCGTGTTGTAGCGGTGAAATGCATAGATATCACGCAGAACTCCGATTGCGAAGGCAGCATACCGGCGCCCC   |
| 8  | a   | ota   | oidia  | dales    | aceae      | eae_Genus    |  | ACTGACGCTGAGGCACGAAAGCGTGGGGATCGAACAGG                                    |
| A  |     |       |        |          |            |              |  |                                                                           |
| S  | Ba  |       |        |          |            |              |  | TACGGAGGATGCGAGCGTTATCCGGATTTATTGGGTTTAAAGGGTGCGTAGGCGGGCTTTTAAGTCAGCGGT  |
| V  | ct  | Bact  |        |          |            |              |  | AAAAATTCGGGGCTCAACCCCGTCCGGCCGTTGAAACTGGGGCCTTGAGTGGGCGAGAAGAAGGCGGAAT    |
| 00 | eri | eroid | Bacter | Bacteroi | Muribacul  | Muribaculac  |  | GCGTGTTGTAGCGGTGAAATGCATAGATATCACGCAGAACCCCGATTGCGAAGGCAGCCTTCCGGCGCCCT   |
| 7  | a   | ota   | oidia  | dales    | aceae      | eae_Genus    |  | ACTGACGCTGAGGCACGAAAGTGCGGGGATCGAACAGG                                    |
| A  |     |       |        |          |            |              |  |                                                                           |
| S  | Ba  |       |        |          |            |              |  | TACGTAGGTGGCAAGCGTTGTCCGGATTTATTGGGCGTAAAGTGAGCGCAGGCGGTTTCTTAAGTCTGATGTG |
| V  | ct  | Bact  |        |          |            | Bacteroidale |  | AAAGCCCCCGGCTCAACCGGGGAGGGTCATTGAAACTGGTTTTCTTGAGTGGATGAGAAGTATGCGGAAT    |
| 50 | eri | eroid | Bacter | Bacteroi | Bacteroida | s_Family_Ge  |  | GCGTGTTGTAGCGGTGAAATGCATAGATATCACGCAGAACTCCGATTGCGAAGGCAGCATACCGGCATCCA   |
| 2  | a   | ota   | oidia  | dales    | les_Family | nus          |  | ACTGACGCTGAAGCACGAAGGCGTGGGTATCAAACAGG                                    |
| A  |     |       |        |          |            |              |  |                                                                           |
| S  | Ba  |       |        |          |            |              |  | TACGTAGGGAGCAAGCGTTATCCGGATTTATTGGGTGTAAAGGGTGCGTAGACGGGAAGGCAAGTTAGTTGT  |
| V  | ct  | Firm  |        |          |            |              |  | GAAATCCCTCGGCTTAAGTGAAGAACTGCAACTAAACTATCTTTCTTGAGTGCTGGAGAGGAAAGTGAAT    |
| 39 | eri | icute |        |          |            |              |  | TCCTAGTGTAGCGGTGAAATGCGTAGATATCACGCAGAACTCCGATTGCGAAGGCAGCATACCGGCGCTCA   |
| 9  | a   | s     | Clostr | Clostrid | Clostridia | Clostridia_O |  | ATTGACGCTCATGCACGAAAGTGTGGGTATCAAACAGG                                    |
| A  |     |       | idia   | ia_Orde  | _Order_Fa  | rd_Family    |  |                                                                           |
| S  | Ba  |       |        |          |            |              |  | TACGTAGGGAGCGAGCGTTATCCGGAATTATTGGGTGTAAAGGGTGCGTAGACGGGAAAGCAAGTTAGTTGT  |
| V  | ct  | Firm  |        |          |            |              |  | GAAATCCCTCGGCTTAAGTGAAGAACTGCAACTAAACTACTTTTCTTGAGTGCAGGAGAGGTAAGTGAAT    |
| 49 | eri | icute |        |          |            |              |  | TCCTAGTGTAGCGGTGAAATGCGTAGATATCACGCAGAACTCCGATTGCGAAGGCAGCATACCGGCGCTCA   |
| 0  | a   | s     | Clostr | ia_UCG   | 014_Famil  | 014_Family_  |  | ACTGACGCTCATGCACGAAAGTGTGGGTATCGAACAGG                                    |
| A  |     |       | idia   | -014     | y          | Genus        |  |                                                                           |
| S  | Ba  | Bact  | Bacter | Bacteria | Bacteria_P | Bacteria_Ph  |  | TACGTAGGGAGCAAGCGTTGTTCGGAATGACTGGGCGTAAAGGGTGCGTAGGCGGTTGTACAAGTTAGAAG   |
| V  | ct  | eria_ | ia_Ph  | _Phylu   | hylum_Cl   | ylum_Class   |  | TGAAATACCCAGGGCTTAAGTGGGTGCTGCTTCTAAACTGTATGACTTGAGTGCAGAAGAGGGAAGTGAAG   |
| 60 | eri | Phyl  | ylum_  | m_Class  | ass_Order  | Order_Famil  |  | ATTCCATGTGTAGCGGTGAAATGCGTAGATATCGGCAGAACTCCGATTGCGAAGGCAGCGTACCGGTGCCA   |
| 5  | a   | um    | Class  | _Order   | _Family    | y_Genus      |  | CACTGACGCTCATGCACGAAAGCGTGGGTATCGAACAGG                                   |

|    |     |        |        |          |              |              |  |                                                                              |
|----|-----|--------|--------|----------|--------------|--------------|--|------------------------------------------------------------------------------|
| A  | S   | Ba     |        |          |              |              |  | TACGTAGGAGGCAAGCGTTATCCGGAATGACTGGGCGTAAAGGGTGCCTAGGTGGTTTGACAAGTTAGTAG      |
|    | V   | ct     | Bact   |          | Porphyro     | Porphyromo   |  | CGCAACTCCGGAGCTTAACCTTCGGAAGCTACTACTAAAAGCTGTTGGAGCTTGAAGTGCAGGAGGGGCAATCGGA |
| 55 | eri | eroid  | Bacter | Bacteroi | monadace     | nadaceae_G   |  | ATTCCATGTGTAGCGGTGGAATGCATAGATATCACGCAGAACTCCGATTGCGAAGGCAGCATACCGGCGCG      |
| 0  | a   | ota    | oidia  | dales    | ae           | enus         |  | CAACTGACGCTCATGCACGAAAGCGTGGGTATCGAACAGG                                     |
| A  | S   | Ba     |        |          |              |              |  | TACGTAGGTGGCGAGCGTTGTCCGGAATTACTGGGTGTAAAGGGAGCGTAGGCGGGAGAGCAAGTCGACTG      |
|    | V   | ct     | Firm   |          |              | Ruminococc   |  | TGAAATCTATGGGCTTAACCCATAGCTGCGATCGAAACTGTTTCATCTTGAGTGAAGTAGAGGCAGGCGGAAT    |
| 55 | eri | icute  | Clostr | Oscillos | Ruminoco     | aceae_Genu   |  | TCCTAGTGTAGCGGTGAAATGCATAGATATCGCGCAGAACTCCGATTGCGAAGGCAGCATGCCGGCTCCACA     |
| 7  | a   | s      | idia   | pirales  | ccaceae      | s            |  | CTGACGCTGAGGCACGAAAGCGTGGGTATCGAACAGG                                        |
| A  | S   | Ba     |        |          |              |              |  | TACGTAGGGAGCGAGCGTTGTCCGGAATTACTGGGTGTAAAGGGAGCGTAGGCGGGCGAGAAAGTTGAATG      |
|    | V   | ct     | Firm   |          |              | Anaerotrunc  |  | TTAAATCTACCGGCTTAACCTGGTAGCAGCGTTCAAACTTCTTGTCTTGAGTGAAGTAGAGGCAGGCGGAAT     |
| 55 | eri | icute  | Clostr | Oscillos | Ruminoco     | us           |  | TCCTAGTGTAGCGGTGAAATGCATAGATATCGCGCAGAACTCCGATTGCGAAGGCAGCGTACCGGCGCCAG      |
| 9  | a   | s      | idia   | pirales  | ccaceae      |              |  | ACTGACGCTGAGGCACGAAAGCGTGGGGATCGAACAGG                                       |
| A  | S   | Ba     |        |          |              |              |  | TACGTAGGTGGCAAGCGTTGTCCGGAATTACTGGGTGTAAAGGGAGCGCAGGCGGGGAAGCCAAGTCAGCTG     |
|    | V   | ct     | Bact   |          | Bacteroidale | Bacteroidale |  | TGAAAAGCTACGGGCTTAACCTGTAGACTGCAGTTGAAAGCTGGTTTTCTTGAGTGAAGTGGAGGTTGGCGGAA   |
| 50 | eri | eroid  | Bacter | Bacteroi | les_Family   | s_Family_Ge  |  | TTCCGAGTGTAGCGGTGAAATGCATAGATATCACGCAGAACTCCGATTGCGAAGGCAGCATACCGGCGCGC      |
| 4  | a   | ota    | oidia  | dales    |              | enus         |  | AACTGACGCTCATGCACGAAAGCGTGGGTATCGAACAGG                                      |
| A  | S   | Ba     |        |          |              |              |  | TACGGAGGATGCGAGCGTTGTCCGGAATTACTGGGTGTAAAGGGAGCGCAGGCGGGGAAGCCAAGTCAGCTG     |
|    | V   | ct     | Bact   |          | Bacteroidale | Bacteroidale |  | TGAAAAGCTACGGGCTTAACCTGTAGACTGCAGTTGAAAGCTGGTTTTCTTGAGTGAAGTAGAGGTTGGCGGAA   |
| 51 | eri | eroid  | Bacter | Bacteroi | les_Family   | s_Family_Ge  |  | TTCTGTGTAGCGGTGAAATGCTTAGATATCAGGAAGAACTCCGATTGCGAAGGCAGCCTGCTGGACTGTA       |
| 6  | a   | ota    | oidia  | dales    |              | enus         |  | ACTGACGCTGATGCTCGAAAGTGTGGGTATCAAACAGG                                       |
| A  | S   | Ba     |        |          |              |              |  | TACGTAGGTGGCAAGCGTTGTCCGGAATTACTGGGTGTAAAGGGAGCGCAGGCGGGGAAGCCAAGTCAGCTG     |
|    | V   | ct     | Firm   |          | Oscillospir  | Oscillospir  |  | TGAAAAGCTACGGGCTTAACCTGTAGACTGCAGTTGAAAGCTGGTTTTCTTGAGTGAAGTAGAGGTTGGCGGAA   |
| 03 | eri | icute  | Clostr | Oscillos | ales_Famil   | es_Family_G  |  | TTCCGAGTGTAGCGGTGAAATGCGTAGATATTCGGAGGAACACCGGTGGCGAAGGCGGCCAACTGGGCTTT      |
| 5  | a   | s      | idia   | pirales  | y            | enus         |  | AACTGACGCTGAGGCTCGAAAGTGTGGGGAGCAAAACAGG                                     |
| A  | S   | Ba     |        |          |              |              |  | TACGTAGGGAGCAAGCGTTATCCGGATTTACTGGGTGTAAAGGGCGTGTAGGCGGGCTGCAAGTCAGAAG       |
|    | V   | ct     | Firm   |          | Butyricico   | Butyricicocc |  | TGAAATCTGGGGGCTTAACCCCCAAAGCTGCTTTTGAAAGTGTGGGTCTTGAGTGTAGGAGAGGCAGGCGGAA    |
| 50 | eri | icute  | Clostr | Oscillos | ccaceae      | aceae_Genu   |  | TTCCAGTGTAGCGGTGAAATGCATAGATATCGCGCAGAACTCCGATTGCGAAGGCAGCGTACCGGCGCCA       |
| 7  | a   | s      | idia   | pirales  |              | s            |  | GACTGACGCTGAGGCACGAAAGCGTGGGGATCGAACAGG                                      |
| A  | S   | Ba     |        |          |              |              |  | TACGTATGGAGCAAGCGTTGTCCGGATTTACTGGGTGTAAAGGGTGCCTAGGCGGCTTTGCAAGTCAGAAGT     |
|    | V   | ct     | Firm   |          | Ruminococc   | Ruminococc   |  | GAAATCCATGGGCTTAACCCATGAAGTGTCTTTTGAAAGTGCAGAGCTTGAGTGGAGTAGAGGTAGGCGGAAT    |
| 45 | eri | icute  | Clostr | Oscillos | ccaceae      | aceae_Genu   |  | TCCCGGTGTAGCGGTGAAATGCGTAGATATCACGCAGAACCCCGATTGCGAAGGCAGCCTTCCGGCGCCCTA     |
| 4  | a   | s      | idia   | pirales  |              | s            |  | CTGACGCTGAGGCACGAAAGTGCGGGGATCGAACAGG                                        |
| A  | Ba  | Bact   | Bacter | Bacteria | Bacteria_Ph  | Bacteria_Ph  |  | TACGTATGGGGCAAGCGTTATCCGGATTTACTGGGTGTAAAGGGTGCCTAGGCGGCTTTGCAAGTCAGAAGT     |
|    | ct  | eria_P | ia_Ph  | _Phylu   | ylum_Cl      | ylum_Class_  |  | GAAATCTATGGGCTTAACCCATAAAAGTGTCTTTTGAAAGTGCAGGGCTTGAGTGAAGTAGAGGTAGGCGGAAT   |
| S  | eri | Phyl   | ylum_  | m_Class  | ass_Order    | Order_Famil  |  | TCCCGGTGTAGCGGTGAAATGCATAGATATCACGCAGAACCCCGATTGCGAAGGCAGCCTTCCGGCGCCCTA     |
| V  | a   | um     | Class  | _Order   | _Family      | y_Genus      |  | CTGACGCTGAGGCACGAAAGTGCGGGGATCGAACAGG                                        |

|    |     |       |        |          |             |               |                                                                          |
|----|-----|-------|--------|----------|-------------|---------------|--------------------------------------------------------------------------|
| 49 |     |       |        |          |             |               |                                                                          |
| 3  |     |       |        |          |             |               |                                                                          |
| A  |     |       |        |          |             |               |                                                                          |
| S  | Ba  |       |        |          |             |               | TACGTAGGTGGCAAGCGTTGTCCGGATTTACTGGGTGTAAAGGGCGTGCAGCCGGGTTTATAAGTCAGATGT |
| V  | ct  | Firm  |        | Clostrid | Clostridia  | Clostridia_O  | GAAATCCCGCGGGCTCAACCGCGGAACTGCATTTGAAACTGTAGATCTTGAGTACTGGAGAGGCAGGCGGAA |
| 48 | eri | icute | Clostr | ia_Orde  | _Order_Fa   | Order_Family  | TTCCTAGTGTAGCGGTGAAATGCGTAGATATCGCGCAGGACTCCGATTGCGAAGGCAGCATGCCGGCTCCAC |
| 1  | a   | s     | idia   | r        | mily        | _Genus        | ACTGACGCTGAGGCACGAAAGCGTGGGTATCGAACAGG                                   |
| A  |     |       |        |          |             |               |                                                                          |
| S  | Ba  |       |        |          |             |               | TACGTAGGTGGCAAGCGTTGTCCGGATTTACTGGGTGTAAAGGGCGTGCAGTCGGGAAGACAAGTCAGATGT |
| V  | ct  | Firm  |        |          |             |               | GAAATCCCGCGGGCTCAACCGCGGAACTGCATTTGAAACTGTTTTCTTGAGTACCGGAGAGGTCATCGGAAT |
| 49 | eri | icute | Clostr | Oscillos | Oscillospir |               | TCCTTGTGTAGCGGTGAAATGCGTAGATATCGCGCAGAACTCCGATTGCGAAGGCAGCATGCCGGCTCCACA |
| 5  | a   | s     | idia   | pirales  | aceae       | Oscillibacter | CTGACGCTGAGGCACGAAAGCGTGGGTATCGAACAGG                                    |
| A  |     |       |        |          |             |               |                                                                          |
| S  | Ba  |       |        |          |             |               | TACGTAGGTGGCAAGCGTTATCCGGATTTACTGGGTGTAAAGGGCGTGTAGGCGGGAATGCAAGTCAGATGT |
| V  | ct  | Firm  |        |          |             |               | GAAACTCAGGGCTCAACCCCTGAGCCTGCATTTGAAACTGTATTTCTTGAGTGCTGGAGAGGCAATCGGAAT |
| 43 | eri | icute | Clostr | Oscillos | Oscillospir | Pseudoflavo   | TCCGTGTGTAGCGGTGAAATGCGTAGATATCACGCAGAACTCCGATTGCGAAGGCAGCATACCGGCGCTCA  |
| 7  | a   | s     | idia   | pirales  | aceae       | nifactor      | ACTGACGCTCATGCACGAAAGTGTGGGTATCGAACAGG                                   |
| A  |     |       |        |          |             |               |                                                                          |
| S  | Ba  |       |        |          |             |               | TACGTAGGGGGCAAGCGTTATCCGGATTTACTGGGCGTAAAGGGAGCGCAGGCGGCACGGCAAGTCTGGTG  |
| V  | ct  | Firm  |        |          |             |               | TGAAAACCCGGGGCTCAACCCCGGACTGCATTGGAAACTGCCGGGCTGGAGTGTCGGAGGGGTAAGCGGA   |
| 42 | eri | icute | Clostr | Lachnos  | Lachnospi   | Lachnospira   | ATTCCTAGTGTAGCGGTGAAATGCATAGATATCACGCAGAACCCCGATTGCGAAGGCAGCATGCCGGCTCC  |
| 2  | a   | s     | idia   | pirales  | raceae      | ceae_Genus    | TACTGACGCTGAAGCACGAAGGCGTGGGGATCGAACAGG                                  |
| A  |     |       |        |          |             |               |                                                                          |
| S  | Ba  | Bact  | Bacter | Bacteria | Bacteria_P  | Bacteria_Ph   | TACGTAGGGGGCGAGCGTTATCCGGATTTACTGGGCGTAAAGGGAGCGCAGGCGGCACGGCAAGTCCGGTG  |
| V  | ct  | eria_ | ia_Ph  | _Phylu   | hylum_Cl    | ylum_Class_   | TGAAAGCCCGGGGCCCAACCCCGGGACTGCACTGGAAACTGCCGGGCTGGAGTGTCGGAGGGGTAAGCGG   |
| 45 | eri | Phyl  | ylum_  | m_Class  | ass_Order   | Order_Famil   | AATTCCTGTTGTAGCGGTGAAATGCGTAGATATCGCGCAGAACTCCGATTGCGAAGGCAGCGTACCGGCGC  |
| 8  | a   | um    | Class  | _Order   | _Family     | y_Genus       | CAGACTGACGCTGAGGCACGAAAGCGTGGGGATCGAACAGG                                |
| A  |     |       |        |          |             |               |                                                                          |
| S  | Ba  |       |        |          |             |               | TACGTATGGAGCAAGCGTTATCCGGATTTACTGGGTGTAAAGGGAGCGCAGGCGGTCTGGCAAGTCTGGTG  |
| V  | ct  | Firm  |        |          |             |               | GAAAGCCCGGGGCTCAACCCCGGGACTGCATTGGAAACTGCCGGGCTGGAGTGCCGGAGAGGTAAGCGGA   |
| 42 | eri | icute | Clostr | Lachnos  | Lachnospi   | Lachnospira   | ATTCCTAGTGTAGCGGTGAAATGCATAGATATCGCGCAGAACTCCGATTGCGAAGGCAGCGTACCGGCGCC  |
| 4  | a   | s     | idia   | pirales  | raceae      | ceae_Genus    | AGACTGACGCTGAGGCACGAAAGCGTGGGGATCGAACAGG                                 |
| A  |     |       |        |          |             |               |                                                                          |
| S  | Ba  |       |        |          |             |               | TACGTATGGAGCAAGCGTTATCCGGATTTACTGGGTGTAAAGGGAGCGCAGACGGCAGGGCAAGTCTGATG  |
| V  | ct  | Firm  |        |          |             |               | TGAAATACCGGGGCCCAACCCCGGGGCTGCATTGGGAAGTGCAGGCTGGAGTGCCGGAGAGGCAGGCGG    |
| 46 | eri | icute | Clostr | Lachnos  | Lachnospi   |               | AATTCCTAGTGTAGCGGTGAAATGCATAGATATCGCGCAGAACCCCGATTGCGAAGGCAGCCTTCCGGCGCC |
| 3  | a   | s     | idia   | pirales  | raceae      | A2            | CTACTGACGCTGAGGCACGAAAGTGCGGGGATCGAACAGG                                 |
| A  |     |       |        |          |             |               |                                                                          |
| S  | Ba  |       |        |          |             |               | TACGTATAGAGCAAGCGTTATCCGGATTTACTGGGTGTAAAGGGAGCGCAGGCGGCATGGCAAGTCAGATG  |
| V  | ct  | Firm  |        |          |             |               | TGAAAGCCCGGGGCTCAACCCCGGGACTGCATTTGAAACTGTCAGGCTGGAGTGCCAGGAGAGGCAGGCGGA |
| 51 | eri | icute | Clostr | Lachnos  | Lachnospi   | Lachnospira   | ATTCCTAGTGTAGCGGTGAAATGCATAGATATCACGCAGAACCCCGATTGCGAAGGCAGCCTTCCGGCGCC  |
| 9  | a   | s     | idia   | pirales  | raceae      | ceae_Genus    | TACTGACGCTGAGGCACGAAAGTGCGGGGATCGAACAGG                                  |

|    |     |         |        |          |            |              |  |                                                                           |
|----|-----|---------|--------|----------|------------|--------------|--|---------------------------------------------------------------------------|
| A  | S   | Ba      |        |          |            |              |  | TACGTATGGAGCAAGCGTTATCCGGATTTACTGGGTGTAAAGGGAGCGTAGGCGGCCTGGCAAGCCTGATGT  |
| V  | ct  | Firm    |        |          |            |              |  | GAAATACCGGGGGCCCAACCCCGGGGCTGCATTGGGAACTGCCAGGCTGGAGTGCCGGAGAGGCAGGCGGA   |
| 43 | eri | icute   | Clostr | Lachnos  | Lachnospi  |              |  | ATTCCTAGTGTAGCGGTGAAATGCGTAGATATCGCGCAGAACTCCGATTGCGAAGGCAGCGTACCGGCGCC   |
| 6  | a   | s       | idia   | pirales  | raceae     | A2           |  | AGACTGACGCTGAGGCACGAAAGCGTGGGGATCGAACAGG                                  |
| A  | S   | Ba      |        |          |            |              |  | TACGTATGGAGCAAGCGTTATCCGGATTTACTGGGTGTAAAGGGAGCGTAGGCGGCCTGGCAAGCCTGATGT  |
| V  | ct  | Firm    |        |          |            |              |  | GAAATACCGGGGGCCCAACCCCGGGGCTGCATTGGGAACTGCCAGGCTGGAGTGCCGGAGAGGCAGGCGGA   |
| 45 | eri | icute   | Clostr | Lachnos  | Lachnospi  |              |  | ATTCCTAGTGTAGCGGTGAAATGCGTAGATATCACGCAGAACTCCGATTGCGAAGGCAGCATAACCGGCGCTC |
| 1  | a   | s       | idia   | pirales  | raceae     | A2           |  | AACTGACGCTCATGCACGAAAGTGTGGGTATCGAACAGG                                   |
| A  | S   | Ba      |        |          |            |              |  | TACGGAGGATGCGAGCGTTATCCGGATTTACTGGGTGTAAAGGGAGCGCAGGCGGCACGGCAAGCCTGATG   |
| V  | ct  | Bact    |        |          | Porphyro   | Porphyromo   |  | TGAAAGCCCGCGGCCCAACCGCGGGACTGCATTGGGAACTACCGGGCTGGAGTGCCGGAGAGGTAGGCGG    |
| 40 | eri | eroid   | Bacter | Bacteroi | monadace   |              |  | AATTCCTAGTGTAGCGGTGAAATGCATAGATATCACGCAGAACTCCGATTGCGAAGGCAGCATAACCGGCGC  |
| 8  | a   | ota     | oidia  | dales    | ae         | enus         |  | GCAACTGACGCTCATGCACGAAAGCGTGGGTATCGAACAGG                                 |
| A  | S   | Ba      |        |          |            |              |  | TACGTAGGGGGCAAGCGTTATCCGGATTTACTGGGTGTAAAGGGGGCGCAGACGGCCATGGCAAGCCCGGT   |
| V  | ct  | Firm    |        | Clostrid | Clostridia | Clostridia_O |  | GTGAAAGGCAGGGGCATAACCCCTGGACTGCACTGGGAACTGTCAGGCTGGAGTGCCGGAGGGGTAAAGCG   |
| 46 | eri | icute   | Clostr | ia_Orde  | _Order_Fa  | Order_Family |  | GAATTCCTAGTGTAGCGGTGAAATGCATAGATATCACGCAGAAACCCCGATTGCGAAGGCAGCCTTCCGGCGC |
| 8  | a   | s       | idia   | r        | mily       | _Genus       |  | CCTACTGACGCTGAGGCACGAAAGTGCGGGGATCGAACAGG                                 |
| A  | S   | Ba      | Bact   | Bacteria | Bacteria_P | Bacteria_Ph  |  | TACGTAGGGGGCAAGCGTTATCCGGATTTACTGGGTGTAAAGGGGGCGCAGACGGCCATGGCAAGCCCGGT   |
| V  | ct  | eria_Ph | ia_Ph  | _Phylu   | ylum_Cl    | ylum_Class_  |  | GTGAAAGGCAGGGGCATAACCCCTGGACTGCACTGGGAACTGTCAGACTGGAGTGTCCGGAGAGGCAAGCG   |
| 51 | eri | Phyl    | ylum_  | m_Class  | ass_Order  | Order_Famil  |  | GAATTCCTAGTGTAGCGGTGAAATGCGTAGATATCACGCAGAACTCCGATTGCGAAGGCAGCATGCCGGCTC  |
| 0  | a   | um      | Class  | _Order   | _Family    | y_Genus      |  | CACACTGACGCTGAGGCACGAAAGCGTGGGTATCGAACAGG                                 |
| A  | S   | Ba      |        |          |            |              |  | TACGTATGGGGCAAGCGTTATCCGGATTTACTGGGTGTAAAGGGAGCGCAGACGGCAGGGCAAGTCTGATG   |
| V  | ct  | Firm    |        |          |            |              |  | TGAAAGTCCGGGGCTCAACCCCGGGACTGCATTGGAAGTGTCCGGCTAGAGTGAGGAGAGGTAAGTGGA     |
| 40 | eri | icute   | Clostr | Lachnos  | Lachnospi  | Lachnospira  |  | ATTCCTAGTGTAGCGGTGAAATGCATAGATATCGCGCAGAACTCCGATTGCGAAGGCAGCGTACCGGCGCC   |
| 3  | a   | s       | idia   | pirales  | raceae     | ceae_Genus   |  | AGACTGACGCTGAGGCACGAAAGCGTGGGGATCGAACAGG                                  |
| A  | S   | Ba      |        |          |            |              |  | TACGTATGGAGCAAGCGTTATCCGGATTTACTGGGTGTAAAGGGAGCGCAGACGGCAGGGCAAGTCTGATG   |
| V  | ct  | Firm    |        |          |            |              |  | TGAAAGTCCGGGGCTCAACCCCGGGACTGCATTGGAAGTGTCCGGCTAGAGTGAGGAGAGGTAAGTGGA     |
| 50 | eri | icute   | Clostr | Lachnos  | Lachnospi  | Lachnospira  |  | ATTCCTAGTGTAGCGGTGAAATGCGTAGATATTACGCAGAACTCCGATTGCGAAGGCAGCATAACCGGCGCTC |
| 1  | a   | s       | idia   | pirales  | raceae     | ceae_Genus   |  | AACTGACGCTCATGCACGAAAGCGTGGGTATCGAACAGG                                   |
| A  | S   | Ba      |        |          |            |              |  | TACGTAGGGGGCAAGCGTTATCCGGATTTACTGGGTGTAAAGGGAGCGTAGACGGCAGGGCAAGCCAGAAAG  |
| V  | ct  | Firm    |        |          |            |              |  | TGAAACGCAGAGCTTAACCTTTGCGACTGCTTTTGGAACTGCCAGCTAGAGTACAGGAGAGGTAAGTGGA    |
| 46 | eri | icute   | Clostr | Lachnos  | Lachnospi  |              |  | ATTCCTAGTGTAGCGGTGAAATGCATAGATATCGCGCAGAACTCCGATTGCGAAGGCAGCGTACCGGTGCCA  |
| 7  | a   | s       | idia   | pirales  | raceae     | 28-4         |  | CACCTGACGCTGAGGCACGAAAGCGTGGGGATCGAACAGG                                  |
| A  | Ba  |         |        |          |            |              |  | TACGTAGGGGGCAAGCGTTATCCGGATTTACTGGGTGTAAAGGGAGAGTAGGCGGCAAGGTAAGCGATATG   |
| V  | ct  | Firm    |        |          |            |              |  | TGAAAGCCTTAAGCTTAACCTTAAGGATGGCATAACGAACTATCTAGCTAGAGTACAGGAGAGGAAAGCGGA  |
| 46 | eri | icute   | Clostr | Lachnos  | Lachnospi  |              |  | ATTCCTAGTGTAGCGGTGAAATGCATAGATATCGCGCAGAACTCCGATTGCGAAGGCAGCGTACCGGCGCC   |
| 7  | a   | s       | idia   | pirales  | raceae     | ASF356       |  | AGACTGACGCTGAGGCACAAAAGCGTGGGGATCGAACAGG                                  |

|    |     |       |        |          |              |             |                                                                          |
|----|-----|-------|--------|----------|--------------|-------------|--------------------------------------------------------------------------|
| 54 |     |       |        |          |              |             |                                                                          |
| 0  |     |       |        |          |              |             |                                                                          |
| A  |     |       |        |          |              |             |                                                                          |
| S  | Ba  | Bact  |        |          | Bacteroidale |             | TACGGAGGATGCGAGCGTTATCCGGATTTATTGGGTTTAAAGGGAGCGTAGACGGCGATGCAAGTCTGAAGT |
| V  | ct  | eroid | Bacter | Bacteroi | Bacteroida   | s_Family_Ge | GAAAGGCGGGGGCCCAACCCCGGACTGCTTTGAAACTGTATGGCTGGAGTGCAGGAGAGGTAAGTGAA     |
| 53 | eri | ota   | oidia  | dales    | les_Family   | nus         | TGCGTGGTGTAGCGGTGAAATGCATAGATATCACGCAGAACTCCGATTGCGAAGGCAGCATGCCGGCTCCA  |
| 9  | a   |       |        |          |              |             | CACTGACGCTGAGGCACGAAAGCGTGGGTATCGAACAGG                                  |
| A  |     |       |        |          |              |             |                                                                          |
| S  | Ba  |       |        |          |              |             | TACGTAGGGGGCAAGCGTTATCCGGATTTACTGGGTGTAAAGGGAGCGTAGACGGTGTGCAAGTCAGAAG   |
| V  | ct  | Firm  |        |          |              |             | TGAAAGCCCGGGGCTCAACTCCGGGACTGCTTTTGAAACTGTGTAAGTGGAGTGCAGGAGAGGTAAGCGGA  |
| 40 | eri | icute | Clostr | Lachnos  | Lachnospi    | Lachnospira | ATTCTGGTGTAGCGGTGAAATGCATAGATATCGCGCAGAACTCCGATTGCGAAGGCAGCATGCCGGCTTCC  |
| 4  | a   | s     | idia   | pirales  | raceae       | ceae_Genus  | TACTGACGCTGAAGCACGAAAGCGTGGGGATCGAACAGA                                  |
| A  |     |       |        |          |              |             |                                                                          |
| S  | Ba  |       |        |          |              |             | TACGTAGGGGGCAAGCGTTTCCGGATTTACTGGGTGTAAAGGGAGCGTAGACGGTGTGCAAGTCAGAAGT   |
| V  | ct  | Firm  |        |          |              |             | GAAAGCCCGGGGCTCAACTCCGGGACTGCTTTTGAAACTGTGTGACTGGAGTGCAGGAGAGGTAAGCGGAA  |
| 45 | eri | icute | Clostr | Lachnos  | Lachnospi    | Lachnospira | TGCGCGGTGTAGCGGTGAAATGCATAGATATCGCGCAGAACTCCGATTGCGAAGGCAGCGTACCGGCGCCA  |
| 5  | a   | s     | idia   | pirales  | raceae       | ceae_Genus  | GACTGACGCTCATGCACGAAAGCGTGGGTATCGAACAGG                                  |
| A  |     |       |        |          |              |             |                                                                          |
| S  | Ba  |       |        |          |              |             | TACGGAGGATGCGAGCGTTATCCGGATTTACTGGGTGTAAAGGGAGCGTAGACGGTGTGCAAGTCAGAAG   |
| V  | ct  | Firm  |        |          |              |             | TGAAAGCCCGGGGCTCAACTCCGGGACTGCTTTTGAAACTGTGTGACTGGAGTGCAGGAGAGGTAAGCGGA  |
| 49 | eri | icute | Clostr | Lachnos  | Lachnospi    | Lachnospira | ATTCCATGTGTAGCGGTGAAATGCATAGATATCGCGCAGAACTCCGATTGCGAAGGCAGCGTACCGGCGCTA |
| 6  | a   | s     | idia   | pirales  | raceae       | ceae_Genus  | GACTGACGCTGAGGCACGAAAGCGTGGGGATCGAACGGG                                  |
| A  |     |       |        |          |              |             |                                                                          |
| S  | Ba  |       |        |          |              |             | TACGTAGGGGGCAAGCGTTATCCGGATTTACTGGGTGTAAAGGGAGCGTAGGCGGCGATGCAAGTCAGAAG  |
| V  | ct  | Firm  |        |          |              |             | TGAAAGCCCGGGGCTCAACTCCGGGACTGCTTTTGAAACTGTGTGACTGGAGTGCAGGAGAGGTAAGCGGA  |
| 39 | eri | icute | Clostr | Lachnos  | Lachnospi    | Lachnospira | ATTCTGGTGTAGCGGTGAAATGCGTAGATATCGCGCAGAACTCCGATTGCGAAGGCAGCGTACCGGCGCC   |
| 6  | a   | s     | idia   | pirales  | raceae       | ceae_Genus  | AGACTGACGCTGAGGCACGAAAGCGTGGGGATCGAACAGG                                 |
| A  |     |       |        |          |              |             |                                                                          |
| S  | Ba  |       |        |          |              |             | TACGTAGGGGGCAAGCGTTATCCGGATTTACTGGGTGTAAAGGGAGCGTAGACGGATGTGCAAGTCTGATGT |
| V  | ct  | Firm  |        |          |              |             | GAAAGGCGGGGGCTCAACCCCTGGACTGCATTGAAACTGTAAATCTTGAGTGCCCGAGAGGTAAGCGGAA   |
| 41 | eri | icute | Clostr | Lachnos  | Lachnospi    | Lachnospira | TTCCTAGTGTAGCGGTGAAATGCGTAGATATCGCGCAGAACTCCGATTGCGAAGGCAGCGTACCGGCGCCA  |
| 6  | a   | s     | idia   | pirales  | raceae       | ceae_Genus  | GACTGACGCTGAGGCACGAAAGCGTGGGGATCGAACAGG                                  |
| A  |     |       |        |          |              |             |                                                                          |
| S  | Ba  |       |        |          |              |             | TACGTAGGGGGCAAGCGTTATCCGGATTTACTGGGTGTAAAGGGAGCGCAGACGGCTGTGCAAGTCTGGAG  |
| V  | ct  | Firm  |        |          |              |             | TGAAAGGCGGGGGCCCAACCCCGGACTGCTCTGAAACTGTATGGCTGGAGTGCAGGAGAGGTAAGCGGA    |
| 38 | eri | icute | Clostr | Lachnos  | Lachnospi    | Lachnospira | ATTCTAGTGTAGCGGTGAAATGCATAGATATCGCGCAGAACTCCGATTGCGAAGGCAGCGTACCGGCGCC   |
| 7  | a   | s     | idia   | pirales  | raceae       | ceae_Genus  | AGACTGACGCTGAGGCACGAAAGCGTGGGGATCGAACAGG                                 |
| A  |     |       |        |          |              |             |                                                                          |
| S  | Ba  |       |        |          |              |             | TACGTAGGTGGCAAGCGTTATCCGGATTTACTGGGTGTAAAGGGAGCGCAGACGGCTGTGCAAGTCTGGAGT |
| V  | ct  | Firm  |        |          |              |             | GAAAGCCCGGGGCTCAACCCCGGACTGCTTTGAAACTGTAGGGCTGGAGTGCAGGAGGGGTAAGCGGA     |
| 52 | eri | icute | Clostr | Lachnos  | Lachnospi    |             | ATTCTAGTGTAGCGGTGAAATGCGTAGATATCGCGCAGAACTCCGATTGCGAAGGCAGCGTACCGGTGCCA  |
| 8  | a   | s     | idia   | pirales  | raceae       | UC5-1-2E3   | CACTGACGCTGAGGCACGAAAGCGTGGGGATCGAACAGG                                  |

|    |     |       |         |          |            |               |  |                                                                            |
|----|-----|-------|---------|----------|------------|---------------|--|----------------------------------------------------------------------------|
| A  | S   | Ba    |         |          |            |               |  | TACGTATGGAGCAAGCGTTATCCGGATTTACTGGGTGTAAAGGGAGCGTAGACGGCTGTGCAAGTCTGAAGT   |
|    | V   | ct    | Firm    |          |            |               |  | GAAATGCCGGGGCTCAACCCCGGAAGTCTTTGGAACTGTACAGCTGGAGTGCAGGAGGGGTGAGCGGAA      |
| 39 | eri | icute | Clostr  | Lachnos  | Lachnospi  | Lachnospira   |  | TTCCTAGTGTAGCGGTGAAATGCATAGATATCAGCAGAACTCCGATTGCGAAGGCAGCGTACCGGCGCCA     |
| 3  | a   | s     | idia    | pirales  | raceae     | ceae_Genus    |  | GACTGACGCTGAGGCACGAAAGCGTGGGGATCGAACAGG                                    |
| A  | S   | Ba    |         |          |            |               |  | TACGTAGGGGGCAAGCGTTATCCGGATTTACTGGGTGTAAAGGGAGCGTAGACGGTGTGAGGCAAGTCTGAAG  |
|    | V   | ct    | Firm    |          |            |               |  | TGAAAGCCCGGGCTTAACCGCGGACTGCTTTGGAACTGTCTGACTGGAGTGTGGAGAGGTAAGTGGAA       |
| 45 | eri | icute | Clostr  | Lachnos  | Lachnospi  | Lachnospira   |  | ATTCCCAGTGTAGCGGTGAAATGCGTAGATATCACGCAGAACTCCGATTGCGAAGGCAGCATACCGGCGCC    |
| 7  | a   | s     | idia    | pirales  | raceae     | ceae_Genus    |  | CAACTGACGCTCAGGCACGAAAGCGTGGGTATCGAACAGG                                   |
| A  | S   | Ba    |         |          |            |               |  | TACGTAGGGGGCAAGCGTTATCCGGATTTACTGGGTGTAAAGGGAGCGTAGACGGCATTGCAAGTCTGAAGT   |
|    | V   | ct    | Firm    |          |            |               |  | GAAAGCCCGTGGCTTAACCGCGGAACGGCTTTGGAACTGTGGAAGTGGAGTGTGGAGAGGCAAGCGGAA      |
| 48 | eri | icute | Clostr  | Lachnos  | Lachnospi  | Lachnospira   |  | TTCCTAGTGTAGCGGTGAAATGCGTAGATATCACGCAGAACTCCGATTGCGAAGGCAGCGTACCGGCGCCA    |
| 4  | a   | s     | idia    | pirales  | raceae     | ceae_Genus    |  | GACTGACGCTGAGGCACGAAAGCGTGGGGATCGAACAGG                                    |
| A  | S   | Ba    |         |          |            |               |  | TACGTAGGGGGCAAGCGTTATCCGAATTTACTGGGTGTAAAGGGAGCGTAGACGGCAGCGCAAGTCCGAAG    |
|    | V   | ct    | Firm    |          |            |               |  | TGAAAGCCCGGGGCCAACCCCGGACTGCTTTGGAACTGTGAAGCTGGAGTGCAGGAGGGGCAGGCGG        |
| 54 | eri | icute | Clostr  | Lachnos  | Lachnospi  | Acetatifactor |  | AATTCCTGGTGTAGCGGTGAAATGCATAGATATCACGCAGAACTCCGATTGCGAAGGCAGCATACCGGCGC    |
| 7  | a   | s     | idia    | pirales  | raceae     |               |  | CCGACTGACGCTGAGGCACGAAAGCGTGGGGATCGAACAGG                                  |
| A  | S   | Ba    | Bact    | Bacter   | Bacteria   | Bacteria_Ph   |  | TACGTAGGGGGCAAGCGTTATCCGGATTTACTGGGTGTAAAGGGAGCGTAGGCGGTAAGGCAAGTCTGATG    |
|    | V   | ct    | eria_Ph | ia_Ph    | _Phylu     | ylum_Cl       |  | TGAAAGGCCAGGGCTCAACCCTGGGACTGCATTGGAACTGTGTTAACTGGAGTGTGCGAGAGGCAAGTGGAA   |
| 59 | eri | Phyl  | ylum_   | m_Class  | ass_Order  | Order_Famil   |  | ATTCTAGTGTAGCGGTGAAATGCATAGATATCACGCAGAACTCCGATTGCGAAGGCAGCATACCGGCGCG     |
| 6  | a   | um    | Class   | _Order   | _Family    | y_Genus       |  | CAACTGACGCTCATGCACGAAAGCGTGGGTATCGAACAGG                                   |
| A  | S   | Ba    | Bact    | Bacteroi | Bacteroidi | Bacteroidia_  |  | TACGTAGGTGGCAAGCGTTATCCGGATTTACTGGGTGTAAAGGGAGCGTAGACGGTGTGCGCAAGTCTGGAGT  |
|    | V   | ct    | eroid   | dia_Ord  | a_Order_F  | Order_Famil   |  | GAAATGCCGCAGCTTAAGTGTGCGGAACTGCTTTGGAACTGGCGAACTAGAGTGTGCGGAGGGGTAAAGCGGAA |
| 41 | eri | ota   | oidia   | er       | amily      | y_Genus       |  | TTCCTAGTGTAGCGGTGAAATGCATAGATATCACGCAGAACTCCGATTGCGAAGGCAGCATACCGGCGCTCA   |
| 7  | a   |       |         |          |            |               |  | ACTGACGCTCATGCACGAAAGTGTGGGTATCGAACAGG                                     |
| A  | S   | Ba    |         |          |            |               |  | TACGTAGGGGGCAAGCGTTATCCGGATTTACTGGGTGTAAAGGGAGCGTAGACGGTTGTGTAAGTCTGGAGT   |
|    | V   | ct    | Firm    |          |            |               |  | GAAAGCCCGGGGCCAACCCCGGACTGCTTTGGAACTGTGTAAGTGGAGTACAGGAGGGGCAGGCGGA        |
| 38 | eri | icute | Clostr  | Lachnos  | Lachnospi  | Acetatifactor |  | ATTCTGGTGTAGCGGTGAAATGCGTAGATATCACGCAGAACTCCGATTGCGAAGGCAGCATACCGGCGCG     |
| 2  | a   | s     | idia    | pirales  | raceae     |               |  | CAACTGACGCTCATGCACGAAAGCGTGGGTATCGAACAGG                                   |
| A  | S   | Ba    | Bact    | Bacter   | Bacteria   | Bacteria_Ph   |  | TACGTAGGTGGCAAGCGTTGTCCGGATTTACTGGGTGTAAAGGGAGCGTAGACGGTTATGTAAGTCTGGAGT   |
|    | V   | ct    | eria_Ph | ia_Ph    | _Phylu     | ylum_Cl       |  | GAAAGCCCGGGGCCAACCCCGGACTGCTTTGGAACTGTGTAAGTGGAGTACAGGAGGGGCAGGCGGA        |
| 43 | eri | Phyl  | ylum_   | m_Class  | ass_Order  | Order_Famil   |  | ATTCTGGTGTAGCGGTGAAATGCATAGATATCACGCAGAACTCCGATTGCGAAGGCAGCATACCGGCATCC    |
| 9  | a   | um    | Class   | _Order   | _Family    | y_Genus       |  | AACTGACGCTGAAGCACGAAGCGTGGGTATCAAACAGG                                     |
|    | Ba  |       |         | Bacteroi | Bacteroido | Bacteroidota  |  | TACGTAGGGGGCGAGCGTTATCCGGATTTACTGGGTGTAAAGGGAGCGTAGGCGGCCACGCAAGTCAGAAG    |
| A  | ct  | Bact  | Bacter  | dota_Cl  | ta_Class_  | _Class_Orde   |  | TGAAAACCCGGGGCTCAACCCTGGGAGTGTCTTTGAACTGTGCGGCTAGAGTGTGCGAGGGGTAAGTGGAA    |
|    | S   | eroid | oidota  | ass_Ord  | Order_Fa   | r_Family_Ge   |  | ATTCTAGTGTAGCGGTGAAATGCATAGATATCACGCAGAACTCCGATTGCGAAGGCAGCATACCGGCGCTC    |
| V  | a   | ota   | _Class  | er       | mily       | nus           |  | AACTGACGCTCATGCACGAAAGTGTGGGTATCGAACAGG                                    |

|    |     |       |        |          |             |             |                                                                          |
|----|-----|-------|--------|----------|-------------|-------------|--------------------------------------------------------------------------|
| 45 |     |       |        |          |             |             |                                                                          |
| 6  |     |       |        |          |             |             |                                                                          |
| A  |     |       |        |          |             |             |                                                                          |
| S  | Ba  |       |        |          |             |             | TACGTAGGGGGCAAGCGTTATCCGGATTCACTGGGCGTAAAGGGAGAGTAGGTGGCAGAGCAAGTCCGAAG  |
| V  | ct  | Bact  |        |          | Porphyro    | Porphyromo  | TGAAAACCCAAAGCTCAACTATGGGAATGCTTTAGAAACTGCTCAGCTAGAGTGCAGGAGAGGCAAGTGGA  |
| 46 | eri | eroid | Bacter | Bacteroi | monadace    | nadaceae_G  | ATTCTTAGTGTAGCGGTGAAATGCATAGATATCACGCAGAACTCCGATTGCGAAGGCAGCATACCGGCGCTC |
| 0  | a   | ota   | oidia  | dales    | ae          | enus        | AACTGACGCTCATGCACGAAAGTGTGGGTATCGAACAGG                                  |
| A  |     |       |        |          |             |             |                                                                          |
| S  | Ba  |       |        |          |             |             | TACGTATGGAGCAAGCGTTATCCGGACTTACTGGGTGTAAAGGGAGAGTAGGTGGCAGAGCAAGTCCGAAG  |
| V  | ct  | Bact  |        |          | Porphyro    | Porphyromo  | TGAAAACCCAAAGCTCAACTATGGGAATGCTTTAGAAACTGCTCAGCTAGAGTGCAGGAGAGGCAAGTGGA  |
| 52 | eri | eroid | Bacter | Bacteroi | monadace    | nadaceae_G  | ATTCTTAGTGTAGCGGTGAAATGCATAGATATCACGCAGAACTCCGATTGCGAAGGCAGCATACCGGCGCTC |
| 5  | a   | ota   | oidia  | dales    | ae          | enus        | AACTGACGCTCATGCACGAAAGTGTGGGTATCGAACAGG                                  |
| A  |     |       |        |          |             |             |                                                                          |
| S  | Ba  |       |        |          |             |             | TACGTAGGGGGCAAGCGTTATCCGGATTTACTGGGTGTAAAGGGAGCGTAGGTGGCAGGGCAAGTCAGATG  |
| V  | ct  | Firm  |        |          |             |             | TGAAAACCCGGGGCTCAACTCCGGGAGTGCATTTGAAACTGTCCAGCTAGAGTGCAGGAGAGGTAAGCGGA  |
| 41 | eri | icute | Clostr | Lachnos  | Lachnospi   | Lachnospira | ATTCTTAGTGTAGCGGTGAAATGCATAGATATCACGCAGAACTCCGATTGCGAAGGCAGCATACCGGCATCC |
| 8  | a   | s     | idia   | pirales  | raceae      | ceae_Genus  | AACTGACGCTGAAGCACGGAGGCGTGGGTATCAAAACAGG                                 |
| A  |     |       |        |          |             |             |                                                                          |
| S  | Ba  |       |        |          |             |             | TACGCATGGTGCAAGCGTTATCCGGATTTACTGGGTGTAAAGGGAGCGCAGGCGGTGCGGCAAGTCTGATGT |
| V  | ct  | Firm  |        |          |             |             | GAAAGCCCCGGGGCCCAACCCCGGGGCTGCATTGGGAACTGCCAGGCTGGAGTGCCGGAGAGGCAGGCGGA  |
| 53 | eri | icute | Clostr | Lachnos  | Lachnospi   | A2          | ATTCTTAGTGTAGCGGTGAAATGCGTAGATATTAGGAGGAACACCAGTGGCGAAGGCAGCATACCGGCGCC  |
| 8  | a   | s     | idia   | pirales  | raceae      |             | CAACTGACGCTCAGGCACGAAAGCGTGGGTATCGAACAGG                                 |
| A  |     |       |        |          |             |             |                                                                          |
| S  | Ba  |       |        |          |             |             | TACGTATGGTGCAAGCGTTATCCGGATTTACTGGGTGTAAAGGGAGCGCAGGCGGCGGGCAAGTCAGATGT  |
| V  | ct  | Firm  |        |          |             |             | GAAAGCCCCGGGGCTCAACCCCGGGACTGCATTTGAAACTGTATTCTTGAGTGCTGGAGAGGCAATCGGAAT |
| 58 | eri | icute | Clostr | Oscillos | Oscillospir | Pseudoflavo | TCCGTGTGTAGCGGTGAAATGCGTAGATATACGGAGGAACACCAGTGGCGAAGGCAGCATACCGGCATCCA  |
| 6  | a   | s     | idia   | pirales  | aceae       | nifactor    | ACTGACGCTGAAGCACGAAGGCGTGGGTACCAAACAGG                                   |
| A  |     |       |        |          |             |             |                                                                          |
| S  | Ba  |       |        |          |             |             | TACGTATGGTGCAAGCGTTATCCGGATTTACTGGGTGTAAAGGGTGCGTAGGTGGCAAGGCAAGTCTGAAGT |
| V  | ct  | Firm  |        |          |             |             | GAAAATCCGGGGCTCAACCCCGGAACTGCTTTGGAAACTGTTTAGCTGGAGTACAGGAGAGGTAAGTGGA   |
| 29 | eri | icute | Clostr | Lachnos  | Lachnospi   | Coprococcus | TTCTTAGTGTAGCGGTGAAATGCGTAGATATTAGGAGGAACACCAGTGGCGAAGGCGACTTACTGGACTGCT |
| 8  | a   | s     | idia   | pirales  | raceae      |             | ACTGACACTGAGGCACGAAAGCGTGGGGAGCAAACAGG                                   |
| A  |     |       |        |          |             |             |                                                                          |
| S  | Ba  |       |        |          |             |             | TACGTATGGAGCAAGCGTTATCCGGATTTACTGGGTGTAAAGGGAGCGCAGGCGGCATGGCAAGTCAGATG  |
| V  | ct  | Firm  |        |          |             | Lachnospira | TGAAAGCCCCGGGGCTCAACCCCGGGACTGCATTTGAAACTGTCAGGCTGGAGTGCAGGAGAGGCAGGCGGA |
| 04 | eri | icute | Clostr | Lachnos  | Lachnospi   | ceae_NK4B4  | ATTCTTAGTGTAGCGGTGAAATGCGTAGATATTAGGAGGAACACCAGTGGCGAAGGCGGCCTGCTGGACTG  |
| 1  | a   | s     | idia   | pirales  | raceae      | _group      | TAACTGACGCTGAGGCTCGAAAGCGTGGGGAGCAAACAGG                                 |
| A  |     |       |        |          |             |             |                                                                          |
| S  | Ba  |       |        |          |             |             | TACGTATGGGGCAAGCGTTATCCGGATTTACTGGGTGTAAAGGGAGCGTAGGCGGCCTGGCAAGCCTGATGT |
| V  | ct  | Firm  |        |          |             |             | GAAATACCGGGGCTCAACCCCGGGGCTGCATTGGGAACTGCCAGGCTGGAGTGCCGGAGAGGCAGGCGGA   |
| 07 | eri | icute | Clostr | Lachnos  | Lachnospi   | A2          | ATTCTTAGTGTAGCGGTGAAATGCGTAGATATTAGGAGGAACACCAGTGGCGAAGGCGGCCTGCTGGACGG  |
| 0  | a   | s     | idia   | pirales  | raceae      |             | TGACTGACGCTGAGGCTCGAAAGCGTGGGGAGCAAACAGG                                 |

|    |     |       |        |         |           |            |  |                                                                           |
|----|-----|-------|--------|---------|-----------|------------|--|---------------------------------------------------------------------------|
| A  | S   | Ba    |        |         |           |            |  | TACGTATGGGGCAAGCGTTATCCGGATTTACTGGGTGTAAAGGGAGCGTAGGCGGCCTGGCAAGCCTGATGT  |
|    | V   | ct    | Firm   |         |           |            |  | GAAATACCGGGGCCCCAACCCCGGACTGCTCTGAAACTGTATGGCTGGAGTGCAGGAGAGGTAAGCGGAA    |
| 53 | eri | icute | Clostr | Lachnos | Lachnospi |            |  | TTCCTAGTGTAGCGGTGAAATGCGTAGATATTAGGAGGAACACCAGTGGCGAAGGCGGCCTGCTGGACGGT   |
| 0  | a   | s     | idia   | pirales | raceae    | A2         |  | GACTGACGCTGAGGCTCGAAAGCATGGGTAGCGAACAGG                                   |
| A  | S   | Ba    |        |         |           |            |  | TACGTATGGGGCAAGCGTTATCCGGATTTACTGGGTGTAAAGGGAGCGTAGGCGGCCTGGCAAGCCTGATGT  |
|    | V   | ct    | Firm   |         |           |            |  | GAAATACCGGGGCCCCAACCCCGTCTCGTTCTATAAACTGATAGACTAGAGTGTGGTAGAGGCAAGTGAATT  |
| 57 | eri | icute | Clostr | Lachnos | Lachnospi |            |  | TCTAGTGTAGCGGTAGAATGCGTAGATATTAGAAGGAACACCAGTGGCGAAGGCGGCCTGCTGGACGGTGA   |
| 4  | a   | s     | idia   | pirales | raceae    | A2         |  | CTGACGCTGAGGCTCGAAAGCGTGGGGAGCAAACAGG                                     |
| A  | S   | Ba    |        |         |           |            |  | TACGTATGGGGCAAGCGTTATCCGGATTTACTGGGTGTAAAGGGAGCGCAGGCGGCCTGGCAAGCCTGATGT  |
|    | V   | ct    | Firm   |         |           |            |  | GAAATACCGGGGCCCCAACCCCGGGGCTGCATTGGGAACTGCCAGGCTGGAGTGCCGGAGAGGCAGGCGGA   |
| 21 | eri | icute | Clostr | Lachnos | Lachnospi |            |  | ATTCCTAGTGTAGCGGTGAAATGCGTAGATATTAGGAGGAACACCAGTGGCGAAGGCGGCCTGCTGGACGG   |
| 6  | a   | s     | idia   | pirales | raceae    | A2         |  | TGACTGACGCTGAGGCTCGAAAGCGTGGGGAGCAAACAGG                                  |
| A  | S   | Ba    |        |         |           |            |  | TACGTATGGGGCAAGCGTTATCCGGATTTACTGGGTGTAAAGGGAGCGTAGGCGGCCTGGCAAGCCTGATGT  |
|    | V   | ct    | Firm   |         |           |            |  | GAAATACCGGGGCCCCAACCCCGGGGCTGCATTGGGAACTGCCAGGCTGGAGTGCCGGAGAGGCAGGCGGA   |
| 00 | eri | icute | Clostr | Lachnos | Lachnospi |            |  | ATTCCTAGTGTAGCGGTGAAATGCGTAGATATTAGGAGGAACACCAGTGGCGAAGGCGGCCTGCTGGACGG   |
| 9  | a   | s     | idia   | pirales | raceae    | A2         |  | TGACTGACGCTGAGGCTCGAAAGCGTGGGGAGCAAACAGG                                  |
| A  | S   | Ba    |        |         |           |            |  | TACGTATGGGGCAAGCGTTATCCGGATTTACTGGGTGTAAAGGGAGCGTAGGCGGCAGGGCAAGCCTGATG   |
|    | V   | ct    | Firm   |         |           |            |  | TGAAAGCCCGGGGCTCAACCCCGGGGACTGCATTGGGAACTGCCCGCTCGAGTGCCGGAGGGGCAGGCGGA   |
| 08 | eri | icute | Clostr | Lachnos | Lachnospi |            |  | ATTCCTAGTGTAGCGGTGAAATGCGTAGATATTAGGAGGAACACCAGTGGCGAAGGCGGCCTGCTGGACGG   |
| 2  | a   | s     | idia   | pirales | raceae    | A2         |  | TGACTGACGCTGAGGCTCGAAAGCGTGGGGAGCAAACAGG                                  |
| A  | S   | Ba    |        |         |           |            |  | TACGTATGGTGCAAGCGTTATCCGGATTTACTGGGTGTAAAGGGAGCGCAGGCGGCACGGCAAGCCTGATGT  |
|    | V   | ct    | Firm   |         |           |            |  | GAAAGCCCCGCGGCCCAACCGCGGACTGCATTGGGAACTACCGGGCTGGAGTGCCGGAGAGGTAGGCGGA    |
| 03 | eri | icute | Clostr | Lachnos | Lachnospi |            |  | ATTCCTAGTGTAGCGGTGAAATGCGTAGATATTAGGAGGAACACCAGTGGCGAAGGCGGCCTACTGGACGG   |
| 3  | a   | s     | idia   | pirales | raceae    | Roseburia  |  | TGACTGACGCTGAGGCTCGAAAGCGTGGGGAGCAAACAGG                                  |
| A  | S   | Ba    |        |         |           |            |  | TACGTATGGTGCAAGCGTTATCCGGATTTACTGGGTGTAAAGGGAGCGCAGGCGGCAGGCTTAAGCCTGGTGT |
|    | V   | ct    | Firm   |         |           |            |  | GAAAGCCCCGCGGCCCAACCGCGGACTGCATTGGGAACTGGCGGCTGGAGTGCCGGAGGGGTAGGCGGA     |
| 06 | eri | icute | Clostr | Lachnos | Lachnospi | Lachnospi  |  | ATTCCTAGTGTAGCGGTGAAATGCGTAGATATTAGGAGGAACACCAGTGGCGAAGGCGGCCTACTGGACGG   |
| 0  | a   | s     | idia   | pirales | raceae    | ceae_Genus |  | TGACTGACGCTGAGGCTCGAAAGCGTGGGGAGCAAACAGG                                  |
| A  | S   | Ba    |        |         |           |            |  | TACGTATGGTGCAAGCGTTATCCGGATTTACTGGGTGTAAAGGGAGCGCAGGCGGCACGCTAAGCCTGATGT  |
|    | V   | ct    | Firm   |         |           |            |  | GAAAACCCGCGGCCCAACCGCGGAGTGCATTGGGAACTGGCGGGCTGGAGTACCGGAGGGGCAGGCGGA     |
| 31 | eri | icute | Clostr | Lachnos | Lachnospi | Lachnospi  |  | ATTCCTAGTGTAGCGGTGAAATGCGTAGATATTAGGAGGAACACCAGTGGCGAAGGCGGCCTGCTGGACGG   |
| 7  | a   | s     | idia   | pirales | raceae    | ceae_Genus |  | AGACTGACGCTGAGGCTCGAAAGCGTGGGGAGCAAACAGG                                  |
| A  | ct  | Firm  |        |         |           |            |  | TACGTATGGAGCAAGCGTTATCCGGATTTACTGGGTGTAAAGGGAGCGTAGGCGGCTCTGTAAGTCTGATGT  |
|    | S   | eri   | icute  | Clostr  | Lachnos   | Lachnospi  |  | GAAAATTTGGGGCTCAACCCCAAACGTGCATTGGAACTGCAGGGCTTGAGTGCCGGAGAGGCAGGCGGAA    |
| V  | a   | s     | idia   | pirales | raceae    | Lachnospi  |  | TTCCTAGTGTAGCGGTGAAATGCGTAGATATTAGGAGGAACACCAGTGGCGAAGGCGGCCTGCTGGACGGT   |
|    |     |       |        |         |           | ceae_Genus |  | AAGTACGCTGAGGCTCGAAAGCGTGGGGAGCAAACAGG                                    |

|    |     |       |        |           |            |             |                                                                           |
|----|-----|-------|--------|-----------|------------|-------------|---------------------------------------------------------------------------|
| 22 |     |       |        |           |            |             |                                                                           |
| 5  |     |       |        |           |            |             |                                                                           |
| A  |     |       |        |           |            |             |                                                                           |
| S  | Ba  |       |        |           |            |             | TACGTATGGAGCAAGCGTTATCCGGATTTACTGGGTGTAAAGGGAGCGTAGGCGGCTCTGTAAGTCTGATGT  |
| V  | ct  | Firm  |        |           |            |             | GAAAATTTGGGGCTCAACTCCAAACGTGCATTGGAAACTGCAGGGCTTAGAGTGTCCGAGAGGCAGGCGGAA  |
| 41 | eri | icute | Clostr | Lachnos   | Lachnospi  | Lachnospira | TTCCTAGTGTAGCGGTGAAATGCGTAGATATTAGGAGGAACACCAGTGGCGAAGGCGGCCTGCTGGACGGT   |
| 9  | a   | s     | idia   | pirales   | raceae     | ceae_Genus  | AACTGACGCTGAGGCTCGAAAGCGTGGGGAGCAAACAGG                                   |
| A  |     |       |        |           |            |             |                                                                           |
| S  | Ba  |       |        |           |            |             | TACGTATGGAGCAAGCGTTATCCGGATTTACTGGGCGTAAAGGGAGCGTAGGCGGCCTGCCAAGTCTGATGT  |
| V  | ct  | Firm  |        |           |            |             | GAAAGTCCGGGGCTCAACCCCGGGACTGCATTGGAAACTGTCCGGCTAGAGTGCAGGAGGGGCAGGCGGA    |
| 54 | eri | icute | Clostr | Lachnos   | Lachnospi  | Lachnospira | ATTCCTAGTGTAGCGGTGAAATGCGTAGATATTAGGAGGAACACCAGTGGCGAAGGCGGCCTGCTGGACGG   |
| 4  | a   | s     | idia   | pirales   | raceae     | ceae_Genus  | TAACTGACGTTGAGGCTCGAAAGCGTGGGGAGCAAACAGG                                  |
| A  |     |       |        |           |            |             |                                                                           |
| S  | Ba  |       |        |           |            |             | TACGTATGGAGCAAGCGTTATCCGGATTTACTGGGCGTAAAGGGAGCGTAGGCGGCCTGCCAAGTCTGATGT  |
| V  | ct  | Firm  |        |           |            |             | GAAATACCGGGGGCTCAACCCCGGGGCTGCATTGGAAACTGGCAGGCTGGAGTGCCGGAGAGGCAGGCGGA   |
| 03 | eri | icute | Clostr | Lachnos   | Lachnospi  | A2          | ATTCCTAGTGTAGCGGTGAAATGCGTAGATATTAGGAGGAACACCAGTGGCGAAGGCGGCCTGCTGGACGG   |
| 4  | a   | s     | idia   | pirales   | raceae     |             | TGACTGACGCTGAGGCTCGAAAGCGTGGGGAGCAAACAGG                                  |
| A  |     |       |        |           |            |             |                                                                           |
| S  | Ba  |       |        |           |            |             | TACGTATGGAGCAAGCGTTATCCGGATTTACTGGGTGTAAAGGGAGTGTAGGTGGCATCACAAGTCAGAAGT  |
| V  | ct  | Firm  |        |           |            |             | GAAAGCCCCGGGGCTCAACCCCGGGACTGCTTTTGAAGTGTGGAGCTGGAGTGCAGGAGAGGCAAGTGGAA   |
| 47 | eri | icute | Clostr | Lachnos   | Lachnospi  | Lachnospira | TTCCTAGTGTAGCGGTGAAATGCGTAGATATTAGGAGGAACACCAGTGGCGAAGGCGGCCTGCTGGACTGTA  |
| 5  | a   | s     | idia   | pirales   | raceae     |             | ACTGACACTGAGGCTCGAAAGCGTGGGGAGCAAACAGG                                    |
| A  |     |       |        |           |            |             |                                                                           |
| S  | Ba  |       |        |           |            |             | TACGTATGGAGCAAGCGTTATCCGGATTTACTGGGTGTAAAGGGAGAGTAGGTGGCAGAGCAAGTCCGAAG   |
| V  | ct  | Firm  |        |           |            |             | TGAAAACCCAAAGCTCAACTATGGGAATGCTTTAGAAACTGCTCAGCTAGAGTGCAGGAGAGGCAAGTGGAA  |
| 01 | eri | icute | Clostr | Lachnos   | Lachnospi  | Lachnospira | ATTCTTAGTGTAGCGGTGAAATGCGTAGATATTAGGAGGAACACCAGTGGCGAAGGCGGCCTGCTGGACTGT  |
| 0  | a   | s     | idia   | pirales   | raceae     | ceae_Genus  | AACTGACACTGAGGCTCGAAAGCGTGGGGAGCAAACAGG                                   |
| A  |     |       |        |           |            |             |                                                                           |
| S  | Ba  |       |        |           |            |             | TACGTATGGAGCAAGCGTTATCCGGATTTACTGGGTGTAAAGGGAGTGTAGGTGGCCAGGCAAGTCAGAAG   |
| V  | ct  | Firm  |        |           |            |             | TGAAAGCCCCGGGGCTCAACCCCGGGACTGCTTTTGAAGTGCAGGGCTAGAGTGCAGGAGGGGCAAGTGGAA  |
| 46 | eri | icute | Clostr | Lachnos   | Lachnospi  | Lachnospira | ATTCCTAGTGTAGCGGTGAAATGCGTAGATATTAGGAGGAACACCAGTGGCGAAGGCGGCCTGCTGGACTGT  |
| 1  | a   | s     | idia   | pirales   | raceae     |             | AACTGACACTGAGGCTCGAAAGCGTGGGGAGCAAACAGG                                   |
| A  |     |       |        |           |            |             |                                                                           |
| S  | Ba  |       |        |           |            |             | TACGTAGGGGGCGAGCGTTATCCGGAATTACTGGGTGTAAAGGGTGAGTAGGCGGCTGTGCAAGTCATATGT  |
| V  | ct  | Firm  |        |           |            |             | GAAATACAGGGGGCTTAACCCCTGTGCCGATAAGAAACTGTACAGCTTAGAGTGCAGGAGAGGCAAGCGGA   |
| 19 | eri | icute | Clostr | Lachnos   | Lachnospi  | Lachnospira | ATTCCTGGTGTAGCGGTGAAATGCGTAGATATCAGGAAGAACACCGGTGGCGAAGGCGGCCTGCTGGACTGT  |
| 6  | a   | s     | idia   | pirales   | raceae     | ceae_Genus  | AACTGACGCTGAGTCACGAAAGCGTGGGGAGCGAACAGG                                   |
| A  |     |       |        | Peptostr  |            |             |                                                                           |
| S  | Ba  |       |        | eptococ   |            |             | TACGTAGGGGGCTAGCGTTATCCGGAATTACTGGGCGTAAAGGGTGCGTAGGTGGTTTCTTAAGTCAGAGGT  |
| V  | ct  | Firm  |        | cales-    | Peptostrep |             | GAAAGGCTACGGCTCAACCGTAGTAAGCCTTTGAAACTGGGAAACTTGAGTGCAGGAGAGGAGAGTGGAAT   |
| 20 | eri | icute | Clostr | Tissierel | tococcacea |             | TCCTAGTGTAGCGGTGAAATGCGTAGATATTAGGAGGAACACCAGTTGCGAAGGCGGCCTCTCTGGACTGTAA |
| 7  | a   | s     | idia   | lales     | e          | Romboutsia  | CTGACACTGAGGCACGAAAGCGTGGGGAGCAAACAGG                                     |

|    |      |       |        |  |           |            |             |  |                                                                                                                                                                                                                                                                             |
|----|------|-------|--------|--|-----------|------------|-------------|--|-----------------------------------------------------------------------------------------------------------------------------------------------------------------------------------------------------------------------------------------------------------------------------|
| A  |      |       |        |  | Peptostr  |            |             |  |                                                                                                                                                                                                                                                                             |
| S  | Ba   |       |        |  | eptococ   |            |             |  |                                                                                                                                                                                                                                                                             |
| V  | ct   | Firm  |        |  | cales-    | Peptostrep |             |  |                                                                                                                                                                                                                                                                             |
| 20 | eri  | icute | Clostr |  | Tissierel | tococcacea |             |  |                                                                                                                                                                                                                                                                             |
| 9  | a    | s     | idia   |  | lales     | e          | Romboutsia  |  | TACGTAGGGGGCTAGCGTTATCCGGAATTACTGGGCGTAAAGGGTGCGTAGGTGGTTTCTTAAGTCAGAGGT<br>GAAAGGCTACGGCTCAACCGTAGTAAGCCTTTGAAACTGGGGAACCTTGAGTGCAGGAGAGGAGAGTGGAAT<br>TCCTAGTGTAGCGGTGAAATGCGTAGATATTAGGAGGAACACCAGTTGCGAAGGCGGCTCTCTGGACTGTAA<br>CTGACACTGAGGCACGAAAGCGTGGGGAGCAAACAGG   |
| A  |      |       |        |  | Peptostr  |            |             |  |                                                                                                                                                                                                                                                                             |
| S  | Ba   |       |        |  | eptococ   |            |             |  |                                                                                                                                                                                                                                                                             |
| V  | ct   | Firm  |        |  | cales-    | Peptostrep |             |  |                                                                                                                                                                                                                                                                             |
| 44 | eri  | icute | Clostr |  | Tissierel | tococcacea |             |  |                                                                                                                                                                                                                                                                             |
| 3  | a    | s     | idia   |  | lales     | e          | Romboutsia  |  | TACGCAGGGGGCTAGCGTTATCCGGAATTACTGGGCGTAAAGGGTGCGTAGGTGGTTTCTTAAGTCAGAGGT<br>GAAAGGCTACGGCTCAACCGTAGTAAGCCTTTGAAACTGGGGAACCTTGAGTGCAGGAGAGGAGAGTGGAAT<br>TCCTAGTGTAGCGGTGAAATGCGTAGATATTAGGAGGAACACCAGTTGCGAAGGCGGCTCTCTGGACTGTAA<br>CTGACACTGAGGCACGAAAGCGTGGGGAGCAAACAGG   |
| A  |      |       |        |  | Peptostr  |            |             |  |                                                                                                                                                                                                                                                                             |
| S  | Ba   |       |        |  | eptococ   |            |             |  |                                                                                                                                                                                                                                                                             |
| V  | ct   | Firm  |        |  | cales-    |            | Anaerovorac |  |                                                                                                                                                                                                                                                                             |
| 24 | eri  | icute | Clostr |  | Tissierel | Anaerovor  | aceae_Genu  |  |                                                                                                                                                                                                                                                                             |
| 0  | a    | s     | idia   |  | lales     | acaceae    | s           |  | TACGTAGGGGGCAAGCGTTATCCGGAATTATTGGGCGTAAAGAGTACGTAGGCGGTTCTTTAAGCGCAGGGT<br>TTAAGGCGATAGCTTAACCTATCGTTCGCCCTGTGAACTGGGGGACTTGAGTATCGGAGAGGAAAGCGGAATT<br>CCTAGTGTAGCGGTGAAATGCGTAGATATTAGGAGGAACACCAGTGGCGAAGGCGGCTTTCTGGACGAAAA<br>CTGACGCTGAGGTACGAAAGCGTGGGGAGCAAACAGG   |
| A  |      |       |        |  | Peptostr  |            |             |  |                                                                                                                                                                                                                                                                             |
| S  | Ba   |       |        |  | eptococ   |            | Anaerovorac |  |                                                                                                                                                                                                                                                                             |
| V  | ct   | Firm  |        |  | cales-    |            | aceae_Genu  |  |                                                                                                                                                                                                                                                                             |
| 33 | eri  | icute | Clostr |  | Tissierel | Anaerovor  | s           |  | CACGTAGGGGGCGAGCGTTATCCGGAATCATTGGGCGTAAAGGGTGCGTAGGCGGCCCTTTAAGCGCGGGG<br>TCTAAGGCGGTGGCCCAACCACCGTTTCGCCCCGCGAAGTGGAGGGCTAGAGTGTGCGGAGAGGGAAAGCGGAA<br>TTCCTAGTGTAGCGGTGAAATGCGTAGATATTAGGAGGAACACCAGTGGCGAAGGCGGCTTCTGGACGAA<br>GACTGACGCTGAGGCACGAAAGCGTGGGGAGCGAACAGG  |
| A  |      |       |        |  | Peptostr  |            |             |  |                                                                                                                                                                                                                                                                             |
| S  | Ba   |       |        |  | eptococ   |            | Anaerovorac |  |                                                                                                                                                                                                                                                                             |
| V  | ct   | Firm  |        |  | cales-    |            | aceae_Genu  |  |                                                                                                                                                                                                                                                                             |
| 15 | eri  | icute | Clostr |  | Tissierel | Anaerovor  | s           |  | TACGTAGGGGGCAAGCGTTATCCGGAATTATTGGGCGTAAAGAGTACGTAGGTGGCAACCTAAGCGCAGGG<br>TTTAAGGCAATGGCTCAACCATTGTTCCGCCCTGCGAAGTGGGATGCTTGAGTGCAGGAGAGGAAAGCGGAAT<br>TCCTAGTGTAGCGGTGAAATGCGTAGATATTAGGAGGAACACCAGTGGCGAAGGCGGCTTTCTGGACTGTAA<br>CTGACACTGAGGTACGAAAGCGTGGGGAGCAAACAGG   |
| A  |      |       |        |  | Peptostr  |            |             |  |                                                                                                                                                                                                                                                                             |
| S  | Ba   |       |        |  | eptococ   |            | Family_XIII |  |                                                                                                                                                                                                                                                                             |
| V  | ct   | Firm  |        |  | cales-    |            | _AD3011_gr  |  |                                                                                                                                                                                                                                                                             |
| 23 | eri  | icute | Clostr |  | Tissierel | Anaerovor  | oup         |  | TACGTAGGGGGCAAGCGTTATCCGGAATTATTGGGCGTAAAGAGTGCCTAGGTGGTTACCTAAGCAGGGGG<br>TGAAAGGCAATGGCTCAACCATTGTTAGCCCTCTGAACTGGGTTACTTGAGTGCAGGAGAGGAAAGCGGAA<br>TTCCTAGTGTAGCGGTGAAATGCGTAGATATTAGGAGGAACACCAGTGGCGAAGGCGGCTTTCTGGACTGAA<br>ACTGACACTGAGGCACGAAAGTGTGGGGAGCAAACAGG    |
| A  |      |       |        |  | Peptostr  |            |             |  |                                                                                                                                                                                                                                                                             |
| S  | Ba   |       |        |  | eptococ   |            | Family_XIII |  |                                                                                                                                                                                                                                                                             |
| V  | ct   | Firm  |        |  | cales-    |            | _AD3011_gr  |  |                                                                                                                                                                                                                                                                             |
| 29 | eri  | icute | Clostr |  | Tissierel | Anaerovor  | oup         |  | TACGTAGGGGGCAAGCGTTATCCGGAATTATTGGGCGTAAAGAGTGCCTAGGTGGTTACTTAAGCGCGGGGT<br>TTAAGGCAATGGCTCAACCATTGTTCCGCCCTGCGAAGTGGGTTACTTGAGTGCAGGAGAGGAAAGCGGAATT<br>CCTAGTGTAGCGGTGAAATGCGTAGATATTAGGAGGAACACCAGTGGCGAAGGCGGCTTTCTGGACTGTAC<br>TGACACTGAGGCACGAAAGTGTGGGGAGCAAACAGG    |
| A  |      |       |        |  | Peptostr  |            |             |  |                                                                                                                                                                                                                                                                             |
| S  | Ba   |       |        |  | eptococ   |            |             |  |                                                                                                                                                                                                                                                                             |
| V  | ct   | Firm  |        |  | cales-    |            |             |  |                                                                                                                                                                                                                                                                             |
| 30 | eri  | icute | Clostr |  | Peptoco   | Peptococc  | Peptococcac |  |                                                                                                                                                                                                                                                                             |
| 7  | a    | s     | idia   |  | ccales    | aceae      | eae_Genus   |  | TACGTAGGGGAGCGAGCGTTGTCCGGAATTACTGGGCGTAAAGGGCGCGTAGGCGGGAACTTAAGTTAGATG<br>TGAAAACTCCGGGCTTAACCTGGAGACTGCATTTAAACTGGGTTTCTTGAGGGCAGGAGAGGAAAGTGGA<br>ATTCCTAGTGTAGCGGTGAAATGCGTAGATATTAGGAGGAACACCAGTGGCGAAGGCGGACTTTCTGGACTGT<br>ACCTGACGCTGAGGCGCGAAAGCATTGGGGAGCGAACAGG |
| A  | Ba   |       |        |  |           |            |             |  |                                                                                                                                                                                                                                                                             |
| ct | Firm |       |        |  |           |            |             |  |                                                                                                                                                                                                                                                                             |
| S  | eri  | icute | Clostr |  | Peptoco   | Peptococc  | Peptococcac |  |                                                                                                                                                                                                                                                                             |
| V  | a    | s     | idia   |  | ccales    | aceae      | eae_Genus   |  | TACGTAGGGAGCAAGCGTTGTCCGGAATTACTGGGCGTAAAGGGCGCGTAGGTGGGCGCTTAAGTCAGGTG<br>TGAAAACTCCGGGCTCAACCTGGAGACTGCACCTGAAACTGGGTGTCTTGAGGGCAGGAGAGGAAAGTGGA<br>ATTCCTAGTGTAGCGGTGAAATGCGTAGATATTAGGAGGAACACCAGTGGCGAAGGCGGACTTTCTGGACTGT<br>ACCTGACGCTGAGGCGCGAAAGCGTGGGTAGCGAACGGG  |

|    |     |               |                          |                           |                                 |                                                        |                                                                           |
|----|-----|---------------|--------------------------|---------------------------|---------------------------------|--------------------------------------------------------|---------------------------------------------------------------------------|
| 22 |     |               |                          |                           |                                 |                                                        |                                                                           |
| 1  |     |               |                          |                           |                                 |                                                        |                                                                           |
| A  |     |               |                          |                           |                                 |                                                        |                                                                           |
| S  | Ba  | Firm<br>icute | Clostr<br>idia           | Peptoco<br>ccales         | Peptococc<br>aceae              | Peptococcac<br>eae_Genus                               | TACGGAGGATGCGAGCGTTATCCGGATTTATTGGGTTTAAAGGGCGCGTAGGTGGGCGCTTAAGTCAGGTGT  |
| V  | ct  |               |                          |                           |                                 |                                                        | GAAACTCCGGGCTCAACCTGGAGACTGCACTTGAAACTGGGTGTCTTGAGGGCAGGAGAGGAAAGTGGAA    |
| 51 | eri |               |                          |                           |                                 |                                                        | TTCCTAGTGTAGCGGTGAAATGCGTAGAGATTAGGAGGAACACCAGTGGCGAAGGCGACTTTCTGGACTGTA  |
| 7  | a   | s             |                          |                           |                                 |                                                        | CCTGACGCTGAGGCGCGAAAGCGTGGGTAGCGAACGGG                                    |
| A  |     |               |                          |                           |                                 |                                                        |                                                                           |
| S  | Ba  | Firm<br>icute | Clostr<br>idia           | Clostrid<br>iales         | Clostridia<br>ceae              | Clostridiace<br>ae_Genus                               | TACGTAGGGGGCAAGCGTTGTCCGGATTTACTGGGCGTAAAGGGAGCGTAGGCGGATTTTTAAGTGGGATGT  |
| V  | ct  |               |                          |                           |                                 |                                                        | GAAATACCCGGGCTCAACTTGGGTGCTGCATTCCAAACTGGAAGTCTAGAGTGCAGGAGAGGAAAGTGGAA   |
| 46 | eri |               |                          |                           |                                 |                                                        | TTCCTAGTGTAGCGGTGAAATGCGTAGAGATTAGGAGGAACACCAGTGGCGAAGGCGGCTTTCTGGACTGTA  |
| 4  | a   | s             |                          |                           |                                 |                                                        | ACTGACACTGAGGTACGAAAGCGTGGGGAGCAAACAGG                                    |
| A  |     |               |                          |                           |                                 |                                                        |                                                                           |
| S  | Ba  | Firm<br>icute | Clostr<br>idia           | Clostrid<br>iales         | Clostridia<br>ceae              | Clostridium<br>_sensu_strict<br>o_1                    | TACGTAGGTGGCAAGCGTTGTCCGGATTTACTGGGCGTAAAGGGAGCGTAGGCGGATTTTTAAGTGGGATGT  |
| V  | ct  |               |                          |                           |                                 |                                                        | GAAATACCCGGGCTCAACTTGGGTGCTGCATTCCAAACTGGAAGTCTAGAGTGCAGGAGAGGAAAGTGGAA   |
| 52 | eri |               |                          |                           |                                 |                                                        | TTCCTAGTGTAGCGGTGAAATGCGTAGAGATTAGGAAGAACACCAGTGGCGAAGGCGACTTTCTGGACTGTA  |
| 7  | a   | s             |                          |                           |                                 |                                                        | ACTGACGCTGAGGCTCGAAAGCGTGGGGAGCAAACAGG                                    |
| A  |     |               |                          |                           |                                 |                                                        |                                                                           |
| S  | Ba  | Firm<br>icute | Clostr<br>idia           | Clostrid<br>iales         | Clostridia<br>ceae              | Clostridium<br>_sensu_strict<br>o_1                    | TACGTAGGTGGCGAGCGTTGTCCGGATTTACTGGGCGTAAAGGGAGCGTAGGCGGACTTTTTAAGTGAGATGT |
| V  | ct  |               |                          |                           |                                 |                                                        | GAAATACTCGGGCTCAACTTGAGTGCTGCATTCCAAACTGGAAGTCTAGAGTGCAGGAGAGGAGAATGGAA   |
| 08 | eri |               |                          |                           |                                 |                                                        | TTCTTAGTGTAGCGGTGAAATGCGTAGAGATTAGGAAGAACACCAGTGGCGAAGGCGATTCTCTGGACTGTA  |
| 0  | a   | s             |                          |                           |                                 |                                                        | ACTGACGCTGAGGCTCGAAAGCGTGGGGAGCAAACAGG                                    |
| A  |     |               |                          |                           |                                 |                                                        |                                                                           |
| S  | Ba  | Firm<br>icute | Clostr<br>idia           | Clostrid<br>iales         | Clostridia<br>ceae              | Clostridium<br>_sensu_strict<br>o_1                    | TACGTAGGTGGCGAGCGTTGTCCGGATTTACTGGGCGTAAAGGGAGCGTAGGCGGACTTTTTAAGTGAGATGT |
| V  | ct  |               |                          |                           |                                 |                                                        | GAAATACTCGGGCTCAACTTGAGTGCTGCATTCCAAACTGTAAGTCTAGAGTGCAGGAGAGGAGAATGGAA   |
| 15 | eri |               |                          |                           |                                 |                                                        | TTCCTAGTGTAGCGGTGAAATGCGTAGAGATTAGGAAGAACACCAGTGGCGAAGGCGATTCTCTGGACTGTA  |
| 5  | a   | s             |                          |                           |                                 |                                                        | ACTGACGCTGAGGCTCGAAAGCGTGGGGAGCAAACAGG                                    |
| A  |     |               |                          |                           |                                 |                                                        |                                                                           |
| S  | Ba  | Firm<br>icute | Clostr<br>idia           | Clostrid<br>iales         | Clostridia<br>ceae              | Clostridium<br>_sensu_strict<br>o_1                    | TACGTAGGTGGCGAGCGTTGTCCGGATTTACTGGGCGTAAAGGGAGCGTAGGCGGACTTTTTAAGTGAGATGT |
| V  | ct  |               |                          |                           |                                 |                                                        | GAAATACTCGGGCTCAACTTGAGTGCTGCATTCCAAACTGGAAGTCTAGAGTGCAGGAGAGGAGAATGGAA   |
| 02 | eri |               |                          |                           |                                 |                                                        | TTCTTAGTGTAGCGGTGAAATGCGTAGAGATTAGGAAGAACACCAGTGGCGAAGGCGATTCTCTGGACTGTA  |
| 5  | a   | s             |                          |                           |                                 |                                                        | ACTGACGCTGAGGCTCGAAAGCGTGGGGAGCAAACAGG                                    |
| A  |     |               |                          |                           |                                 |                                                        |                                                                           |
| S  | Ba  | Firm<br>icute | Clostr<br>idia           | Clostrid<br>iales         | Clostridia<br>ceae              | Clostridium<br>_sensu_strict<br>o_6                    | TACGTAGGTGGCAAGCGTTGTCCGGATTTACTGGGCGTAAAGGGAGCGTAGGCGGACCTTTAAGTGAGATGT  |
| V  | ct  |               |                          |                           |                                 |                                                        | GAAATACCCGAGCTCAACTTGGGTGCTGCATTCCAAACTGGAGGTCTAGAGTGTGCGAGAGGTAAGTGGAA   |
| 60 | eri |               |                          |                           |                                 |                                                        | TCCTAGTGTAGCGGTGAAATGCGTAGAGATTAGGAAGAACCCCGGTGGCGAAGGCGACTTACTGGACGATA   |
| 7  | a   | s             |                          |                           |                                 |                                                        | ACTGACGCTGAGGCTCGAAAGCGTGGGGAGCAAACAGG                                    |
| A  |     |               |                          |                           |                                 |                                                        |                                                                           |
| S  | Ba  | Firm<br>icute | Firmic<br>utes_<br>Class | Firmicut<br>es_<br>_Order | Firmicutes<br>_Class_<br>_Order | Firmicutes_<br>_Class_<br>_Order<br>_Family_<br>_Genus | TACGTAGGGGGCAAGCGTTATCCGGAATGACTGGGCGTAAAGGGTGCCTAGGTGGTTTGGCAAGTTAGTAGC  |
| V  | ct  |               |                          |                           |                                 |                                                        | GTAACCTCCGGGGCTCAACTCCGGAATACTACTAAAACTGTCGGACTTGAGTGCAGAAGAGGGAAGTGGAA   |
| 43 | eri |               |                          |                           |                                 |                                                        | TTCCATGTGTAGCGGTGAAATGCGTAGAGATATGGAGGAACACCAGTGGCGAAGGCGGCTTCTGGTCTGCA   |
| 4  | a   | s             |                          |                           |                                 |                                                        | ACTGACACTGAGGCGCGAAAGCGTGGGGAGCAAACAGG                                    |

|    |     |       |        |          |            |              |                                                                          |
|----|-----|-------|--------|----------|------------|--------------|--------------------------------------------------------------------------|
| A  |     |       |        |          |            |              |                                                                          |
| S  | Ba  |       |        | Clostrid | Clostridia | Clostridia_v | TACGTAGGAGGCAAGCGTTATCCGGAATGACTGGGCGTAAAGGGTGCGTAGGTGGTTTGACAAGTTAGTAG  |
| V  | ct  | Firm  |        | ia_vadi  | _vadinBB6  | adinBB60_gr  | CGCAACTCCGGAGCTTAACCTTCGGAATACTACTAAAACTGTTGGACTTGAGTGCAGGAGGGGCAATCGGA  |
| 06 | eri | icute | Clostr | nBB60_   | 0_group_F  | oup_Family   | ATTCCTAGTGTAGCGGTGGAATGCGTAGATATTAGGAGGAACACCAGTGGCGAAGGCGGATTGCTAGACTGT |
| 1  | a   | s     | idia   | group    | amily      | _Genus       | AACTGACACTGAGGCACGAAAGCGTGGGGAGCAAACAGG                                  |
| A  |     |       |        |          |            |              |                                                                          |
| S  | Ba  |       |        | Clostrid | Clostridia | Clostridia_v | TACGTAGGAGGCAAGCGTTATCCGGAATGACTGGGCGTAAAGGGTGCGTAGGTGGTTTGATAAGTTAGTAGC |
| V  | ct  | Firm  |        | ia_vadi  | _vadinBB6  | adinBB60_gr  | GCAACTCCGGAGCTTAACCTTCGGAATACTACTAAAACTGTCGGACTTGAGTGCAGAAGGGGCAACCGGAA  |
| 35 | eri | icute | Clostr | nBB60_   | 0_group_F  | oup_Family   | TTCCTAGTGTAGCGGTGGAATGCGTAGATATTAGGAGGAACACCAGTGGCGAAGGCGGGTTGCTAGGCTGTA |
| 0  | a   | s     | idia   | group    | amily      | _Genus       | ACTGACACTGAGGCACGAAAGCGTGGGGAGCAAACAGG                                   |
| A  |     |       |        |          |            |              |                                                                          |
| S  | Ba  |       |        | Clostrid | Clostridia | Clostridia_v | TACGTAGGAGGCAAGCGTTATCCGGAATGACTGGGCGTAAAGGGTGCGTAGGTGGTTTGACAAGTTGGTAG  |
| V  | ct  | Firm  |        | ia_vadi  | _vadinBB6  | adinBB60_gr  | CGTAACTCCGGGGCTCAACCTCGGCACTACTACCAAACTGTTGGACTTGAGTGCAGGAGGGGCAAATGGA   |
| 13 | eri | icute | Clostr | nBB60_   | 0_group_F  | oup_Family   | ATTCCTAGTGTAGCGGTGGAATGCGTAGATATTAGGAGGAACACCAGTGGCGAAGGCGATTGCTGGACTGT  |
| 8  | a   | s     | idia   | group    | amily      | _Genus       | AACTGACACTGAGGCACGAAAGCGTGGGGAGCAAACAGG                                  |
| A  |     |       |        |          |            |              |                                                                          |
| S  | Ba  |       |        | Clostrid | Clostridia | Clostridia_v | TACGTAGGAGGCAAGCGTTATCCGGAATGACTGGGCGTAAAGGGTGCGTAGGTGGTTTGACAAGTTGGTAG  |
| V  | ct  | Firm  |        | ia_vadi  | _vadinBB6  | adinBB60_gr  | CGTAACTCCGAGGCTTAACCTCGGCACTACTACCAAACTGTTGGACTCGAGTGCAGGAGGGGCAAATGGA   |
| 12 | eri | icute | Clostr | nBB60_   | 0_group_F  | oup_Family   | ATTCCTAGTGTAGCGGTGGAATGCGTAGATATTAGGAGGAACACCAGTGGCGAAGGCGATTGCTGGACTGT  |
| 7  | a   | s     | idia   | group    | amily      | _Genus       | AACTGACACTGAGGCACGAAAGCGTGGGGAGCAAACAGG                                  |
| A  |     |       |        |          |            |              |                                                                          |
| S  | Ba  |       |        | Clostrid | Clostridia | Clostridia_v | TACGTAGGAGGCAAGCGTTATCCGGAATGACTGGGCGTAAAGGGTGCGTAGGTGGTTTGACAAGTTGGTAG  |
| V  | ct  | Firm  |        | ia_vadi  | _vadinBB6  | adinBB60_gr  | CGTAAATCCGAGGCTCAACCTCGGCACTACTACCAAACTGTTGGACTTGAGTGCAGGAGGGGCAACTGGA   |
| 21 | eri | icute | Clostr | nBB60_   | 0_group_F  | oup_Family   | ATTCCTAGTGTAGCGGTGGAATGCGTAGATATTAGGAGGAACACCAGTGGCGAAGGCGAGTTGCTGGACTGT |
| 0  | a   | s     | idia   | group    | amily      | _Genus       | AACTGACACTGAGGCACGAAAGCGTGGGGAGCAAACAGG                                  |
| A  |     |       |        |          |            |              |                                                                          |
| S  | Ba  |       |        | Clostrid | Clostridia | Clostridia_v | TACGTAGGAGGCAAGCGTTATCCGGAATGACTGGGCGTAAAGGGTGCGTAGGTGGTTTGGAAGTTAGTAG   |
| V  | ct  | Firm  |        | ia_vadi  | _vadinBB6  | adinBB60_gr  | CGTAACTCCGGGGCTCAACTCCGGAATACTACTAAAACTGTCGGACTTGAGTGCAGGAGGGGCAATTGGA   |
| 06 | eri | icute | Clostr | nBB60_   | 0_group_F  | oup_Family   | ATTCCTAGTGTAGCGGTGGAATGCGTAGATATTAGGAAGAACACCAGTGGCGAAGGCGAATTGCTGGACTGT |
| 5  | a   | s     | idia   | group    | amily      | _Genus       | AACTGACACTGAGGCACGAAAGCGTGGGGAGCAAACAGG                                  |
| A  |     |       |        |          |            |              |                                                                          |
| S  | Ba  |       |        | Clostrid | Clostridia | Clostridia_v | TACGTAGGAGGCAAGCGTTATCCGGAATGACTGGGCGTAAAGGGTGCGTAGGTGGTTTGACAAGTTAGTAG  |
| V  | ct  | Firm  |        | ia_vadi  | _vadinBB6  | adinBB60_gr  | CGTAAATCCGGGGCTCAACTTCGGAATACTACTAAAACTGTTGGGCTTGAGTGCAGGAGAGGTGAATGGAA  |
| 26 | eri | icute | Clostr | nBB60_   | 0_group_F  | oup_Family   | TTCCTAGTGTAGCGGTGGAATGCGTAGATATTAGGAGGAACACCAGCGGCGAAAGCGATTCACTGGACTGT  |
| 3  | a   | s     | idia   | group    | amily      | _Genus       | AACTGACACTGAGGCACGAAAGCGTGGGGAGCAAACAGG                                  |
| A  |     |       |        |          |            |              |                                                                          |
| S  | Ba  |       |        | Clostrid | Clostridia | Clostridia_v | TACGTAGGAGGCAAGCGTTATCCGGAATGACTGGGCGTAAAGGGTGCGTAGGTGGTTTGACAAGTTGGTAG  |
| V  | ct  | Firm  |        | ia_vadi  | _vadinBB6  | adinBB60_gr  | CGTAACTCCGGGGCTCAACCTCGGATCTACTACCAAACTGTTGGGCTTGAGTGCAGGAGGGGTGAATGGAA  |
| 22 | eri | icute | Clostr | nBB60_   | 0_group_F  | oup_Family   | TTCCTAGTGTAGCGGTGGAATGCGTAGATATTAGGAGGAACACCAGCGGCGAAGGCGATTCACTGGACTGT  |
| 2  | a   | s     | idia   | group    | amily      | _Genus       | AACTGACACTGAGGCACGAAAGCGTGGGGAGCAAACAGG                                  |
| A  | Ba  |       |        | Clostrid | Clostridia | Clostridia_v | TACGTAGGAGGCAAGCGTTATCCGGAATGACTGGGCGTAAAGGGTGCGTAGGTGGTTTGGAAGTTGGTAGC  |
|    | ct  | Firm  |        | ia_vadi  | _vadinBB6  | adinBB60_gr  | GTAATCCCGGGGGCTCAACCTCGGTGCTACTACCAAACTGTTGAACTTGAGTGCAGGAGGGGTGAATGGAA  |
| S  | eri | icute | Clostr | nBB60_   | 0_group_F  | oup_Family   | TCCCAGTGTAGCGGTGGAATGCGTAGATATTGGGAAGAACACCAGCGGCGAAGGCGATTCACTGGACTGT   |
| V  | a   | s     | idia   | group    | amily      | _Genus       | ACTGACACTGAGGCACGAAAGCGTGGGGAGCAAACAGG                                   |

|    |     |       |        |          |            |              |                                                                             |
|----|-----|-------|--------|----------|------------|--------------|-----------------------------------------------------------------------------|
| 25 |     |       |        |          |            |              |                                                                             |
| 5  |     |       |        |          |            |              |                                                                             |
| A  |     |       |        |          |            |              |                                                                             |
| S  | Ba  |       |        | Clostrid | Clostridia | Clostridia_v | TACGTAGGAGGCAAGCGTTATCCGGAATGACTGGGCGTAAAGGGTGCGTAGGTGGTTTGGCAAGTTGGTAGC    |
| V  | ct  | Firm  |        | ia_vadi  | _vadinBB6  | adinBB60_gr  | GTAATTCGGGGGCTCAACCTCGGCGCTACTACCAAACTGCTGGACTTGAGTGCAGGAGGGGTGAATGGAAT     |
| 32 | eri | icute | Clostr | nBB60_   | 0_group_F  | oup_Family   | TCCTAGTGTAGCGGTGGAATGCGTAGATATTAGGAAGAACACCAGTCGGCGAAGGCGATTCACTGGACTGTA    |
| 9  | a   | s     | idia   | group    | amily      | _Genus       | ACTGACACTGAGGCACGAAAGCGTGGGGAGCAAACAGG                                      |
| A  |     |       |        |          |            |              |                                                                             |
| S  | Ba  |       |        |          | Clostridia | Clostridia_U | TACGTAGGGAGCGAGCGTTATCCGGAATTATTGGGTGTAAAGGGTGCGTAGACGGGAAAAGCAAGTTAGTTGT   |
| V  | ct  | Firm  |        | Clostrid | _UCG-      | CG-          | GAAATCCCTCGGCTTAACCTGAGGAACTGCAACTAAAACACTATTTTCTTGAGTGCAGGAGAGGTAAGTGGAAAT |
| 14 | eri | icute | Clostr | ia_UCG   | 014_Famil  | 014_Family_  | TCCTAGTGTAGCGGTGAAATGCGTAGATATTAGGAGGAACACCAGTGGCGAAGGCGACTTACTGGACTGTA     |
| 6  | a   | s     | idia   | -014     | y          | Genus        | ACTGACGTTGAGGCACGAAAGTGTGGGGAGCAAACAGG                                      |
| A  |     |       |        |          |            |              |                                                                             |
| S  | Ba  |       |        |          | Clostridia | Clostridia_U | TACGTAGGGAGCGAGCGTTATCCGGAATTATTGGGTGTAAAGGGTGCGTAGACGGGAAAAACAAGTTAGTTG    |
| V  | ct  | Firm  |        | Clostrid | _UCG-      | CG-          | TGAAATCCCTCGGCTTAACCTGAGGAACTGCAACTAAAACACTATTTTCTTGAGTGCAGGAGAGGTAAGTGGAA  |
| 20 | eri | icute | Clostr | ia_UCG   | 014_Famil  | 014_Family_  | TTCTAGTGTAGCGGTGAAATGCGTAGATATTAGGAGGAACACCAGTGGCGAAGGCGACTTACTGGACTGTA     |
| 1  | a   | s     | idia   | -014     | y          | Genus        | ACTGACGTTGAGGCACGAAAGTGTGGGGAGCAAACAGG                                      |
| A  |     |       |        |          |            |              |                                                                             |
| S  | Ba  |       |        |          | Clostridia | Clostridia_U | TACGTAGGGAGCGAGCGTTATCCGGAATTATTGGGTGTAAAGGGTGCGTAGACGGGAAAAACAAGTTAGTTGT   |
| V  | ct  | Firm  |        | Clostrid | _UCG-      | CG-          | GAAATCCCTCGGCTTAACCTGAGGAACTGCAACTAAAACACTATTTTCTTGAGTGCAGGAGAGGTAAGTGGAAAT |
| 28 | eri | icute | Clostr | ia_UCG   | 014_Famil  | 014_Family_  | TCCTAGTGTAGCGGTGAAATGCGTAGATATTAGGAGGAACACCAGTGGCGAAGGCGACTTACTGGACTGTA     |
| 3  | a   | s     | idia   | -014     | y          | Genus        | ACTGACGTTGAGGCACGAAAGTGTGGGGAGCAAACAGG                                      |
| A  |     |       |        |          |            |              |                                                                             |
| S  | Ba  |       |        |          | Clostridia | Clostridia_U | TACGTAGGGAGCAAGCGTTATCCGGAATTATTGGGTGTAAAGGGTGCGTAGACGGGCTAACAAGTTAGTTGT    |
| V  | ct  | Firm  |        | Clostrid | _UCG-      | CG-          | GAAATCCCTCGGCTTAACCTGAGGAACTGCAACTAAAACACTATTAGTCTCTGAGTGCGGGAGAGGAAAGTGGAA |
| 16 | eri | icute | Clostr | ia_UCG   | 014_Famil  | 014_Family_  | ATTCTAGTGTAGCGGTGAAATGCGTAGATATTAGGAGGAACACCAGTGGCGAAGGCGACTTTCTGGACCGT     |
| 2  | a   | s     | idia   | -014     | y          | Genus        | AACTGACGTTGAGGCACGAAAGTGTGGGGAGCAAACAGG                                     |
| A  |     |       |        |          |            |              |                                                                             |
| S  | Ba  |       |        |          | Clostridia | Clostridia_U | TACGTAGGGAGCAAGCGTTATCCGGAATTATTGGGTGTAAAGGGTGCGTAGACGGGAAAAACAAGTTAGTTGT   |
| V  | ct  | Firm  |        | Clostrid | _UCG-      | CG-          | GAAATCCCTCAGCTTAACCTGAGGAACTGCAACTAAAACACTATTTTCTTGAGTGCTGGAGAGGAAAGTGGAAAT |
| 24 | eri | icute | Clostr | ia_UCG   | 014_Famil  | 014_Family_  | TCCTAGTGTAGCGGTGAAATGCGTAGATATTAGGAGGAACACCAGTGGCGAAGGCGACTTTCTGGACAGTA     |
| 1  | a   | s     | idia   | -014     | y          | Genus        | ACTGACGTTGAGGCACGAAAGTGTGGGGAGCAAACAGG                                      |
| A  |     |       |        |          |            |              |                                                                             |
| S  | Ba  |       |        |          | Clostridia | Clostridia_U | TACATAGGGAGCGAGCGTTATCCGGAATTATTGGGTGTAAAGGGTGCGTAGACGGGAATACAAGTTGGTTGT    |
| V  | ct  | Firm  |        | Clostrid | _UCG-      | CG-          | GAAATCCCTCGGCTCAACCGAGGAACTGCAACCAAACTATATTTCTTGAGTACTGGAGAGGAAAGTGGAA      |
| 21 | eri | icute | Clostr | ia_UCG   | 014_Famil  | 014_Family_  | TTCTAGTGTAGCGGTGAAATGCGTAGATATTAGGAGGAACACCAGTGGCGAAGGCGACTTTCTGGACAGA      |
| 7  | a   | s     | idia   | -014     | y          | Genus        | AACTGACGTTGAGGCACGAAAGTGTGGGGAGCAAACAGG                                     |
| A  |     |       |        |          |            |              |                                                                             |
| S  | Ba  |       |        |          | Clostridia | Clostridia_U | TACATAGGGAGCGAGCGTTATCCGGAATTATTGGGTGTAAAGGGTGCGTAGACGGGAATACAAGTTGGTTGT    |
| V  | ct  | Firm  |        | Clostrid | _UCG-      | CG-          | GAAAGCCCTCGGCTTAACCGAGGAACTGCAACCGAACTATATTTCTTGAGTATCGGAGAGGAAAGTGGAA      |
| 36 | eri | icute | Clostr | ia_UCG   | 014_Famil  | 014_Family_  | TTCTAGTGTAGCGGTGAAATGCGTAGATATTAGGAGGAACACCAGTGGCGAAGGCGACTTTCTGGACGAA      |
| 4  | a   | s     | idia   | -014     | y          | Genus        | AACTGACGTTGAGGCACGAAAGTGTGGGGAGCAAACAGG                                     |

|    |     |       |        |        |            |              |                                                                          |
|----|-----|-------|--------|--------|------------|--------------|--------------------------------------------------------------------------|
| A  | S   | Ba    |        |        | Clostridia | Clostridia_U | TACGTAGGGAGCGAGCGTTATCCGGATTTATTGGGTGTAAAGGGTGCGTAGACGGGTATACAAGTTGGTTGT |
|    | V   | ct    | Firm   |        | _UCG-      | CG-          | GAAATCCCTCGGCTTAAGTGAAGAACTGCAACCAAACTGTATATCTTGAGTACAGGAGAGGTAAGTGGAA   |
| 34 | eri | icute | Clostr | ia_UCG | 014_Famil  | 014_Family_  | TTCCTAGTGTAGCGGTGAAATGCGTAGATATTAGGAGGAACACCAGTGGCGAAGGCGACTTACTGGACTGA  |
| 0  | a   | s     | idia   | -014   | y          | Genus        | AACTGACGTTGAGGCACGAAAGTGTGGGGAGCAAACAGG                                  |
| A  | S   | Ba    |        |        | Clostridia | Clostridia_U | TACGTAGGGAGCAAGCGTTATCCGGATTTATTGGGTGTAAAGGGTGCGTAGATGGATAAACAAGTTGTTTGT |
|    | V   | ct    | Firm   |        | _UCG-      | CG-          | GAAATACCTCGGCTCAACTGAGGAACTGCAAGCAAAACTGTATATCTTGAGTACTGGAGGGGAAAGCGGAA  |
| 18 | eri | icute | Clostr | ia_UCG | 014_Famil  | 014_Family_  | TTCCTAGTGTAGCGGTGAAATGCGTAGATATTAGGAAGAACACCGGTGGCGAAGGCGGCTTTCTGGACAGA  |
| 4  | a   | s     | idia   | -014   | y          | Genus        | AACTGACATTGAGGCACGAAAGTGTGGGGAGCAAACAGG                                  |
| A  | S   | Ba    |        |        | Clostridia | Clostridia_U | TACGTAGGGAGCAAGCGTTATCCGGATTTATTGGGTGTAAAGGGTGCGTAGACGGGAAGGCAAGTTGGTTGT |
|    | V   | ct    | Firm   |        | _UCG-      | CG-          | GAAATCCCTCGGCTTAAGTGAAGAACTGCAACCAAACTATCTTTCTTGAGTGCTGGAGAGGAAAGTGGAAAT |
| 13 | eri | icute | Clostr | ia_UCG | 014_Famil  | 014_Family_  | TCCTAGTGTAGCGGTGAAATGCGTAGATATTAGGAGGAACACCAGTGGCGAAGGCGACTTTCTGGACAGTA  |
| 9  | a   | s     | idia   | -014   | y          | Genus        | ACTGACGTTGAGGCACGAAAGTGTGGGGAGCAAACAGG                                   |
| A  | S   | Ba    |        |        | Clostridia | Clostridia_U | TACGTAGGGAGCAAGCGTTATCCGGATTTATTGGGTGTAAAGGGTGCGTAGACGGGAAGGCAAGTTAGTTGT |
|    | V   | ct    | Firm   |        | _UCG-      | CG-          | GAAATCCCTCGGCTTAAGTGAAGAACTGCAACTAAAACATCTTTCTTGAGTGCTGGAGAGGAAAGTGGAAAT |
| 12 | eri | icute | Clostr | ia_UCG | 014_Famil  | 014_Family_  | TCCTAGTGTAGCGGTGAAATGCGTAGATATTAGGAGGAACACCAGTGGCGAAGGCGACTTTCTGGACAGTA  |
| 1  | a   | s     | idia   | -014   | y          | Genus        | ACTGACGTTGAGGCACGAAAGTGTGGGGAGCAAACAGG                                   |
| A  | S   | Ba    |        |        | Clostridia | Clostridia_U | TACGTAGGGAGCAAGCGTTATCCGGATTTATTGGGTGTAAAGGGTGCGTAGACGGGAAGTCAAGTTAGTTGT |
|    | V   | ct    | Firm   |        | _UCG-      | CG-          | GAAATCCCTCGGCTTAAGTGAAGAACTGCAACTAAAACATCTTTCTTGAGTGCTGGAGAGGAAAGTGGAAAT |
| 31 | eri | icute | Clostr | ia_UCG | 014_Famil  | 014_Family_  | TCCTAGTGTAGCGGTGAAATGCGTAGATATTAGGAGGAACACCAGTGGCGAAGGCGACTTTCTGGACAGTA  |
| 6  | a   | s     | idia   | -014   | y          | Genus        | ACTGACGTTGAGGCACGAAAGTGTGGGGAGCAAACAGG                                   |
| A  | S   | Ba    |        |        | Clostridia | Clostridia_U | TACGTAGGGAGCAAGCGTTATCCGGATTTATTGGGTGTAAAGGGTGCGTAGACGGGAAGGCAAGTTGGTTGT |
|    | V   | ct    | Firm   |        | _UCG-      | CG-          | GAAATCCCTCGGCTTAAGTGAAGAACTGCAACCAAACTATCTTTCTTGAGTGCTGGAGAGGAAAGTGGAAAT |
| 33 | eri | icute | Clostr | ia_UCG | 014_Famil  | 014_Family_  | TCCTAGTGTAGCGGTGAAATGCGTAGATATTAGGAGGAACACCAGTGGCGAAGGCGACTTTCTGGACAGTA  |
| 9  | a   | s     | idia   | -014   | y          | Genus        | ACTGACGTTGAGGCACGAAAGTGTGGGGAGCAAACAGG                                   |
| A  | S   | Ba    |        |        | Clostridia | Clostridia_U | TACGTAGGGAGCAAGCGTTATCCGGATTTATTGGGTGTAAAGGGTGCGTAGACGGGAAGGCAAGTTGGTTGT |
|    | V   | ct    | Firm   |        | _UCG-      | CG-          | GAAATCCCTCGGCTTAAGTGAAGAACTGCAACCAAACTACATTTCTTGAGTGCTGGAGAGGAAAGTGGAA   |
| 13 | eri | icute | Clostr | ia_UCG | 014_Famil  | 014_Family_  | TTCCTAGTGTAGCGGTGAAATGCGTAGATATTAGGAGGAACACCAGTGGCGAAGGCGACTTTCTGGACAGTA |
| 4  | a   | s     | idia   | -014   | y          | Genus        | ACTGACGTTGAGGCACGAAAGTGTGGGGAGCAAACAGG                                   |
| A  | S   | Ba    |        |        | Clostridia | Clostridia_U | TACGTAGGGAGCAAGCGTTATCCGGATTTATTGGGTGTAAAGGGTGCGTAGACGGGAATGCAAGTTAGTTGT |
|    | V   | ct    | Firm   |        | _UCG-      | CG-          | GAAATCCCTCGGCTTAAGTGAAGAACTGCAACTAAAACATCTTTCTTGAGTGCTGGAGAGGAAAGTGGAAAT |
| 20 | eri | icute | Clostr | ia_UCG | 014_Famil  | 014_Family_  | TCCTAGTGTAGCGGTGAAATGCGTAGATATTAGGAGGAACACCAGTGGCGAAGGCGACTTTCTGGACAGTA  |
| 6  | a   | s     | idia   | -014   | y          | Genus        | ACTGACGTTGAGGCACGAAAGTGTGGGGAGCAAACAGG                                   |
| A  | S   | Ba    |        |        | Clostridia | Clostridia_U | TACGTAGGGAGCAAGCGTTATCCGGATTTATTGGGTGTAAAGGGTGCGTAGACGGGAATGCAAGTTAGTTGT |
|    | V   | ct    | Firm   |        | _UCG-      | CG-          | GAAATCCCTCGGCTTAAGTGAAGAACTGCAACCAAACTACATTTCTTGAGTGCTGGAGAGGAAAGTGGAA   |
| 13 | eri | icute | Clostr | ia_UCG | 014_Famil  | 014_Family_  | TTCCTAGTGTAGCGGTGAAATGCGTAGATATTAGGAGGAACACCAGTGGCGAAGGCGACTTTCTGGACAGTA |
| 4  | a   | s     | idia   | -014   | y          | Genus        | ACTGACGTTGAGGCACGAAAGTGTGGGGAGCAAACAGG                                   |

|    |     |       |            |            |              |                                                                           |  |
|----|-----|-------|------------|------------|--------------|---------------------------------------------------------------------------|--|
| 34 |     |       |            |            |              |                                                                           |  |
| 6  |     |       |            |            |              |                                                                           |  |
| A  |     |       |            |            |              |                                                                           |  |
| S  | Ba  |       |            | Clostridia | Clostridia_U | TACGTAGGGAGCAAGCGTTATCCGGATTTATTGGGTGTAAAGGGTGCGTAGACGGGAAGACAAGTTGGTTGT  |  |
| V  | ct  | Firm  |            | _UCG-      | CG-          | GAAATCCCTCGGCTTAAGTGAAGAACTGCAACCAAACTATCTTCTTGAGTGCTGGAGAGGAAAAGTGGAAAT  |  |
| 39 | eri | icute | Clostridia | 014_Famil  | 014_Family_  | TCCTAGTGTAGCGGTGAAATGCGTAGATATTAGGAGGAACACCAGTGGCGAAGGCGACTTTCTGGACAGTA   |  |
| 0  | a   | s     | -014       | y          | Genus        | ACTGACGTTGAGGCACGAAAGTGTGGGGAGCAAACAGG                                    |  |
| A  |     |       |            |            |              |                                                                           |  |
| S  | Ba  |       |            | Clostridia | Clostridia_U | TACGTAGGGAGCAAGCGTTATCCGGATTTATTGGGTGTAAAGGGTGCGTAGACGGGAAAACAAGTTGGTTGT  |  |
| V  | ct  | Firm  |            | _UCG-      | CG-          | GAAATCCCTCGGCTTAAGTGAAGAACTGCAACCAAACTATTTTCTTGAGTGCTGGAGAGGAAAAGTGGAAAT  |  |
| 30 | eri | icute | Clostridia | 014_Famil  | 014_Family_  | TCCTAGTGTAGCGGTGAAATGCGTAGATATTAGGAGGAACACCAGTGGCGAAGGCGACTTTCTGGACAGTA   |  |
| 0  | a   | s     | -014       | y          | Genus        | ACTGACGTTGAGGCACGAAAGTGTGGGGAGCAAACAGG                                    |  |
| A  |     |       |            |            |              |                                                                           |  |
| S  | Ba  |       |            | Clostridia | Clostridia_U | TACATAGGGAGCAAGCGTTATCCGGATTTATTGGGTGTAAAGGGTGCGTAGACGGGAAAATTAAGTTAGTTGT |  |
| V  | ct  | Firm  |            | _UCG-      | CG-          | GAAATCCCTCGGCTTAAGTGAAGAACTGCAACTAAAAGTATTTTCTTGAGTACTGGAGAGGAAAAGTGGAAAT |  |
| 18 | eri | icute | Clostridia | 014_Famil  | 014_Family_  | TCCTAGTGTAGCGGTGAAATGCGTAGATATTAGGAGGAACACCAGTGGCGAAGGCGACTTTCTGGACAGTA   |  |
| 5  | a   | s     | -014       | y          | Genus        | ACTGACGTTGAGGCACGAAAGTGTGGGGAGCAAACAGG                                    |  |
| A  |     |       |            |            |              |                                                                           |  |
| S  | Ba  |       |            | Clostridia | Clostridia_U | TACATAGGGGGCGAGCGTTATCCGGAATTATTGGGTGTAAAGGGTGCGTAGACGGGAAAATTAAGTTAGTTGT |  |
| V  | ct  | Firm  |            | _UCG-      | CG-          | GAAATCCCTTGGCTTAAGTGAAGAACTGCAACTAAAAGTATTTTCTTGAGTATTGGAGAGGAAAAGTGGAAAT |  |
| 20 | eri | icute | Clostridia | 014_Famil  | 014_Family_  | TCCTAGTGTAGCGGTGAAATGCGTAGATATTAGGAGGAACACCAGTGGCGAAGGCGACTTTCTGGACAAAA   |  |
| 3  | a   | s     | -014       | y          | Genus        | ACTGACGTTGAGGCACGAAAGTGTGGGGAGCAAACAGG                                    |  |
| A  |     |       |            |            |              |                                                                           |  |
| S  | Ba  |       |            | Clostridia | Clostridia_U | TACATAGGGGGCAAGCGTTATCCGGAATTATTGGGTGTAAAGGGTGCGTAGACGGGAAAATTAAGTTAGTTGT |  |
| V  | ct  | Firm  |            | _UCG-      | CG-          | GAAATACCTTGGCTCAACTAAGGAAGTCAACTAAAAGTGGTTTCTTGAGTACTGGAGAGGAAAAGTGGAAAT  |  |
| 32 | eri | icute | Clostridia | 014_Famil  | 014_Family_  | TCCTAGTGTAGCGGTGAAATGCGTAGATATTAGGAGGAACACCAGTGGCGAAGGCGACTTTCTGGACAGAA   |  |
| 4  | a   | s     | -014       | y          | Genus        | ACTGACGTTGAGGCACGAAAGTGTGGGGAGCAAACAGG                                    |  |
| A  |     |       |            |            |              |                                                                           |  |
| S  | Ba  |       |            | Clostridia | Clostridia_U | TACGTAGGGAGCAAGCGTTATCCGGATTTATTGGGTGTAAAGGGTGCGTAGACGGGAATTTAAGTTAGTTGT  |  |
| V  | ct  | Firm  |            | _UCG-      | CG-          | GAAATCCCTCGGCTCAACTGAGGAAGTCAACTAAAAGTGGATTCTTGAGTGCTGGAGAGGAAAAGCGGAA    |  |
| 36 | eri | icute | Clostridia | 014_Famil  | 014_Family_  | TTCTAGTGTAGCGGTGAAATGCGTAGATATTAGGAGGAACACCAGTGGCGAAGGCGGCTTTCTGGACAGTA   |  |
| 7  | a   | s     | -014       | y          | Genus        | ACTGACGTTGAGGCACGAAAGTGTGGGGAGCAAACAGG                                    |  |
| A  |     |       |            |            |              |                                                                           |  |
| S  | Ba  |       |            | Clostridia | Clostridia_U | TACATAGGGAGCGAGCGTTATCCGGATTTATTGGGTGTAAAGGGTGCGTAGACGGGAATTTAAGTTGGTTGT  |  |
| V  | ct  | Firm  |            | _UCG-      | CG-          | GAAATCCCTCAGCTCAACTGAGGAAGTCAACCAAAAGTGGATTCTTGAGTGCTGGAGAGGAAAAGTGGAA    |  |
| 15 | eri | icute | Clostridia | 014_Famil  | 014_Family_  | TTCTAGTGTAGCGGTGAAATGCGTAGATATTAGGAGGAACACCAGTGGCGAAGGCGACTTTCTGGACAGTA   |  |
| 7  | a   | s     | -014       | y          | Genus        | ACTGACGTTGAGGCACGAAAGTGTGGGGAGCAAACAGG                                    |  |
| A  |     |       |            |            |              |                                                                           |  |
| S  | Ba  |       |            | Clostridia | Clostridia_U | TACATAGGGAGCAAGCGTTATCCGGATTTATTGGGTGTAAAGGGTGCGTAGACGGGAATTTAAGTTGGTTGT  |  |
| V  | ct  | Firm  |            | _UCG-      | CG-          | GAAAGCCCTCGGCTCAACTGAGGAAGTCAACCAAAAGTGGATTCTTGAGTATTGGAGAGGAAAAGTGGAA    |  |
| 31 | eri | icute | Clostridia | 014_Famil  | 014_Family_  | TTCTAGTGTAGCGGTGAAATGCGTAGATATTAGGAGGAACACCAGTGGCGAAGGCGGCTTTCTGGACAATA   |  |
| 3  | a   | s     | -014       | y          | Genus        | ACTGACGTTGAGGCACGAAAGTGTGGGGAGCAAACAGG                                    |  |

|    |     |       |        |        |            |              |                                                                            |
|----|-----|-------|--------|--------|------------|--------------|----------------------------------------------------------------------------|
| A  | S   | Ba    |        |        | Clostridia | Clostridia_U | TACGTAGGGAGCAAGCGTTATCCGGATTTATTGGGTGTAAAGGGTGCGTAGACGGGAATTTAAGTTAGTTGT   |
|    | V   | ct    | Firm   |        | _UCG-      | CG-          | GAAATCCCTCGGCTTAAGTGAAGAACTGCAACTAAAGTGAATTTCTTGAGTGCGGGAGAGGAAAGTGGAA     |
| 17 | eri | icute | Clostr | ia_UCG | 014_Famil  | 014_Family_  | TTCCTAGTGTAGCGGTGAAATGCGTAGATATTAGGAGGAACACCAGTGGCGAAGGCGACTTTCTGGACCGTA   |
| 2  | a   | s     | idia   | -014   | y          | Genus        | ACTGACGTTGAGGCACGAAAGTGTGGGGAGCAAACAGG                                     |
| A  | S   | Ba    |        |        | Clostridia | Clostridia_U | TACGTAGGGAGCAAGCGTTATCCGGAAATTATTGGGTGTAAAGGGTGCGTAGACGGGAAAAATAAGTTAGTTGT |
|    | V   | ct    | Firm   |        | _UCG-      | CG-          | GAAATCCCTCGGCTCAACTGAGGAACTGCAACTAAAGTGAATTTCTTGAGTGACAGGAGAGGAAAGTGGAA    |
| 36 | eri | icute | Clostr | ia_UCG | 014_Famil  | 014_Family_  | TTCCTAGTGTAGCGGTGAAATGCGTAGATATTAGGAGGAACACCAGTGGCGAAGGCGACTTTCTGGACTGTA   |
| 1  | a   | s     | idia   | -014   | y          | Genus        | ACTGACGTTGAGGCACGAAAGTGTGGGGAGCAAACAGG                                     |
| A  | S   | Ba    |        |        | Clostridia | Clostridia_U | TACGTAGGGAGCAAGCGTTATCCGGAAATTATTGGGTGTAAAGGGTGCGTAGACGGGAGTCTAAGTTAGTTGT  |
|    | V   | ct    | Firm   |        | _UCG-      | CG-          | GAAATCCCTCGGCTCAACTGAGGAACTGCAACTAAAGTGGGCATCTTGAGTGACAGGAGAGGAAAGTGGAA    |
| 29 | eri | icute | Clostr | ia_UCG | 014_Famil  | 014_Family_  | TTCCTAGTGTAGCGGTGAAATGCGTAGATATTAGGAGGAACACCAGTGGCGAAGGCGACTTTCTGGACTGTA   |
| 1  | a   | s     | idia   | -014   | y          | Genus        | ACTGACGTTGAGGCACGAAAGTGTGGGGAGCAAACAGG                                     |
| A  | S   | Ba    |        |        | Clostridia | Clostridia_U | TACGTAGGGAGCGAGCGTTATCCGGAAATTATTGGGTGTAAAGGGTGCGTAGACGGGTAAATAAGTTAGTTGT  |
|    | V   | ct    | Firm   |        | _UCG-      | CG-          | GAAATCCCTCGGCTCAACTGAGGAACTGCAACTAAAGTGTATATCTTGAGTGCGGGAGAGGAAAGTGGAA     |
| 38 | eri | icute | Clostr | ia_UCG | 014_Famil  | 014_Family_  | TTCCTAGTGTAGCGGTGAAATGCGTAGATATTAGGAGGAACACCAGTGGCGAAGGCGACTTTCTGGACCGTA   |
| 6  | a   | s     | idia   | -014   | y          | Genus        | ACTGACGTTGAGGCACGAAAGTGTGGGGAGCAAACAGG                                     |
| A  | S   | Ba    |        |        | Clostridia | Clostridia_U | TACGTAGGGAGCAAGCGTTATCCGGATTTATTGGGTGTAAAGGGTGCGTAGACGGGTATATAAGTTAGTTGT   |
|    | V   | ct    | Firm   |        | _UCG-      | CG-          | GAAATCCCTCGGCTCAACTGAGGAACTGCAACTAAAGTGTAAATCTTGAGTGCGGGAGAGGAAAGTGGAA     |
| 27 | eri | icute | Clostr | ia_UCG | 014_Famil  | 014_Family_  | TTCCTAGTGTAGCGGTGAAATGCGTAGATATTAGGAGGAACACCAGTGGCGAAGGCGACTTTCTGGACCGTA   |
| 4  | a   | s     | idia   | -014   | y          | Genus        | ACTGACGTTGAGGCACGAAAGTGTGGGGAGCAAACAGG                                     |
| A  | S   | Ba    |        |        | Clostridia | Clostridia_U | TACGTAGGGAGCAAGCGTTATCCGGATTTATTGGGTGTAAAGGGTGCGTAGACGGGAAAAACAAGTTAGTTGT  |
|    | V   | ct    | Firm   |        | _UCG-      | CG-          | GAAATCCCTCGGCTTAAGTGAAGAACTGCAACTAAAGTATTTTTCTTGAGTGCTGGAGAGGAAAGTGGAA     |
| 19 | eri | icute | Clostr | ia_UCG | 014_Famil  | 014_Family_  | TCCTAGTGTAGCGGTGAAATGCGTAGATATTAGGAGGAACACCAGTGGCGAAGGCGACTTTCTGGACAGTA    |
| 8  | a   | s     | idia   | -014   | y          | Genus        | ACTGACGTTGAGGCACGAAAGTGTGGGGAGCAAACAGG                                     |
| A  | S   | Ba    |        |        | Clostridia | Clostridia_U | TACATAGGGGGCAAGCGTTATCCGGATTTATTGGGTGTAAAGGGTGCGTAGACGGAGAAAAACAAGTTGGTTGT |
|    | V   | ct    | Firm   |        | _UCG-      | CG-          | GAAATCCCTCGGCTCAACTGAGGAACTGCAACCAAAACTATTTCCCTTGAGTGTCGGAGAGGAAAGTGGAA    |
| 26 | eri | icute | Clostr | ia_UCG | 014_Famil  | 014_Family_  | TTCCTAGTGTAGCGGTGAAATGCGTAGATATTAGGAGGAACACCGGTGGCGAAGGCGACTTTCTGGACGATA   |
| 0  | a   | s     | idia   | -014   | y          | Genus        | ACTGACGTTGAGGCACGAAAGTGTGGGGAGCAAACAGG                                     |
| A  | S   | Ba    |        |        | Clostridia | Clostridia_U | TACGTAGGGAGCAAGCGTTATCCGGATTTATTGGGTGTAAAGGGTGCGTAGACGGAGAAAGCAAGTTAGTTGT  |
|    | V   | ct    | Firm   |        | _UCG-      | CG-          | GAAATCCCTCGGCTTAAGTGAAGAACTGCAACTAAAGTACTTCCCTTGAGTGTTGGAGAGGAAAGTGGAA     |
| 39 | eri | icute | Clostr | ia_UCG | 014_Famil  | 014_Family_  | TCCTAGTGTAGCGGTGAAATGCGTAGATATTAGGAGGAACACCAGTGGCGAAGGCGACTTTCTGGACAATA    |
| 2  | a   | s     | idia   | -014   | y          | Genus        | ACTGACGTTGAGGCACGAAAGTGTGGGGAGCAAACAGG                                     |
| A  | S   | Ba    |        |        | Clostridia | Clostridia_U | TACGTAGGGAGCAAGCGTTATCCGGAAATTATTGGGTGTAAAGGGTGCGTAGACGGGAATACAAGTTAGTTGT  |
|    | V   | ct    | Firm   |        | _UCG-      | CG-          | GAAAGCCCTCGGCTTAAGTGAAGAACTGCAACTAAAGTATATTTCTTGAGTGACAGGAGAGGAAAGCGGAA    |
| 3  | eri | icute | Clostr | ia_UCG | 014_Famil  | 014_Family_  | TTCCTAGTGTAGCGGTGAAATGCGTAGATATTAGGAGGAACACCAGTGGCGAAGGCGGCTTTCTGGACTGTA   |
| S  | a   | s     | idia   | -014   | y          | Genus        | ACTGACGTTGAGGCACGAAAGTGTGGGGAGCAAACAGG                                     |

|    |     |       |            |            |              |                                                                           |  |
|----|-----|-------|------------|------------|--------------|---------------------------------------------------------------------------|--|
| 26 |     |       |            |            |              |                                                                           |  |
| 8  |     |       |            |            |              |                                                                           |  |
| A  |     |       |            |            |              |                                                                           |  |
| S  | Ba  | Firm  |            | Clostridia | Clostridia_U | TACGTAGGGAGCAAGCGTTATCCGGAATTATTGGGTGTAAAGGGTGCGTAGACGGGACAGCAAGTTAGTTGT  |  |
| V  | ct  | icute |            | _UCG-      | CG-          | GAAAGCCCTCGGCTTAAGTGAAGAACTGCAACTAAAACTATTGTTCTTGAGTGCAGGAGAGGAAAGCGGAA   |  |
| 37 | eri | s     | Clostridia | 014_Famil  | 014_Family_  | TTCCTAGTGTAGCGGTGAAATGCGTAGATATTAGGAGGAACACCAGTGCGGAAGGCGGCTTTCTGGACTGTA  |  |
| 7  | a   |       |            | y          | Genus        | ACTGACGTTGAGGCACGAAAGTGTGGGGAGCAAACAGG                                    |  |
| A  |     |       |            |            |              |                                                                           |  |
| S  | Ba  | Firm  |            | Clostridia | Clostridia_U | TACGTAGGGAGCAAGCGTTATCCGGAATTATTGGGTGTAAAGGGTGCGTAGACGGGATAACAAGTTGGTTGT  |  |
| V  | ct  | icute |            | _UCG-      | CG-          | GAAACCCCTCGGCTCAACTGAGGAACTGCAACCAAACTATTATTCTTGAGTGCAGGAGAGGAAAGTGGAA    |  |
| 21 | eri | s     | Clostridia | 014_Famil  | 014_Family_  | TTCCTAGTGTAGCGGTGAAATGCGTAGATATTAGGAAGAACACCGGTGGCGAAGGCGACTTTCTGGACTGTA  |  |
| 2  | a   |       |            | y          | Genus        | ACTGACGTTGAGGCACGAAAGTGTGGGGAGCAAACAGG                                    |  |
| A  |     |       |            |            |              |                                                                           |  |
| S  | Ba  | Firm  |            | Clostridia | Clostridia_U | TACGTAGGGAGCAAGCGTTATCCGGAATTTATTGGGTGTAAAGGGTGCGTAGACGGGATTACAAGTTGGTTGT |  |
| V  | ct  | icute |            | _UCG-      | CG-          | GAAACCCCTCAGCTCAACTGAGGAACTGCAACCAAACTATAATTCTTGAGTGCAGGAGAGGAAAGTGGAA    |  |
| 41 | eri | s     | Clostridia | 014_Famil  | 014_Family_  | TTCCTAGTGTAGCGGTGAAATGCGTAGATATTAGGAGGAACACCAGTGCGGAAGGCGGCTTGCTGGACGGT   |  |
| 4  | a   |       |            | y          | Genus        | GACTGACGCTGAGGCTCGAAAGCGTGGGGAGCAAACAGG                                   |  |
| A  |     |       |            |            |              |                                                                           |  |
| S  | Ba  | Firm  |            | Clostridia | Clostridia_U | TACGTAGGGAGCAAGCGTTATCCGGAATTTATTGGGTGTAAAGGGTGCGTAGACGGGATTACAAGTTGGTTGT |  |
| V  | ct  | icute |            | _UCG-      | CG-          | GAAACCCCTCAGCTCAACTGAGGAACTGCAACCAAACTATAATTCTTGAGTGCAGGAGAGGAAAGTGGAA    |  |
| 32 | eri | s     | Clostridia | 014_Famil  | 014_Family_  | TTCCTAGTGTAGCGGTGAAATGCGTAGATATTAGGAAGAACACCGGTGGCGAAGGCGACTTTCTGGACTGTA  |  |
| 8  | a   |       |            | y          | Genus        | ACTGACGTTGAGGCACGAAAGTGTGGGGAGCAAACAGG                                    |  |
| A  |     |       |            |            |              |                                                                           |  |
| S  | Ba  | Firm  |            | Clostridia | Clostridia_U | TACGTAGGGAGCAAGCGTTATCCGGAATTTATTGGGTGTAAAGGGTGCGTAGACGGGATAACAAGTTGGTTGT |  |
| V  | ct  | icute |            | _UCG-      | CG-          | GAAACCCCTCGGCTCAACTGAGGAACTGCAACCAAACTATTATTCTTGAGTGCAGGAGAGGAAAGTGGAA    |  |
| 42 | eri | s     | Clostridia | 014_Famil  | 014_Family_  | TTCCTAGTGTAGCGGTGAAATGCGTAGATATTAGGAGGAACACCAGTGCGGAAGGCGGCTTACTGGACTGTA  |  |
| 3  | a   |       |            | y          | Genus        | ACTGACGTTGAGGCTCGAAAGCGTGGGGAGCAAACAGG                                    |  |
| A  |     |       |            |            |              |                                                                           |  |
| S  | Ba  | Firm  |            | Clostridia | Clostridia_v | TACGTAGGGGGCGAGCGTTGTCCGGAATGACTGGGCGTAAAGGGAGTGTAGGCGGCTGTGCAAGTTAGATG   |  |
| V  | ct  | icute |            | _vadinBB6  | adinBB60_gr  | TGAAATCCCATGGCTTAACCATGGAAGTGCATCTAAAAGTGCATAGCTGGAGTGCAGGAGAGGTGAGTGGAA  |  |
| 31 | eri | s     | Clostridia | nBB60_     | oup_Family_  | ATTCTAGTGTAGCGGTGGAATGCGTAGATATTAGGAGGAACACCAGAGGCGAAGGCGACTCACTGGACTG    |  |
| 2  | a   |       | group      | family     | _Genus       | TAACTGACGCTGAGGCTCGAAAGCGTGGGGAGCAAACAGG                                  |  |
| A  |     |       |            |            |              |                                                                           |  |
| S  | Ba  | Firm  |            | Clostridia | Clostridia_v | TACGTAGGGGGCAAGCGTTGTCCGGAATGACTGGGCGTAAAGGGAGTGTAGGCGGCTTATCAAGTTAGATG   |  |
| V  | ct  | icute |            | _vadinBB6  | adinBB60_gr  | TGAAATCCCGCGGCTTAACCGCGGAAGTGCATCTAAAAGTGGTGGAGTGCAGGAGAGGTGAGTGGAA       |  |
| 21 | eri | s     | Clostridia | nBB60_     | oup_Family_  | ATTCTAGTGTAGCGGTGGAATGCGTAGATATTAGGAGGAACACCAGAGGCGAAGGCGACTCACTGGACTG    |  |
| 1  | a   |       | group      | family     | _Genus       | TAACTGACGCTGAGGCTCGAAAGCGTGGGGAGCAAACAGG                                  |  |
| A  |     |       |            |            |              |                                                                           |  |
| S  | Ba  | Firm  |            | Clostridia | Clostridia_v | TACGTAGGGGGCAAGCGTTGTCCGGAATGACTGGGCGTAAAGGGAGTGTAGGCGGCTTGTAAAGTTAGATGT  |  |
| V  | ct  | icute |            | _vadinBB6  | adinBB60_gr  | GAAATCCTACGGCTTAACCGTAGAAGTGCATCTAAAAGTGTGAGGCTGGAGTGCAGGAGAGGTGAGTGGAA   |  |
| 27 | eri | s     | Clostridia | nBB60_     | oup_Family_  | TTCCTAGTGTAGCGGTGGAATGCGTAGATATTAGGAGGAACACCAGAGGCGAAGGCGACTCACTGGACTGT   |  |
| 0  | a   |       | group      | family     | _Genus       | AACTGACGCTGAGGCTCGAAAGCGTGGGGAGCAAACAGG                                   |  |

|    |   |     |        |         |           |            |               |                                                                            |
|----|---|-----|--------|---------|-----------|------------|---------------|----------------------------------------------------------------------------|
| A  | S | Ba  |        |         | Clostrid  | Clostridia | Clostridia_v  | TACGTAGGGGGCGAGCGTTGTCCGGAATGACTGGGCGTAAAGGGAGTGTAGGCGGCTCTTTAAGTTATATGT   |
|    | V | ct  | Firm   |         | ia_vadi   | _vadinBB6  | adinBB60_gr   | GAAATCCCGCGGCTTAACCGTGGAAGTGCATATAAACTGGGAGCTGGAGTGCAGGAGAGGTGAGTGGAA      |
| 25 | 1 | eri | icute  | Clostr  | nBB60_    | 0_group_F  | oup_Family    | TTCCTAGTGTAGCGGTGGAATGCGTAGATATTAGGAAGAACACCGGTGGCGAAGGCGGCTCACTGGACTGT    |
| A  |   | a   | s      | idia    | group     | amily      | _Genus        | AACTGACGCTGAGGCTCGAAAGCGTGGGAGCAAACAGG                                     |
| A  | S | Ba  |        |         | Clostrid  | Clostridia | Clostridia_O  | TACGTAGGGGGCGAGCGTTGTCCGGAATGACTGGGCGTAAAGGGAGTGTAGGCGGCTCTTTAAGTTATGTGT   |
|    | V | ct  | Firm   |         | ia_Orde   | _Order_Fa  | order_Family  | GAAAGCCCACGGCTCAACTGTGGAATTGCACATAAACTGGGAGGCTGGAGTGCAGGAGAGGTAAGCGGA      |
| 30 | 6 | eri | icute  | Clostr  | ia_Orde   | _Order_Fa  | _Genus        | ATTTCCAGTGTAGCGGTGGAATGCGTAGATATTGGGAAGAACACCGGAGGCGAAGGCGGCTTACTGGACTG    |
| A  |   | a   | s      | idia    | r         | mily       |               | TAACTGACGCTGAGGCTCGAAAGCGTGGGAGCAAACAGG                                    |
| A  | S | Ba  |        |         | Clostrid  | Clostridia | Clostridia_O  | TACGTAGGGGGCGAGCGTTATCCGGAATGACTGGGCGTAAAGGGAGTGTAGGCGGCTCTTTAAGTTATGTGT   |
|    | V | ct  | Firm   |         | ia_Orde   | _Order_Fa  | order_Family  | GAAAGCCCACGGCTCAACTGTGGAATTGCACATAAACTGGGAGGCTGGAGTGCAGGAGAGGTAAGCGGA      |
| 53 | 1 | eri | icute  | Clostr  | ia_Orde   | _Order_Fa  | _Genus        | ATTTCCAGTGTAGCGGTGGAATGCGTAGATATTGGGAAGAACACCGGAGGCGAAGGCGGCTTACTGGACTG    |
| A  |   | a   | s      | idia    | r         | mily       |               | TAACTGACGCTGAGGCTCGAAAGCGTGGGAGCAAACAGG                                    |
| A  | S | Ba  |        |         |           |            |               | TACGTAGGTGGCAAGCGTTGTTCGGAATAACTGGGCGTAAAGGATGCGTAGGCGGTTAAACAAGTTATATGT   |
|    | V | ct  | Firm   |         |           |            |               | TAAATATATAGGCTTAACCTGTAGAAAGCATATAAACTGTTTAACTAGAGTGCAGGAGAGGTAAGTGGAA     |
| 17 | 5 | eri | icute  | Clostr  | Clostrid  | Clostridia | Candidatus_   | TTCCTAGTGTAGCGGTGAAATGCGTAGAGATTAGGAAGAACACCAGTGGCGAAGGCGACTTACTGGACTGT    |
| A  |   | a   | s      | idia    | iales     | ceae       | Arthromitus   | AACTGACGCTGAGGCATGAGAGCATGGGAGCAAACAGG                                     |
| A  | S | Ba  |        |         | Clostrid  | Clostridia | Clostridia_v  | TACGTAGGGAGCAAGCGTTGTTCGGAATGACTGGGCGTAAAGGGTGCCTAGGCGGTTGTACAAGTTAGAAG    |
|    | V | ct  | Firm   |         | ia_vadi   | _vadinBB6  | adinBB60_gr   | TGAAATACCCAGGGCTTAACCTCGGGTGCTGCTTCTAAAACTGTATGACTTGAGTGCAGTAGAGGTTAGTGA   |
| 16 | 7 | eri | icute  | Clostr  | nBB60_    | 0_group_F  | oup_Family    | ATTCCTAGTGTAGCGGTGGAATGCGTAGATATTAGGAGGAACACCAGAGGCGAAGGCGGCTAACTGGACTG    |
| A  |   | a   | s      | idia    | group     | amily      | _Genus        | CAACTGACGCTGAGGCACGAAAGTGTGGGAGCAAACAGG                                    |
| A  | S | Ba  |        |         | Clostrid  | Clostridia | Clostridia_v  | TACGTAGGGAGCAAGCGTTGTTCGGAATGACTGGGCGTAAAGGGTGCCTAGGCGGTTATACAAGTTAGAAG    |
|    | V | ct  | Firm   |         | ia_vadi   | _vadinBB6  | adinBB60_gr   | TGAAATACCCAGGGCTTAACCTCGGGTGCTGCTTCTAAAACTGTAAGACTTGAGTACAGTAGAGGTTAGTGA   |
| 25 | 9 | eri | icute  | Clostr  | nBB60_    | 0_group_F  | oup_Family    | ATTCCTAGTGTAGCGGTGGAATGCGTAGATATTAGGAGGAACACCAGAGGCGAAGGCGGCTAACTGGACTG    |
| A  |   | a   | s      | idia    | group     | amily      | _Genus        | AAACTGACGCTGAGGCACGAAAGTGTGGGAGCAAACAGG                                    |
| A  | S | Ba  | Acti   |         |           |            |               | TACGTAGGGTGCAAGCGTTATCCGGAATTATTGGGCGTAAAGGGCTCGTAGGCGGTTTCGTCGCGTCCGGTGT  |
|    | V | ct  | noba   | Actin   |           |            |               | GAAAGTCCATCGCTTAACGGTGATCCGCGCCGGGTACGGGCGGGCTTGAGTGCGGTAGGGGAGACTGGAA     |
| 45 | 2 | eri | acteri | obacte  | Bifidoba  | Bifidobact | Bifidobacteri | TTCCCGGTGTAACGGTGGAATGTGTAGATATCGGGAAGAACACCAATGGCGAAGGCAGGTCTCTGGGCCGT    |
| A  |   | a   | ota    | ria     | cteriales | eriaceae   | um            | CACTGACGCTGAGGAGCGAAAGCGTGGGAGCGAACAGG                                     |
| A  | S | Ba  | Acti   |         |           |            |               | TACGTAGGGTGCAAGCGTTATCCGGAATTTATTGGGCGTAAAGGGCTCGTAGGCGGTTTCGTCGCGTCCGGTGT |
|    | V | ct  | noba   | Actin   |           |            |               | GAAAGTCCATCGCTTAACGGTGATCCGCGCCGGGTACGGGCGGGCTTGAGTGCGGTAGGGGAGACTGGAA     |
| 11 | 6 | eri | acteri | obacte  | Bifidoba  | Bifidobact | Bifidobacteri | TTCCCGGTGTAACGGTGGAATGTGTAGATATCGGGAAGAACACCAATGGCGAAGGCAGGTCTCTGGGCCGT    |
|    |   | a   | ota    | ria     | cteriales | eriaceae   | um            | ACTGACGCTGAGGAGCGAAAGCGTGGGAGCGAACAGG                                      |
| A  |   | Ba  |        |         |           |            |               | TACGTAGGTGGCGAGCGTTATCCGGAATTTATTGGGCGTAAAGCGTGCGCAGGCGGCTTATTAAGTCTAAGAT  |
|    |   | ct  | Firm   |         |           |            |               | TAAAGCCCGGAGCTTAACCTCCGGTTCGTCTTAGAAACTGGTAGGCTTGAGTATGGTAGAGGCAAACGGAATT  |
| S  |   | eri | icute  |         |           | RF39_Fam   | RF39_Famil    | CCTAGTGTAGCGGTGGAATGCGTAGATATTAGGAGGAACACCAGTGGCGAAGGCGGTTTGCTGGGCCATTAC   |
| V  |   | a   | s      | Bacilli | RF39      | ily        | y_Genus       | TGACGCTCATGCACGAAAGCGTGGGAGCAAATAGG                                        |

|    |     |       |         |          |            |              |  |  |                                                                           |
|----|-----|-------|---------|----------|------------|--------------|--|--|---------------------------------------------------------------------------|
| 23 |     |       |         |          |            |              |  |  |                                                                           |
| 7  |     |       |         |          |            |              |  |  |                                                                           |
| A  |     |       |         |          |            |              |  |  |                                                                           |
| S  | Ba  |       |         |          |            |              |  |  | TACGTAGGTGGCGAGCGTTATCCGGATTTATTGGGCGTAAAGCGTGCGCAGGCGGTTTGTTAAGTCTAAAATT |
| V  | ct  | Firm  |         |          |            |              |  |  | AAAGTCCGAAGCTTAACTTCGGTTCGTTTTAGAACTGGCAGGCTTGAGTATGGTAGAGGCAAACGGAATTT   |
| 34 | eri | icute |         |          | RF39_Fam   | RF39_Famil   |  |  | CTAGTGTAGCGGTAAAAATGCGTAGATATTAGAAGGAACACCAGTGGCGAAGGCGGTTTGCTGGGCCATTACT |
| 1  | a   | s     | Bacilli | RF39     | ily        | y_Genus      |  |  | GACGCTCATGCACGAAAGCGTGGGGAGCAAATAGG                                       |
| A  |     |       |         |          |            |              |  |  |                                                                           |
| S  | Ba  |       |         |          |            |              |  |  | TACGTAGGTGGCGAGCGTTATCCGGATTTATTGGGCGTAAAGCGTGCGCAGGCGGTTTGTTAGGTCTAAAATT |
| V  | ct  | Firm  |         |          |            |              |  |  | AAAGCCCGAAGCTTAACTTCGGTTCGTTTTAGAAACCGGCAGGCTTGAGTATGGTAGAGGCAAACGGAATTT  |
| 48 | eri | icute |         |          | RF39_Fam   | RF39_Famil   |  |  | CTAGTGTAGCGGTAAAAATGCGTAGATATTAGAAGGAACACCAGTGGCGAAGGCGGTTTGCTGGGCCATTACT |
| 9  | a   | s     | Bacilli | RF39     | ily        | y_Genus      |  |  | GACGCTCATGCACGAAAGCGTGGGGAGCAAATAGG                                       |
| A  |     |       |         |          |            |              |  |  |                                                                           |
| S  | Ba  |       |         |          |            |              |  |  | TACGTAGGTGGCGAGCGTTATCCGGATTTATTGGGCGTAAAGCGTGCGCAGGCGGTTTGTTAGGTCTAAAATT |
| V  | ct  | Firm  |         |          |            |              |  |  | AAAGTCCGAAGCTTAACTTCGGTTCGTTTTAGAAACCGGCAGGCTTGAGTATGGTAGAGGCAAACGGAATTT  |
| 21 | eri | icute |         |          | RF39_Fam   | RF39_Famil   |  |  | CTAGTGTAGCGGTAAAAATGCGTAGATATTAGAAGGAACACCAGTGGCGAAGGCGGTTTGCTGGGCCATTACT |
| 4  | a   | s     | Bacilli | RF39     | ily        | y_Genus      |  |  | GACGCTCATGCACGAAAGCGTGGGGAGCAAATAGG                                       |
| A  |     |       |         |          |            |              |  |  |                                                                           |
| S  | Ba  |       |         |          |            |              |  |  | TACGTAGGGGGCGAGCGTTATCCGGATTTATTGGGCGTAAAGGGTGTGTAGGCGGTTTGTTAAGTCTAAAAT  |
| V  | ct  | Firm  |         |          |            |              |  |  | CAAAGCCCGAGGCTTAACTTCGGTTCGTTTTAGAACTGGCAAACCTAGAGTACAGTAGAGGCAAAGTGAAT   |
| 39 | eri | icute |         |          | RF39_Fam   | RF39_Famil   |  |  | TTCTAGTGTAGCGGTTAAATGCGTAGATATTAGAAGGAACACCAGTGGCGAAGGCGGCTTGCTGGGCTGTTA  |
| 7  | a   | s     | Bacilli | RF39     | ily        | y_Genus      |  |  | CTGACGCTGAGACACGAAAGCGTGGGGAGCAAATAGG                                     |
| A  |     |       |         |          |            |              |  |  |                                                                           |
| S  | Ba  |       |         |          |            |              |  |  | TACGTAGGGGGCGAGCGTTATCCGGATTTATTGGGCGTAAAGCGTGTGTAGGCGGTTTATTAAGTCTAAGATT |
| V  | ct  | Firm  |         |          |            |              |  |  | AAAGCCTGGAGCTTAACTTCAGTTCGTCTTAGAACTGGTAGACTTGAGTGTGGTAGAGGCAAAGTGAATTT   |
| 26 | eri | icute |         |          | RF39_Fam   | RF39_Famil   |  |  | CTAGTGTAGCGGTAAATGCGTAGATATTAGAAGGAACACCAGTGGCGAAGGCGACTTGCTGGGCCATTACT   |
| 6  | a   | s     | Bacilli | RF39     | ily        | y_Genus      |  |  | GACGCTGAGACACGAAAGCGTGGGGAGCAAATAGG                                       |
| A  |     |       |         |          |            |              |  |  |                                                                           |
| S  | Ba  |       |         |          |            |              |  |  | TACGTAGGGGGCGAGCGTTATCCGGATTTATTGGGCGTAAAGCGTGTGTAGGCGGTTTATTAAGTATAAGATT |
| V  | ct  | Firm  |         |          |            |              |  |  | AAAGCCCGAGGCTTAACTTCGGTTCGTCTTATAAACTGGTAGACTTGAGTGTGGTAGAGGCAAAGTGAATTT  |
| 37 | eri | icute |         |          | RF39_Fam   | RF39_Famil   |  |  | CTAGTGTAGCGGTTAAATGCGTAGATATTAGAAGGAACACCAGTGGCGAAGGCGGCTTGCTGGGCCATTACT  |
| 1  | a   | s     | Bacilli | RF39     | ily        | y_Genus      |  |  | GACGCTGAGACACGAAAGCGTGGGGAGCAAATAGG                                       |
| A  |     |       |         |          |            |              |  |  |                                                                           |
| S  | Ba  |       |         |          |            |              |  |  | TACGGAGGGGGCGAGCGTTATCCGGATTTATTGGGCGTAAAGCGTGTGTAGGCGGTTTATTAAGTATAAGAT  |
| V  | ct  | Firm  |         |          |            |              |  |  | TAAAGCCCGAGGCTTAACTTCGGTTCGTCTTATAAACTGGTAGACTTGAGTGTGGTAGAGGCAAAGTGAATTT |
| 50 | eri | icute |         |          | RF39_Fam   | RF39_Famil   |  |  | TCTAGTGTAGCGGTTAAATGCGTAGATATTAGAAGGAACACCAGTGGCGAAGGCGGCTTGCTGGGCCATTAC  |
| 8  | a   | s     | Bacilli | RF39     | ily        | y_Genus      |  |  | TGACGCTGAGACACGAAAGCGTGGGGAGCAAATAGG                                      |
| A  |     |       |         |          |            |              |  |  |                                                                           |
| S  | Ba  |       |         |          |            |              |  |  | TACGTAGGTGGCGAGCGTTATCCGGAATTATTGGGCGTAAAGAGTGCGCAGGCGGTTTGATAAGTCTAAAAT  |
| V  | ct  | Firm  |         |          | Bacilli_Or | Bacilli_Orde |  |  | AAAAGCCCGAAGCTTAACTTCGGTTCGTTTTAGAACTGTCAGACTAGAGTGTGGTAGAGGCAAATGGAATTT  |
| 60 | eri | icute |         |          | der_Famil  | r_Family_Ge  |  |  | TCTAGTGCAGCGTAAAAATGCGTAGATATCGCGCAGAACTCCGATTGCGAAGGCAGCATGCCGGCTCCACA   |
| 4  | a   | s     | Bacilli | Order    | y          | nus          |  |  | CTGACGCTGAGGCACGAAAGCGTGGGTATCGAACAGG                                     |
| A  | Ba  | Bact  | Bacter  | Bacteria | Bacteria_P | Bacteria_Ph  |  |  | TACGTAGGTGGCGAGCGTTATCCGGATTTATTGGGCGTAAAGCGTGCGCAGGCGGCTTATTAAGTCTAAGAT  |
| S  | ct  | eria_ | ia_Ph   | _Phylu   | hylum_Cl   | ylum_Class_  |  |  | TAAAGCCCGAGCTTAACTCCGGTTCGTCTTAGAACTGGTAGGCTTGAGTATGGTAGAGGCAAACGGAATT    |

|       |          |                |                |                  |                      |                            |                                                                                                                                                                                                                                                                              |
|-------|----------|----------------|----------------|------------------|----------------------|----------------------------|------------------------------------------------------------------------------------------------------------------------------------------------------------------------------------------------------------------------------------------------------------------------------|
| V583A | eri a    | Phylum         | ylum_Class     | m_Class_Order    | ass_Order_Family     | Order_Family_Genus         | CCTAGTGTAGCGGTGAAATGCATAGATATCGCGCAGAACTCCGATTGCGAAGGCAGCATGCCGGCTCCACA<br>CTGACGCTGAGGCACGAAAGCGTGGGTATCGAACAGG                                                                                                                                                             |
| V037A | Bacteria | Firmicutes     | Bacilli        | RF39             | RF39_Family          | RF39_Family_Genus          | TACGTAGGTGGCGAGCGTTATCCGGATTTATTGGGCGTAAAGCGTCCGCAGCCGGTTTATTAAGTATAGAAT<br>AAAACCTTCGGGGCTCAACCCGCTCTCGTTCTATAAACTGATAGACTAGAGTGTGGTAGAGGCAAATGGAATT<br>TCTAGTGTAGCGGTAGAATGCGTAGATATTAGAAGGAACACCAGTGGCGAAGGCCGACTTGCTGGGCCATCA<br>CTGACGGTCAGGGACGAAAGCGTGGGGAGCGAATAGG   |
| V599A | Bacteria | Firmicutes     | Bacilli        | Bacilli_Order    | Bacilli_Order_Family | Bacilli_Order_Family_Genus | TACGTAGGTGGCGAGCGTTATCCGGAATTATTGGGCGTAAAGAGTGCGCAGGCGGTTTGATAAGTCTAAAAAT<br>AAAAGCCCGAAGCTTAACCTTCGGTTCGTTTTAGAACTGTCAGACTAGAGTGTGGTAGAGGCAAATGGAATT<br>TCTAGTGTAGCGGTAAAAATGCGTAGATATTAGGAGGAACACCAGATTGCGAAGGCAGCCTGCTGGACTGTAA<br>CTGACGCTGATGCTCGAAAAGTGTGGGTATCAAACAGG |
| V262A | Bacteria | Firmicutes     | Bacilli        | RF39             | RF39_Family          | RF39_Family_Genus          | TACGTAGGTGGCGAGCGTTATCCGGAATTATTGGGCGTAAAGAGTGCGCAGGCGGTTTGATAAGTCTAAAAAT<br>AAAAGCCCGAAGCTTAACCTTCGGTTCGTTTTAGAACTGTCAGACTAGAGTGTGGTAGAGGCAAATGGAATT<br>TCTAGTGTAGCGGTAAAAATGCGTAGATATTAGAAGGAACACCAGTGGCGAAGGCCGATTTGCTGGGCCACAA<br>CTGACGCTCATGCACGAAAGCGTGGGGAGCAAATAGG  |
| V553A | Bacteria | Firmicutes     | Bacilli        | RF39             | RF39_Family          | RF39_Family_Genus          | TACGTAGGTGGCGAGCGTTATCCGGATTTATTGGGCGTAAAGCGTGCGCAGGCGGCTTATTAAGTCTAAGAT<br>TAAAGCCCGGAGCTTAACCTCCGGTTCGTCTTAGAACTGGTAGGCTTGAGTATGGTAGAGGCAAACGGAATT<br>CCTAGTGTAGCGGTGGAATGCGTAGATATTAGGAGGAACACCAGTGGCGAAGGCCGGCTTACTGGACCGTAA<br>CTGACGTTGAGGCTCGAAAAGCGTGGGGAGCAAACAGG   |
| V238A | Bacteria | Actinobacteria | Coriobacteriia | Coriobacteriales | Eggerthellaceae      | Enterorhabdus              | TACGTAGGGGGCGAGCGTTATCCGGATTCATTGGGCGTAAAGCGCGCGTAGGCGGCCGCTAAGCGGAACC<br>TCTAACCCCGGGGCTCAACCTCGGGCCGGGTTCCGGACTGGGCGGCTCGAGTGCGGTAGAGGAGAGCGGAA<br>TTCCCGGTGTAGCGGTGGAATGCGCAGATATCGGGAAGAACACCGATGGCGAAGGCAGCTCTCTGGGCCGT<br>CACTGACGCTGAGGCGCGAAAGCTGGGGGAGCGAACAGG      |
| V336A | Bacteria | Actinobacteria | Coriobacteriia | Coriobacteriales | Eggerthellaceae      | Enterorhabdus              | TACGTAGGGAGCGAGCGTTATCCGGATTCATTGGGCGTAAAGCGCGCGTAGGCGGCTGCCTAAGCGGAACC<br>TCTAACCCCGGGGCTCAACCTCGGGCCGGGTTCCGAACTGGGCGGCTCGAGTGCGGTAGAGGAGAGCGGAA<br>TTCCCGGTGTAGCGGTGGAATGCGCAGATATCGGGAAGAACACCGATGGCGAAGGCAGCTCTCTGGGCCGG<br>CACTGACGCTGAGGCGCGAAAGCTGGGGGAGCGAACAGG     |
| V253A | Bacteria | Actinobacteria | Coriobacteriia | Coriobacteriales | Eggerthellaceae      | Parvibacter                | TACGTAGGGAGCGAGCGTTATCCGGATTCATTGGGCGTAAAGCGCGCGTAGGCGGCTGCCTAAGCGGAACC<br>TCTAATCCCGGGGCTCAACCTCGGGCCGGGTTCCGAACTGGGCGGCTCGAGTGCGGTAGAGGCAGGCGGAA<br>TTCCCGGTGTAGCGGTGGAATGCGCAGATATCGGGAAGAACACCGATGGCGAAGGCAGCCTGCTGGGCCGT<br>CACTGACGCTGAGGCGCGAAAGCTGGGGGAGCGAACAGG     |
| V193A | Bacteria | Actinobacteria | Coriobacteriia | Coriobacteriales | Eggerthellaceae      | Adlercreutzia              | TACGTAGGGGGCGAGCGTTATCCGGATTCATTGGGCGTAAAGCGCGCGTAGGCGGCCGCTAAGCGGAACC<br>TCTAATCCCGGGGCTCAACCTCGGGCCGGGTTCCGAACTGGGCGGCTCGAGTGCGGTAGAGGCAGGCGGAA<br>TTCCCGGTGTAGCGGTGGAATGCGCAGATATCGGGAAGAACACCGATGGCGAAGGCAGCCTGCTGGGCCGG<br>CACTGACGCTGAGGCGCGAAAGCTGGGGGAGCGAACAGG      |

|         |          |                |                  |                  |                 |                       |                                                                                                                                                                                                                                                                            |
|---------|----------|----------------|------------------|------------------|-----------------|-----------------------|----------------------------------------------------------------------------------------------------------------------------------------------------------------------------------------------------------------------------------------------------------------------------|
| ASV187A | Bacteria | Actinobacteria | Coriobacteriales | Coriobacteriales | Eggerthellaceae | DNF00809              | TACGTAGGGGGCAAGCGTTATCCGGATTCAATTGGGCGTAAAGCGCGCGCAGGCGGGCCGCTAAGCGGGACC<br>TCTAATCTTGGGGCTCAACCTCAAGCCGGGTCCCGAAGTGGCAGCCTCGAGTGCGGTAGGGGTAAAGCGGAAT<br>TCCCGGTGTAGCGGTGGAATGCGCAGATATCGGGAAGAACACCGATGGCGAAGGCAGCTTACTGGGCCGAC<br>ACTGACGCTGAGGCGCGAAAGCTAGGGGAGCGAACAGG |
| ASV332A | Bacteria | Actinobacteria | Coriobacteriales | Coriobacteriales | Eggerthellaceae | DNF00809              | TACGTAGGGGGCGAGCGTTATCCGGATTCAATTGGGCGTAAAGCGCGCGCAGGCGGACCGTTAAGCGGGACC<br>TCTAATCTTGGGGCTCAACCTCAGGCCGGGTCCCGAAGTGGCGGTCTCGAGTGCGGTAGGGGAGGTCGGAAT<br>TCCCGGTGTAGCGGTGGAATGCGCAGATATCGGGAAGAACACCGATGGCGAAGGCAGACCTCTGGGCCGAC<br>ACTGACGCTGAGGCGCGAAAGCTAGGGGAGCGAACAGG  |
| ASV292A | Bacteria | Actinobacteria | Coriobacteriales | Coriobacteriales | Eggerthellaceae | Enterorhabdus         | TACGTAGGGGGCGAGCGTTATCCGGATTCAATTGGGCGTAAAGCGCGCGCAGGCGGGCTTGAAGCGGGGCC<br>TTAATCTTGGGGCTTAACCTCAAGTCGGGTTCGGAAGTCAAGCCTCGAGTGTGGTAGGGGAAGGCGGAAT<br>TCCCGGTGTAGCGGTGGAATGCGCAGATATCGGGAAGAACACCGATGGCGAAGGCAGCCTTCTGGGCCACT<br>ACTGACGCTGAGGCGCGAAAGCTGGGGGAGCGAACAGG     |
| ASV153A | Bacteria | Actinobacteria | Coriobacteriales | Coriobacteriales | Eggerthellaceae | Eggerthellaceae_Genus | TACGTATGGGGCAAGCGTTATCCGGATTCAATTGGGCGTAAAGCGCGCGCAGGCGGGCGCCTAAGCGGGACC<br>TCTAATCTCGGGGCTCAACCCCGAGCCGGGTTCGGAAGTGGGCACCTCGGGTTCGGTAGGGGTAGACGGAAT<br>TCCCGGTGTAGCGGTGGAATGCGCAGATATCGGGAAGAACACCGATGGCGAAGGCAGTCTACTGGGCCGCA<br>ACCGACGCTGAGGCGCGAAAGCTGGGGGAGCGAACAGG  |
| ASV223A | Bacteria | Actinobacteria | Coriobacteriales | Coriobacteriales | Eggerthellaceae | DNF00809              | TACGTAGGGGAGCGAGCGTTATCCGGATTCAATTGGGCGTAAAGCGCGCGTAGGCGGGCATCTAAGCGGGACC<br>TCTAATCTCGGGGCTCAACCTCGAGCCGGGTTCGGAAGTGGATGCCTCGAGTCCGGTAGGGGCAAGTGAAT<br>TCCCGGTGTAGCGGTGGAATGCGCAGATATCGGGAAGAACACCGATGGCGAAGGCAGCTTGCTGGGCCGCG<br>ACTGACGCTGAGGCGCGAAAGCTAGGGGAGCGAACAGG  |
| ASV564A | Bacteria | Actinobacteria | Coriobacteriales | Coriobacteriales | Eggerthellaceae | Eggerthellaceae_Genus | TACGTAGGTGGCAAGCGTTGTCCGGATTTATTGGGCGTAAAGCGCGCGTAGGCGGCGCGTCAAGCGGGACCT<br>CTAACCCCGGGGCTCAACCCCGGGCCGGGTCCCGGACTGGCGCGCTCGAGTGCGGTAGAGGCGAGTGAAT<br>TCCCGGTGTAGCGGTGGAATGCGTAGATATATGGAAGAACACCAGTGGCGAAGGCGGCTCTCTGGTCTGCA<br>ACTGACGCTGAGGCTCGAAAGCATGGGTAGCGAACAGG    |
| ASV400A | Bacteria | Actinobacteria | Coriobacteriales | Coriobacteriales | Eggerthellaceae | DNF00809              | TACGTAGGGGGCGAGCGTTATCCGGATTCAATTGGGCGTAAAGCGCGCGTAGGCGGCGCGTCAAGCGGGACC<br>TCTAACCCCGGGGCTCAACCCCGGGCCGGGTCCCGGACTGGCGCGCTCGAGTGCGGTAGAGGCGAGTGGAA<br>TTCCCGGTGTAGCGGTGGAATGCGCAGATATCGGGAAGAACACCGATGGCGAAGGCAGCTCGCTGGGCCGA<br>CACTGACGCTGAGGCGCGAAAGCTGGGGGAGCGAACAGG  |
| ASV113A | Bacteria | Actinobacteria | Coriobacteriales | Coriobacteriales | Eggerthellaceae | Enterorhabdus         | TACGTAGGGGGCGAGCGTTATCCGGATTCAATTGGGCGTAAAGCGCGCGTAGGCGGCGCGTCAAGCGGGACC<br>TCTAACCCCGGGGCTCAACCCCGGGCCGGGTCCCGGACTGGCGCGCTCGAGTGCGGTAGAGGAGAGCGGAA<br>TTCCCGGTGTAGCGGTGGAATGCGCAGATATCGGGAAGAACACCGATGGCGAAGGCAGCTCTCTGGGCCGT<br>CACTGACGCTGAGGCGCGAAAGCTGGGGGAGCGAACAGG  |
| ASV113A | Bacteria | Actinobacteria | Coriobacteriales | Coriobacteriales | Eggerthellaceae | Enterorhabdus         | TACGTAGGGGGCGAGCGTTATCCGGATTCAATTGGGCGTAAAGCGCGCGTAGGCGGCGCGTCAAGCGGGACC<br>TCTAACCCCGGGGCTCAACCCCGGGCCGGGTCCCGGACTGGCGCGCTCGAGTGCGGTTAGAGGAGAGCGGAA<br>TTCCCGGTGTAGCGGTGGAATGCGCAGATATGGAAGTACCAACAGTGGCGAAGGCAGCTTACTGGACTGT<br>AACTGACGTTGAGGCTCGAAAGCGTGGGGAGCAAACAGG  |

|    |     |       |        |          |           |             |  |                                                                           |
|----|-----|-------|--------|----------|-----------|-------------|--|---------------------------------------------------------------------------|
| 48 |     |       |        |          |           |             |  |                                                                           |
| 0  |     |       |        |          |           |             |  |                                                                           |
| A  |     |       | Gam    |          |           |             |  |                                                                           |
| S  | Ba  | Prot  | mapr   |          |           | Comamona    |  | TACGTAGGGTGCAAGCGTTAATCGGAATTACTGGGCGTAAAGCGTGCGCAGGCGGTTATGTAAGACAGAGG   |
| V  | ct  | eoba  | oteob  |          |           | daceae_Gen  |  | TGAAATCCCCGGGCTCAACCTGGGAAGTGCCTTTGTGACTGCATGACTAGAGTACGGTAGAGGGGGATGGA   |
| 60 | eri | cteri | acteri | Burkhol  | Comamon   |             |  | ATTCCACGTGTAGCAGTGAAATGCGTAGATATGTGGAGGAACACCGATGGCGAAGGCAATCCCCTGGACCT   |
| 3  | a   | a     | a      | deriales | adaceae   | us          |  | GTACTGACGCTCATGCACGAAAGCGTGGGGAGCAAACAGG                                  |
| A  |     |       |        |          |           |             |  |                                                                           |
| S  | Ba  |       |        |          |           |             |  | TACGTAGGATCCGAGCATTATCCGGAGTGACTGGGTGTAAAGAGTTGCGTAGGTGGCATAATAAGTAGCTAG  |
| V  | ct  | Pates | Sacch  | Sacchari |           | Candidatus_ |  | TGAAATCTGGTGGCTCAACCTCAGACTATTAGCTAAACTGTAAAGCTCGAGACCGTTAGGGGTAAGTGA     |
| 42 | eri | cibac | arimo  | monada   | Saccharim | Saccharimon |  | ATTTCTAGTGTAGGAGTGAAATCCGTAGATATTAGAAAGAACACCAATAGCGTAGGCAGGTTACTGGGACG   |
| 8  | a   | teria | nadia  | les      | onadaceae | as          |  | GTTCTGACACTAAGGCACGAAAGCGTAGGGAGCAAACGGG                                  |
| A  |     |       |        |          |           |             |  |                                                                           |
| S  | Ba  |       |        |          |           |             |  | TACGTAGGACCCGAGCATTATCCGGAGTGACTGGGTGTAAAGAGTTGCGTAGGTGGCATAATAAGTAGCTAG  |
| V  | ct  | Pates | Sacch  | Sacchari |           | Candidatus_ |  | TGAAATCTGGTGGCTCAACTATTCAGACTATTAGCTAAACTGTAAAGCTCGAGACCGTTAGGGGTAAGTGA   |
| 48 | eri | cibac | arimo  | monada   | Saccharim | Saccharimon |  | ATTTCTAGTGTAGGAGTGAAATCCGTAGATATTAGAAAGAACACCAATAGCGTAGGCAGGTTACTGGGACG   |
| 6  | a   | teria | nadia  | les      | onadaceae | as          |  | GTTCTGACACTAAGGCACGAAAGCGTAGGGAGCAAACGGG                                  |
| A  |     | Verr  |        |          |           |             |  |                                                                           |
| S  | Ba  | uco   |        |          |           |             |  | TACGGAGGGTGCTAGCGTTAATCCGATTTATTGGGCGTAAAGGGCGTGAGGCGGAAAGGTAAGTTAGTTGT   |
| V  | ct  | micr  | Chla   |          |           |             |  | CAAATCTCGGGGCTCAACCCGAATCGGCATCTAAACTATTTTCTAGAGGGTAGATGGAGAAAAGGGAA      |
| 21 | eri | obiot | mydia  | Chlamy   | Chlamydi  |             |  | TTTCACGTGTAGCGGTGAAATGCGTAGATATGTGGAAGAACACCAAGTGGCGAAGGCGCTTTTCTAATTTATA |
| 3  | a   | a     | e      | diales   | aceae     | Chlamydia   |  | CCTGACGCTAAGGCGCGAAAGCAAGGGGAGCAAACAGG                                    |
| A  |     | Verr  |        |          |           |             |  |                                                                           |
| S  | Ba  | uco   |        |          |           |             |  | TACAGAGGTCTCAAGCGTTGTTCCGAATCACTGGGCGTAAAGCGTGCGTAGGCTGTTTCGTAAGTCGTGTGTG |
| V  | ct  | micr  | Verru  | Verruco  |           |             |  | AAAGGCGCGGGCTCAACCCGCGGACGGCACATGATACTGCGAGACTAGAGTAATGGAGGGGGAAACCGGAA   |
| 56 | eri | obiot | comic  | microbi  | Akkerman  | Akkermansi  |  | TTCTCGGTGTAGCAGTGAAATGCGTAGATATCGAGAGGAACACTCGTGCGAAGGCGGGTTCTTGACATTA    |
| 7  | a   | a     | robiae | ales     | siaceae   | a           |  | ACTGACGCTGAGGCACGAAGGCCAGGGGAGCGAAAGGG                                    |
| A  |     |       |        |          |           |             |  |                                                                           |
| S  | Ba  |       |        |          |           |             |  | TACGTAGGGGGCAAGCGTTATCCGGATTTACTGGGTGTAAAGGGAGCGTAGACGGCTTGGAAGCCAGATG    |
| V  | ct  | Firm  |        |          |           |             |  | TGAAAGGCTGGGGCTCAACCCAGGACTGCATTTGAAACTGTTTTCTTGAGTACCGGAGAGGTCATCGGAA    |
| 54 | eri | icute | Clostr | Lachnos  | Lachnospi | Lachnospira |  | TTCTTGTTGTAGCGGTGAAATGCGTAGATATAAGGAAGAACACCAAGTGGCGAAGGCGGCTTCTGGTCTGCA  |
| 2  | a   | s     | idia   | pirales  | raceae    | ceae_Genus  |  | ACTGACACTGAGGCGCGAAAGCGTGGGGAGCAAACAGG                                    |
| A  |     |       |        |          |           |             |  |                                                                           |
| S  | Ba  |       |        |          |           |             |  | TACGTATGGGGCAAGCGTTATCCGGATTTACTGGGTGTAAAGGGAGCGTAGGCGGCCATGCAAGTCAGAAG   |
| V  | ct  | Firm  |        |          |           |             |  | TGAAAACCCGGGGCTCAACCTGGGAGTGCTTTTGAAACTGTGCGGCTAGAGTGTGCGAGGGGTAAGTGA     |
| 42 | eri | icute | Clostr | Lachnos  | Lachnospi | Lachnospira |  | ATTCCATGTGTAGCGGTGAAATGCGTAGAGATATGGAGGAACACCAAGTGGCGAAGGCGGCTTCTGGTCTGC  |
| 9  | a   | s     | idia   | pirales  | raceae    | ceae_Genus  |  | AACTGACACTGAGGCGCGAAAGCGTGGGGAGCAAACAGG                                   |
| A  |     |       |        |          |           |             |  |                                                                           |
| S  | Ba  |       |        |          |           |             |  | TACGTAGGGGGCAAGCGTTATCCGGATTTACTGGGTGTAAAGGGAGCGTAGGCGGCCATGCAAGTCAGAAG   |
| V  | ct  | Firm  |        |          |           |             |  | TGAAAACCCGGGGCTCAACCTGGGAGTGCTTTTGAAACTGTGCGGCTAGAGTGTGCGAGGGGTAAGTGA     |
| 05 | eri | icute | Clostr | Lachnos  | Lachnospi | Lachnospira |  | ATTCCTAGTGTAGCGGTGAAATGCGTAGATATTAGGAGGAACACCAAGTGGCGAAGGCGGCTTACTGGACGA  |
| 2  | a   | s     | idia   | pirales  | raceae    | ceae_Genus  |  | TGACTGACGCTGAGGCTCGAAAGCGTGGGGAGCAAACAGG                                  |

|    |     |       |        |         |           |             |  |                                                                          |
|----|-----|-------|--------|---------|-----------|-------------|--|--------------------------------------------------------------------------|
| A  | S   | Ba    |        |         |           |             |  | TACGTAGGGGGCAAGCGTTATCCGGATTTACTGGGTGTAAAGGGAGCGTAGGCCGCCACGCAAGTCAGAAG  |
|    | V   | ct    | Firm   |         |           |             |  | TGAAAACCCGGGGCTCAACCCTGGGAGTGCTTTTGAAACTGTGCGGCTAGAGTGTCCGAGGGGTAAGTGGA  |
| 06 | eri | icute | Clostr | Lachnos | Lachnospi | Lachnospira |  | ATTCCTAGTGTAGCGGTGAAATGCGTAGATATTAGGAGGAACACCAGTGGCGAAGGCGGCTTACTGGACGA  |
| 8  | a   | s     | idia   | pirales | raceae    | ceae_Genus  |  | TGACTGACGCTGAGGCTCGAAAGCGTGGGGAGCAAACAGG                                 |
| A  | S   | Ba    |        |         |           |             |  | TACGTAGGGGGCAAGCGTTATCCGGATTTACTGGGTGTAAAGGGAGCGTAGGCCGCCAGTGCAAGTCAGAAG |
|    | V   | ct    | Firm   |         |           |             |  | TGAAAGCCCAAGGCTCAACCATGGGACTGCTTTTGAAACTGTACAGCTAGATTGCAGGAGAGGTAAGTGGA  |
| 11 | eri | icute | Clostr | Lachnos | Lachnospi | GCA-        |  | ATTCCTAGTGTAGCGGTGAAATGCGTAGATATTAGGAGGAACACCAGTGGCGAAGGCGGCTTACTGGACTGT |
| 7  | a   | s     | idia   | pirales | raceae    | 900066575   |  | AAATGACGCTGAGGCTCGAAAGCGTGGGGAGCAAACAGG                                  |
| A  | S   | Ba    |        |         |           |             |  | TACGTAGGGGGCAAGCGTTATCCGGATTTACTGGGTGTAAAGGGAGCGTAGGCCGCCAAGGTAAGCCAGAAG |
|    | V   | ct    | Firm   |         |           |             |  | TGAAAGCCCGCGGCTCAACTGCGGGACTGCTTTTGAAACTATCTAGCTAGATTGCAGGAGAGGTAAGTGGA  |
| 31 | eri | icute | Clostr | Lachnos | Lachnospi | Lachnospira |  | TTCTAGTGTAGCGGTGAAATGCGTAGATATTAGGAGGAACACCAGTGGCGAAGGCGGCTTACTGGACTGA   |
| 4  | a   | s     | idia   | pirales | raceae    | ceae_Genus  |  | AATGACGCTGAGGCTCGAAAGCGTGGGGAGCAAACAGG                                   |
| A  | S   | Ba    |        |         |           |             |  | TACGTAGGGGGCAAGCGTTATCCGGATTTACTGGGTGTAAAGGGAGCGTAGGCCGCCATGGTAAGCCAGATG |
|    | V   | ct    | Firm   |         |           |             |  | TGAAAGCCCGCGGCTTAACCGCGCGGATTGCATTTGGAACATCAAGCTAGAGTACAGGAGAGGAAAGCGG   |
| 41 | eri | icute | Clostr | Lachnos | Lachnospi | Lachnospira |  | AATTCCTAGTGTAGCGGTGAAATGCGTAGATATTAGGAAGAACACCAGTGGCGAAGGCGGCTTTCTGGACTG |
| 5  | a   | s     | idia   | pirales | raceae    | ceae_UCG-   |  | AAACTGACGCTGAGGCTCGAAAGCGTGGGGAGCAAACAGG                                 |
| A  | S   | Ba    |        |         |           |             |  | TACGTAGGGGGCAAGCGTTATCCGGAATTACTGGGTGTAAAGGGAGCGTAGGCCGCCATGGTAAGCCAGATG |
|    | V   | ct    | Firm   |         |           |             |  | TGAAAGCCCGCGGCTTAACCGCGCGGATTGCATTTGGAACATCAAGCTAGAGTACAGGAGAGGAAAGCGG   |
| 27 | eri | icute | Clostr | Lachnos | Lachnospi | Lachnospira |  | AATTCCTAGTGTAGCGGTGAAATGCGTAGATATTAGGAAGAACACCAGTGGCGAAGGCGGCTTTCTGGACTG |
| 7  | a   | s     | idia   | pirales | raceae    | ceae_UCG-   |  | AAACTGACGCTGAGGCTCGAAAGCGTGGGGAGCAAACAGG                                 |
| A  | S   | Ba    |        |         |           |             |  | TACGTAGGGGGCAAGCGTTATCCGGAATTACTGGGTGTAAAGGGAGCGTAGGCCGCCATGGTAAGCCAGATG |
|    | V   | ct    | Firm   |         |           |             |  | TGAAAGCCCGCGGCTTAACCGCGCGGATTGCATTTGGAACATCAAGCTAGAGTACAGGAGAGGAAAGCGG   |
| 51 | eri | icute | Clostr | Lachnos | Lachnospi | Lachnospira |  | AATTCCTAGTGTAGCGGTGAAATGCGTAGATATCAGGAGGAACACCGCGGCGAAGGCGGCCTGCTGGACT   |
| 1  | a   | s     | idia   | pirales | raceae    | ceae_UCG-   |  | GAAACTGACGTTGAGGCTCGAAAGCGTGGGGAGCAAACAGG                                |
| A  | S   | Ba    |        |         |           |             |  | TACGTAGGGGGCAAGCGTTATCCGGAATTACTGGGTGTAAAGGGTGAGTAGGCCGCCATGGTAAGCCAGATG |
|    | V   | ct    | Firm   |         |           |             |  | TGAAAGCCTTGGGCTTAACCCGAGGATTGCATTTGGAACATCAAGCTAGAGTACAGGAGAGGAAAGCGGA   |
| 27 | eri | icute | Clostr | Lachnos | Lachnospi | Tuzzerella  |  | ATTCCTAGTGTAGCGGTGAAATGCGTAGATATTAGGAAGAACACCAGTGGCGAAGGCGGCTTTCTGGACTGA |
| 2  | a   | s     | idia   | pirales | raceae    |             |  | AACTGACGCTGAGGCACGAAAGCGTGGGGAGCGAACAGG                                  |
| A  | S   | Ba    |        |         |           |             |  | TACGTAGGGGGCAAGCGTTATCCGGAATTACTGGGTGTAAAGGGAGAGTAGGCCGCCAAGGTAAGCGATATG |
|    | V   | ct    | Firm   |         |           |             |  | TGAAAGCCTTAGGCTTAACCAAAGGATTGCATAACGAACATCTAGCTAGAGTACAGGAGAGGAAAGCGGA   |
| 08 | eri | icute | Clostr | Lachnos | Lachnospi | ASF356      |  | ATTCCTAGTGTAGCGGTGAAATGCGTAGATATTAGGAAGAACACCAGTGGCGAAGGCGGCTTTCTGGACTGA |
| 7  | a   | s     | idia   | pirales | raceae    |             |  | AACTGACGCTGAGGCTCGAAAGCGTGGGGAGCGAACAGG                                  |
| A  | Ba  |       |        |         |           |             |  | TACGTAGGGGGCAAGCGTTATCCGGAATTACTGGGTGTAAAGGGAGAGTAGGCCGCCAAGGTAAGCGATATG |
|    | ct  | Firm  |        |         |           |             |  | TGAAAGCCTTAAGCTTAACCTAAGGATGGCATAACGAACATCTAGCTAGAGTACAGGAGAGGAAAGCGGA   |
| S  | eri | icute | Clostr | Lachnos | Lachnospi | ASF356      |  | ATTCCTAGTGTAGCGGTGAAATGCGTAGATATTAGGAAGAACACCAGTGGCGAAGGCGGCTTTCTGGACTGA |
| V  | a   | s     | idia   | pirales | raceae    |             |  | AACTGACGCTGAGGCTCGAAAGCGTGGGGAGCGAACAGG                                  |

|    |     |       |        |         |           |             |                                                                          |
|----|-----|-------|--------|---------|-----------|-------------|--------------------------------------------------------------------------|
| 11 |     |       |        |         |           |             |                                                                          |
| 1  |     |       |        |         |           |             |                                                                          |
| A  |     |       |        |         |           |             |                                                                          |
| S  | Ba  | Firm  |        |         |           |             | TACGTAGGGGGCAAGCGTTATCCGGATTTACTGGGTGTAAAGGGAGCGTAGGTGGCATGGTAAGCCAGAAG  |
| V  | ct  |       |        |         |           |             | TGAAAACCCAGGGCTCAACTCTGTGGATTGCTTTTGAACTATCAAGCTAGAGTGCTGGAGGGGTAAGCGGA  |
| 12 | eri | icute | Clostr | Lachnos | Lachnospi | Lachnospira | ATTCTAGTGTAGCGGTGAAATGCGTAGATATTAGGAGGAACACCGGTGGCGAAGGCGGCTTACTGGACAG   |
| 9  | a   | s     | idia   | pirales | raceae    | ceae_Genus  | AAACTGACACTGAGGCTCGAAAGCGTGGGGAGCAAACAGG                                 |
| A  |     |       |        |         |           |             |                                                                          |
| S  | Ba  | Firm  |        |         |           |             | TACGTAGGGGGCAAGCGTTATCCGGATTTACTGGGTGTAAAGGGAGCGTAGGTGGCATGGTAAGCCAGAAG  |
| V  | ct  |       |        |         |           |             | TGAAAACCCAGGGCTCAACTCTGTGGATTGCTTTTGAACTATCAAGCTAGAGTGCCGGAGGGGCAAGCGG   |
| 53 | eri | icute | Clostr | Lachnos | Lachnospi | Lachnospira | AATTCCTAGTGTAGCGGTGAAATGCGTAGATATTAGGAGGAACACCAGTGGCGAAGGCGGTCTGCTGGACA  |
| 2  | a   | s     | idia   | pirales | raceae    | ceae_Genus  | GCAACTGACGGTGAGGCGCGAAAGCGTGGGGAGCAAACAGG                                |
| A  |     |       |        |         |           |             |                                                                          |
| S  | Ba  | Firm  |        |         |           | Lachnospira | TACGTAGGGGGCAAGCGTTATCCGGATTTACTGGGTGTAAAGGGAGCGTAGGTGGCATGGCAAGCCAGAAG  |
| V  | ct  |       |        |         |           | ceae_FCS020 | TGAAAACCCGGGGCTTAACCCCGCGGATTGCTTTTGAACTGTCAGGCTGGAGTGCAGGAGGGGCAGGCGG   |
| 14 | eri | icute | Clostr | Lachnos | Lachnospi | _group      | AATTCCTGGTGTAGCGGTGAAATGCGTAGATATCAGGAGGAACACCGGTGGCGAAGGCGGCCTGCTGGACT  |
| 9  | a   | s     | idia   | pirales | raceae    |             | GTAAGTACACTGAGGCTCGAAAGCGTGGGGAGCAAACAGG                                 |
| A  |     |       |        |         |           |             |                                                                          |
| S  | Ba  | Firm  |        |         |           | Lachnospira | TACGTAGGGGGCAAGCGTTATCCGGATTTACTGGGTGTAAAGGGAGCGTAGGTGGCAAGGCAAGCCAGAAG  |
| V  | ct  |       |        |         |           | ceae_FCS020 | TGAAACCCCGGGGCTTAACCCCGCGGATTGCTTTTGAACTGTCTGGCTGGAGTGCAGGAGGGGCAGGCGG   |
| 29 | eri | icute | Clostr | Lachnos | Lachnospi | _group      | AATTCCTGGTGTAGCGGTGAAATGCGTAGATATCAGGAGGAACACCAGTGGCGAAGGCGGCCTGCTGGACT  |
| 9  | a   | s     | idia   | pirales | raceae    |             | GTAAGTACACTGAGGCTCGAAAGCGTGGGGAGCAAACAGG                                 |
| A  |     |       |        |         |           |             |                                                                          |
| S  | Ba  | Firm  |        |         |           |             | TACGTAGGGGGCAAGCGTTATCCGGAATTACTGGGTGTAAAGGGTGCGTAGGTGGTATGGCAAGTCAGAAG  |
| V  | ct  |       |        |         |           |             | TGAAAACCCAGGGCTTAACCTCTGGGACTGCTTTTGAACTGTCAGACTGGAGTGCAGGAGAGGTAAGCGGA  |
| 38 | eri | icute | Clostr | Lachnos | Lachnospi | Anaerostipe | ATTCTAGTGTAGCGGTGAAATGCGTAGATATTAGGAGGAACATCAGTGGCGAAGGCGGCTTACTGGACTGA  |
| 8  | a   | s     | idia   | pirales | raceae    | s           | AACTGACACTGAGGCACGAAAGCGTGGGGAGCAAACAGG                                  |
| A  |     |       |        |         |           |             |                                                                          |
| S  | Ba  | Firm  |        |         |           |             | TACGTAGGGGGCAAGCGTTATCCGGATTTACTGGGTGTAAAGGGAGCGTAGGTGGCAGGGCAAGTCAGATG  |
| V  | ct  |       |        |         |           |             | TGAAAACCCGGGGCTCAACTCCGGGAGTGCAATTTGAACTGTCCAGCTAGAGTGCAGGAGAGGTAAGCGGA  |
| 04 | eri | icute | Clostr | Lachnos | Lachnospi | Lachnospira | ATTCTAGTGTAGCGGTGAAATGCATAGATATTAGGAGGAACACCAGTGGCGAAGGCGGCTTACTGGACTGT  |
| 3  | a   | s     | idia   | pirales | raceae    | ceae_Genus  | AACTGACACTGAGGCTCGAAAGCGTGGGGAGCAAACAGG                                  |
| A  |     |       |        |         |           |             |                                                                          |
| S  | Ba  | Firm  |        |         |           |             | TACGTAGGGGGCAAGCGTTATCCGGATTTACTGGGTGTAAAGGGTGCGTAGGTGGCAGGGCAAGTCAGATGT |
| V  | ct  |       |        |         |           |             | GAAAGCCCCGGGGCTCAACCCCGGTACTGCATTTGAACTGTCCAGCTGGAGTGCAGGAGAGGTAAGCGGAA  |
| 06 | eri | icute | Clostr | Lachnos | Lachnospi | Anaerostipe | TTCCTAGTGTAGCGGTGAAATGCGTAGATATTAGGAGGAACACCAGTGGCGAAGGCGGCTTACTGGACTGTA |
| 7  | a   | s     | idia   | pirales | raceae    | s           | ACTGACACTGAGGCACGAAAGCGTGGGGAGCAAACAGG                                   |
| A  |     |       |        |         |           |             |                                                                          |
| S  | Ba  | Firm  |        |         |           |             | TACGTAGGGGGCAAGCGTTATCCGGATTTACTGGGTGTAAAGGGAGCGTAGGTGGCGTGCCAAGTCAGGAG  |
| V  | ct  |       |        |         |           |             | TGAAAACCCAGGGCCCAACCCTGGGACTGCTCTTGAACTGGCAGGCTTGAGTGTCTGGAGAGGTAAGCGGA  |
| 16 | eri | icute | Clostr | Lachnos | Lachnospi | Lachnospira | ATTCTAGTGTAGCGGTGAAATGCGTAGATATTAGGAGGAACACCAGTGGCGAAGGCGGCTTACTGGACAG   |
| 5  | a   | s     | idia   | pirales | raceae    | ceae_Genus  | TGACTGACACTGAGGCTCGAAAGCGTGGGGAGCAAACAGG                                 |

|    |     |       |        |         |           |             |  |                                                                          |
|----|-----|-------|--------|---------|-----------|-------------|--|--------------------------------------------------------------------------|
| A  | S   | Ba    |        |         |           |             |  | TACGTAGGGGGCAAGCGTTATCCGGATTTACTGGGTGTAAAGGGAGCGTAGGTGGCAAGGCAAGTCAGAAG  |
|    | V   | ct    | Firm   |         |           |             |  | TGAAACCCTCGGGCTCAACCTGAGGCATGCTTTTGAAACTGTCAAGCTGGAGTGCTGGAGAGGTAAGCGGA  |
| 28 | eri | icute | Clostr | Lachnos | Lachnospi | Lachnospira |  | ATTCCTAGTGTAGCGGTGAAATGCGTAGATATTAGGAGGAACACCGGTGGCGAAGGCGGCTTACTGGACAG  |
| 4  | a   | s     | idia   | pirales | raceae    | ceae_Genus  |  | TAACTGACACTGAGGCTCGAAAGCGTGGGGAGCAAACAGG                                 |
| A  | S   | Ba    |        |         |           |             |  | TACGTAGGGGGCAAGCGTTATCCGGATTTACTGGGTGTAAAGGGAGCGTAGACGGCAGGGCAAGCCAGAAG  |
|    | V   | ct    | Firm   |         |           |             |  | TGAAAACGCAGAGCTTAACTTTGCGACTGCTTTTGAAACTGCCCAGCTAGAGTACAGGAGAGGTAAGTGGA  |
| 01 | eri | icute | Clostr | Lachnos | Lachnospi | Lachnospira |  | ATTCCTAGTGTAGCGGTGAAATGCGTAGATATTAGGAGGAACACCAGTGGCGAAGGCGGCTTACTGGACTG  |
| 9  | a   | s     | idia   | pirales | raceae    | ceae_Genus  |  | AGACTGACGTTGAGGCTCGAAAGCGTGGGGAGCAAACAGG                                 |
| A  | S   | Ba    |        |         |           |             |  | TACGTAGGGGGCAAGCGTTATCCGGATTTACTGGGTGTAAAGGGAGCGTAGGCGGTAATGCAAGTCAGAAG  |
|    | V   | ct    | Firm   |         |           |             |  | TGAAAGCCCGGGCTCAACTCCGGGACTGCTTTTGAAACTGTGTTGCTAGATTGCAGGAGAGGTAAGTGGA   |
| 24 | eri | icute | Clostr | Lachnos | Lachnospi | GCA-        |  | TTCTAGTGTAGCGGTGAAATGCGTAGATATTAGGAGGAACACCAGTGGCGAAGGCGGCTTACTGGACTGTA  |
| 6  | a   | s     | idia   | pirales | raceae    | 900066575   |  | AATGACGCTGAGGCTCGAAAGCGTGGGGAGCAAACAGG                                   |
| A  | S   | Ba    |        |         |           |             |  | TACGTAGGGGGCAAGCGTTATCCGGATTTACTGGGTGTAAAGGGAGCGTAGGCGGTGATGCAAGTCAGAAG  |
|    | V   | ct    | Firm   |         |           |             |  | TGAAAGCCCGCAGCTCAACTGCGGGACTGCTTTTGAAACTGTATGACTAGATTGCAGGAGAGGTAAGTGGA  |
| 20 | eri | icute | Clostr | Lachnos | Lachnospi | GCA-        |  | ATTCCTAGTGTAGCGGTGAAATGCGTAGATATTAGGAGGAACACCAGTGGCGAAGGCGGCTTACTGGACTGT |
| 8  | a   | s     | idia   | pirales | raceae    | 900066575   |  | AAATGACGCTGAGGCTCGAAAGCGTGGGGAGCAAACAGG                                  |
| A  | S   | Ba    |        |         |           |             |  | TACGTAGGGGGCAAGCGTTATCCGGATTTACTGGGTGTAAAGGGAGCGTAGGCGGTTTACGCAAGTCAGAAG |
|    | V   | ct    | Firm   |         |           |             |  | TGAAAGCCCGGGCTCAACTCCGGGACTGCTTTTGAAACTGTGAACTAGATTGCAGGAGAGGTAAGTGGA    |
| 10 | eri | icute | Clostr | Lachnos | Lachnospi | GCA-        |  | ATTCCTAGTGTAGCGGTGAAATGCGTAGATATTAGGAGGAACACCAGTGGCGAAGGCGGCTTACTGGACTGT |
| 0  | a   | s     | idia   | pirales | raceae    | 900066575   |  | AAATGACGCTGAGGCTCGAAAGCGTGGGGAGCAAACAGG                                  |
| A  | S   | Ba    |        |         |           |             |  | TACGTAGGGGGCAAGCGTTATCCGGATTTACTGGGTGTAAAGGGAGCGTAGGCGGTGCAGCAAGTCAGAAG  |
|    | V   | ct    | Firm   |         |           |             |  | TGAAAGCCCGGGCTCAACTCCGGGACTGCTTTTGAAACTGTGAACTAGATTGCAGGAGAGGTAAGTGGA    |
| 20 | eri | icute | Clostr | Lachnos | Lachnospi | GCA-        |  | ATTCCTAGTGTAGCGGTGAAATGCGTAGATATTAGGAGGAACACCAGTGGCGAAGGCGGCTTACTGGACTGT |
| 2  | a   | s     | idia   | pirales | raceae    | 900066575   |  | AAATGACGCTGAGGCTCGAAAGCGTGGGGAGCAAACAGG                                  |
| A  | S   | Ba    |        |         |           |             |  | TACGTAGGGGGCAAGCGTTATCCGGATTTACTGGGTGTAAAGGGAGCGTAGGCGGCGATGCAAGTCAGAAG  |
|    | V   | ct    | Firm   |         |           |             |  | TGAAAGCCCGGGCTCAACTCCGGGACTGCTTTTGAAACTGTATGGCTAGATTGCAGGAGAGGCAAGTGGA   |
| 10 | eri | icute | Clostr | Lachnos | Lachnospi | GCA-        |  | ATTCCTAGTGTAGCGGTGAAATGCGTAGATATTAGGAGGAACACCAGTGGCGAAGGCGGCTTGCTGGACTGT |
| 7  | a   | s     | idia   | pirales | raceae    | 900066575   |  | AAATGACGCTGAGGCTCGAAAGCGTGGGGAGCAAACAGG                                  |
| A  | S   | Ba    |        |         |           |             |  | TACGTAGGGGGCAAGCGTTATCCGGATTTACTGGGTGTAAAGGGAGCGTAGACGGTGATGCAAGTCAGAAG  |
|    | V   | ct    | Firm   |         |           |             |  | TGAAAGCCCGGGCTCAACTCCGGGACTGCTTTTGAAACTGTGTAAGTGGAGTGACAGGAGAGGTAAGCGGA  |
| 18 | eri | icute | Clostr | Lachnos | Lachnospi | Lachnospira |  | ATTCCTGGTGTAGCGGTGAAATGCGTAGATATCAGGAGGAACACCAGTGGCGAAGGCGGCTTACTGGACTG  |
| 9  | a   | s     | idia   | pirales | raceae    | _group      |  | TAACTGACGTTGAGGCTCGAAAGCGTGGGGAGCAAACAGG                                 |
| A  | ct  | Firm  |        |         |           |             |  | TACGTAGGGGGCAAGCGTTATCCGGATTTACTGGGTGTAAAGGGAGCGTAGACGGTGATGCAAGTCAGAAG  |
|    | S   | eri   | icute  | Lachnos | Lachnospi | Lachnospira |  | TGAAAGCCCGGGCTCAACTCCGGGACTGCTTTTGAAACTGTGTGACTGGAGTGACAGGAGAGGTAAGCGGA  |
| V  | a   | s     | idia   | pirales | raceae    | _group      |  | ATTCCTGGTGTAGCGGTGAAATGCGTAGATATCAGGAGGAACACCAGTGGCGAAGGCGGCTTACTGGACTG  |
|    |     |       |        |         |           |             |  | TAACTGACGTTGAGGCTCGAAAGCGTGGGGAGCAAACAGG                                 |

|    |     |       |        |         |           |               |                                                                           |
|----|-----|-------|--------|---------|-----------|---------------|---------------------------------------------------------------------------|
| 02 |     |       |        |         |           |               |                                                                           |
| 1  |     |       |        |         |           |               |                                                                           |
| A  |     |       |        |         |           |               |                                                                           |
| S  | Ba  |       |        |         |           |               | TACGTAGGGGGCAAGCGTTATCCGGATTTACTGGGTGTAAAGGGAGCGTAGACGGCTGTGCAAGTCAGAAG   |
| V  | ct  | Firm  |        |         |           |               | TGAAAGCCCGGGGCTCAACCGCGGGACTGCTTTTGAAACTGTGTAGCTGGAGTGCAGGAGAGGTAAGTGG    |
| 14 | eri | icute | Clostr | Lachnos | Lachnospi | Lachnospira   | ATTCTAGTGTAGCGGTGAAATGCGTAGATATTAGGAGGAACACCGGTGGCGAAGGCGGCTTACTGGACTGT   |
| 8  | a   | s     | idia   | pirales | raceae    | ceae_Genus    | AACTGACGTTGAGGCTCGAAAGCGTGCGGGAGCAAACAGG                                  |
| A  |     |       |        |         |           |               |                                                                           |
| S  | Ba  |       |        |         |           |               | TACGTAGGGGGCAAGCGTTATCCGGATTTACTGGGTGTAAAGGGAGCGTAGACGGCTGCGCAAGTCAGAAG   |
| V  | ct  | Firm  |        |         |           |               | TGAAAGCCCGGGGCTCAACCGCGGGACTGCTTTTGAAACTGTGTAGCTAGAGTGCAGGAGAGGTAAGTGG    |
| 19 | eri | icute | Clostr | Lachnos | Lachnospi | Lachnospira   | ATTCTAGTGTAGCGGTGAAATGCGTAGATATTAGGAGGAACACCGGTGGCGAAGGCGGCTTACTGGACTGT   |
| 9  | a   | s     | idia   | pirales | raceae    | ceae_Genus    | AACTGACGTTGAGGCTCGAAAGCGTGCGGGAGCAAACAGG                                  |
| A  |     |       |        |         |           |               |                                                                           |
| S  | Ba  |       |        |         |           |               | TACGTAGGGGGCAAGCGTTATCCGGATTTACTGGGTGTAAAGGGAGCGTAGACGGCTGTGCAAGTCAGAAG   |
| V  | ct  | Firm  |        |         |           |               | TGAAAGCCCGGGGCTCAACCGCGGGACTGCTTTTGAAACTGTGTAGCTAGAGTGCAGGAGAGGTAAGTGG    |
| 34 | eri | icute | Clostr | Lachnos | Lachnospi | Lachnospira   | ATTCTAGTGTAGCGGTGAAATGCGTAGATATTAGGAGGAACACCGGTGGCGAAGGCGGCTTACTGGACTGT   |
| 5  | a   | s     | idia   | pirales | raceae    | ceae_Genus    | AACTGACGTTGAGGCTCGAAAGCGTGCGGGAGCAAACAGG                                  |
| A  |     |       |        |         |           |               |                                                                           |
| S  | Ba  |       |        |         |           |               | TACGTAGGGGGCAAGCGTTATCCGGATTTACTGGGTGTAAAGGGAGCGTAGACGGCCAGACAAGTCAGAAG   |
| V  | ct  | Firm  |        |         |           |               | TGAAAACCCGCGGCTCAACTGCGGGAGTGCTTTTGAAACTGTGTGGCTGGAGTGCAGGAGAGGTAAGTGG    |
| 37 | eri | icute | Clostr | Lachnos | Lachnospi | Lachnospira   | ATTCTAGTGTAGCGGTGAAATGCGTAGATATTAGGAGGAACACCAGTGGCGAAGGCGGCTTACTGGACTGT   |
| 8  | a   | s     | idia   | pirales | raceae    | ceae_Genus    | AACTGACGTTGAGGCTCGAAAGCGTGCGGGAGCAAACAGG                                  |
| A  |     |       |        |         |           |               |                                                                           |
| S  | Ba  |       |        |         |           |               | TACGTAGGGGGCAAGCGTTATCCGGATTTACTGGGTGTAAAGGGAGCGTAGACGGCAATGCAAGCCAGATG   |
| V  | ct  | Firm  |        |         |           |               | TGAAAACCCGCGAGCTCAACTGGGGGAGTGCAATTTGAAACTGTGTAGCTGGAGTGCAGGAGAGGTAAGCGGA |
| 05 | eri | icute | Clostr | Lachnos | Lachnospi | Eisenbergiell | ATTCTGGTGTAGCGGTGAAATGCGTAGATATCAGGAGGAACACCAGTGGCGAAGGCGGCTTACTGGACTG    |
| 4  | a   | s     | idia   | pirales | raceae    | a             | TAACTGACGTTGAGGCTCGAAAGCGTGCGGGAGCAAACAGG                                 |
| A  |     |       |        |         |           |               |                                                                           |
| S  | Ba  |       |        |         |           |               | TACGTAGGGGGCAAGCGTTATCCGGATTTACTGGGTGTAAAGGGAGCGTAGACGGCGATGCAAGCCAGATG   |
| V  | ct  | Firm  |        |         |           |               | TGAAAGCCCGCGGCTCAACTGCGGTAGTGCAATTTGAAACTGTATGGCTGGAGTGCAGGAGAGGCAGGCGGA  |
| 07 | eri | icute | Clostr | Lachnos | Lachnospi | Lachnospira   | ATTCTAGTGTAGCGGTGAAATGCGTAGATATTAGGAGGAACACCAGTGGCGAAGGCGGCCTGCTGGACTG    |
| 5  | a   | s     | idia   | pirales | raceae    | ceae_Genus    | TAACTGACGTTGAGGCTCGAAAGCGTGCGGGAGCAAACAGG                                 |
| A  |     |       |        |         |           |               |                                                                           |
| S  | Ba  |       |        |         |           |               | TACGTAGGGGGCGAGCGTTATCCGGATTTACTGGGTGTAAAGGGAGCGTAGACGGCTGGTCAAGTCTGAAGT  |
| V  | ct  | Firm  |        |         |           |               | GAAAGCCCGGGGCTTAACCCCGGAACGGCTTTGAAACTGAGCAGCTAGAGTGTGAGAGGTAAGCGGA       |
| 21 | eri | icute | Clostr | Lachnos | Lachnospi | Lachnospira   | ATTCTAGTGTAGCGGTGAAATGCGTAGATATTAGGAGGAACACCAGTGGCGAAGGCGGCTTACTGGACAG    |
| 9  | a   | s     | idia   | pirales | raceae    | ceae_Genus    | TAACTGACGTTGAGGCTCGAAAGCGTGCGGGAGCAAACAGG                                 |
| A  |     |       |        |         |           |               |                                                                           |
| S  | Ba  |       |        |         |           |               | TACGTAGGGGGCGAGCGTTATCCGGATTTACTGGGTGTAAAGGGAGCGTAGACGGCTGGTCAAGTCTGAAGT  |
| V  | ct  | Firm  |        |         |           |               | GAAAGCCCGGGGCTTAACCCCGGAACGGTTTTGAAACTGAGCAGCTAGAGTGTGAGAGGTAAGCGGAA      |
| 43 | eri | icute | Clostr | Lachnos | Lachnospi | Lachnospira   | TTCCTAGTGTAGCGGTGAAATGCGTAGATATTAGGAGGAACACCAGTGGCGGAGGCGGCTTACTGGACAGT   |
| 8  | a   | s     | idia   | pirales | raceae    | ceae_Genus    | AACTGACGTTGAGGCTCGAAAGCGTGCGGGAGCAAACAGG                                  |

|    |     |       |        |         |           |               |  |                                                                            |
|----|-----|-------|--------|---------|-----------|---------------|--|----------------------------------------------------------------------------|
| A  | S   | Ba    |        |         |           |               |  | TACGTAGGGGGCGAGCGTTATCCGGATTTACTGGGTGTAAAGGGAGCGTAGACGGTTCTGCAAGTCTGAAAGT  |
|    | V   | ct    | Firm   |         |           |               |  | GAAAGCCCGTGGCTTAACCGCGGAACGGCTTTGGAAACTGTGGAAGTGGAGTGTCTGGAGAGGCAAGCGGAA   |
| 09 | eri | icute | Clostr | Lachnos | Lachnospi | Lachnospi     |  | TTCCTAGTGTAGCGGTGAAATGCGTAGATATTAGGAGGAACACCAGTGGCGAAGGCGGCTTGCTGGACAGT    |
| 2  | a   | s     | idia   | pirales | raceae    | ceae_Genus    |  | AACTGACGTTGAGGCTCGAAAGCGTGGGGAGCAAACAGG                                    |
| A  | S   | Ba    |        |         |           |               |  | TACGTAGGGGGGCAAGCGTTATCCGGATTTACTGGGTGTAAAGGGAGCGTAGACGGTTGTGCAAGTCTGAAAGT |
|    | V   | ct    | Firm   |         |           |               |  | GAAAGCCCGCGGCTCAACTGCGGAACGGCTTTGGAAACTGTGTAAGTGGAGTGTCTGGAGAGGTAAGCGGAA   |
| 07 | eri | icute | Clostr | Lachnos | Lachnospi | Lachnospi     |  | TTCCTGGTGTAGCGGTGAAATGCGTAGAGATCAGGAGGAACACCGGCGGCGAAGGCGGCTTACTGGACAGT    |
| 9  | a   | s     | idia   | pirales | raceae    | ceae_Genus    |  | AACTGACGTTGAGGCTCGAAAGCGTGGGGAGCAAACAGG                                    |
| A  | S   | Ba    |        |         |           |               |  | TACGTAGGGGGCGAGCGTTATCCGGATTTACTGGGTGTAAAGGGAGCGTAGACGGCGTCGCAAGTCTGAAG    |
|    | V   | ct    | Firm   |         |           |               |  | TGAAAGCCCGTGGCTCAACCGCGGAACCGCTTTGGAAACTGCGAGGCTGGAGTGTCTGGAGAGGTAAGCGGA   |
| 12 | eri | icute | Clostr | Lachnos | Lachnospi | Lachnospi     |  | ATTCCTGGTGTAGCGGTGAAATGCGTAGATATCAGGAGGAACACCGGTGGCGAAGGCGGCTTACTGGACAG    |
| 0  | a   | s     | idia   | pirales | raceae    | ceae_Genus    |  | TGACTGACGTTGAGGCTCGAAAGCGTGGGGAGCGAACAGG                                   |
| A  | S   | Ba    |        |         |           |               |  | TACGTAGGGGGCGAGCGTTATCCGGATTTACTGGGTGTAAAGGGAGCGTAGACGGCGTCGCAAGTCTGAAG    |
|    | V   | ct    | Firm   |         |           |               |  | TGAAAGCCCGTGGCTCAACTGCGGAACCGCTTTGGAAACTGCGAGGCTGGAGTGTCTGGAGAGGTAAGCGGA   |
| 34 | eri | icute | Clostr | Lachnos | Lachnospi | Lachnospi     |  | ATTCCTGGTGTAGCGGTGAAATGCGTAGATATCAGGAGGAACACCGGTGGCGAAGGCGGCTTACTGGACAG    |
| 2  | a   | s     | idia   | pirales | raceae    | ceae_Genus    |  | TGACTGACGTTGAGGCTCGAAAGCGTGGGGAGCGAACAGG                                   |
| A  | S   | Ba    |        |         |           |               |  | TACGTAGGGGGGCAAGCGTTATCCGGATTTACTGGGTGTAAAGGGAGCGTAGACGGCTGTGCAAGTCTGAAAGT |
|    | V   | ct    | Firm   |         |           |               |  | GAAAGCCCGTGGCTCAACCGCGGAAGTGTCTTTGGAAACTGTATAGCTTGAGTACTGGAGAGGCAGGCGGAA   |
| 10 | eri | icute | Clostr | Lachnos | Lachnospi | Lachnospi     |  | TTCCTAGTGTAGCGGTGAAATGCGTAGATATTAGGAGGAACACCAGTGGCGAAGGCGGCTTGCTGGACAGA    |
| 8  | a   | s     | idia   | pirales | raceae    | ceae_Genus    |  | AACTGACGTTGAGGCTCGAAAGCGTGGGGAGCAAACAGG                                    |
| A  | S   | Ba    |        |         |           |               |  | TACGTAGGGGGGCAAGCGTTATCCGGATTTACTGGGTGTAAAGGGAGCGTAGACGGCTGTACAAGTCTGAAAGT |
|    | V   | ct    | Firm   |         |           |               |  | GAAAGCCCGTGGCTCAACCGCGGAAGTGTCTTTGGAAACTGTAAAGCTGGAGTACTGGAGAGGCAGGCGGAA   |
| 11 | eri | icute | Clostr | Lachnos | Lachnospi | Lachnospi     |  | TTCCTAGTGTAGCGGTGAAATGCGTAGATATTAGGAGGAACACCAGTGGCGAAGGCGGCTTGCTGGACAGA    |
| 8  | a   | s     | idia   | pirales | raceae    | ceae_Genus    |  | AACTGACGTTGAGGCTCGAAAGCGTGGGGAGCAAACAGG                                    |
| A  | S   | Ba    |        |         |           |               |  | TACGTAGGGGGGCAAGCGTTATCCGGATTTACTGGGTGTAAAGGGAGCGCAGACGGCAGTGCAAGTCTGGAG   |
|    | V   | ct    | Firm   |         |           |               |  | TGAAAGCCCGGGGCCCCAACCCCGGAAGTGTCTGGAAGTGTGCGGCTAGAGTACTGGAGGGGCAGGCGGA     |
| 10 | eri | icute | Clostr | Lachnos | Lachnospi | Lachnospi     |  | ATTCCTAGTGTAGCGGTGAAATGCGTAGATATTAGGAGGAACACCAGTGGCGAAGGCGGCTTGCTGGACAG    |
| 5  | a   | s     | idia   | pirales | raceae    | ceae_Genus    |  | TAACTGACGTTGAGGCTCGAAAGCGTGGGGAGCAAACAGG                                   |
| A  | S   | Ba    |        |         |           |               |  | TACGTAGGGGGGCAAGCGTTATCCGGATTTACTGGGTGTAAAGGGAGCGCAGACGGCAGCGCAAGTCTGGAG   |
|    | V   | ct    | Firm   |         |           |               |  | TGAAAGCCCGGGGCCCCAACCCCGGAAGTGTCTGGAAGTGTGCGGCTAGAGTACTGGAGGGGCAGGCGGA     |
| 31 | eri | icute | Clostr | Lachnos | Lachnospi | Lachnospi     |  | ATTCCTAGTGTAGCGGTGAAATGCGTAGATATTAGGAGGAACACCAGTGGCGAAGGCGGCTTGCTGGACAG    |
| 9  | a   | s     | idia   | pirales | raceae    | ceae_Genus    |  | TAACTGACGTTGAGGCTCGAAAGCGTGGGGAGCAAACAGG                                   |
| A  | ct  | Firm  |        |         |           |               |  | TACGTAGGGGGCAAGCGTTATCCGGATTTACTGGGTGTAAAGGGAGCGTAGACGGCGCTGCAAGTCCGGAG    |
|    | S   | eri   | icute  | Clostr  | Lachnos   | Lachnospi     |  | TGAAAGCCCATGGCTTAACCATGGTACTGCTCTGGAAGTGTGAGCTTGAGTGCAGGAGGGGCAGGCGGA      |
| V  | a   | s     | idia   | pirales | raceae    | Acetatifactor |  | ATTCCTAGTGTAGCGGTGAAATGCGTAGATATTAGGAGGAACACCAGGCGGCGAAGGCGGCTTGCTGGACCG   |
|    |     |       |        |         |           |               |  | TAACTGACGTTGAGGCTCGAAAGCGTGGGGAGCAAACAGG                                   |

|    |     |       |        |         |           |               |                                                                          |
|----|-----|-------|--------|---------|-----------|---------------|--------------------------------------------------------------------------|
| 06 |     |       |        |         |           |               |                                                                          |
| 2  |     |       |        |         |           |               |                                                                          |
| A  |     |       |        |         |           |               |                                                                          |
| S  | Ba  |       |        |         |           |               | TACGTAGGGGGCAAGCGTTATCCGGATTTACTGGGTGTAAAGGGAGCGTAGACGGCAGCGCAAGTCCGAAG  |
| V  | ct  | Firm  |        |         |           |               | TGAAAGCCCGGGGCCCAACCCCGGGACTGCTTTGGAAACTGTGAAGCTGGAGTGCGGGAGGGGCAGGCGG   |
| 07 | eri | icute | Clostr | Lachnos | Lachnospi |               | AATTCCTGGTGTAGCGGTGAAATGCGTAGATATCAGGAGGAACACCGGCGGCGAAGGCGGCCTGCTGGACC  |
| 6  | a   | s     | idia   | pirales | raceae    | Acetatifactor | GTAAGTACGTTGAGGCTCGAAAAGCGTGCGGGAGCAAACAGG                               |
| A  |     |       |        |         |           |               |                                                                          |
| S  | Ba  |       |        |         |           |               | TACGTAGGGGGCAAGCGTTATCCGGATTTACTGGGTGTAAAGGGAGCGTAGACGGCAGCGCAAGTCCGAAG  |
| V  | ct  | Firm  |        |         |           |               | TGAAAGCCCGGGGCCCAACCCCGGGACTGCTTTGGAAACTGTGTAAGTGGAGTACAGGAGGGGCAGGCGGA  |
| 36 | eri | icute | Clostr | Lachnos | Lachnospi |               | ATTCTGGTGTAGCGGTGAAATGCGTAGATATCAGGAGGAACACCGGCGGCGAAGGCGGCCTGCTGGACTG   |
| 3  | a   | s     | idia   | pirales | raceae    | Acetatifactor | AAACTGACGTTGAGGCTCGAAAGCGTGCGGGAGCAAACAGG                                |
| A  |     |       |        |         |           |               |                                                                          |
| S  | Ba  |       |        |         |           |               | TACGTAGGGGGCAAGCGTTATCCGGATTTACTGGGTGTAAAGGGAGCGTAGACGGTATGTAAGTCTGGAGT  |
| V  | ct  | Firm  |        |         |           |               | GAAAGCCCGGGGCCCAACCCCGGGACTGCTTTGGAAACTGTGTAAGTGGAGTACAGGAGGGGCAGGCGGA   |
| 02 | eri | icute | Clostr | Lachnos | Lachnospi | Lachnospira   | ATTCTGGTGTAGCGGTGAAATGCGTAGATATCAGGAGGAACACCGGCGGCGAAGGCGGCCTGCTGGACTG   |
| 6  | a   | s     | idia   | pirales | raceae    | ceae_Genus    | AAACTGACGTTGAGGCTCGAAAGCGTGCGGGAGCAAACAGG                                |
| A  |     |       |        |         |           |               |                                                                          |
| S  | Ba  |       |        |         |           |               | TACGTAGGGGGCAAGCGTTATCCGGATTTACTGGGTGTAAAGGGAGCGTAGACGGTGTATAAGTCTGGAGT  |
| V  | ct  | Firm  |        |         |           |               | GAAAGCCCGGGGCCCAACCCCGGGACTGCTTTGGAAACTGTGTAAGTGGAGTACAGGAGGGGCAGGCGGA   |
| 38 | eri | icute | Clostr | Lachnos | Lachnospi |               | TTCCTGGTGTAGCGGTGAAATGCGTAGATATCAGGAGGAACACCGGCGGCGAAGGCGGCCTGCTGGACTGA  |
| 4  | a   | s     | idia   | pirales | raceae    | Acetatifactor | AACTGACGTTGAGGCTCGAAAGCGTGCGGGAGCAAACAGG                                 |
| A  |     |       |        |         |           |               |                                                                          |
| S  | Ba  |       |        |         |           |               | TACGTAGGGGGCAAGCGTTATCCGGATTTACTGGGTGTAAAGGGAGCGTAGACGGCAGAGCAAGTCCGGAG  |
| V  | ct  | Firm  |        |         |           |               | TGAAAGCCCGGGGCCCAACCCCGGGACTGCTCTGGAAACTGTGTAAGCTGGAGTGCGGGAGGGGCAGGCGGA |
| 09 | eri | icute | Clostr | Lachnos | Lachnospi |               | ATTCTGGTGTAGCGGTGAAATGCGTAGATATCAGGAGGAACACCGGCGGCGAAGGCGGCCTGCTGGACCG   |
| 6  | a   | s     | idia   | pirales | raceae    | Acetatifactor | TGACTGACGTTGAGGCTCGAAAGCGTGCGGGAGCAAACAGG                                |
| A  |     |       |        |         |           |               |                                                                          |
| S  | Ba  |       |        |         |           |               | TACGTAGGGGGCAAGCGTTATCCGGATTTACTGGGTGTAAAGGGAGCGTAGACGGCAGAGCAAGTCCGGAG  |
| V  | ct  | Firm  |        |         |           |               | TGAAAGCCCGGGGCCCAACCCCGGGACTGCTCTGGAAACTGTGTAAGCTGGAGTACGGGAGGGGCAGGCGGA |
| 24 | eri | icute | Clostr | Lachnos | Lachnospi |               | ATTCTGGTGTAGCGGTGAAATGCGTAGATATCAGGAGGAACACCGGCGGCGAAGGCGGCCTGCTGGACCG   |
| 2  | a   | s     | idia   | pirales | raceae    | Acetatifactor | TGACTGACGTTGAGGCTCGAAAGCGTGCGGGAGCAAACAGG                                |
| A  |     |       |        |         |           |               |                                                                          |
| S  | Ba  |       |        |         |           |               | TACGTAGGGGGCAAGCGTTATCCGGATTACTGGGTGTAAAGGGAGCGTAGACGGCCATGCAAGCCTGGAG   |
| V  | ct  | Firm  |        |         |           |               | TGAAAGCCCGGGGCCCAACCCCGGGACTGCTCTGGAAACTGTGAAGCTGGAGTGCGGGAGGGGCAGGCGG   |
| 40 | eri | icute | Clostr | Lachnos | Lachnospi | Lachnospira   | AATTCCTGGTGTAGCGGTGAAATGCGTAGATATTAGGAGGAACACCAGTGCGGAAGGCGGCTTACTGGACT  |
| 9  | a   | s     | idia   | pirales | raceae    | ceae_Genus    | GTAAGTACGTTGAGGCTCGAAAAGCGTGCGGGAGCAAACAGG                               |
| A  |     |       |        |         |           |               |                                                                          |
| S  | Ba  |       |        |         |           |               | TACGTAGGGGGCAAGCGTTATCCGGATTACTGGGTGTAAAGGGAGCGTAGACGGCCATGCAAGCCTGGAG   |
| V  | ct  | Firm  |        |         |           |               | TGAAAGCCCGGGGCCCAACCCCGGGACTGCTCTGGAAACTGTGCGGCTGGAGTGCGGGAGGGGCAGGCGG   |
| 05 | eri | icute | Clostr | Lachnos | Lachnospi |               | AATTCCTGGTGTAGCGGTGAAATGCGTAGATATCAGGAGGAACACCGGCGGCGAAGGCGGCCTGCTGGACC  |
| 6  | a   | s     | idia   | pirales | raceae    | Acetatifactor | GCGACTGACGTTGAGGCTCGAAAAGCGTGCGGGAGCAAACAGG                              |

|    |     |       |        |         |           |               |             |                                                                         |
|----|-----|-------|--------|---------|-----------|---------------|-------------|-------------------------------------------------------------------------|
| A  | S   | Ba    |        |         |           |               |             | TACGTAGGGGGCGAGCGTTATCCGGATTCACTGGGTGTAAAGGGAGCGTAGACGGCCGTGCAAGCCAGGAG |
|    | V   | ct    | Firm   |         |           |               |             | TGAAAGCCCGGGGCCCAACCCCGGGACTGCTCTTGAACTGTGCGGCTGGAGTGCGGGAGGGGCAGGCCGA  |
| 25 | eri | icute | Clostr | Lachnos | Lachnospi |               |             | ATTCTGGTGTAGCGGTGAAATGCGTAGATATCAGGAGGAACACCGGCGGCGAAGGCGGCCTGCTGGACCG  |
| 7  | a   | s     | idia   | pirales | raceae    | Acetatifactor |             | CGACTGACGTTGAGGCTCGAAAGCGTGGGGAGCGAACAGG                                |
| A  | S   | Ba    |        |         |           |               |             | TACGTAGGGGGCGAGCGTTATCCGGATTCACTGGGTGTAAAGGGAGCGTAGACGGCCGTGCAAGCCAGGAG |
|    | V   | ct    | Firm   |         |           |               |             | TGAAAGCCCGGGGCCCAACCCCGGGACTGCTCTTGAACTGTGCGACTGGAGTGCGGGAGGGGCAGGCCGA  |
| 33 | eri | icute | Clostr | Lachnos | Lachnospi |               |             | ATTCTGGTGTAGCGGTGAAATGCGTAGATATCAGGAGGAACACCGGCGGCGAAGGCGGCCTGCTGGACCG  |
| 5  | a   | s     | idia   | pirales | raceae    | Acetatifactor |             | CGACTGACGTTGAGGCTCGAAAGCGTGGGGAGCGAACAGG                                |
| A  | S   | Ba    |        |         |           |               |             | TACGTAGGGGGCGAGCGTTATCCGGATTCACTGGGTGTAAAGGGAGCGTAGACGGCCATGCAAGCCAGGGG |
|    | V   | ct    | Firm   |         |           |               |             | TGAAAGCCCGGGGCCCAACCCCGGGACTGCCCTTGAACTGTGCGGCTAGAGTGCGGGAGGGGCAGGCCGA  |
| 23 | eri | icute | Clostr | Lachnos | Lachnospi |               |             | ATTCTGGTGTAGCGGTGAAATGCGTAGATATCAGGAGGAACACCGGCGGCGAAGGCGGCCTGCTGGACCG  |
| 5  | a   | s     | idia   | pirales | raceae    | Acetatifactor |             | CGACTGACGTTGAGGCTCGAAAGCGTGGGGAGCGAACAGG                                |
| A  | S   | Ba    |        |         |           |               |             | TACGTAGGGGGCGAGCGTTATCCGGATTCACTGGGTGTAAAGGGAGCGTAGACGGCCATGCAAGCCAGGGG |
|    | V   | ct    | Firm   |         |           |               |             | TGAAAGCCCGGGGCCCAACCCCGGGACTGCCCTTGAACTGCATGGCTGGAGTGCGGGAGGGGCAGGCCGA  |
| 10 | eri | icute | Clostr | Lachnos | Lachnospi |               |             | ATTCTGGTGTAGCGGTGAAATGCGTAGATATCAGGAGGAACACCGGCGGCGAAGGCGGCCTGCTGGACCG  |
| 2  | a   | s     | idia   | pirales | raceae    | Acetatifactor |             | CGACTGACGTTGAGGCTCGAAAGCGTGGGGAGCGAACAGG                                |
| A  | S   | Ba    |        |         |           |               |             | TACGTAGGGGGCGAGCGTTATCCGGATTCACTGGGTGTAAAGGGAGCGTAGACGGCCAAGCAAGCCAGGGG |
|    | V   | ct    | Firm   |         |           |               |             | TGAAAGCCCGGGGCCCAACCCCGGGACTGCCCTTGAACTGCATGGCTGGAGTGCGGGAGGGGCAGGCCGA  |
| 23 | eri | icute | Clostr | Lachnos | Lachnospi |               |             | ATTCTGGTGTAGCGGTGAAATGCGTAGATATCAGGAGGAACACCGGCGGCGAAGGCGGCCTGCTGGACCG  |
| 2  | a   | s     | idia   | pirales | raceae    | Acetatifactor |             | CGACTGACGTTGAGGCTCGAAAGCGTGGGGAGCGAACAGG                                |
| A  | S   | Ba    |        |         |           |               |             | TACGTAGGGGGCAAGCGTTATCCGGATTCACTGGGTGTAAAGGGAGCGTAGACGGCCAGGCAAGCCTGGAG |
|    | V   | ct    | Firm   |         |           |               |             | TGAAAGCCCGGGGCCCAACCCCGGGACTGCTCTGGGAACTGTCCGGCTGGAGTGCGGGAGGGGCAGGCCGA |
| 30 | eri | icute | Clostr | Lachnos | Lachnospi |               |             | ATTCTGGTGTAGCGGTGAAATGCGTAGATATCAGGAGGAACACCGGCGGCGAAGGCGGCCTGCTGGACCG  |
| 4  | a   | s     | idia   | pirales | raceae    | Acetatifactor |             | CGACTGACGTTGAGGCTCGAAAGCGTGGGGAGCGAACAGG                                |
| A  | S   | Ba    |        |         |           |               |             | TACGTAGGGGGCAAGCGTTATCCGGATTTACTGGGTGTAAAGGGGGCGCAGACGGCGATGCAAGCCAGGAG |
|    | V   | ct    | Firm   |         |           |               |             | TGAAAGCCCGGGGCCCAACCCCGGGACTGCTCTTGAACTGCGCGGCTGGAGTGCAAGAGGGGCAGGCCGA  |
| 37 | eri | icute | Clostr | Lachnos | Lachnospi | Lachnospira   |             | ATTCTGGTGTAGCGGTGAAATGCGTAGATATCAGGAGGAACACCGGTGGCGAAGGCGGCCTGCTGGACTG  |
| 5  | a   | s     | idia   | pirales | raceae    | ceae_Genus    |             | CGACTGACGTTGAGGCCCGAAAGCGTGGGGAGCAAACAGG                                |
| A  | S   | Ba    |        |         |           |               |             | TACGTAGGGGGCAAGCGTTATCCGGATTTACTGGGTGTAAAGGGGGCGCAGACGGCGATGCAAGCCAGGAG |
|    | V   | ct    | Firm   |         |           |               |             | TGAAAGCCCGGGGCCCAACCCCGGGACTGCTCTTGAACTGCGTGGCTGGAGTGCAAGAGGGGCAGGCCGA  |
| 07 | eri | icute | Clostr | Lachnos | Lachnospi | Lachnospira   |             | ATTCTGGTGTAGCGGTGAAATGCGTAGATATCAGGAGGAACACCGGTGGCGAAGGCGGCCTGCTGGACTG  |
| 2  | a   | s     | idia   | pirales | raceae    | ceae_Genus    |             | CAACTGACGTTGAGGCCCGAAAGCGTGGGGAGCAAACAGG                                |
| A  | ct  | Firm  |        |         |           |               |             | TACGTAGGGGGCAAGCGTTATCCGGATTTACTGGGTGTAAAGGGGGCGCAGACGGCAATGCAAGCCAGGAG |
|    | S   | eri   | icute  | Clostr  | Lachnos   | Lachnospi     | Lachnospira | TGAAAGCCCGGGGCCCAACCCCGGGACTGCTCTTGAACTGCATGGCTGGAGTACAGGAGGGGCAGGCCGA  |
|    | V   | a     | s      | idia    | pirales   | raceae        | ceae_Genus  | ATTCTAGTGTAGCGGTGAAATGCGTAGATATTAGGAGGAACACCGGTGGCGAAGGCGGCCTGCTGGACTGT |
|    |     |       |        |         |           |               |             | GACTGACGTTGAGGCCCGAAGGCGTGGGGAGCAAACAGG                                 |

|    |     |       |        |         |           |              |                                                                          |
|----|-----|-------|--------|---------|-----------|--------------|--------------------------------------------------------------------------|
| 11 |     |       |        |         |           |              |                                                                          |
| 2  |     |       |        |         |           |              |                                                                          |
| A  |     |       |        |         |           |              |                                                                          |
| S  | Ba  |       |        |         |           |              | TACGTAGGGGGCAAGCGTTATCCGGATTTACTGGGTATAAAGGGGGCGCAGACGGCAATGCAAGCCAGGAG  |
| V  | ct  | Firm  |        |         |           |              | TGAAAGCCCGGGGCCCAACCCCGGGACTGCTTTGGAACTGCATGGCTGGAGTACAGGAGGGGCAGGCGGA   |
| 29 | eri | icute | Clostr | Lachnos | Lachnospi | Lachnospira  | ATTCCTAGTGTAGCGGTGAAATGCGTAGATATTAGGAGGAACACCGGTGGCGAAGGCGGCTTCTGGACTGT  |
| 6  | a   | s     | idia   | pirales | raceae    | ceae_Genus   | GACTGACGTTGAGGCCCGAAGGCGTGCGGAGCAAACAGG                                  |
| A  |     |       |        |         |           |              |                                                                          |
| S  | Ba  |       |        |         |           |              | TACGTAGGGGGCAAGCGTTATCCGGATTTACTGGGTGTAAAGGGAGCGTAGACGGCTGCGCAAGTCTGAAG  |
| V  | ct  | Firm  |        |         |           |              | TGAAAGCCCGGGGCTCAACCCCGGGACTGCTTTGGAACTGTGTAGCTAGAGTGTCTGGAGAGGCAAGCGGA  |
| 17 | eri | icute | Clostr | Lachnos | Lachnospi | Lachnoclostr | ATTCCTAGTGTAGCGGTGAAATGCGTAGATATTAGGAAGAACACCAGTGGCGAAGGCGGCTTGTCTGGACAG |
| 8  | a   | s     | idia   | pirales | raceae    | idium        | TAACTGACGTTGAGGCTCGAAAAGCGTGCGGAGCAAACAGG                                |
| A  |     |       |        |         |           |              |                                                                          |
| S  | Ba  |       |        |         |           |              | TACGTAGGGGGCAAGCGTTATCCGGATTTACTGGGTGTAAAGGGAGCGTAGACGGTGAGACAAGTCTGAAG  |
| V  | ct  | Firm  |        |         |           |              | TGAAAGCCCGGGGCTCAACCCCGGGACTGCTTTGGAACTGCCTGACTGGAGTGTCTGGAGAGGCAAGCGGA  |
| 08 | eri | icute | Clostr | Lachnos | Lachnospi | Lachnospira  | ATTCCTAGTGTAGCGGTGAAATGCGTAGATATTAGGAAGAACACCAGTGGCGAAGGCGGCTTGTCTGGACAG |
| 6  | a   | s     | idia   | pirales | raceae    | ceae_Genus   | TAACTGACGTTGAGGCTCGAAAAGCGTGCGGAGCAAACAGG                                |
| A  |     |       |        |         |           |              |                                                                          |
| S  | Ba  |       |        |         |           |              | TACGTAGGGGGCAAGCGTTATCCGGATTTACTGGGTGTAAAGGGAGCGTAGACGGCGATGCAAGTCTGAAG  |
| V  | ct  | Firm  |        |         |           |              | TGAAAGCCCGGGGCTCAACCCCGGGACTGCTTTGGAACTGTATGGCTGGAGTGTCTGGAGAGGCAAGCGGA  |
| 14 | eri | icute | Clostr | Lachnos | Lachnospi | Lachnoclostr | ATTCCTAGTGTAGCGGTGAAATGCGTAGATATTAGGAAGAACACCAGTGGCGAAGGCGGCTTGTCTGGACAG |
| 0  | a   | s     | idia   | pirales | raceae    | idium        | TAACTGACGTTGAGGCTCGAAAAGCGTGCGGAGCAAACAGG                                |
| A  |     |       |        |         |           |              |                                                                          |
| S  | Ba  |       |        |         |           |              | TACGTAGGGGGCAAGCGTTATCCGGATTTACTGGGTGTAAAGGGAGCGTAGACGGCAGAGAAAAGTCTGAAG |
| V  | ct  | Firm  |        |         |           | Lachnospira  | TGAAAGCCCGCGGCTCAACCGCGGAAGTCTTTGGAACTTTTCGGCTAGAGTACCGGAGAGGTAAGCGGA    |
| 35 | eri | icute | Clostr | Lachnos | Lachnospi | ceae_UCG-    | ATTCCTAGTGTAGCGGTGAAATGCGTAGATATTAGGAGGAACACCAGTGGCGAAGGCGGCTTACTGGACGG  |
| 8  | a   | s     | idia   | pirales | raceae    | 002          | TAACTGACGTTGAGGCTCGAAAAGCGTGCGGAGCAAACAGG                                |
| A  |     |       |        |         |           |              |                                                                          |
| S  | Ba  |       |        |         |           |              | TACGTAGGGGGCAAGCGTTATCCGGATTTACTGGGTGTAAAGGGAGCGTAGACGGCGAAGAAAAGTCTGAAG |
| V  | ct  | Firm  |        |         |           |              | TGAAAGCCCGCGGCTCAACCGCGGAAGTCTTTGGAACTTTTGTCTGGAGTACCGGAGAGGTAAGCGGAA    |
| 13 | eri | icute | Clostr | Lachnos | Lachnospi | Lachnospira  | TTCTAGTGTAGCGGTGAAATGCGTAGATATTAGGAGGAACACCAGTGGCGAAGGCGGCTTACTGGACGGT   |
| 0  | a   | s     | idia   | pirales | raceae    | ceae_Genus   | AACTGACGTTGAGGCTCGAAAAGCGTGCGGAGCAAACAGG                                 |
| A  |     |       |        |         |           |              |                                                                          |
| S  | Ba  |       |        |         |           |              | TACGTAGGGGGCAAGCGTTATCCGGATTTACTGGGTGTAAAGGGAGCGTAGACGGCGAAGAAAAGTCTGAAG |
| V  | ct  | Firm  |        |         |           |              | TGAAAGCCCGCGGCTTAACCGCGGAAGTCTTTGGAACTTTTGTCTGGAGTACCGGAGAGGTAAGCGGAA    |
| 30 | eri | icute | Clostr | Lachnos | Lachnospi | Lachnospira  | TTCTAGTGTAGCGGTGAAATGCGTAGATATTAGGAGGAACACCAGTGGCGAAGGCGGCTTACTGGACGGT   |
| 3  | a   | s     | idia   | pirales | raceae    | ceae_Genus   | AACTGACGTTGAGGCTCGAAAAGCGTGCGGAGCAAACAGG                                 |
| A  |     |       |        |         |           |              |                                                                          |
| S  | Ba  |       |        |         |           |              | TACGTAGGGGGCAAGCGTTATCCGGATTTACTGGGTGTAAAGGGAGCGTAGACGGCAGAGCAAGTCTGAAG  |
| V  | ct  | Firm  |        |         |           |              | TGAAAGCCCGCGGCCCAACTCGGGACTGCTTTGGAACTGCCCGGCTAGAGTGTCTGGAGAGGTAAGCGGA   |
| 07 | eri | icute | Clostr | Lachnos | Lachnospi | Lachnospira  | ATTCCTAGTGTAGCGGTGAAATGCGTAGATATTAGGAGGAACACCAGTGGCGAAGGCGGCTTACTGGACAG  |
| 1  | a   | s     | idia   | pirales | raceae    | ceae_Genus   | TAACTGACGTTGAGGCTCGAAAAGCGTGCGGAGCAAACAGG                                |

|    |     |       |        |         |           |              |  |                                                                          |
|----|-----|-------|--------|---------|-----------|--------------|--|--------------------------------------------------------------------------|
| A  | S   | Ba    |        |         |           |              |  | TACGTAGGGGGCAAGCGTTATCCGGATTTACTGGGTGTAAAGGGAGCGTAGACGGTAGAGCAAGTCTGAAG  |
|    | V   | ct    | Firm   |         |           |              |  | TGAAAGCCCGGGCTCAACTGCGGGACTGCTTTGGAACTGTTCAACTGGAGTGCTGGAGAGGTAAGCGGA    |
| 22 | eri | icute | Clostr | Lachnos | Lachnospi | Lachnoclostr |  | ATTCCTAGTGTAGCGGTGAAATGCGTAGATATTAGGAGGAACACCAGTGCGGAAGGCGGCTTACTGGACAG  |
| 4  | a   | s     | idia   | pirales | raceae    | idium        |  | TAACTGACGTTGAGGCTCGAAAGCGTGGGGAGCAAACAGG                                 |
| A  | S   | Ba    |        |         |           |              |  | TACGTAGGGGGCAAGCGTTATCCGGATTTACTGGGTGTAAAGGGAGCGTAGACGGCAGGGCAAGTCTGGAG  |
|    | V   | ct    | Firm   |         |           |              |  | TGAAAGCCCGGGGCCAACCCCGGGACTGCTTTGGAACTGCCATGCTGGAGTGCTGGAGAGGTAAGCGGA    |
| 21 | eri | icute | Clostr | Lachnos | Lachnospi | Lachnoclostr |  | ATTCCTAGTGTAGCGGTGAAATGCGTAGATATTAGGAGGAACACCAGTGCGGAAGGCGGCTTACTGGACAG  |
| 8  | a   | s     | idia   | pirales | raceae    | idium        |  | TAACTGACGTTGAGGCTCGAAAGCGTGGGGAGCAAACAGG                                 |
| A  | S   | Ba    |        |         |           |              |  | TACGTAGGGGGCAAGCGTTATCCGGATTTACTGGGTGTAAAGGGAGCGTAGACGGCGCGGCAAGTCTGAAG  |
|    | V   | ct    | Firm   |         |           |              |  | TGAAAGGCAGGGGCTTAACCCCTGAACTGCTTTGGAACTGCCATGCTAGAGTGCTGGAGAGGTAAGTGGGA  |
| 04 | eri | icute | Clostr | Lachnos | Lachnospi | Lachnospira  |  | ATTCCTAGTGTAGCGGTGAAATGCGTAGATATTAGGAGGAACACCAGTGCGGAAGGCGGCTTACTGGACAG  |
| 2  | a   | s     | idia   | pirales | raceae    | ceae_Genus   |  | TAACTGACGTTGAGGCTCGAAAGCGTGGGGAGCAAACAGG                                 |
| A  | S   | Ba    |        |         |           |              |  | TACGTAGGGGGCAAGCGTTATCCGGATTTACTGGGTGTAAAGGGAGCGTAGACGGTGAGGCAAGTCTGAAG  |
|    | V   | ct    | Firm   |         |           |              |  | TGAAAGCCCGGGGCTTAACCCCGGGACTGCTTTGGAACTGTCTGACTGGAGTGCTGGAGAGGTAAGTGGGA  |
| 16 | eri | icute | Clostr | Lachnos | Lachnospi | Lachnospira  |  | ATTCCTAGTGTAGCGGTGAAATGCGTAGATATTAGGAGGAACACCAGTGCGGAAGGCGGCTTACTGGACAG  |
| 1  | a   | s     | idia   | pirales | raceae    | ceae_Genus   |  | TAACTGACGTTGAGGCTCGAAAGCGTGGGGAGCAAACAGG                                 |
| A  | S   | Ba    |        |         |           |              |  | TACGTAGGGGGCAAGCGTTATCCGGATTTACTGGGTGTAAAGGGAGCGTAGACGGTGAGGCAAGTCTGAAG  |
|    | V   | ct    | Firm   |         |           |              |  | TGAAAGCCCGGGGCTTAACCCCGGGACTGCTTTGGAACTGTCTGACTGGAGTGCTGGAGAGGTAAGTGGGA  |
| 19 | eri | icute | Clostr | Lachnos | Lachnospi | Lachnospira  |  | ATTCCTAGTGTAGCGGTGAAATGCGTAGATATTAGGAGGAACACCAGTGCGGAAGGCGGCTTACTGGACAG  |
| 4  | a   | s     | idia   | pirales | raceae    | ceae_Genus   |  | TAACTGACGTTGAGGCTCGAAAGCGTGGGGAGCAAACAGG                                 |
| A  | S   | Ba    |        |         |           |              |  | TACGTAGGGGGCAAGCGTTATCCGGATTTACTGGGTGTAAAGGGAGCGTAGACGGTGCGTCAAGTCTGAAGT |
|    | V   | ct    | Firm   |         |           |              |  | GAAAGCCCGGGGCTTAACCCCGGGACTGCTTTGGAACTGGCGCGCTAGAGTGCTGGAGAGGTAAGTGGAA   |
| 14 | eri | icute | Clostr | Lachnos | Lachnospi | Lachnospira  |  | TTCTAGTGTAGCGGTGAAATGCGTAGATATTAGGAGGAACACCAGTGCGGAAGGCGGCTTACTGGACAGT   |
| 5  | a   | s     | idia   | pirales | raceae    | ceae_Genus   |  | AACTGACGTTGAGGCTCGAAAGCGTGGGGAGCAAACAGG                                  |
| A  | S   | Ba    |        |         |           |              |  | TACGTAGGGGGCAAGCGTTATCCGGATTTACTGGGTGTAAAGGGAGCGTAGACGGCAAGGCAAGTCTGATG  |
|    | V   | ct    | Firm   |         |           |              |  | TGAAAACCCAGGGCTTAACCCCTGGGACTGCATTGGAACTGTCTGGCTCGAGTGCCGGAGAGGTAAGCGGA  |
| 39 | eri | icute | Clostr | Lachnos | Lachnospi | Fusicateniba |  | ATTCCTAGTGTAGCGGTGAAATGCGTAGATATTAGGAAGAACACCAGTGCGGAAGGCGGCTTACTGGACGG  |
| 1  | a   | s     | idia   | pirales | raceae    | cter         |  | TAACTGACGTTGAGGCTCGAAAGCGTGGGGAGCAAACAGG                                 |
| A  | S   | Ba    |        |         |           |              |  | TACGTAGGGGGCAAGCGTTATCCGGATTTACTGGGTGTAAAGGGAGCGTAGACGGCCAGACAAGTCTGAAG  |
|    | V   | ct    | Firm   |         |           |              |  | TGAAAATCCAGCGCTTAACGTTGGAAGTGCTTTGGAACTGCCGGGCTAGAGTGCCAGAGGGGCAGGCGGA   |
| 04 | eri | icute | Clostr | Lachnos | Lachnospi | Lachnospira  |  | ATTCCTAGTGTAGCGGTGAAATGCGTAGATATTAGGGGGAACACCAGTGCGGAAGGCGGCCTGCTGGACTG  |
| 4  | a   | s     | idia   | pirales | raceae    | 36_group     |  | CAACTGACGTTGAGGCTCGAAGGCGTGGGGAGCAAACAGG                                 |
| A  | ct  | Firm  |        |         |           |              |  | TACGTAGGGGGCAAGCGTTATCCGGATTTACTGGGTGTAAAGGGAGCGTAGACGGCCAGACAAGTCTGAAG  |
|    | S   | eri   | icute  | Clostr  | Lachnos   | Lachnospi    |  | TGAAAATCCAGCGCTTAACGTTGGAAGTGCTTTGGAACTGCCGGGCTAGAGTGCCAGAGGGGCAGGCGGA   |
| V  | a   | s     | idia   | pirales | raceae    | 36_group     |  | ATTCCTAGTGTAGCGGTGAAATGCGTAGATATTAGGAGGAACACCAGTGCGGAAGGCGGCCTGCTGGACTG  |
|    |     |       |        |         |           |              |  | CAACTGACGTTGAGGCTCGAAGGCGTGGGGAGCAAACAGG                                 |

|    |     |       |        |         |           |             |                                                                          |
|----|-----|-------|--------|---------|-----------|-------------|--------------------------------------------------------------------------|
| 01 |     |       |        |         |           |             |                                                                          |
| 3  |     |       |        |         |           |             |                                                                          |
| A  |     |       |        |         |           |             |                                                                          |
| S  | Ba  |       |        |         |           |             | TACGTAGGGGGCAAGCGTTATCCGGATTTACTGGGTGTAAAGGGAGCGTAGACGGCTAGTCAAGTCAGAAG  |
| V  | ct  | Firm  |        |         |           |             | TGAAAGCCCAGGGCTCAACCTTGGGACTGCTTTTGAAACTGAGTAGCTAGAGTGCAGGAGAGGTAAGCGGA  |
| 31 | eri | icute | Clostr | Lachnos | Lachnospi | Lachnospira | ATTCCTAGTGTAGCGGTGAAATGCGTAGATATTAGGAGGAACACCAGTGGCGAAGGCGGCTTACTGGACTGT |
| 0  | a   | s     | idia   | pirales | raceae    | ceae_Genus  | AACTGACGTTGAGGCTCGAAAGCGTGCGGGAGCAAACAGG                                 |
| A  |     |       |        |         |           |             |                                                                          |
| S  | Ba  |       |        |         |           |             | TACGTAGGGGGCAAGCGTTATCCGGATTTACTGGGTGTAAAGGGAGCGTAGACGGCTAATCAAGTCAGAAG  |
| V  | ct  | Firm  |        |         |           |             | TGAAAACCCAGGGCTCAACCTTGGGACTGCTTTTGAAACTGAGTAGCTAGAGTGCAGGAGAGGTAAGCGGA  |
| 22 | eri | icute | Clostr | Lachnos | Lachnospi | Lachnospira | ATTCCTAGTGTAGCGGTGAAATGCGTAGATATTAGGAGGAACACCAGTGGCGAAGGCGGCTTACTGGACTGT |
| 0  | a   | s     | idia   | pirales | raceae    | ceae_Genus  | AACTGACGTTGAGGCTCGAAAGCGTGCGGGAGCAAACAGG                                 |
| A  |     |       |        |         |           |             |                                                                          |
| S  | Ba  |       |        |         |           |             | TACGTAGGGGGCAAGCGTTATCCGGATTTACTGGGTGTAAAGGGAGCGTAGACGGTTAATCAAGTCAGAAG  |
| V  | ct  | Firm  |        |         |           |             | TGAAAACCCAGGGCTCAACCTTGGGACTGCTTTTGAAACTGAGTAGCTAGAGTGCAGGAGAGGTAAGCGGA  |
| 15 | eri | icute | Clostr | Lachnos | Lachnospi | Lachnospira | ATTCCTAGTGTAGCGGTGAAATGCGTAGATATTAGGAGGAACACCAGTGGCGAAGGCGGCTTACTGGACTGT |
| 8  | a   | s     | idia   | pirales | raceae    | ceae_Genus  | AACTGACGTTGAGGCTCGAAAGCGTGCGGGAGCAAACAGG                                 |
| A  |     |       |        |         |           |             |                                                                          |
| S  | Ba  |       |        |         |           |             | TACGGAGGATGCGAGCGTTATCCGGATTTACTGGGTGTAAAGGGAGCGTAGACGGTTAATCAAGTCAGAAG  |
| V  | ct  | Firm  |        |         |           |             | TGAAAACCCAGGGCTCAACCTTGGGAGTGCTTTTGAAACTGAGTAGCTAGAGTGCAGGAGAGGTAAGCGGA  |
| 48 | eri | icute | Clostr | Lachnos | Lachnospi | Lachnospira | ATTCCTAGTGTAGCGGTGAAATGCGTAGATATTAGGAGGAACACCAGTGGCGAAGGCGGCTTCTGGTCTGC  |
| 8  | a   | s     | idia   | pirales | raceae    | ceae_Genus  | AACTGACACTGAGGCGCGAAAGCGTGCGGGAGCAAACAGG                                 |
| A  |     |       |        |         |           |             |                                                                          |
| S  | Ba  |       |        |         |           |             | TACGTAGGGGGCAAGCGTTATCCGGATTTACTGGGTGTAAAGGGAGCGTAGACGGTTAATCAAGTCAGAAG  |
| V  | ct  | Firm  |        |         |           |             | TGAAAACCCAGGGCTCAACCTTGGGAGTGCTTTTGAAACTGAGTAGCTAGAGTGCAGGAGAGGTAAGCGGA  |
| 31 | eri | icute | Clostr | Lachnos | Lachnospi | Lachnospira | ATTCCTAGTGTAGCGGTGAAATGCGTAGATATTAGGAGGAACACCAGTGGCGAAGGCGGCTTACTGGACTGT |
| 1  | a   | s     | idia   | pirales | raceae    | ceae_Genus  | AACTGACGTTGAGGCTCGAAAGCGTGCGGGAGCAAACAGG                                 |
| A  |     |       |        |         |           |             |                                                                          |
| S  | Ba  |       |        |         |           |             | TACGTAGGGGGCAAGCGTTATCCGGATTTACTGGGTGTAAAGGGAGCGTAGACGGCTAATCAAGTCAGAAG  |
| V  | ct  | Firm  |        |         |           |             | TGAAAACCCAGGGCTCAACCTTGGGAGTGCTTTTGAAACTGAGTAGCTAGAGTGCAGGAGAGGTAAGCGGA  |
| 25 | eri | icute | Clostr | Lachnos | Lachnospi | Lachnospira | ATTCCTAGTGTAGCGGTGAAATGCGTAGATATTAGGAGGAACACCAGTGGCGAAGGCGGCTTACTGGACTGT |
| 6  | a   | s     | idia   | pirales | raceae    | ceae_Genus  | AACTGACGTTGAGGCTCGAAAGCGTGCGGGAGCAAACAGG                                 |
| A  |     |       |        |         |           |             |                                                                          |
| S  | Ba  |       |        |         |           |             | TACGTAGGGGGCAAGCGTTATCCGGATTTACTGGGTGTAAAGGGAGCGTAGACGGCCAGGCAAGTCAGAAG  |
| V  | ct  | Firm  |        |         |           |             | TGAAAGCCCAGGGCTCAACCTTGGGACTGCTTTTGAAACTGCCGGGCTGGAGTGCAGGAGAGGTAAGCGGA  |
| 27 | eri | icute | Clostr | Lachnos | Lachnospi | Lachnospira | ATTCCTAGTGTAGCGGTGAAATGCGTAGATATTAGGAGGAACACCAGTGGCGAAGGCGGCTTACTGGACTGT |
| 6  | a   | s     | idia   | pirales | raceae    | ceae_Genus  | AACTGACGTTGAGGCTCGAAAGCGTGCGGGAGCAAACAGG                                 |
| A  |     |       |        |         |           |             |                                                                          |
| S  | Ba  |       |        |         |           |             | TACGTAGGGGGCAAGCGTTATCCGGATTTACTGGGTGTAAAGGGAGCGTAGACGGCCTGACAAGTCAGAAG  |
| V  | ct  | Firm  |        |         |           |             | TGAAAGCCCAGGGCTCAACCTTGGGACTGCTTTTGAAACTGCCGGGCTGGAGTGCAGGAGAGGTAAGCGGA  |
| 28 | eri | icute | Clostr | Lachnos | Lachnospi | Lachnospira | ATTCCTAGTGTAGCGGTGAAATGCGTAGATATTAGGAGGAACACCAGTGGCGAAGGCGGCTTACTGGACTGT |
| 0  | a   | s     | idia   | pirales | raceae    | ceae_Genus  | AACTGACGTTGAGGCTCGAAAGCGTGCGGGAGCAAACAGG                                 |

|    |     |       |        |         |           |              |  |                                                                          |
|----|-----|-------|--------|---------|-----------|--------------|--|--------------------------------------------------------------------------|
| A  | S   | Ba    |        |         |           |              |  | TACGTAGGGGGCAAGCGTTATCCGGATTTACTGGGTGTAAAGGGAGCGTAGACGGCCAGACAAGTCAGAAG  |
|    | V   | ct    | Firm   |         |           |              |  | TGAAAGCCCAGGGCTCAACCCTGGGACTGCTTTTGAAACTGCCGGGCTGGAGTGCAGGAGAGGTAAGCGGA  |
| 06 | eri | icute | Clostr | Lachnos | Lachnospi | Lachnospira  |  | ATTCCTAGTGTAGCGGTGAAATGCGTAGATATTAGGAGGAACACCAGTGGCGAAGGCGGCTTACTGGACTGT |
| 3  | a   | s     | idia   | pirales | raceae    | ceae_Genus   |  | AACTGACGTTGAGGCTCGAAAGCGTGGGGAGCAAACAGG                                  |
| A  | S   | Ba    |        |         |           |              |  | TACGTAGGGGGCAAGCGTTATCCGGATTTACTGGGTGTAAAGGGAGCGTAGACGGCCAGACAAGTCAGAAG  |
|    | V   | ct    | Firm   |         |           |              |  | TGAAAGCCCAGGGCTCAACTCTGGGACTGCTTTTGAAACTGCCGGGCTGGAGTGCAGGAGAGGTAAGCGGA  |
| 33 | eri | icute | Clostr | Lachnos | Lachnospi | Lachnospira  |  | ATTCCTAGTGTAGCGGTGAAATGCGTAGATATTAGGAGGAACACCAGTGGCGAAGGCGGCTTACTGGACTGT |
| 3  | a   | s     | idia   | pirales | raceae    | ceae_Genus   |  | AACTGACGTTGAGGCTCGAAAGCGTGGGGAGCAAACAGG                                  |
| A  | S   | Ba    |        |         |           |              |  | TACGTAGGGGGCAAGCGTTATCCGGATTTACTGGGTGTAAAGGGAGCGTAGACGGCAATACAAGTCGGAAG  |
|    | V   | ct    | Firm   |         |           | Lachnospira  |  | TGAAATACCCGGGCTCAACCTGGGAACTGCTTTGGAAACTGTATGGCTGGAGTGTCTGGAGAGGTAAGCGGA |
| 09 | eri | icute | Clostr | Lachnos | Lachnospi | ceae_UCG-    |  | ATTCCTAGTGTAGCGGTGAAATGCGTAGATATTAGGAGGAACACCAGTGGCGAAGGCGGCTTACTGGACAG  |
| 5  | a   | s     | idia   | pirales | raceae    | 004          |  | TAACTGACGTTGAGGCTCGAAAGCGTGGGGAGCAAACAGG                                 |
| A  | S   | Ba    |        |         |           |              |  | TACGTAGGGGGCAAGCGTTATCCGGATTTACTGGGTGTAAAGGGAGCGTAGACGGCAATACAAGTCGGAAG  |
|    | V   | ct    | Firm   |         |           | Lachnospira  |  | TGAAATACCCGGGCTTAACCTGGGAACTGCTTTGGAAACTGTATGGCTGGAGTGTCTGGAGAGGTAAGCGGA |
| 29 | eri | icute | Clostr | Lachnos | Lachnospi | ceae_UCG-    |  | ATTCCTAGTGTAGCGGTGAAATGCGTAGATATTAGGAGGAACACCAGTGGCGAAGGCGGCTTACTGGACAG  |
| 4  | a   | s     | idia   | pirales | raceae    | 004          |  | TAACTGACGTTGAGGCTCGAAAGCGTGGGGAGCAAACAGG                                 |
| A  | S   | Ba    |        |         |           |              |  | TACGTAGGGGGCAAGCGTTATCCGGATTTACTGGGTGTAAAGGGAGCGTAGACGGCATAGCAAGTCTGAAG  |
|    | V   | ct    | Firm   |         |           |              |  | TGAAAGCCCAAGGCTCAACCATGGGACTGCTTTGGAAACTGTAAAGCTAGAGTGTCTGGAGAGGTAAGCGGA |
| 08 | eri | icute | Clostr | Lachnos | Lachnospi | Lachnospira  |  | ATTCCTAGTGTAGCGGTGAAATGCGTAGATATTAGGAAGAACACCAGTGGCGAAGGCGGCTTACTGGACAG  |
| 5  | a   | s     | idia   | pirales | raceae    | ceae_Genus   |  | TAACTGACGTTGAGGCTCGAAAGCGTGGGGAGCAAACAGG                                 |
| A  | S   | Ba    |        |         |           |              |  | TACGTAGGGGGCAAGCGTTATCCGGATTTACTGGGTGTAAAGGGAGCGTAGACGGTTATGCAAGTCTGAAGT |
|    | V   | ct    | Firm   |         |           | Lachnospira  |  | GAAAGCCCCAAGGCTCAACCATGGGACTGCTTTGGAAACTGTAAAAGTGGAGTGCAGGAGAGGTAAGCGGA  |
| 31 | eri | icute | Clostr | Lachnos | Lachnospi | ceae_NK4A1   |  | ATTCCTAGTGTAGCGGTGAAATGCGTAGATATTAGGAGGAACACCAGTGGCGAAGGCGGCTTACTGGACTGT |
| 8  | a   | s     | idia   | pirales | raceae    | 36_group     |  | AACTGACGTTGAGGCTCGAAGGCGTGGGGAGCAAACAGG                                  |
| A  | S   | Ba    |        |         |           |              |  | TACGTAGGGGGCAAGCGTTATCCGGATTTACTGGGTGTAAAGGGAGCGTAGACGGCTGTGCAAGTCTGAAGT |
|    | V   | ct    | Firm   |         |           |              |  | GAAAGCCCAGGGCTCAACCCTGGGACTGCTTTGGAAACTGTGGAGCTAGAGTGTCTGGAGAGGTAAGTGGA  |
| 34 | eri | icute | Clostr | Lachnos | Lachnospi | Lachnoclostr |  | TTCTAGTGTAGCGGTGAAATGCGTAGATATTAGGAGGAACACCAGTGGCGAAGGCGGCTTACTGGACAGT   |
| 4  | a   | s     | idia   | pirales | raceae    | idium        |  | AACTGACGTTGAGGCTCGAAAGCGTGGGGAGCAAACAGG                                  |
| A  | S   | Ba    |        |         |           |              |  | TACGTAGGGGGCAAGCGTTATCCGGATTTACTGGGTGTAAAGGGAGCGTAGACGGCTGTGCAAGTCTGAAGT |
|    | V   | ct    | Firm   |         |           | Lachnospira  |  | GAAATGCCGGGGCTCAACCCCGGAAGTCTTTGGAAACTGTACAGCTAGAGTGCAGGAGGGGTGAGCGGAA   |
| 05 | eri | icute | Clostr | Lachnos | Lachnospi | ceae_NK4A1   |  | TTCTAGTGTAGCGGTGAAATGCGTAGATATTAGGAGGAACACCAGTGGCGAAGGCGGCTCACTGGACTGT   |
| 1  | a   | s     | idia   | pirales | raceae    | 36_group     |  | AACTGACGTTGAGGCTCGAAAGCGTGGGGAGCAAACAGG                                  |
| A  | ct  | Firm  |        |         |           |              |  | TACGTAGGGGGCAAGCGTTATCCGGATTTACTGGGTGTAAAGGGAGCGTAGACGGCTGTGCAAGTCTGAAGT |
|    | S   | eri   | icute  | Clostr  | Lachnos   | Lachnospi    |  | GAAATGCCGGGGCTCAACCCCGGAAGTCTTTGGAAACTGTACAGCTAGAGTGCAGGAGGGGTGAGCGGAA   |
| V  | a   | s     | idia   | pirales | raceae    | ceae_NK4A1   |  | TTCTAGTGTAGCGGTGAAATGCGTAGATATTAGGAGGAACACCGTGGCGAAGGCGGCTCACTGGACTGT    |
|    |     |       |        |         |           | 36_group     |  | AACTGACGTTGAGGCTCGAAAGCGTGGGGAGCAAACAGG                                  |

|    |     |       |        |         |           |            |  |                                                                                                                                                                                                                                                                            |
|----|-----|-------|--------|---------|-----------|------------|--|----------------------------------------------------------------------------------------------------------------------------------------------------------------------------------------------------------------------------------------------------------------------------|
| 04 |     |       |        |         |           |            |  |                                                                                                                                                                                                                                                                            |
| 9  |     |       |        |         |           |            |  |                                                                                                                                                                                                                                                                            |
| A  |     |       |        |         |           |            |  |                                                                                                                                                                                                                                                                            |
| S  | Ba  | Firm  |        |         |           |            |  |                                                                                                                                                                                                                                                                            |
| V  | ct  | icute | Clostr | Lachnos | Lachnospi | Lachnospi  |  |                                                                                                                                                                                                                                                                            |
| 02 | eri | a     | idia   | pirales | raceae    | ceae_NK4A1 |  |                                                                                                                                                                                                                                                                            |
| 3  | a   | s     |        |         |           | 36_group   |  | TACGTAGGGGGCAAGCGTTATCCGATTTACTGGGTGTAAAGGGAGCGTAGACGGCTGTGCAAGTCTGAAGT<br>GAAATGCCGGGGCCCAACCCCGGAAGTCTTTGGAAACTGTACAGCTAGAGTGCAGGAGGGGTGAGCGGAA<br>TTCCCTAGTGTAGCGGTGAAATGCGTAGATATTAGGAGGAACACCGGTGGCGAAGGCGGCTCACTGGACTGT<br>AACTGACGTTGAGGCTCGAAAGCGTGCGGGAGCAAACAGG  |
| A  |     |       |        |         |           |            |  |                                                                                                                                                                                                                                                                            |
| S  | Ba  | Firm  |        |         |           |            |  |                                                                                                                                                                                                                                                                            |
| V  | ct  | icute | Clostr | Lachnos | Lachnospi | Lachnospi  |  |                                                                                                                                                                                                                                                                            |
| 02 | eri | a     | idia   | pirales | raceae    | ceae_NK4A1 |  |                                                                                                                                                                                                                                                                            |
| 0  | a   | s     |        |         |           | 36_group   |  | TACGTAGGGGGCAAGCGTTATCCGATTTACTGGGTGTAAAGGGAGCGTAGACGGCAGCGCAAGTCTGGAG<br>TGAAATCCCATGGCTTAACCATGGAAGTCTTTGGAAACTGTGCAGCTAGAGTGCAGGAGAGGTAAGCGGA<br>ATTCCCTAGTGTAGCGGTGAAATGCGTAGATATTAGGAGGAACACCGGTGGCGAAGGCGGCTTACTGGACTGT<br>AACTGACGTTGAGGCTCGAAAGCGTGCGGGAGCAAACAGG  |
| A  |     |       |        |         |           |            |  |                                                                                                                                                                                                                                                                            |
| S  | Ba  | Firm  |        |         |           |            |  |                                                                                                                                                                                                                                                                            |
| V  | ct  | icute | Clostr | Lachnos | Lachnospi | Lachnospi  |  |                                                                                                                                                                                                                                                                            |
| 01 | eri | a     | idia   | pirales | raceae    | ceae_NK4A1 |  |                                                                                                                                                                                                                                                                            |
| 6  | a   | s     |        |         |           | 36_group   |  | TACGTAGGGGGCAAGCGTTATCCGATTTACTGGGTGTAAAGGGAGCGTAGACGGCAGCGCAAGTCTGGAG<br>TGAAATCCCATGGCTTAACCATGGAAGTCTTTGGAAACTGTGCAGCTGGAGTGCAGGAGAGGTAAGCGGA<br>ATTCCCTAGTGTAGCGGTGAAATGCGTAGATATTAGGAGGAACACCGGTGGCGAAGGCGGCTTACTGGACTGT<br>AACTGACGTTGAGGCTCGAAAGCGTGCGGGAGCAAACAGG  |
| A  |     |       |        |         |           |            |  |                                                                                                                                                                                                                                                                            |
| S  | Ba  | Firm  |        |         |           |            |  |                                                                                                                                                                                                                                                                            |
| V  | ct  | icute | Clostr | Lachnos | Lachnospi | Lachnospi  |  |                                                                                                                                                                                                                                                                            |
| 12 | eri | a     | idia   | pirales | raceae    | ceae_NK4A1 |  |                                                                                                                                                                                                                                                                            |
| 2  | a   | s     |        |         |           | 36_group   |  | TACGTAGGGGGCAAGCGTTATCCGATTTACTGGGTGTAAAGGGAGCGTAGACGGCAGCGCAAGTCTGGAG<br>TGAAATGCCGGGGCCCAACCCCGGAAGTCTTTGGAAACTGTGCAGCTCGAGTGCAGGAGAGGTAAGCGGA<br>ATTCCCTAGTGTAGCGGTGAAATGCGTAGATATTAGGAGGAACACCGGTGGCGAAGGCGGCTTACTGGACTGT<br>AACTGACGTTGAGGCTCGAAAGCGTGCGGGAGCAAACAGG  |
| A  |     |       |        |         |           |            |  |                                                                                                                                                                                                                                                                            |
| S  | Ba  | Firm  |        |         |           |            |  |                                                                                                                                                                                                                                                                            |
| V  | ct  | icute | Clostr | Lachnos | Lachnospi | Lachnospi  |  |                                                                                                                                                                                                                                                                            |
| 34 | eri | a     | idia   | pirales | raceae    | ceae_NK4A1 |  |                                                                                                                                                                                                                                                                            |
| 9  | a   | s     |        |         |           | 36_group   |  | TACGTAGGGGGCAAGCGTTATCCGATTTACTGGGTGTAAAGGGAGCGTAGACGGCAGCGCAAGTCTGGAG<br>TGAAATGCCGGGGCCCAACCCCGGAAGTCTTTGGAAACTGTGCAGCTCGAGTGCAGGAGAGGTAAGCGGA<br>ATTCCCTAGTGTAGCGGTGAAATGCGTAGATATTAGGAGGAACACCGGTGGCGAAGGCGGCTTACTGGACTGT<br>AACTGACGTTGAGGCTCGAAAGCGTGCGGGAGCAAACAGG  |
| A  |     |       |        |         |           |            |  |                                                                                                                                                                                                                                                                            |
| S  | Ba  | Firm  |        |         |           |            |  |                                                                                                                                                                                                                                                                            |
| V  | ct  | icute | Clostr | Lachnos | Lachnospi | Lachnospi  |  |                                                                                                                                                                                                                                                                            |
| 28 | eri | a     | idia   | pirales | raceae    | ceae_NK4A1 |  |                                                                                                                                                                                                                                                                            |
| 5  | a   | s     |        |         |           | 36_group   |  | TACGTAGGGGGCAAGCGTTATCCGATTTACTGGGTGTAAAGGGAGCGTAGACGGCAGCGCAAGTCTGGAG<br>TGAAATGCCGGGGCCCAACCCCGGAAGTCTTTGGAAACTGTGCGGCTCGAGTGCAGGAGAGGTAAGCGGA<br>ATTCCCTAGTGTAGCGGTGAAATGCGTAGATATTAGGAGGAACACCGGTGGCGAAGGCGGCTTACTGGACCG<br>TAACTGACGTTGAGGCTCGAAAGCGTGCGGGAGCAAACAGG  |
| A  |     |       |        |         |           |            |  |                                                                                                                                                                                                                                                                            |
| S  | Ba  | Firm  |        |         |           |            |  |                                                                                                                                                                                                                                                                            |
| V  | ct  | icute | Clostr | Lachnos | Lachnospi | Lachnospi  |  |                                                                                                                                                                                                                                                                            |
| 26 | eri | a     | idia   | pirales | raceae    | ceae_NK4A1 |  |                                                                                                                                                                                                                                                                            |
| 5  | a   | s     |        |         |           | 36_group   |  | TACGTAGGGGGCAAGCGTTATCCGATTTACTGGGTGTAAAGGGAGCGTAGACGGCAGCGCAAGTCTGGAG<br>TGAAATGCCGGGGCTCAACCCCGGAAGTCTTTGGAAACTGTGCAGCTCGAGTGCAGGAGAGGTAAGCGGA<br>ATTCCCTAGTGTAGCGGTGAAATGCGTAGATATTAGGAGGAACACCGGTGGCGAAGGCGGCTTACTGGACTGT<br>AACTGACGTTGAGGCTCGAAAGCGTGCGGGAGCAAACAGG  |
| A  |     |       |        |         |           |            |  |                                                                                                                                                                                                                                                                            |
| S  | Ba  | Firm  |        |         |           |            |  |                                                                                                                                                                                                                                                                            |
| V  | ct  | icute | Clostr | Lachnos | Lachnospi | Lachnospi  |  |                                                                                                                                                                                                                                                                            |
| 03 | eri | a     | idia   | pirales | raceae    | ceae_NK4A1 |  |                                                                                                                                                                                                                                                                            |
| 2  | a   | s     |        |         |           | 36_group   |  | TACGTAGGGGGCAAGCGTTATCCGATTTACTGGGTGTAAAGGGAGCGTAGACGGCCAGGCAAGTCTGGAG<br>TGAAAGCCCGGGGCTCAACCCCGGGAAGTCTTTGGAAACTGTAGGGCTGGAGTGCAGGAGGGGTAAGCGGA<br>ATTCCCTAGTGTAGCGGTGAAATGCGTAGATATTAGGAGGAACACCGGTGGCGAAGGCGGCTTACTGGACTG<br>CAACTGACGTTGAGGCTCGAAGGCGTGCGGGAGCAAACAGG |

|    |     |       |        |         |           |             |          |                                                                          |
|----|-----|-------|--------|---------|-----------|-------------|----------|--------------------------------------------------------------------------|
| A  | S   | Ba    |        |         |           |             |          | TACGTAGGGGGCAAGCGTTATCCGGATTTACTGGGTGTAAAGGGAGCGCAGACGGCTGTGCAAGTCTGGAG  |
|    | V   | ct    | Firm   |         |           |             |          | TGAAAGGCGGGGGCCCAACCCCGGACTGCTCTGGAAGTGTAAAGCTGGAGTGCAGGAGAGGTAAAGCGG    |
| 04 | eri | icute | Clostr | Lachnos | Lachnospi | Lachnospira |          | AATTCCTAGTGTAGCGGTGAAATGCGTAGATATTAGGAGGAACACCAGTGGCGAAGGCGGCTTACTGGACT  |
| 0  | a   | s     | idia   | pirales | raceae    | ceae_NK4A1  | 36_group | GCAACTGACGTTGAGGCTCGAAAGCGTGGGGAGCAAACAGG                                |
| A  | S   | Ba    |        |         |           |             |          | TACGTAGGGGGCAAGCGTTATCCGGAATTACTGGGTGTAAAGGGAGCGTAGACGGTGATGTAAGTCTGGAG  |
|    | V   | ct    | Firm   |         |           |             |          | TGAAAGGCGGGGGCCCAACCCCGGACTGCTCTGGAAGTATGTGACTGGAGTGCAGGAGAGGTGAGCGGA    |
| 42 | eri | icute | Clostr | Lachnos | Lachnospi | Lachnospira |          | ATTCCTAGTGTAGCGGTGAAATGCGTAGATATTAGGAGGAACACCAGTGGCGAAGGCGGCTCACTGGACTG  |
| 6  | a   | s     | idia   | pirales | raceae    | ceae_NK4A1  | 36_group | TAACTGACGTTGAGGCTCGAAAGCGTGGGGAGCAAACAGG                                 |
| A  | S   | Ba    |        |         |           |             |          | TACGTAGGGGGCAAGCGTTATCCGGATTTACTGGGTGTAAAGGGAGCGTAGACGGTTGCGCAAGTCTGGAGT |
|    | V   | ct    | Firm   |         |           |             |          | GAAAGGCGGGGGCCCAACCCCGGACTGCTCTGGAAGTGTGTAAGTGGAGTGCAGGAGAGGTAAGTGGAA    |
| 16 | eri | icute | Clostr | Lachnos | Lachnospi | Lachnospira |          | ATTCCTAGTGTAGCGGTGAAATGCGTAGATATTAGGAGGAACACCAGTGGCGAAGGCGGCTTACTGGACTGT |
| 6  | a   | s     | idia   | pirales | raceae    | ceae_NK4A1  | 36_group | AAGTACGTTGAGGCTCGAAAGCGTGGGGAGCAAACAGG                                   |
| A  | S   | Ba    |        |         |           |             |          | TACGTAGGGGGCAAGCGTTATCCGGATTTACTGGGTGTAAAGGGAGCGTAGACGGTTGCGCAAGTCTGGAGT |
|    | V   | ct    | Firm   |         |           |             |          | GAAAGGCGGGGGCTCAACCCCGGACTGCTCTGGAAGTGTGTAAGTGGAGTGCAGGAGAGGTAAGTGGAA    |
| 17 | eri | icute | Clostr | Lachnos | Lachnospi | Lachnospira |          | TTCCTAGTGTAGCGGTGAAATGCGTAGATATTAGGAGGAACACCAGTGGCGAAGGCGGCTTACTGGACTGTA |
| 1  | a   | s     | idia   | pirales | raceae    | ceae_NK4A1  | 36_group | ACTGACGTTGAGGCTCGAAAGCGTGGGGAGCAAACAGG                                   |
| A  | S   | Ba    |        |         |           |             |          | TACGTAGGGGGCAAGCGTTATCCGGATTTACTGGGTGTAAAGGGAGCGTAGACGGTTGCGCAAGTCTGGAGT |
|    | V   | ct    | Firm   |         |           |             |          | GAAAGGCGGGGGCTCACCCCGGACTGCTCTGGAAGTGTGTAAGTGGAGTGCAGGAGAGGTAAGTGGAA     |
| 38 | eri | icute | Clostr | Lachnos | Lachnospi | Lachnospira |          | TTCCTAGTGTAGCGGTGAAATGCGTAGATATTAGGAGGAACACCAGTGGCGAAGGCGGCTTACTGGACTGTA |
| 9  | a   | s     | idia   | pirales | raceae    | ceae_NK4A1  | 36_group | ACTGACGTTGAGGCTCGAAAGCGTGGGGAGCAAACAGG                                   |
| A  | S   | Ba    |        |         |           |             |          | TACGTAGGGGGCAAGCGTTATCCGGATTTACTGGGTGTAAAGGGAGCGTAGACGGTTGTGCAAGTCTGGAGT |
|    | V   | ct    | Firm   |         |           |             |          | GAAAGGCGGGGGCCCAACCCCGGACTGCTTTGGAAGTGTATAACTGGAGTGCAGGAGAGGTAAGTGGAA    |
| 10 | eri | icute | Clostr | Lachnos | Lachnospi | Lachnospira |          | TTCCTAGTGTAGCGGTGAAATGCGTAGATATTAGGAGGAACACCAGTGGCGAAGGCGGCTTACTGGACTGTA |
| 3  | a   | s     | idia   | pirales | raceae    | ceae_NK4A1  | 36_group | ACTGACGTTGAGGCTCGAAAGCGTGGGGAGCAAACAGG                                   |
| A  | S   | Ba    |        |         |           |             |          | TACGTAGGGGGCAAGCGTTATCCGGATTTACTGGGTGTAAAGGGAGCGTAGACGGTTACGCAAGTCTGAAGT |
|    | V   | ct    | Firm   |         |           |             |          | GAAAGGCGGGGGCCCAACCCCGGACTGCTTTGGAAGTGTGAAAGTGGAGTGCAGGAGAGGTAAGTGGAA    |
| 18 | eri | icute | Clostr | Lachnos | Lachnospi | Lachnospira |          | ATTCCTAGTGTAGCGGTGAAATGCGTAGATATTAGGAGGAACACCAGTGGCGAAGGCGGCTTACTGGACTGT |
| 0  | a   | s     | idia   | pirales | raceae    | ceae_NK4A1  | 36_group | AAGTACGTTGAGGCTCGAAAGCGTGGGGAGCAAACAGG                                   |
| A  | S   | Ba    |        |         |           |             |          | TACGTAGGGGGCAAGCGTTATCCGGATTTACTGGGTGTAAAGGGAGCGTAGACGGTTACGCAAGTCTGGAGT |
|    | V   | ct    | Firm   |         |           |             |          | GAAAGGCGGGGGCCCAACCCCGGACTGCTTTGGAAGTGTGAAAGTGGAGTGCAGGAGAGGTAAGTGGAA    |
| 22 | eri | icute | Clostr | Lachnos | Lachnospi | Lachnospira |          | ATTCCTAGTGTAGCGGTGAAATGCGTAGATATTAGGAGGAACACCAGTGGCGAAGGCGGCTTACTGGACTGT |
| 8  | a   | s     | idia   | pirales | raceae    | ceae_NK4A1  | 36_group | AAGTACGTTGAGGCTCGAAAGCGTGGGGAGCAAACAGG                                   |
| A  | ct  | Ba    |        |         |           |             |          | TACGTAGGGGGCAAGCGTTATCCGGATTTACTGGGTGTAAAGGGAGCGTAGACGGTTACGCAAGTCTGGAGT |
|    | S   | eri   | Firm   |         |           |             |          | GAAAGGCGGGGGCCCAACCCCGGACTGCTTTGGAAGTGTATAACTGGAGTGCAGGAGAGGTAAGTGGAA    |
| V  | a   | s     | Clostr | Lachnos | Lachnospi | Lachnospira |          | TTCCTAGTGTAGCGGTGAAATGCGTAGATATTAGGAGGAACACCAGTGGCGAAGGCGGCTTACTGGACTGTA |
|    |     |       | idia   | pirales | raceae    | ceae_NK4A1  | 36_group | ACTGACGTTGAGGCTCGAAAGCGTGGGGAGCAAACAGG                                   |

|    |     |       |        |         |           |             |                                                                          |
|----|-----|-------|--------|---------|-----------|-------------|--------------------------------------------------------------------------|
| 13 |     |       |        |         |           |             |                                                                          |
| 5  |     |       |        |         |           |             |                                                                          |
| A  |     |       |        |         |           |             |                                                                          |
| S  | Ba  | Firm  |        |         |           |             |                                                                          |
| V  | ct  | icute | Clostr | Lachnos | Lachnospi | Lachnospira | TACGTAGGGGGCAAGCGTTATCCGGATTTACTGGGTGTAAAGGGAGCGTAGACGGCGATGCAAGTCTGAAG  |
| 02 | eri | s     | idia   | pirales | raceae    | ceae_NK4A1  | TGAAAGGCGGGGGCCCCAACCCCGGACTGCTTTGGGAACTGTATGGCTGGAGTGCAGGAGAGGTAAGTGG   |
| 9  | a   |       |        |         |           | 36_group    | ATTCCTAGTGTAGCGGTGAAATGCGTAGATATTAGGAGGAACACCAGTGGCGAAGGCGGCTTACTGGACTGT |
| A  |     |       |        |         |           |             | AACTGACGTTGAGGCTCGAAAGCGTGCGGGAGCAAACAGG                                 |
| S  | Ba  | Firm  |        |         |           |             |                                                                          |
| V  | ct  | icute | Clostr | Lachnos | Lachnospi | Lachnospira | TACGTAGGGGGCAAGCGTTATCCGGAATCACTGGGTGTAAAGGGAGCGTAGACGGCTGTGCAAGCCTGAAG  |
| 16 | eri | s     | idia   | pirales | raceae    | ceae_NK4A1  | TGAAAGGCGGGGGCCCCAACCCCGGACTGCTTTGGGAACTGTACGGCTGGAGTGCAGGAGAGGTAAGTGG   |
| 9  | a   |       |        |         |           | 36_group    | ATTCCTAGTGTAGCGGTGAAATGCGTAGATATTAGGAGGAACACCAGTGGCGAAGGCGGCTTACTGGACTGT |
| A  |     |       |        |         |           |             | AACTGACGTTGAGGCTCGAAAGCGTGCGGGAGCAAACAGG                                 |
| S  | Ba  | Firm  |        |         |           |             |                                                                          |
| V  | ct  | icute | Clostr | Lachnos | Lachnospi | Lachnospira | TACGTAGGGGGCAAGCGTTATCCGGAATCACTGGGTGTAAAGGGAGCGTAGACGGCTGAGCAAGCCTGAAG  |
| 15 | eri | s     | idia   | pirales | raceae    | ceae_NK4A1  | TGAAAGGCGGGGGCCCCAACCCCGGACTGCTTTGGGAACTGTACGGCTGGAGTGCAGGAGAGGTAAGTGG   |
| 4  | a   |       |        |         |           | 36_group    | ATTCCTAGTGTAGCGGTGAAATGCGTAGATATTAGGAGGAACACCAGTGGCGAAGGCGGCTTACTGGACTGT |
| A  |     |       |        |         |           |             | AACTGACGTTGAGGCTCGAAAGCGTGCGGGAGCAAACAGG                                 |
| S  | Ba  | Firm  |        |         |           |             |                                                                          |
| V  | ct  | icute | Clostr | Lachnos | Lachnospi | Lachnospira | TACGTAGGGGGCAAGCGTTATCCGGAATCACTGGGTGTAAAGGGAGCGTAGACGGCTGTGCAAGCCTGAAG  |
| 19 | eri | s     | idia   | pirales | raceae    | ceae_NK4A1  | TGAAAGGCGGGGGCCCCAACCCCGGACTGCTTTGGGAACTGTACGGCTGGAGTGCAGGAGAGGTAAGTGG   |
| 5  | a   |       |        |         |           | 36_group    | ATTCCTAGTGTAGCGGTGAAATGCGTAGATATTAGGAGGAACACCAGTGGCGAAGGCGGCTTACTGGACTGT |
| A  |     |       |        |         |           |             | AACTGACGTTGAGGCTCGAAAGCGTGCGGGAGCAAACAGG                                 |
| S  | Ba  | Firm  |        |         |           |             |                                                                          |
| V  | ct  | icute | Clostr | Lachnos | Lachnospi | Lachnospira | TACGTAGGGGGCAAGCGTTATCCGGAATCACTGGGTGTAAAGGGAGCGTAGACGGCTGAGCAAGCCTGAAG  |
| 09 | eri | s     | idia   | pirales | raceae    | ceae_NK4A1  | TGAAAGGCGGGGGCCCCAACCCCGGACTGCTTTGGGAACTGTACGGCTGGAGTGCAGGAGAGGTAAGTGG   |
| 4  | a   |       |        |         |           | 36_group    | ATTCCTAGTGTAGCGGTGAAATGCGTAGATATTAGGAGGAACACCAGTGGCGAAGGCGGCTTACTGGACTGT |
| A  |     |       |        |         |           |             | AACTGACGTTGAGGCTCGAAAGCGTGCGGGAGCAAACAGG                                 |
| S  | Ba  | Firm  |        |         |           |             |                                                                          |
| V  | ct  | icute | Clostr | Lachnos | Lachnospi | Lachnospira | TACGTAGGGGGCAAGCGTTATCCGGAATTACTGGGTGTAAAGGGAGCGTAGACGGCTGTGCAAGTCTGGAG  |
| 01 | eri | s     | idia   | pirales | raceae    | ceae_NK4A1  | TGAAAGGCGGGGGCCCCAACCCCGGACTGCTCTGGGAACTGTATGGCTGGAGTGCAGGAGAGGTAAGCGGA  |
| 7  | a   |       |        |         |           | 36_group    | ATTCCTAGTGTAGCGGTGAAATGCGTAGATATTAGGAGGAACACCAGTGGCGAAGGCGGCTTACTGGACTGT |
| A  |     |       |        |         |           |             | AACTGACGTTGAGGCTCGAAAGCGTGCGGGAGCAAACAGG                                 |
| S  | Ba  | Firm  |        |         |           |             |                                                                          |
| V  | ct  | icute | Clostr | Lachnos | Lachnospi | Lachnospira | TACGTAGGGGGCAAGCGTTATCCGGATTTACTGGGTGTAAAGGGAGCGTAGACGGCGGGGCAAGTCTGGAG  |
| 13 | eri | s     | idia   | pirales | raceae    | ceae_NK4A1  | TGAAAGGCCGGGGCCCCAACCCCGGGACCGCTCTGGGAACTGCCCGGCTGGAGTGCGGGAGAGGTAAGCGG  |
| 1  | a   |       |        |         |           | 36_group    | AATTCCTAGTGTAGCGGTGAAATGCGTAGATATTAGGAGGAACACCAGCGGCGAAGGCGGCTTACTGGACC  |
| A  |     |       |        |         |           |             | GTGACTGACGTTGAGGCTCGAAAGCGTGCGGGAGCAAACAGG                               |
| S  | Ba  | Firm  |        |         |           |             |                                                                          |
| V  | ct  | icute | Clostr | Lachnos | Lachnospi | Lachnospira | TACGTAGGGGGCAAGCGTTATCCGGATTTACTGGGTGTAAAGGGAGCGTAGACGGCGAGACAAGTCTGGAG  |
| 26 | eri | s     | idia   | pirales | raceae    | ceae_NK4A1  | TGAAAGGCCGGGGCCCCAACCCCGGGACTGCTCTGGGAACTGCCTGGCTGGAGTACAGGAGAGGTAAGTGG  |
| 1  | a   |       |        |         |           | 36_group    | ATTCCTAGTGTAGCGGTGAAATGCGTAGATATTAGGAGGAACACCAGTGGCGAAGGCGGCTTACTGGACTGT |
|    |     |       |        |         |           |             | AACTGACGTTGAGGCTCGAAAGCGTGCGGGAGCAAACAGG                                 |

|    |     |       |        |         |           |            |          |                                                                          |
|----|-----|-------|--------|---------|-----------|------------|----------|--------------------------------------------------------------------------|
| A  | S   | Ba    |        |         |           |            |          | TACGTAGGGGGCAAGCGTTATCCGGATTTACTGGGTGTAAAGGGAGCGTAGACGGCAGGGCAAGTCTGGAG  |
|    | V   | ct    | Firm   |         |           |            |          | TGAAAGGCGGGGCTCAACCCCGGACTGCTCTGGAACTGCCAGGCTGGAGTGCAGGAGAGGTAAGTGGA     |
| 14 | eri | icute | Clostr | Lachnos | Lachnospi | Lachnospi  |          | ATTCTAGTGTAGCGGTGAAATGCGTAGATATTAGGAGGAACACCAGTGGCGAAGGCGGCTTACTGGACTGT  |
| 1  | a   | s     | idia   | pirales | raceae    | ceae_NK4A1 | 36_group | AACTGACGTTGAGGCTCGAAAGCGTGGGGAGCAAACAGG                                  |
| A  | S   | Ba    |        |         |           |            |          | TACGTAGGGGGCAAGCGTTATCCGGATTTACTGGGTGTAAAGGGAGCGTAGACGGCAGGGCAAGTCTGGAG  |
|    | V   | ct    | Firm   |         |           |            |          | TGAAAGGCGGGGCCCCAACCCCTGGACTGCTCTGGAACTGTCCGGCTGGAGTGCAGGAGAGGTAAGTGGA   |
| 03 | eri | icute | Clostr | Lachnos | Lachnospi | Lachnospi  |          | ATTCTAGTGTAGCGGTGAAATGCGTAGATATTAGGAGGAACACCAGTGGCGAAGGCGGCTTACTGGACTGT  |
| 0  | a   | s     | idia   | pirales | raceae    | ceae_NK4A1 | 36_group | AACTGACGTTGAGGCTCGAAAGCGTGGGGAGCAAACAGG                                  |
| A  | S   | Ba    |        |         |           |            |          | TACGTAGGGGGCGAGCGTTATCCGGAATTACTGGGTGTAAAGGGAGCGTAGACGGCGAGGTAAGCCTGAAG  |
|    | V   | ct    | Firm   |         |           |            |          | TGGAAGCCCGCGGCCAACCGCGGAAGTCTTTGGGAACTGTTTGTCTGGAGTATGGGAGGGGTAAGCGGA    |
| 18 | eri | icute | Clostr | Lachnos | Lachnospi | Lachnospi  |          | ATTCTGGTGTAGCGGTGAAATGCGTAGATATCAGGAGGAACACCAGTGGCGAAGGCGGCTTACTGGACCA   |
| 3  | a   | s     | idia   | pirales | raceae    | ceae_Genus |          | TAACTGACGTTGAGGCTCGAAAGCGTGGGGAGCGAACAGG                                 |
| A  | S   | Ba    |        |         |           |            |          | TACGTAGGGGGCAAGCGTTATCCGGAATTACTGGGTGTAAAGGGAGCGTAGACGGCAATGCAAGTCCGGAG  |
|    | V   | ct    | Firm   |         |           |            |          | TGGAATGCGGCAGCTCAACTGCCGAAGTCTCTGGAACTGTATGGCTTGAGTGCAGGAGGGGTAAGCGGA    |
| 26 | eri | icute | Clostr | Lachnos | Lachnospi | Lachnospi  |          | ATTCTGGTGTAGCGGTGAAATGCGTAGATATCAGGAGGAACACCAGTGGCGAAGGCGGCTTACTGGACTGT  |
| 7  | a   | s     | idia   | pirales | raceae    | ceae_Genus |          | AACTGACGTTGAGGCTCGAAAGCGTGGGGAGCAAACAGG                                  |
| A  | S   | Ba    |        |         |           |            |          | TACGTAGGGGGCAAGCGTTATCCGGATTTACTGGGTGTAAAGGGAGCGTAGACGGCAGCGCAAGCCTGGAG  |
|    | V   | ct    | Firm   |         |           |            |          | TGAAAGGATGGGGCCCCAACCCCATGACTGCTCTGGGAACTGTGCGGCTAGAGTGCCGGAGGGGTAAGCGGA |
| 17 | eri | icute | Clostr | Lachnos | Lachnospi | Lachnospi  |          | ATTCTAGTGTAGCGGTGAAATGCGTAGATATTAGGAGGAACACCAGTGGCGAAGGCGGCTTACTGGACGG   |
| 0  | a   | s     | idia   | pirales | raceae    | ceae_Genus |          | TAACTGACGTTGAGGCTCGAAAGCGTGGGGAGCAAACAGG                                 |
| A  | S   | Ba    |        |         |           |            |          | TACGTAGGGGGCGAGCGTTATCCGGATTTACTGGGTGTAAAGGGAGCGTAGACGGCCATGCAAGCTCGGTGT |
|    | V   | ct    | Firm   |         |           |            |          | GAAAGGTGCGGGCACAACCCGCAGACTGCACTGAGAACTGTATGGCTGGAGTGCCGGAGGGGCAGGCGGA   |
| 08 | eri | icute | Clostr | Lachnos | Lachnospi | Lachnospi  |          | ATTCTGGTGTAGCGGTGAAATGCGTAGATATCAGGAGGAACACCAGTGGCGAAGGCGGCCTGCTGGACGG   |
| 9  | a   | s     | idia   | pirales | raceae    | ceae_Genus |          | CGACTGACGTTGAGGCTCGAAAGCGTGGGGAGCGAACAGG                                 |
| A  | S   | Ba    |        |         |           |            |          | TACGTAGGGGGCAAGCGTTATCCGGATTTACTGGGTGTAAAGGGGGCGCAGACGGCCATGGCAAGCCCGGT  |
|    | V   | ct    | Firm   |         |           |            |          | GTGAAAGGCAGGGGCATAACCCCTGGACTGCACTGGGAACTGTCAGGCTGGAGTGCCGGAGGGGTAAGCG   |
| 05 | eri | icute | Clostr | Lachnos | Lachnospi | Lachnospi  |          | GAATTCTGGTGTAGCGGTGAAATGCGTAGATATCAGGAGGAACACCGGCGGCGAAGGCGGCTTACTGGAC   |
| 0  | a   | s     | idia   | pirales | raceae    | ceae_Genus |          | GGCAACTGACGTTGAGGCCCGAAAGCGTGGGGAGCGAACAGG                               |
| A  | S   | Ba    |        |         |           |            |          | TACGTAGGGGGCGAGCGTTATCCGGATTTACTGGGTGTAAAGGGGGCGCAGACGGCCATGGCAAGCCCGGT  |
|    | V   | ct    | Firm   |         |           |            |          | GTGAAAGGTGCGGGCACAACCCGCAGACTGCACTGGTAAGTGCCTGGCTGGAGTGCCGGAGGGGTAAGCGG  |
| 17 | eri | icute | Clostr | Lachnos | Lachnospi | Lachnospi  |          | AATTCTGGTGTAGCGGTGAAATGCGTAGATATCAGGAGGAACACCAGTGGCGAAGGCGGCTTACTGGACG   |
| 7  | a   | s     | idia   | pirales | raceae    | ceae_Genus |          | GCAACTGACGTTGAGGCCCGAAAGCGTGGGGAGCGAACAGG                                |
| A  | ct  | Firm  |        |         |           |            |          | TACGTAGGGGGCGAGCGTTATCCGGATTTACTGGGTGTAAAGGGGGCGCAGACGGCCATGGCAAGCCCGGT  |
|    | S   | eri   | icute  | Clostr  | Lachnos   | Lachnospi  |          | GTGAAAGGTGCGGGCACAACCCGCAGACTGCACTGGTAAGTGTCTGGCTGGAGTGCCGGAGGGGTAAGCGG  |
| V  | a   | s     | idia   | pirales | raceae    | ceae_Genus |          | AATTCTGGTGTAGCGGTGAAATGCGTAGATATCAGGAGGAACACCAGTGGCGAAGGCGGCTTACTGGACG   |
|    |     |       |        |         |           |            |          | GCAACTGACGTTGAGGCCCGAAAGCGTGGGGAGCGAACAGG                                |

Table S2. PQ metadata.

| Mous<br>eID | Sex | Genot<br>ype | Treat<br>ment  | SeqI<br>D | Barcode | Time<br>point     | FC.train_basel<br>ine_motion | FC.train_fr<br>z_tone1 | FC.train_fr<br>z_tone2 | FC.context_t<br>otalfrzing | GS.S<br>core | OF1.T<br>otDist | OF2.T<br>otDist        | OF3.T<br>otDist | YM.Pct.S<br>pon.Alt |
|-------------|-----|--------------|----------------|-----------|---------|-------------------|------------------------------|------------------------|------------------------|----------------------------|--------------|-----------------|------------------------|-----------------|---------------------|
| m01         | m01 | M            | A53T-<br>L444P | P         | T3-1    | CTATATTA<br>TCCG  | t3                           | 121.75                 | 26.78                  | 75.22                      | 93.36        | 2.1             | -                      | 1117.93532.314  | 57.1429             |
| m02         | m02 | M            | A53T           | S         | T3-2    | CAAACGTG<br>CGTTG | t3                           | 139.75                 | 13.78                  | 64.56                      | 73.98        | 1.7             | -                      | 202.998215.412  | 80                  |
| m03         | m03 | M            | A53T-<br>L444P | S         | T3-3    | CTGACAC<br>GAAT A | t3                           | 140.5                  | 10.67                  | 46                         | 82.44        | 1.3             | -                      | 349.655 399.71  | 50                  |
| m04         | m04 | M            | A53T-<br>L444P | P         | T3-4    | AGCAGTG<br>CGGTG  | t3                           | 180.47                 | 0                      | 33.67                      | 66.13        | 1               | -                      | 1108.7 933.338  | 55                  |
| m05         | m05 | M            | A53T           | P         | T3-5    | GTTGGAC<br>GAAGG  | t3                           | 67.28                  | 38.44                  | 44.33                      | 80.41        | 1               | 852.929960.736563.017  |                 | 50                  |
| m06         | m06 | M            | A53T           | S         | T3-6    | CAGGAAC<br>CAGGA  | t3                           | 163.99                 | 0                      | 43.67                      | 88.58        | 1.7             | 1504.351109.91739.297  | 61.5385         |                     |
| m07         | m07 | M            | A53T           | P         | T3-7    | CAAAGGA<br>GCCCCG | t3                           | 199.31                 | 0                      | 10.78                      | 65.59        | 0.6             | 1156.42 980.74 812.412 | 56.5217         |                     |
| m08         | m08 | M            | A53T-<br>L444P | S         | T3-8    | GAATCTG<br>ACAAC  | t3                           | 240.31                 | 0                      | 43.44                      | 65.28        | 1               | 1602.871089.14782.335  | 47.8261         |                     |
| m09         | m09 | M            | A53T-<br>L444P | P         | T3-9    | CTCATCA<br>TGTTT  | t3                           | 69.92                  | 40.22                  | 92.22                      | 91.2         | 0.9             | 1241.981151.33789.642  | 50              |                     |
| m10         | m10 | M            | A53T           | S         | T3-10   | TTATCCA<br>GTCCT  | t3                           | 189.71                 | 0                      | 45.78                      | 86.8         | 1               | 1733.361351.121489.86  | 65              |                     |
| m11         | m11 | M            | A53T-<br>L444P | S         | T3-11   | GAGTCTT<br>GGTAA  | t3                           | 189.62                 | 0                      | 64.11                      | 62.99        | 1               | 1067.79 677.85 941.056 | 54.5455         |                     |
| m12         | m12 | M            | A53T-<br>L444P | P         | T3-12   | CATTTAC<br>ATCAC  | t3                           | 155.47                 | 32.33                  | 49.67                      | 96.07        | 1.1             | 1013.65813.405608.691  | 72.2222         |                     |
| m13         | m13 | M            | A53T           | S         | T3-13   | TTCTTAAC<br>GCCT  | t3                           | 114.08                 | 18.22                  | 89.67                      | 57.1         | 0.9             | 2270.812133.111034.78  | 46.6667         |                     |
| m14         | m14 | M            | A53T           | P         | T3-14   | AGTAGTT<br>TCCTT  | t3                           | 185.89                 | 3.67                   | 42                         | 60.77        | 1.2             | 905.01 630.722589.561  | 35.7143         |                     |
| m15         | m15 | M            | A53T-<br>L444P | S         | T3-15   | GACCCGT<br>TTCGC  | t3                           | 174.97                 | 23.56                  | 33.44                      | 79.31        | 1               | 938.8441542.261238.26  | 75              |                     |
| m16         | m16 | M            | A53T-<br>L444P | P         | T3-16   | ATTGCCTT<br>GATT  | t3                           | 43.08                  | 41.33                  | 59.89                      | 85.52        | 1.1             | 331.979284.807285.339  | 50              |                     |
| m17         | m17 | M            | A53T-<br>L444P | S         | T3-17   | TTAGGAT<br>TCTAT  | t3                           | 183.22                 | 4.78                   | 27.56                      | 69.74        | 1               | 2838.361959.58 1482.3  | 50              |                     |
| m18         | m18 | M            | A53T           | P         | T3-18   | GTTTATCT<br>TAAG  | t3                           | 105.87                 | 0                      | 0                          | 12.82        | 1               | 1844.261626.561302.19  | 41.6667         |                     |

|     |     |   |                |   |       |                  |    |        |       |       |       |     |                        |         |
|-----|-----|---|----------------|---|-------|------------------|----|--------|-------|-------|-------|-----|------------------------|---------|
| m19 | m19 | M | A53T           | P | T3-19 | CAGTCTA<br>GTACG | t3 | 87.16  | 70.11 | 93.56 | 67.43 | 0.8 | 1443.081039.73763.291  | 36.3636 |
| m20 | m20 | M | A53T-<br>L444P | P | T3-20 | GTGGGAC<br>TGCGC | t3 | 174.71 | 0     | 11    | 71.89 | 0.9 | 1806.961674.511503.08  | 58.8235 |
| m21 | m21 | M | A53T-<br>L444P | S | T3-21 | CTCCCGA<br>GCTCC | t3 | 101.12 | 41.89 | 33.78 | 92.38 | 0.8 | 1789.061732.73902.119  | 59.0909 |
| m22 | m22 | F | A53T-<br>L444P | P | T3-22 | CAGATCC<br>CAACC | t3 | 79.44  | 85.67 | 67.33 | -     | 0.9 | 1039.29608.882340.988  | 69.2308 |
| m23 | m23 | F | A53T           | P | T3-23 | TGACTGC<br>GTTAG | t3 | 148.06 | 13.89 | 65.11 | -     | 0.9 | 955.228899.387232.513  | 50      |
| m24 | m24 | F | A53T           | S | T3-24 | GAGCCCA<br>AAGAG | t3 | 137.45 | 0     | 36.22 | -     | 1   | 1540.7 996.2561133.99  | 64.5161 |
| m25 | m25 | F | A53T-<br>L444P | S | T3-25 | CAACGAA<br>CCATC | t3 | 131.04 | 31.33 | 42.78 | -     | 0.9 | 1002.37842.106722.568  | 56.25   |
| m26 | m26 | F | A53T-<br>L444P | P | T3-26 | GTTCGCC<br>GCATC | t3 | NA     | NA    | NA    |       | NA  | NA NA NA               | NA      |
| m27 | m27 | F | A53T           | P | T3-27 | GTTCGAG<br>TGAAT | t3 | 244.95 | 0     | 6.67  | 43.81 | 0.7 | 2647.242022.931655.36  | 51.7241 |
| m28 | m28 | F | A53T           | S | T3-28 | CGGCCTA<br>AGTTC | t3 | 163.57 | 0     | 19.44 | 25.3  | 0.9 | 1442.621094.92424.456  | 58.8235 |
| m29 | m29 | F | A53T-<br>L444P | S | T3-29 | TAGACTT<br>CAGAG | t3 | 270.83 | 0     | 63.44 | 70.76 | 0.8 | 1676.791012.16 878.96  | 39.1304 |
| m30 | m30 | F | A53T-<br>L444P | S | T3-30 | GATAGCA<br>CTCGT | t3 | 76.57  | 12.89 | 93.44 | 98.66 | 0.7 | 711.639454.562272.101  | 14.2857 |
| m31 | m31 | F | A53T           | P | T3-31 | ACGTTAA<br>TATTC | t3 | 186.25 | 0     | 21.33 | 79.8  | 1.1 | 815.788579.348377.979  | 66.6667 |
| m32 | m32 | F | A53T           | S | T3-32 | CCATGTG<br>GCTCC | t3 | 178.32 | 0     | 54.78 | 48.44 | 0.7 | 1883.721835.541900.51  | 75      |
| m33 | m33 | F | A53T-<br>L444P | P | T3-33 | ACACGTT<br>TGGGT | t3 | 224.41 | 0     | 9.44  | 64.79 | 0.7 | 2064.45 1927 1213.36   | 66.6667 |
| m34 | m34 | F | A53T           | P | T3-34 | AGACTAT<br>TTCAT | t3 | 112.39 | 13.11 | 57.56 | 78.23 | 1   | 1027.68643.202630.387  | 52.381  |
| m35 | m35 | F | A53T           | S | T3-35 | AGTCCGA<br>GTTGT | t3 | 194.07 | 0     | 52.22 | 59.49 | 0.9 | 1490.911165.871066.95  | 58.8235 |
| m36 | m36 | F | A53T           | P | T3-36 | GCTGAGC<br>CTTIG | t3 | 251.28 | 0     | 55.78 | 64.69 | 1.2 | 1071.27 958.29 914.974 | 52.1739 |

**Table S3.** DSS taxon.

|                                       | Kin<br>gdo<br>m | Phylum           | Class           | Order                  | Family                  | Genus                                 |
|---------------------------------------|-----------------|------------------|-----------------|------------------------|-------------------------|---------------------------------------|
| raber-<br>2020-<br>dss_<br>ASV0<br>01 | Bact<br>eria    | Bacteroi<br>dota | Bacteroidi<br>a | Bacteroidales          | Muribaculacea<br>e      | NA                                    |
| raber-<br>2020-<br>dss_<br>ASV0<br>02 | Bact<br>eria    | Bacteroi<br>dota | Bacteroidi<br>a | Bacteroidales          | Muribaculacea<br>e      | NA                                    |
| raber-<br>2020-<br>dss_<br>ASV0<br>03 | Bact<br>eria    | Firmicu<br>tes   | Bacilli         | Erysipelotrich<br>ales | Erysipelotricha<br>ceae | Turicibacter                          |
| raber-<br>2020-<br>dss_<br>ASV0<br>04 | Bact<br>eria    | Firmicu<br>tes   | Bacilli         | Lactobacillale<br>s    | Lactobacillacea<br>e    | Lactobacillus                         |
| raber-<br>2020-<br>dss_<br>ASV0<br>05 | Bact<br>eria    | Firmicu<br>tes   | Clostridia      | Lachnospirale<br>s     | Lachnospiracea<br>e     | NA                                    |
| raber-<br>2020-<br>dss_<br>ASV0<br>06 | Bact<br>eria    | Bacteroi<br>dota | Bacteroidi<br>a | Bacteroidales          | Muribaculacea<br>e      | NA                                    |
| raber-<br>2020-<br>dss_<br>ASV0<br>07 | Bact<br>eria    | Firmicu<br>tes   | Clostridia      | Lachnospirale<br>s     | Lachnospiracea<br>e     | Lachnospiraceae<br>_NK4A136_grou<br>p |

|                                       |              |                  |                 |                    |                     |                                       |
|---------------------------------------|--------------|------------------|-----------------|--------------------|---------------------|---------------------------------------|
| raber-<br>2020-<br>dss_<br>ASV0<br>08 | Bact<br>eria | Firmicu<br>tes   | Clostridia      | Lachnospirale<br>s | Lachnospiracea<br>e | A2                                    |
| raber-<br>2020-<br>dss_<br>ASV0<br>09 | Bact<br>eria | Firmicu<br>tes   | Clostridia      | Lachnospirale<br>s | Lachnospiracea<br>e | Lachnospiraceae<br>_NK4A136_grou<br>p |
| raber-<br>2020-<br>dss_<br>ASV0<br>10 | Bact<br>eria | Bacteroi<br>dota | Bacteroidi<br>a | Bacteroidales      | Muribaculacea<br>e  | NA                                    |
| raber-<br>2020-<br>dss_<br>ASV0<br>11 | Bact<br>eria | Bacteroi<br>dota | Bacteroidi<br>a | Bacteroidales      | Muribaculacea<br>e  | NA                                    |
| raber-<br>2020-<br>dss_<br>ASV0<br>12 | Bact<br>eria | Firmicu<br>tes   | Clostridia      | Lachnospirale<br>s | Lachnospiracea<br>e | NA                                    |
| raber-<br>2020-<br>dss_<br>ASV0<br>13 | Bact<br>eria | Firmicu<br>tes   | Clostridia      | Lachnospirale<br>s | Lachnospiracea<br>e | Lachnospiraceae<br>_FCS020_group      |
| raber-<br>2020-<br>dss_<br>ASV0<br>14 | Bact<br>eria | Bacteroi<br>dota | Bacteroidi<br>a | Bacteroidales      | Muribaculacea<br>e  | NA                                    |
| raber-<br>2020-<br>dss_<br>ASV0<br>15 | Bact<br>eria | Firmicu<br>tes   | Clostridia      | Lachnospirale<br>s | Lachnospiracea<br>e | Lachnospiraceae<br>_NK4A136_grou<br>p |

|                                       |              |                  |                 |                     |                      |                                       |
|---------------------------------------|--------------|------------------|-----------------|---------------------|----------------------|---------------------------------------|
| raber-<br>2020-<br>dss_<br>ASV0<br>16 | Bact<br>eria | Firmicu<br>tes   | Clostridia      | Lachnospirale<br>s  | Lachnospiracea<br>e  | Lachnospiraceae<br>_NK4A136_grou<br>p |
| raber-<br>2020-<br>dss_<br>ASV0<br>17 | Bact<br>eria | Firmicu<br>tes   | Bacilli         | Lactobacillale<br>s | Lactobacillacea<br>e | Lactobacillus                         |
| raber-<br>2020-<br>dss_<br>ASV0<br>18 | Bact<br>eria | Firmicu<br>tes   | Clostridia      | Lachnospirale<br>s  | Lachnospiracea<br>e  | Lachnospiraceae<br>_NK4A136_grou<br>p |
| raber-<br>2020-<br>dss_<br>ASV0<br>19 | Bact<br>eria | Bacteroi<br>dota | Bacteroidi<br>a | Bacteroidales       | Muribaculacea<br>e   | NA                                    |
| raber-<br>2020-<br>dss_<br>ASV0<br>20 | Bact<br>eria | Bacteroi<br>dota | Bacteroidi<br>a | Bacteroidales       | Muribaculacea<br>e   | NA                                    |
| raber-<br>2020-<br>dss_<br>ASV0<br>21 | Bact<br>eria | Firmicu<br>tes   | Clostridia      | Lachnospirale<br>s  | Lachnospiracea<br>e  | NA                                    |
| raber-<br>2020-<br>dss_<br>ASV0<br>22 | Bact<br>eria | Firmicu<br>tes   | Clostridia      | Lachnospirale<br>s  | Lachnospiracea<br>e  | Lachnospiraceae<br>_NK4A136_grou<br>p |
| raber-<br>2020-<br>dss_<br>ASV0<br>23 | Bact<br>eria | Firmicu<br>tes   | Clostridia      | Lachnospirale<br>s  | Lachnospiracea<br>e  | Roseburia                             |

|                         |            |              |                  |                 |                     |                     |                                       |
|-------------------------|------------|--------------|------------------|-----------------|---------------------|---------------------|---------------------------------------|
| raber-<br>2020-<br>dss_ | ASV0<br>24 | Bact<br>eria | Firmicu<br>tes   | Clostridia      | Lachnospirale<br>s  | Lachnospiracea<br>e | Roseburia                             |
| raber-<br>2020-<br>dss_ | ASV0<br>25 | Bact<br>eria | Firmicu<br>tes   | Clostridia      | Lachnospirale<br>s  | Lachnospiracea<br>e | Lachnospiraceae<br>_NK4A136_grou<br>p |
| raber-<br>2020-<br>dss_ | ASV0<br>26 | Bact<br>eria | Firmicu<br>tes   | Clostridia      | Lachnospirale<br>s  | Lachnospiracea<br>e | Lachnospiraceae<br>_NK4A136_grou<br>p |
| raber-<br>2020-<br>dss_ | ASV0<br>27 | Bact<br>eria | Firmicu<br>tes   | Clostridia      | Oscillospirale<br>s | Ruminococcace<br>ae | NA                                    |
| raber-<br>2020-<br>dss_ | ASV0<br>28 | Bact<br>eria | Firmicu<br>tes   | Clostridia      | Lachnospirale<br>s  | Lachnospiracea<br>e | Roseburia                             |
| raber-<br>2020-<br>dss_ | ASV0<br>29 | Bact<br>eria | Bacteroi<br>dota | Bacteroidi<br>a | Bacteroidales       | Muribaculacea<br>e  | NA                                    |
| raber-<br>2020-<br>dss_ | ASV0<br>30 | Bact<br>eria | Firmicu<br>tes   | Clostridia      | Lachnospirale<br>s  | Lachnospiracea<br>e | NA                                    |
| raber-<br>2020-<br>dss_ | ASV0<br>31 | Bact<br>eria | Firmicu<br>tes   | Clostridia      | Lachnospirale<br>s  | Lachnospiracea<br>e | Roseburia                             |

|                                       |              |                  |                 |                        |                         |                       |
|---------------------------------------|--------------|------------------|-----------------|------------------------|-------------------------|-----------------------|
| raher-<br>2020-<br>dss_<br>ASV0<br>32 | Bact<br>eria | Bacteroi<br>dota | Bacteroidi<br>a | Bacteroidales          | Muribaculacea<br>e      | NA                    |
| raher-<br>2020-<br>dss_<br>ASV0<br>33 | Bact<br>eria | Bacteroi<br>dota | Bacteroidi<br>a | Bacteroidales          | Muribaculacea<br>e      | NA                    |
| raher-<br>2020-<br>dss_<br>ASV0<br>34 | Bact<br>eria | Bacteroi<br>dota | Bacteroidi<br>a | Bacteroidales          | Muribaculacea<br>e      | NA                    |
| raher-<br>2020-<br>dss_<br>ASV0<br>35 | Bact<br>eria | Firmicu<br>tes   | Clostridia      | Lachnospirale<br>s     | Lachnospiracea<br>e     | NA                    |
| raher-<br>2020-<br>dss_<br>ASV0<br>36 | Bact<br>eria | Firmicu<br>tes   | Bacilli         | Erysipelotrich<br>ales | Erysipelotricha<br>ceae | Faecalibaculum        |
| raher-<br>2020-<br>dss_<br>ASV0<br>37 | Bact<br>eria | Firmicu<br>tes   | Clostridia      | Lachnospirale<br>s     | Lachnospiracea<br>e     | Lachnoclostridiu<br>m |
| raher-<br>2020-<br>dss_<br>ASV0<br>38 | Bact<br>eria | Firmicu<br>tes   | Bacilli         | Staphylococca<br>les   | Staphylococcac<br>eae   | Staphylococcus        |
| raher-<br>2020-<br>dss_<br>ASV0<br>39 | Bact<br>eria | Firmicu<br>tes   | Clostridia      | Lachnospirale<br>s     | Lachnospiracea<br>e     | Roseburia             |

|                                       |              |                  |                 |                    |                     |                                       |
|---------------------------------------|--------------|------------------|-----------------|--------------------|---------------------|---------------------------------------|
| raber-<br>2020-<br>dss_<br>ASV0<br>40 | Bact<br>eria | Bacteroi<br>dota | Bacteroidi<br>a | Bacteroidales      | Muribaculacea<br>e  | NA                                    |
| raber-<br>2020-<br>dss_<br>ASV0<br>41 | Bact<br>eria | Firmicu<br>tes   | Clostridia      | Lachnospirale<br>s | Lachnospiracea<br>e | Lachnospiraceae<br>_NK4A136_grou<br>p |
| raber-<br>2020-<br>dss_<br>ASV0<br>42 | Bact<br>eria | Bacteroi<br>dota | Bacteroidi<br>a | Bacteroidales      | Marinifilaceae      | Odoribacter                           |
| raber-<br>2020-<br>dss_<br>ASV0<br>43 | Bact<br>eria | Bacteroi<br>dota | Bacteroidi<br>a | Bacteroidales      | Rikenellaceae       | Alistipes                             |
| raber-<br>2020-<br>dss_<br>ASV0<br>44 | Bact<br>eria | Firmicu<br>tes   | Clostridia      | Clostridiales      | Clostridiaceae      | Clostridium_sen<br>su_stricto_1       |
| raber-<br>2020-<br>dss_<br>ASV0<br>45 | Bact<br>eria | Bacteroi<br>dota | Bacteroidi<br>a | Bacteroidales      | Rikenellaceae       | Alistipes                             |
| raber-<br>2020-<br>dss_<br>ASV0<br>46 | Bact<br>eria | Firmicu<br>tes   | Clostridia      | Lachnospirale<br>s | Lachnospiracea<br>e | A2                                    |
| raber-<br>2020-<br>dss_<br>ASV0<br>47 | Bact<br>eria | Bacteroi<br>dota | Bacteroidi<br>a | Bacteroidales      | Rikenellaceae       | Alistipes                             |

|                                       |              |                  |                 |                     |                       |                                 |
|---------------------------------------|--------------|------------------|-----------------|---------------------|-----------------------|---------------------------------|
| raber-<br>2020-<br>dss_<br>ASV0<br>48 | Bact<br>eria | Firmicu<br>tes   | Clostridia      | Lachnospirale<br>s  | Lachnospiracea<br>e   | Marvinbryantia                  |
| raber-<br>2020-<br>dss_<br>ASV0<br>49 | Bact<br>eria | Firmicu<br>tes   | Clostridia      | Lachnospirale<br>s  | Lachnospiracea<br>e   | NA                              |
| raber-<br>2020-<br>dss_<br>ASV0<br>50 | Bact<br>eria | Firmicu<br>tes   | Clostridia      | Lachnospirale<br>s  | Lachnospiracea<br>e   | Lachnospiraceae<br>_NK4B4_group |
| raber-<br>2020-<br>dss_<br>ASV0<br>51 | Bact<br>eria | Firmicu<br>tes   | Clostridia      | Oscillospirale<br>s | Butyricicoccace<br>ae | Butyricicoccus                  |
| raber-<br>2020-<br>dss_<br>ASV0<br>52 | Bact<br>eria | Firmicu<br>tes   | Clostridia      | Lachnospirale<br>s  | Lachnospiracea<br>e   | NA                              |
| raber-<br>2020-<br>dss_<br>ASV0<br>53 | Bact<br>eria | Bacteroi<br>dota | Bacteroidi<br>a | Bacteroidales       | Muribaculacea<br>e    | NA                              |
| raber-<br>2020-<br>dss_<br>ASV0<br>54 | Bact<br>eria | Firmicu<br>tes   | Clostridia      | Lachnospirale<br>s  | Lachnospiracea<br>e   | Lachnospiraceae<br>_UCG-001     |
| raber-<br>2020-<br>dss_<br>ASV0<br>55 | Bact<br>eria | Bacteroi<br>dota | Bacteroidi<br>a | Bacteroidales       | Muribaculacea<br>e    | NA                              |

|                                       |              |                  |                 |                                    |                         |                                       |
|---------------------------------------|--------------|------------------|-----------------|------------------------------------|-------------------------|---------------------------------------|
| raher-<br>2020-<br>dss_<br>ASV0<br>56 | Bact<br>eria | Firmicu<br>tes   | Clostridia      | Oscillospirale<br>s                | Ruminococcace<br>ae     | Incertae_Sedis                        |
| raher-<br>2020-<br>dss_<br>ASV0<br>57 | Bact<br>eria | Firmicu<br>tes   | Clostridia      | Lachnospirale<br>s                 | Lachnospiraceae         | NA                                    |
| raher-<br>2020-<br>dss_<br>ASV0<br>58 | Bact<br>eria | Firmicu<br>tes   | Clostridia      | Clostridia_vad<br>inBB60_grou<br>p | NA                      | NA                                    |
| raher-<br>2020-<br>dss_<br>ASV0<br>59 | Bact<br>eria | Bacteroi<br>dota | Bacteroidi<br>a | Bacteroidales                      | Bacteroidaceae          | Bacteroides                           |
| raher-<br>2020-<br>dss_<br>ASV0<br>60 | Bact<br>eria | Firmicu<br>tes   | Clostridia      | Oscillospirale<br>s                | Oscillospiraceae        | Oscillibacter                         |
| raher-<br>2020-<br>dss_<br>ASV0<br>61 | Bact<br>eria | Firmicu<br>tes   | Bacilli         | Erysipelotrich<br>ales             | Erysipelotricha<br>ceae | Dubosiella                            |
| raher-<br>2020-<br>dss_<br>ASV0<br>62 | Bact<br>eria | Firmicu<br>tes   | Clostridia      | Lachnospirale<br>s                 | Lachnospiraceae         | Lachnospiraceae<br>_NK4A136_grou<br>p |
| raher-<br>2020-<br>dss_<br>ASV0<br>63 | Bact<br>eria | Bacteroi<br>dota | Bacteroidi<br>a | Bacteroidales                      | Muribaculaceae          | NA                                    |

|                                       |              |                  |                 |                     |                     |                                       |
|---------------------------------------|--------------|------------------|-----------------|---------------------|---------------------|---------------------------------------|
| raher-<br>2020-<br>dss_<br>ASV0<br>65 | Bact<br>eria | Firmicu<br>tes   | Clostridia      | Oscillospirale<br>s | Ruminococcace<br>ae | NA                                    |
| raher-<br>2020-<br>dss_<br>ASV0<br>66 | Bact<br>eria | Firmicu<br>tes   | Clostridia      | Oscillospirale<br>s | NA                  | NA                                    |
| raher-<br>2020-<br>dss_<br>ASV0<br>67 | Bact<br>eria | Firmicu<br>tes   | Clostridia      | Lachnospirale<br>s  | Lachnospiraceae     | Lachnospiraceae<br>_NK4A136_grou<br>p |
| raher-<br>2020-<br>dss_<br>ASV0<br>68 | Bact<br>eria | Firmicu<br>tes   | Clostridia      | Oscillospirale<br>s | Oscillospiraceae    | NA                                    |
| raher-<br>2020-<br>dss_<br>ASV0<br>69 | Bact<br>eria | Firmicu<br>tes   | Clostridia      | Lachnospirale<br>s  | Lachnospiraceae     | NA                                    |
| raher-<br>2020-<br>dss_<br>ASV0<br>70 | Bact<br>eria | Firmicu<br>tes   | Clostridia      | Lachnospirale<br>s  | Lachnospiraceae     | Roseburia                             |
| raher-<br>2020-<br>dss_<br>ASV0<br>71 | Bact<br>eria | Firmicu<br>tes   | Clostridia      | Lachnospirale<br>s  | Lachnospiraceae     | NA                                    |
| raher-<br>2020-<br>dss_<br>ASV0<br>72 | Bact<br>eria | Bacteroi<br>dota | Bacteroidi<br>a | Bacteroidales       | Rikenellaceae       | Alistipes                             |

|                                       |              |                  |                 |                     |                      |               |
|---------------------------------------|--------------|------------------|-----------------|---------------------|----------------------|---------------|
| raher-<br>2020-<br>dss_<br>ASV0<br>73 | Bact<br>eria | Firmicu<br>tes   | Clostridia      | Oscillospirale<br>s | Oscillospiracea<br>e | Oscillibacter |
| raher-<br>2020-<br>dss_<br>ASV0<br>74 | Bact<br>eria | Firmicu<br>tes   | Clostridia      | Lachnospirale<br>s  | Lachnospiracea<br>e  | Acetatifactor |
| raher-<br>2020-<br>dss_<br>ASV0<br>75 | Bact<br>eria | Firmicu<br>tes   | Clostridia      | Lachnospirale<br>s  | Lachnospiracea<br>e  | NA            |
| raher-<br>2020-<br>dss_<br>ASV0<br>76 | Bact<br>eria | Firmicu<br>tes   | Clostridia      | Lachnospirale<br>s  | Lachnospiracea<br>e  | Acetatifactor |
| raher-<br>2020-<br>dss_<br>ASV0<br>77 | Bact<br>eria | Firmicu<br>tes   | Clostridia      | Lachnospirale<br>s  | Lachnospiracea<br>e  | Roseburia     |
| raher-<br>2020-<br>dss_<br>ASV0<br>78 | Bact<br>eria | Firmicu<br>tes   | Clostridia      | Lachnospirale<br>s  | Lachnospiracea<br>e  | NA            |
| raher-<br>2020-<br>dss_<br>ASV0<br>79 | Bact<br>eria | Firmicu<br>tes   | Bacilli         | RF39                | NA                   | NA            |
| raher-<br>2020-<br>dss_<br>ASV0<br>80 | Bact<br>eria | Bacteroi<br>dota | Bacteroidi<br>a | Bacteroidales       | Muribaculacea<br>e   | NA            |

|                                       |              |                  |                 |                     |                      |                                       |
|---------------------------------------|--------------|------------------|-----------------|---------------------|----------------------|---------------------------------------|
| raher-<br>2020-<br>dss_<br>ASV0<br>81 | Bact<br>eria | Firmicu<br>tes   | Clostridia      | Oscillospirale<br>s | Oscillospiracea<br>e | NA                                    |
| raher-<br>2020-<br>dss_<br>ASV0<br>82 | Bact<br>eria | Firmicu<br>tes   | Clostridia      | Lachnospirale<br>s  | Lachnospiracea<br>e  | NA                                    |
| raher-<br>2020-<br>dss_<br>ASV0<br>83 | Bact<br>eria | Firmicu<br>tes   | Clostridia      | Lachnospirale<br>s  | Lachnospiracea<br>e  | Lachnospiraceae<br>_NK4A136_grou<br>p |
| raher-<br>2020-<br>dss_<br>ASV0<br>84 | Bact<br>eria | Firmicu<br>tes   | Clostridia      | Lachnospirale<br>s  | Lachnospiracea<br>e  | NA                                    |
| raher-<br>2020-<br>dss_<br>ASV0<br>85 | Bact<br>eria | Firmicu<br>tes   | Clostridia      | Lachnospirale<br>s  | Lachnospiracea<br>e  | NA                                    |
| raher-<br>2020-<br>dss_<br>ASV0<br>86 | Bact<br>eria | Bacteroi<br>dota | Bacteroidi<br>a | Bacteroidales       | Muribaculacea<br>e   | NA                                    |
| raher-<br>2020-<br>dss_<br>ASV0<br>87 | Bact<br>eria | Firmicu<br>tes   | Clostridia      | Lachnospirale<br>s  | Lachnospiracea<br>e  | Lachnospiraceae<br>_NK4A136_grou<br>p |
| raher-<br>2020-<br>dss_<br>ASV0<br>88 | Bact<br>eria | Firmicu<br>tes   | Clostridia      | Oscillospirale<br>s | Oscillospiracea<br>e | Colidextribacter                      |

|                                       |              |                  |                 |                                    |                     |                            |
|---------------------------------------|--------------|------------------|-----------------|------------------------------------|---------------------|----------------------------|
| raher-<br>2020-<br>dss_<br>ASV0<br>89 | Bact<br>eria | Firmicu<br>tes   | Clostridia      | Lachnospirale<br>s                 | Lachnospiracea<br>e | NA                         |
| raher-<br>2020-<br>dss_<br>ASV0<br>90 | Bact<br>eria | Bacteroi<br>dota | Bacteroidi<br>a | Bacteroidales                      | Prevotellaceae      | Prevotellaceae_<br>UCG-001 |
| raher-<br>2020-<br>dss_<br>ASV0<br>91 | Bact<br>eria | Firmicu<br>tes   | Clostridia      | Clostridia_va<br>dinBB60_grou<br>p | NA                  | NA                         |
| raher-<br>2020-<br>dss_<br>ASV0<br>92 | Bact<br>eria | Bacteroi<br>dota | Bacteroidi<br>a | Bacteroidales                      | Muribaculacea<br>e  | NA                         |
| raher-<br>2020-<br>dss_<br>ASV0<br>93 | Bact<br>eria | Firmicu<br>tes   | Clostridia      | Lachnospirale<br>s                 | Lachnospiracea<br>e | GCA-900066575              |
| raher-<br>2020-<br>dss_<br>ASV0<br>94 | Bact<br>eria | Firmicu<br>tes   | Clostridia      | Oscillospirale<br>s                | Ruminococcace<br>ae | Incertae_Sedis             |
| raher-<br>2020-<br>dss_<br>ASV0<br>95 | Bact<br>eria | Firmicu<br>tes   | Clostridia      | Lachnospirale<br>s                 | Lachnospiracea<br>e | ASF356                     |
| raher-<br>2020-<br>dss_<br>ASV0<br>96 | Bact<br>eria | Firmicu<br>tes   | Clostridia      | Lachnospirale<br>s                 | Lachnospiracea<br>e | NA                         |

|                                       |              |                  |                 |                     |                      |                                       |
|---------------------------------------|--------------|------------------|-----------------|---------------------|----------------------|---------------------------------------|
| raber-<br>2020-<br>dss_<br>ASV0<br>97 | Bact<br>eria | Firmicu<br>tes   | Clostridia      | Lachnospirale<br>s  | Lachnospiracea<br>e  | Lachnospiraceae<br>_NK4A136_grou<br>p |
| raber-<br>2020-<br>dss_<br>ASV0<br>98 | Bact<br>eria | Bacteroi<br>dota | Bacteroidi<br>a | Bacteroidales       | Muribaculacea<br>e   | Muribaculum                           |
| raber-<br>2020-<br>dss_<br>ASV0<br>99 | Bact<br>eria | Firmicu<br>tes   | Clostridia      | Oscillospirale<br>s | Oscillospiracea<br>e | NA                                    |
| raber-<br>2020-<br>dss_<br>ASV1<br>00 | Bact<br>eria | Firmicu<br>tes   | Clostridia      | Oscillospirale<br>s | Oscillospiracea<br>e | NA                                    |
| raber-<br>2020-<br>dss_<br>ASV1<br>01 | Bact<br>eria | Firmicu<br>tes   | Clostridia      | Lachnospirale<br>s  | Lachnospiracea<br>e  | NA                                    |
| raber-<br>2020-<br>dss_<br>ASV1<br>02 | Bact<br>eria | Firmicu<br>tes   | Clostridia      | Lachnospirale<br>s  | Lachnospiracea<br>e  | Roseburia                             |
| raber-<br>2020-<br>dss_<br>ASV1<br>03 | Bact<br>eria | Firmicu<br>tes   | Clostridia      | Lachnospirale<br>s  | Lachnospiracea<br>e  | NA                                    |
| raber-<br>2020-<br>dss_<br>ASV1<br>04 | Bact<br>eria | Firmicu<br>tes   | Clostridia      | Lachnospirale<br>s  | Lachnospiracea<br>e  | Acetatifactor                         |

|                                       |              |                  |                 |                     |                       |                |
|---------------------------------------|--------------|------------------|-----------------|---------------------|-----------------------|----------------|
| raber-<br>2020-<br>dss_<br>ASV1<br>05 | Bact<br>eria | Bacteroi<br>dota | Bacteroidi<br>a | Bacteroidales       | Muribaculacea<br>e    | NA             |
| raber-<br>2020-<br>dss_<br>ASV1<br>06 | Bact<br>eria | Firmicu<br>tes   | Clostridia      | Lachnospirale<br>s  | Lachnospiracea<br>e   | Roseburia      |
| raber-<br>2020-<br>dss_<br>ASV1<br>07 | Bact<br>eria | Firmicu<br>tes   | Clostridia      | Lachnospirale<br>s  | Lachnospiracea<br>e   | NA             |
| raber-<br>2020-<br>dss_<br>ASV1<br>08 | Bact<br>eria | Firmicu<br>tes   | Clostridia      | Lachnospirale<br>s  | Lachnospiracea<br>e   | NA             |
| raber-<br>2020-<br>dss_<br>ASV1<br>09 | Bact<br>eria | Firmicu<br>tes   | Clostridia      | Oscillospirale<br>s | Butyricicoccace<br>ae | Butyricicoccus |
| raber-<br>2020-<br>dss_<br>ASV1<br>10 | Bact<br>eria | Firmicu<br>tes   | Clostridia      | Oscillospirale<br>s | Oscillospiracea<br>e  | NA             |
| raber-<br>2020-<br>dss_<br>ASV1<br>11 | Bact<br>eria | Firmicu<br>tes   | Clostridia      | Oscillospirale<br>s | Ruminococcace<br>ae   | Incertae_Sedis |
| raber-<br>2020-<br>dss_<br>ASV1<br>12 | Bact<br>eria | Firmicu<br>tes   | Clostridia      | Lachnospirale<br>s  | Lachnospiracea<br>e   | NA             |

|                                       |              |                  |                 |                     |                      |                                       |
|---------------------------------------|--------------|------------------|-----------------|---------------------|----------------------|---------------------------------------|
| raher-<br>2020-<br>dss_<br>ASV1<br>13 | Bact<br>eria | Firmicu<br>tes   | Clostridia      | Lachnospirale<br>s  | Lachnospiracea<br>e  | Lachnoclostridiu<br>m                 |
| raher-<br>2020-<br>dss_<br>ASV1<br>14 | Bact<br>eria | Firmicu<br>tes   | Clostridia      | Clostridiales       | Clostridiaceae       | Clostridium_sen<br>su_stricto_1       |
| raher-<br>2020-<br>dss_<br>ASV1<br>15 | Bact<br>eria | Bacteroi<br>dota | Bacteroidi<br>a | Bacteroidales       | Muribaculacea<br>e   | NA                                    |
| raher-<br>2020-<br>dss_<br>ASV1<br>16 | Bact<br>eria | Firmicu<br>tes   | Clostridia      | Oscillospirale<br>s | Ruminococcace<br>ae  | Incertae_Sedis                        |
| raher-<br>2020-<br>dss_<br>ASV1<br>17 | Bact<br>eria | Firmicu<br>tes   | Clostridia      | Oscillospirale<br>s | Oscillospiracea<br>e | Colidextribacter                      |
| raher-<br>2020-<br>dss_<br>ASV1<br>18 | Bact<br>eria | Firmicu<br>tes   | Clostridia      | Lachnospirale<br>s  | Lachnospiracea<br>e  | Lachnoclostridiu<br>m                 |
| raher-<br>2020-<br>dss_<br>ASV1<br>19 | Bact<br>eria | Firmicu<br>tes   | Clostridia      | Lachnospirale<br>s  | Lachnospiracea<br>e  | Lachnospiraceae<br>_NK4A136_grou<br>p |
| raher-<br>2020-<br>dss_<br>ASV1<br>20 | Bact<br>eria | Firmicu<br>tes   | Clostridia      | Lachnospirale<br>s  | Lachnospiracea<br>e  | ASF356                                |

|                                       |              |                  |                 |                     |                       |                |
|---------------------------------------|--------------|------------------|-----------------|---------------------|-----------------------|----------------|
| raber-<br>2020-<br>dss_<br>ASV1<br>21 | Bact<br>eria | Firmicu<br>tes   | Clostridia      | Lachnospirale<br>s  | Lachnospiracea<br>e   | Marvinbryantia |
| raber-<br>2020-<br>dss_<br>ASV1<br>22 | Bact<br>eria | Bacteroi<br>dota | Bacteroidi<br>a | Bacteroidales       | Muribaculacea<br>e    | NA             |
| raber-<br>2020-<br>dss_<br>ASV1<br>23 | Bact<br>eria | Firmicu<br>tes   | Clostridia      | Lachnospirale<br>s  | Lachnospiracea<br>e   | NA             |
| raber-<br>2020-<br>dss_<br>ASV1<br>24 | Bact<br>eria | Firmicu<br>tes   | Clostridia      | Lachnospirale<br>s  | Lachnospiracea<br>e   | NA             |
| raber-<br>2020-<br>dss_<br>ASV1<br>25 | Bact<br>eria | Firmicu<br>tes   | Clostridia      | Oscillospirale<br>s | Butyricicoccace<br>ae | UCG-009        |
| raber-<br>2020-<br>dss_<br>ASV1<br>26 | Bact<br>eria | Firmicu<br>tes   | Clostridia      | Oscillospirale<br>s | Oscillospiracea<br>e  | Oscillibacter  |
| raber-<br>2020-<br>dss_<br>ASV1<br>27 | Bact<br>eria | Firmicu<br>tes   | Clostridia      | Lachnospirale<br>s  | Lachnospiracea<br>e   | NA             |
| raber-<br>2020-<br>dss_<br>ASV1<br>28 | Bact<br>eria | Firmicu<br>tes   | Clostridia      | Lachnospirale<br>s  | Lachnospiracea<br>e   | NA             |

|                                       |              |                |            |                        |                         |                                       |
|---------------------------------------|--------------|----------------|------------|------------------------|-------------------------|---------------------------------------|
| raber-<br>2020-<br>dss_<br>ASV1<br>29 | Bact<br>eria | Firmicu<br>tes | Bacilli    | Erysipelotrich<br>ales | Erysipelotricha<br>ceae | Turicibacter                          |
| raber-<br>2020-<br>dss_<br>ASV1<br>30 | Bact<br>eria | Firmicu<br>tes | Clostridia | Lachnospirale<br>s     | Lachnospiracea<br>e     | Lachnospiraceae<br>_NK4A136_grou<br>p |
| raber-<br>2020-<br>dss_<br>ASV1<br>31 | Bact<br>eria | Firmicu<br>tes | Clostridia | Lachnospirale<br>s     | Lachnospiracea<br>e     | Acetatifactor                         |
| raber-<br>2020-<br>dss_<br>ASV1<br>32 | Bact<br>eria | Firmicu<br>tes | Clostridia | Oscillospirale<br>s    | Ruminococcace<br>ae     | Anaerotruncus                         |
| raber-<br>2020-<br>dss_<br>ASV1<br>33 | Bact<br>eria | Firmicu<br>tes | Clostridia | Lachnospirale<br>s     | Lachnospiracea<br>e     | NA                                    |
| raber-<br>2020-<br>dss_<br>ASV1<br>34 | Bact<br>eria | Firmicu<br>tes | Clostridia | Lachnospirale<br>s     | Lachnospiracea<br>e     | NA                                    |
| raber-<br>2020-<br>dss_<br>ASV1<br>35 | Bact<br>eria | Firmicu<br>tes | Clostridia | Lachnospirale<br>s     | Lachnospiracea<br>e     | NA                                    |
| raber-<br>2020-<br>dss_<br>ASV1<br>36 | Bact<br>eria | Firmicu<br>tes | Clostridia | Oscillospirale<br>s    | Oscillospiracea<br>e    | NA                                    |

|                                       |              |                  |                 |                                    |                     |                                       |
|---------------------------------------|--------------|------------------|-----------------|------------------------------------|---------------------|---------------------------------------|
| raber-<br>2020-<br>dss_<br>ASV1<br>37 | Bact<br>eria | Firmicu<br>tes   | Clostridia      | Lachnospirale<br>s                 | Lachnospiracea<br>e | Lachnospiraceae<br>_FCS020_group      |
| raber-<br>2020-<br>dss_<br>ASV1<br>38 | Bact<br>eria | Firmicu<br>tes   | Clostridia      | Lachnospirale<br>s                 | Lachnospiracea<br>e | Lachnospiraceae<br>_NK4A136_grou<br>p |
| raber-<br>2020-<br>dss_<br>ASV1<br>39 | Bact<br>eria | Bacteroi<br>dota | Bacteroidi<br>a | Bacteroidales                      | Muribaculacea<br>e  | NA                                    |
| raber-<br>2020-<br>dss_<br>ASV1<br>40 | Bact<br>eria | Firmicu<br>tes   | Clostridia      | Lachnospirale<br>s                 | Lachnospiracea<br>e | NA                                    |
| raber-<br>2020-<br>dss_<br>ASV1<br>41 | Bact<br>eria | Bacteroi<br>dota | Bacteroidi<br>a | Bacteroidales                      | Muribaculacea<br>e  | NA                                    |
| raber-<br>2020-<br>dss_<br>ASV1<br>42 | Bact<br>eria | Firmicu<br>tes   | Clostridia      | Lachnospirale<br>s                 | Lachnospiracea<br>e | NA                                    |
| raber-<br>2020-<br>dss_<br>ASV1<br>43 | Bact<br>eria | Firmicu<br>tes   | Clostridia      | Clostridia_va<br>dinBB60_grou<br>p | NA                  | NA                                    |
| raber-<br>2020-<br>dss_<br>ASV1<br>44 | Bact<br>eria | Bacteroi<br>dota | Bacteroidi<br>a | Bacteroidales                      | Prevotellaceae      | Alloprevotella                        |

|                                       |              |                  |                 |                     |                      |                             |
|---------------------------------------|--------------|------------------|-----------------|---------------------|----------------------|-----------------------------|
| raber-<br>2020-<br>dss_<br>ASV1<br>45 | Bact<br>eria | Firmicu<br>tes   | Clostridia      | Lachnospirale<br>s  | Lachnospiracea<br>e  | Lachnospiraceae<br>_UCG-001 |
| raber-<br>2020-<br>dss_<br>ASV1<br>46 | Bact<br>eria | Firmicu<br>tes   | Clostridia      | Lachnospirale<br>s  | Lachnospiracea<br>e  | Lachnospiraceae<br>_UCG-001 |
| raber-<br>2020-<br>dss_<br>ASV1<br>47 | Bact<br>eria | Firmicu<br>tes   | Clostridia      | Lachnospirale<br>s  | Lachnospiracea<br>e  | GCA-900066575               |
| raber-<br>2020-<br>dss_<br>ASV1<br>48 | Bact<br>eria | Firmicu<br>tes   | Clostridia      | Oscillospirale<br>s | Oscillospiracea<br>e | Intestinimonas              |
| raber-<br>2020-<br>dss_<br>ASV1<br>49 | Bact<br>eria | Firmicu<br>tes   | Clostridia      | Oscillospirale<br>s | Oscillospiracea<br>e | Colidextribacter            |
| raber-<br>2020-<br>dss_<br>ASV1<br>50 | Bact<br>eria | Bacteroi<br>dota | Bacteroidi<br>a | Bacteroidales       | Muribaculacea<br>e   | NA                          |
| raber-<br>2020-<br>dss_<br>ASV1<br>51 | Bact<br>eria | Bacteroi<br>dota | Bacteroidi<br>a | Bacteroidales       | Bacteroidaceae       | Bacteroides                 |
| raber-<br>2020-<br>dss_<br>ASV1<br>52 | Bact<br>eria | Firmicu<br>tes   | Clostridia      | Lachnospirale<br>s  | Lachnospiracea<br>e  | Eisenbergiella              |

|                                       |              |                  |                 |                        |                       |                             |
|---------------------------------------|--------------|------------------|-----------------|------------------------|-----------------------|-----------------------------|
| raher-<br>2020-<br>dss_<br>ASV1<br>53 | Bact<br>eria | Firmicu<br>tes   | Clostridia      | Clostridia_UC<br>G-014 | NA                    | NA                          |
| raher-<br>2020-<br>dss_<br>ASV1<br>54 | Bact<br>eria | Firmicu<br>tes   | Clostridia      | Lachnospirale<br>s     | Lachnospiracea<br>e   | Lachnospiraceae<br>_UCG-006 |
| raher-<br>2020-<br>dss_<br>ASV1<br>55 | Bact<br>eria | Firmicu<br>tes   | Clostridia      | Lachnospirale<br>s     | Lachnospiracea<br>e   | Roseburia                   |
| raher-<br>2020-<br>dss_<br>ASV1<br>56 | Bact<br>eria | Firmicu<br>tes   | Clostridia      | Lachnospirale<br>s     | Lachnospiracea<br>e   | NA                          |
| raher-<br>2020-<br>dss_<br>ASV1<br>57 | Bact<br>eria | Firmicu<br>tes   | Clostridia      | Lachnospirale<br>s     | Lachnospiracea<br>e   | NA                          |
| raher-<br>2020-<br>dss_<br>ASV1<br>58 | Bact<br>eria | Bacteroi<br>dota | Bacteroidi<br>a | Bacteroidales          | Muribaculacea<br>e    | NA                          |
| raher-<br>2020-<br>dss_<br>ASV1<br>59 | Bact<br>eria | Firmicu<br>tes   | Clostridia      | Clostridia_UC<br>G-014 | NA                    | NA                          |
| raher-<br>2020-<br>dss_<br>ASV1<br>60 | Bact<br>eria | Firmicu<br>tes   | Clostridia      | Oscillospirale<br>s    | Butyricicoccace<br>ae | Butyricicoccus              |

|                         |            |              |                  |                 |                     |                      |                                       |
|-------------------------|------------|--------------|------------------|-----------------|---------------------|----------------------|---------------------------------------|
| raher-<br>2020-<br>dss_ | ASV1<br>61 | Bact<br>eria | Firmicu<br>tes   | Clostridia      | Oscillospirale<br>s | Oscillospiracea<br>e | NA                                    |
| raher-<br>2020-<br>dss_ | ASV1<br>62 | Bact<br>eria | Firmicu<br>tes   | Clostridia      | Oscillospirale<br>s | Oscillospiracea<br>e | Colidextribacter                      |
| raher-<br>2020-<br>dss_ | ASV1<br>63 | Bact<br>eria | Firmicu<br>tes   | Clostridia      | Lachnospirale<br>s  | Lachnospiracea<br>e  | NA                                    |
| raher-<br>2020-<br>dss_ | ASV1<br>64 | Bact<br>eria | Firmicu<br>tes   | Clostridia      | Lachnospirale<br>s  | Lachnospiracea<br>e  | Lachnospiraceae<br>_UCG-004           |
| raher-<br>2020-<br>dss_ | ASV1<br>65 | Bact<br>eria | Bacteroi<br>dota | Bacteroidi<br>a | Bacteroidales       | Bacteroidaceae       | Bacteroides                           |
| raher-<br>2020-<br>dss_ | ASV1<br>66 | Bact<br>eria | Firmicu<br>tes   | Clostridia      | Lachnospirale<br>s  | Lachnospiracea<br>e  | Lachnospiraceae<br>_NK4A136_grou<br>p |
| raher-<br>2020-<br>dss_ | ASV1<br>67 | Bact<br>eria | Firmicu<br>tes   | Clostridia      | Oscillospirale<br>s | Ruminococcace<br>ae  | Anaerotruncus                         |
| raher-<br>2020-<br>dss_ | ASV1<br>68 | Bact<br>eria | Firmicu<br>tes   | Clostridia      | Lachnospirale<br>s  | Lachnospiracea<br>e  | Roseburia                             |

|                 |      |          |            |            |                            |                  |                         |
|-----------------|------|----------|------------|------------|----------------------------|------------------|-------------------------|
| raber-2020-dss_ | ASV1 | Bacteria | Firmicutes | Bacilli    | RF39                       | NA               | NA                      |
| raber-2020-dss_ | ASV1 | Bacteria | Firmicutes | Clostridia | Oscillospirales            | Oscillospiraceae | Oscillibacter           |
| raber-2020-dss_ | ASV1 | Bacteria | Firmicutes | Clostridia | Clostridia_vadinBB60_group | NA               | NA                      |
| raber-2020-dss_ | ASV1 | Bacteria | Firmicutes | Clostridia | Lachnospirales             | Lachnospiraceae  | NA                      |
| raber-2020-dss_ | ASV1 | Bacteria | Firmicutes | Clostridia | Lachnospirales             | Lachnospiraceae  | NA                      |
| raber-2020-dss_ | ASV1 | Bacteria | Firmicutes | Clostridia | Lachnospirales             | Lachnospiraceae  | Lachnospiraceae_UCG-006 |
| raber-2020-dss_ | ASV1 | Bacteria | Firmicutes | Clostridia | Oscillospirales            | Oscillospiraceae | NA                      |
| raber-2020-dss_ | ASV1 | Bacteria | Firmicutes | Clostridia | Oscillospirales            | Oscillospiraceae | NA                      |

|                                       |              |                  |                 |                        |                      |                                       |
|---------------------------------------|--------------|------------------|-----------------|------------------------|----------------------|---------------------------------------|
| raher-<br>2020-<br>dss_<br>ASV1<br>77 | Bact<br>eria | Firmicu<br>tes   | Clostridia      | Oscillospirale<br>s    | Oscillospiracea<br>e | Oscillibacter                         |
| raher-<br>2020-<br>dss_<br>ASV1<br>78 | Bact<br>eria | Firmicu<br>tes   | Clostridia      | Clostridiales          | Clostridiaceae       | Clostridium_sen<br>su_stricto_1       |
| raher-<br>2020-<br>dss_<br>ASV1<br>79 | Bact<br>eria | Firmicu<br>tes   | Clostridia      | Oscillospirale<br>s    | Oscillospiracea<br>e | Oscillibacter                         |
| raher-<br>2020-<br>dss_<br>ASV1<br>80 | Bact<br>eria | Firmicu<br>tes   | Clostridia      | Lachnospirale<br>s     | Lachnospiracea<br>e  | Lachnospiraceae<br>_NK4A136_grou<br>p |
| raher-<br>2020-<br>dss_<br>ASV1<br>81 | Bact<br>eria | Bacteroi<br>dota | Bacteroidi<br>a | Bacteroidales          | Muribaculacea<br>e   | NA                                    |
| raher-<br>2020-<br>dss_<br>ASV1<br>82 | Bact<br>eria | Firmicu<br>tes   | Clostridia      | Clostridia_UC<br>G-014 | NA                   | NA                                    |
| raher-<br>2020-<br>dss_<br>ASV1<br>83 | Bact<br>eria | Firmicu<br>tes   | Clostridia      | Oscillospirale<br>s    | Oscillospiracea<br>e | NA                                    |
| raher-<br>2020-<br>dss_<br>ASV1<br>84 | Bact<br>eria | Firmicu<br>tes   | Clostridia      | Lachnospirale<br>s     | Lachnospiracea<br>e  | Lachnoclostridiu<br>m                 |

|                                       |              |                  |                 |                        |                               |                                       |
|---------------------------------------|--------------|------------------|-----------------|------------------------|-------------------------------|---------------------------------------|
| raber-<br>2020-<br>dss_<br>ASV1<br>85 | Bact<br>eria | Bacteroi<br>dota | Bacteroidi<br>a | Bacteroidales          | Muribaculacea<br>e            | NA                                    |
| raber-<br>2020-<br>dss_<br>ASV1<br>86 | Bact<br>eria | Firmicu<br>tes   | Clostridia      | Lachnospirale<br>s     | Lachnospiracea<br>e           | GCA-900066575                         |
| raber-<br>2020-<br>dss_<br>ASV1<br>87 | Bact<br>eria | Firmicu<br>tes   | Clostridia      | Lachnospirale<br>s     | Lachnospiracea<br>e           | NA                                    |
| raber-<br>2020-<br>dss_<br>ASV1<br>88 | Bact<br>eria | Firmicu<br>tes   | Bacilli         | Erysipelotrich<br>ales | Erysipelatoclos<br>tridiaceae | NA                                    |
| raber-<br>2020-<br>dss_<br>ASV1<br>89 | Bact<br>eria | Firmicu<br>tes   | Clostridia      | Lachnospirale<br>s     | Lachnospiracea<br>e           | Anaerostipes                          |
| raber-<br>2020-<br>dss_<br>ASV1<br>90 | Bact<br>eria | Firmicu<br>tes   | Clostridia      | Lachnospirale<br>s     | Lachnospiracea<br>e           | Lachnospiraceae<br>_NK4A136_grou<br>p |
| raber-<br>2020-<br>dss_<br>ASV1<br>91 | Bact<br>eria | Firmicu<br>tes   | Clostridia      | Lachnospirale<br>s     | Lachnospiracea<br>e           | Lachnospiraceae<br>_NK4A136_grou<br>p |
| raber-<br>2020-<br>dss_<br>ASV1<br>92 | Bact<br>eria | Firmicu<br>tes   | Clostridia      | Lachnospirale<br>s     | Lachnospiracea<br>e           | NA                                    |

|                                       |              |                |            |                        |                         |                             |
|---------------------------------------|--------------|----------------|------------|------------------------|-------------------------|-----------------------------|
| raber-<br>2020-<br>dss_<br>ASV1<br>93 | Bact<br>eria | Firmicu<br>tes | Clostridia | Lachnospirale<br>s     | Lachnospiracea<br>e     | Dorea                       |
| raber-<br>2020-<br>dss_<br>ASV1<br>94 | Bact<br>eria | Firmicu<br>tes | Clostridia | Lachnospirale<br>s     | Lachnospiracea<br>e     | Acetatifactor               |
| raber-<br>2020-<br>dss_<br>ASV1<br>95 | Bact<br>eria | Firmicu<br>tes | Clostridia | Oscillospirale<br>s    | Oscillospiracea<br>e    | NA                          |
| raber-<br>2020-<br>dss_<br>ASV1<br>96 | Bact<br>eria | Firmicu<br>tes | Bacilli    | Erysipelotrich<br>ales | Erysipelotricha<br>ceae | NA                          |
| raber-<br>2020-<br>dss_<br>ASV1<br>97 | Bact<br>eria | Firmicu<br>tes | Clostridia | Lachnospirale<br>s     | Lachnospiracea<br>e     | Marvinbryantia              |
| raber-<br>2020-<br>dss_<br>ASV1<br>98 | Bact<br>eria | Firmicu<br>tes | Clostridia | Lachnospirale<br>s     | Lachnospiracea<br>e     | A2                          |
| raber-<br>2020-<br>dss_<br>ASV1<br>99 | Bact<br>eria | Firmicu<br>tes | Clostridia | Oscillospirale<br>s    | Ruminococcace<br>ae     | NA                          |
| raber-<br>2020-<br>dss_<br>ASV2<br>00 | Bact<br>eria | Firmicu<br>tes | Clostridia | Lachnospirale<br>s     | Lachnospiracea<br>e     | Lachnospiraceae<br>_UCG-006 |

|                                       |              |                    |                             |                     |                      |                |
|---------------------------------------|--------------|--------------------|-----------------------------|---------------------|----------------------|----------------|
| raber-<br>2020-<br>dss_<br>ASV2<br>01 | Bact<br>eria | Firmicu<br>tes     | Bacilli                     | RF39                | NA                   | NA             |
| raber-<br>2020-<br>dss_<br>ASV2<br>02 | Bact<br>eria | Bacteroi<br>dota   | Bacteroidi<br>a             | Bacteroidales       | Rikenellaceae        | Rikenella      |
| raber-<br>2020-<br>dss_<br>ASV2<br>03 | Bact<br>eria | Firmicu<br>tes     | Clostridia                  | Lachnospirale<br>s  | Lachnospiracea<br>e  | NA             |
| raber-<br>2020-<br>dss_<br>ASV2<br>04 | Bact<br>eria | Proteob<br>acteria | Gammapr<br>oteobacteri<br>a | Burkholderial<br>es | Sutterellaceae       | Parasutterella |
| raber-<br>2020-<br>dss_<br>ASV2<br>05 | Bact<br>eria | Firmicu<br>tes     | Clostridia                  | Lachnospirale<br>s  | Lachnospiracea<br>e  | NA             |
| raber-<br>2020-<br>dss_<br>ASV2<br>06 | Bact<br>eria | Firmicu<br>tes     | Clostridia                  | Lachnospirale<br>s  | Lachnospiracea<br>e  | NA             |
| raber-<br>2020-<br>dss_<br>ASV2<br>07 | Bact<br>eria | Firmicu<br>tes     | Clostridia                  | Lachnospirale<br>s  | Lachnospiracea<br>e  | NA             |
| raber-<br>2020-<br>dss_<br>ASV2<br>08 | Bact<br>eria | Firmicu<br>tes     | Clostridia                  | Oscillospirale<br>s | Oscillospiracea<br>e | Oscillibacter  |

|                                       |              |                          |                      |                                    |                         |                                       |
|---------------------------------------|--------------|--------------------------|----------------------|------------------------------------|-------------------------|---------------------------------------|
| raber-<br>2020-<br>dss_<br>ASV2<br>09 | Bact<br>eria | Firmicu<br>tes           | Clostridia           | Lachnospirale<br>s                 | Lachnospiracea<br>e     | NA                                    |
| raber-<br>2020-<br>dss_<br>ASV2<br>10 | Bact<br>eria | Firmicu<br>tes           | Clostridia           | Lachnospirale<br>s                 | Lachnospiracea<br>e     | Lachnospiraceae<br>_NK4A136_grou<br>p |
| raber-<br>2020-<br>dss_<br>ASV2<br>11 | Bact<br>eria | Firmicu<br>tes           | Clostridia           | Oscillospirale<br>s                | Butyricicoccace<br>ae   | Butyricicoccus                        |
| raber-<br>2020-<br>dss_<br>ASV2<br>13 | Bact<br>eria | Desulfo<br>bacterot<br>a | Desulfovib<br>rionia | Desulfovibrio<br>nales             | Desulfovibrion<br>aceae | Bilophila                             |
| raber-<br>2020-<br>dss_<br>ASV2<br>14 | Bact<br>eria | Firmicu<br>tes           | Clostridia           | Lachnospirale<br>s                 | Lachnospiracea<br>e     | NA                                    |
| raber-<br>2020-<br>dss_<br>ASV2<br>15 | Bact<br>eria | Bacteroi<br>dota         | Bacteroidi<br>a      | Bacteroidales                      | Muribaculacea<br>e      | NA                                    |
| raber-<br>2020-<br>dss_<br>ASV2<br>16 | Bact<br>eria | Firmicu<br>tes           | Clostridia           | Oscillospirale<br>s                | Oscillospiracea<br>e    | NA                                    |
| raber-<br>2020-<br>dss_<br>ASV2<br>17 | Bact<br>eria | Firmicu<br>tes           | Clostridia           | Clostridia_va<br>dinBB60_grou<br>p | NA                      | NA                                    |

|                        |          |            |            |                   |                    |                             |
|------------------------|----------|------------|------------|-------------------|--------------------|-----------------------------|
| raber-2020-dss_ASV2_18 | Bacteria | Firmicutes | Bacilli    | Staphylococcales  | Staphylococcaceae  | Staphylococcus              |
| raber-2020-dss_ASV2_19 | Bacteria | Firmicutes | Clostridia | Lachnospirales    | Lachnospiraceae    | NA                          |
| raber-2020-dss_ASV2_20 | Bacteria | Firmicutes | Bacilli    | Acholeplasmatales | Acholeplasmataceae | Anaeroplasma                |
| raber-2020-dss_ASV2_21 | Bacteria | Firmicutes | Clostridia | Lachnospirales    | Lachnospiraceae    | Roseburia                   |
| raber-2020-dss_ASV2_22 | Bacteria | Firmicutes | Clostridia | Clostridiales     | Clostridiaceae     | Clostridium_sensu_stricto_1 |
| raber-2020-dss_ASV2_23 | Bacteria | Firmicutes | Clostridia | Lachnospirales    | Lachnospiraceae    | GCA-900066575               |
| raber-2020-dss_ASV2_24 | Bacteria | Firmicutes | Clostridia | Lachnospirales    | Lachnospiraceae    | NA                          |
| raber-2020-dss_ASV2_25 | Bacteria | Firmicutes | Clostridia | Lachnospirales    | Lachnospiraceae    | Acetatifactor               |

|                                       |              |                  |                 |                                             |                      |                             |
|---------------------------------------|--------------|------------------|-----------------|---------------------------------------------|----------------------|-----------------------------|
| raher-<br>2020-<br>dss_<br>ASV2<br>26 | Bact<br>eria | Firmicu<br>tes   | Clostridia      | Oscillospirale<br>s                         | Ruminococcace<br>ae  | NA                          |
| raher-<br>2020-<br>dss_<br>ASV2<br>27 | Bact<br>eria | Bacteroi<br>dota | Bacteroidi<br>a | Bacteroidales                               | Muribaculacea<br>e   | NA                          |
| raher-<br>2020-<br>dss_<br>ASV2<br>28 | Bact<br>eria | Firmicu<br>tes   | Clostridia      | Peptostreptoc<br>occales-<br>Tissierellales | Anaerovoracac<br>eae | NA                          |
| raher-<br>2020-<br>dss_<br>ASV2<br>29 | Bact<br>eria | Firmicu<br>tes   | Clostridia      | Clostridia_va<br>dinBB60_grou<br>p          | NA                   | NA                          |
| raher-<br>2020-<br>dss_<br>ASV2<br>30 | Bact<br>eria | Firmicu<br>tes   | Clostridia      | Oscillospirale<br>s                         | Oscillospiracea<br>e | UCG-003                     |
| raher-<br>2020-<br>dss_<br>ASV2<br>31 | Bact<br>eria | Firmicu<br>tes   | Clostridia      | Lachnospirale<br>s                          | Lachnospiracea<br>e  | Lachnoclostridiu<br>m       |
| raher-<br>2020-<br>dss_<br>ASV2<br>32 | Bact<br>eria | Firmicu<br>tes   | Clostridia      | Lachnospirale<br>s                          | Lachnospiracea<br>e  | NA                          |
| raher-<br>2020-<br>dss_<br>ASV2<br>33 | Bact<br>eria | Firmicu<br>tes   | Clostridia      | Lachnospirale<br>s                          | Lachnospiracea<br>e  | Lachnospiraceae<br>_UCG-001 |

|                 |      |          |               |                  |                     |                 |                               |
|-----------------|------|----------|---------------|------------------|---------------------|-----------------|-------------------------------|
| raber-2020-dss_ | ASV2 | Bacteria | Firmicutes    | Clostridia       | Lachnospirales      | Lachnospiraceae | NA                            |
| raber-2020-dss_ | ASV2 | Bacteria | Firmicutes    | Clostridia       | Lachnospirales      | Lachnospiraceae | Lachnospiraceae_NK4A136_group |
| raber-2020-dss_ | ASV2 | Bacteria | Cyanobacteria | Vampirivibrionia | Gastranaerophilales | NA              | NA                            |
| raber-2020-dss_ | ASV2 | Bacteria | Firmicutes    | Clostridia       | Lachnospirales      | Lachnospiraceae | Lachnospiraceae_NK4A136_group |
| raber-2020-dss_ | ASV2 | Bacteria | Firmicutes    | Clostridia       | Clostridia_UCG-014  | NA              | NA                            |
| raber-2020-dss_ | ASV2 | Bacteria | Firmicutes    | Clostridia       | Lachnospirales      | Lachnospiraceae | NA                            |
| raber-2020-dss_ | ASV2 | Bacteria | Bacteroidota  | Bacteroidia      | Bacteroidales       | Muribaculaceae  | NA                            |
| raber-2020-dss_ | ASV2 | Bacteria | Bacteroidota  | Bacteroidia      | Bacteroidales       | Muribaculaceae  | NA                            |

|                                       |              |                          |                      |                         |                         |                       |
|---------------------------------------|--------------|--------------------------|----------------------|-------------------------|-------------------------|-----------------------|
| raher-<br>2020-<br>dss_<br>ASV2<br>42 | Bact<br>eria | Actinob<br>acteriot<br>a | Coriobacte<br>riia   | Coriobacterial<br>es    | Eggerthellacea<br>e     | Adlercreutzia         |
| raher-<br>2020-<br>dss_<br>ASV2<br>43 | Bact<br>eria | Firmicu<br>tes           | Clostridia           | Clostridia_UC<br>G-014  | NA                      | NA                    |
| raher-<br>2020-<br>dss_<br>ASV2<br>44 | Bact<br>eria | Firmicu<br>tes           | Clostridia           | Lachnospirale<br>s      | Lachnospiracea<br>e     | Lachnoclostridiu<br>m |
| raher-<br>2020-<br>dss_<br>ASV2<br>45 | Bact<br>eria | Firmicu<br>tes           | Bacilli              | Erysipelotrich<br>ales  | Erysipelotricha<br>ceae | Faecalibaculum        |
| raher-<br>2020-<br>dss_<br>ASV2<br>46 | Bact<br>eria | Cyanob<br>acteria        | Vampirivi<br>brionia | Gastranaerop<br>hilales | NA                      | NA                    |
| raher-<br>2020-<br>dss_<br>ASV2<br>47 | Bact<br>eria | Firmicu<br>tes           | Clostridia           | Lachnospirale<br>s      | Lachnospiracea<br>e     | Roseburia             |
| raher-<br>2020-<br>dss_<br>ASV2<br>48 | Bact<br>eria | Bacteroi<br>dota         | Bacteroidi<br>a      | Bacteroidales           | Rikenellaceae           | Rikenella             |
| raher-<br>2020-<br>dss_<br>ASV2<br>49 | Bact<br>eria | Firmicu<br>tes           | Clostridia           | Oscillospirale<br>s     | Oscillospiracea<br>e    | Colidextribacter      |

|                                       |              |                          |                    |                                             |                      |                                       |
|---------------------------------------|--------------|--------------------------|--------------------|---------------------------------------------|----------------------|---------------------------------------|
| raber-<br>2020-<br>dss_<br>ASV2<br>50 | Bact<br>eria | Firmicu<br>tes           | Clostridia         | Lachnospirale<br>s                          | Lachnospiracea<br>e  | Lachnospiraceae<br>_NK4A136_grou<br>p |
| raber-<br>2020-<br>dss_<br>ASV2<br>51 | Bact<br>eria | Firmicu<br>tes           | Clostridia         | Oscillospirale<br>s                         | Oscillospiracea<br>e | Colidextribacter                      |
| raber-<br>2020-<br>dss_<br>ASV2<br>52 | Bact<br>eria | Actinob<br>acteriot<br>a | Coriobacte<br>riia | Coriobacterial<br>es                        | Eggerthellacea<br>e  | Enterorhabdus                         |
| raber-<br>2020-<br>dss_<br>ASV2<br>53 | Bact<br>eria | Bacteroi<br>dota         | Bacteroidi<br>a    | Bacteroidales                               | Muribaculacea<br>e   | NA                                    |
| raber-<br>2020-<br>dss_<br>ASV2<br>54 | Bact<br>eria | Firmicu<br>tes           | Clostridia         | Lachnospirale<br>s                          | Lachnospiracea<br>e  | Lachnospiraceae<br>_NK4A136_grou<br>p |
| raber-<br>2020-<br>dss_<br>ASV2<br>55 | Bact<br>eria | Bacteroi<br>dota         | Bacteroidi<br>a    | Bacteroidales                               | Muribaculacea<br>e   | NA                                    |
| raber-<br>2020-<br>dss_<br>ASV2<br>56 | Bact<br>eria | Firmicu<br>tes           | Clostridia         | Peptostreptoc<br>occales-<br>Tissierellales | Anaerovoracac<br>eae | NA                                    |
| raber-<br>2020-<br>dss_<br>ASV2<br>57 | Bact<br>eria | Firmicu<br>tes           | Clostridia         | Lachnospirale<br>s                          | Lachnospiracea<br>e  | Lachnospiraceae<br>_NK4A136_grou<br>p |

|                                       |              |                  |                 |                                    |                      |                |
|---------------------------------------|--------------|------------------|-----------------|------------------------------------|----------------------|----------------|
| raber-<br>2020-<br>dss_<br>ASV2<br>58 | Bact<br>eria | Firmicu<br>tes   | Bacilli         | Lactobacillale<br>s                | Lactobacillacea<br>e | Lactobacillus  |
| raber-<br>2020-<br>dss_<br>ASV2<br>59 | Bact<br>eria | Bacteroi<br>dota | Bacteroidi<br>a | Bacteroidales                      | Muribaculacea<br>e   | NA             |
| raber-<br>2020-<br>dss_<br>ASV2<br>60 | Bact<br>eria | Firmicu<br>tes   | Clostridia      | Clostridia_UC<br>G-014             | NA                   | NA             |
| raber-<br>2020-<br>dss_<br>ASV2<br>61 | Bact<br>eria | Firmicu<br>tes   | Clostridia      | Oscillospirale<br>s                | Ruminococcace<br>ae  | Paludicola     |
| raber-<br>2020-<br>dss_<br>ASV2<br>63 | Bact<br>eria | Firmicu<br>tes   | Clostridia      | Oscillospirale<br>s                | Oscillospiracea<br>e | Intestinimonas |
| raber-<br>2020-<br>dss_<br>ASV2<br>64 | Bact<br>eria | Firmicu<br>tes   | Clostridia      | Clostridia_va<br>dinBB60_grou<br>p | NA                   | NA             |
| raber-<br>2020-<br>dss_<br>ASV2<br>65 | Bact<br>eria | Firmicu<br>tes   | Clostridia      | Clostridia_UC<br>G-014             | NA                   | NA             |
| raber-<br>2020-<br>dss_<br>ASV2<br>66 | Bact<br>eria | Bacteroi<br>dota | Bacteroidi<br>a | Bacteroidales                      | Muribaculacea<br>e   | NA             |

|                                       |              |                    |                             |                     |                      |                             |
|---------------------------------------|--------------|--------------------|-----------------------------|---------------------|----------------------|-----------------------------|
| raher-<br>2020-<br>dss_<br>ASV2<br>67 | Bact<br>eria | Firmicu<br>tes     | Clostridia                  | Oscillospirale<br>s | Oscillospiracea<br>e | Oscillibacter               |
| raher-<br>2020-<br>dss_<br>ASV2<br>68 | Bact<br>eria | Firmicu<br>tes     | Clostridia                  | Lachnospirale<br>s  | Lachnospiracea<br>e  | UC5-1-2E3                   |
| raher-<br>2020-<br>dss_<br>ASV2<br>69 | Bact<br>eria | Bacteroi<br>dota   | Bacteroidi<br>a             | Bacteroidales       | Muribaculacea<br>e   | NA                          |
| raher-<br>2020-<br>dss_<br>ASV2<br>70 | Bact<br>eria | Proteob<br>acteria | Gammapr<br>oteobacteri<br>a | Burkholderial<br>es | Sutterellaceae       | Parasutterella              |
| raher-<br>2020-<br>dss_<br>ASV2<br>71 | Bact<br>eria | Firmicu<br>tes     | Clostridia                  | Oscillospirale<br>s | Oscillospiracea<br>e | Oscillibacter               |
| raher-<br>2020-<br>dss_<br>ASV2<br>72 | Bact<br>eria | Firmicu<br>tes     | Clostridia                  | Lachnospirale<br>s  | Lachnospiracea<br>e  | Lachnospiraceae<br>_UCG-010 |
| raher-<br>2020-<br>dss_<br>ASV2<br>73 | Bact<br>eria | Firmicu<br>tes     | Clostridia                  | Lachnospirale<br>s  | Lachnospiracea<br>e  | Acetatifactor               |
| raher-<br>2020-<br>dss_<br>ASV2<br>74 | Bact<br>eria | Bacteroi<br>dota   | Bacteroidi<br>a             | Bacteroidales       | Muribaculacea<br>e   | NA                          |

|                                       |              |                          |                    |                                    |                         |                                       |
|---------------------------------------|--------------|--------------------------|--------------------|------------------------------------|-------------------------|---------------------------------------|
| raber-<br>2020-<br>dss_<br>ASV2<br>75 | Bact<br>eria | Bacteroi<br>dota         | Bacteroidi<br>a    | Bacteroidales                      | Muribaculacea<br>e      | NA                                    |
| raber-<br>2020-<br>dss_<br>ASV2<br>76 | Bact<br>eria | Firmicu<br>tes           | Bacilli            | Staphylococca<br>les               | Staphylococcac<br>eae   | Jeotgalicoccus                        |
| raber-<br>2020-<br>dss_<br>ASV2<br>77 | Bact<br>eria | Firmicu<br>tes           | Bacilli            | Erysipelotrich<br>ales             | Erysipelotricha<br>ceae | Dubosiella                            |
| raber-<br>2020-<br>dss_<br>ASV2<br>78 | Bact<br>eria | Firmicu<br>tes           | Clostridia         | Lachnospirale<br>s                 | Lachnospiracea<br>e     | NA                                    |
| raber-<br>2020-<br>dss_<br>ASV2<br>80 | Bact<br>eria | Firmicu<br>tes           | Bacilli            | Lactobacillale<br>s                | Lactobacillacea<br>e    | Lactobacillus                         |
| raber-<br>2020-<br>dss_<br>ASV2<br>81 | Bact<br>eria | Actinob<br>acteriot<br>a | Coriobacte<br>riia | Coriobacterial<br>es               | Eggerthellacea<br>e     | DNF00809                              |
| raber-<br>2020-<br>dss_<br>ASV2<br>82 | Bact<br>eria | Firmicu<br>tes           | Clostridia         | Clostridia_va<br>dinBB60_grou<br>p | NA                      | NA                                    |
| raber-<br>2020-<br>dss_<br>ASV2<br>83 | Bact<br>eria | Firmicu<br>tes           | Clostridia         | Lachnospirale<br>s                 | Lachnospiracea<br>e     | Lachnospiraceae<br>_NK4A136_grou<br>p |

|                                       |              |                |            |                                         |                      |                              |
|---------------------------------------|--------------|----------------|------------|-----------------------------------------|----------------------|------------------------------|
| raher-<br>2020-<br>dss_<br>ASV2<br>84 | Bact<br>eria | Firmicu<br>tes | Clostridia | Oscillospirale<br>s                     | Ruminococcace<br>ae  | Anaerotruncus                |
| raher-<br>2020-<br>dss_<br>ASV2<br>85 | Bact<br>eria | Firmicu<br>tes | Clostridia | Lachnospirale<br>s                      | Lachnospiracea<br>e  | Marvinbryantia               |
| raher-<br>2020-<br>dss_<br>ASV2<br>86 | Bact<br>eria | Firmicu<br>tes | Clostridia | Oscillospirale<br>s                     | Oscillospiracea<br>e | NK4A214_group                |
| raher-<br>2020-<br>dss_<br>ASV2<br>87 | Bact<br>eria | Firmicu<br>tes | Clostridia | Peptococcales                           | Peptococcaceae       | NA                           |
| raher-<br>2020-<br>dss_<br>ASV2<br>89 | Bact<br>eria | Firmicu<br>tes | Clostridia | Lachnospirale<br>s                      | Lachnospiracea<br>e  | NA                           |
| raher-<br>2020-<br>dss_<br>ASV2<br>90 | Bact<br>eria | Firmicu<br>tes | Clostridia | Peptostreptococcales-<br>Tissierellales | Anaerovoracaceae     | Family_XIII_AD<br>3011_group |
| raher-<br>2020-<br>dss_<br>ASV2<br>91 | Bact<br>eria | Firmicu<br>tes | Bacilli    | RF39                                    | NA                   | NA                           |
| raher-<br>2020-<br>dss_<br>ASV2<br>92 | Bact<br>eria | Firmicu<br>tes | Bacilli    | Lactobacillales                         | Lactobacillaceae     | Lactobacillus                |

|                 |      |          |            |            |                    |                     |                   |
|-----------------|------|----------|------------|------------|--------------------|---------------------|-------------------|
| raber-2020-dss_ | ASV2 | Bacteria | Firmicutes | Bacilli    | Erysipelotrichales | Erysipelotrichaceae | NA                |
| raber-2020-dss_ | ASV2 | Bacteria | Firmicutes | Clostridia | Lachnospirales     | Lachnospiraceae     | Lachnoclostridium |
| raber-2020-dss_ | ASV2 | Bacteria | Firmicutes | Clostridia | Oscillospirales    | Oscillospiraceae    | Colidextribacter  |
| raber-2020-dss_ | ASV2 | Bacteria | Firmicutes | Clostridia | Lachnospirales     | Lachnospiraceae     | NA                |
| raber-2020-dss_ | ASV2 | Bacteria | Firmicutes | Bacilli    | RF39               | NA                  | NA                |
| raber-2020-dss_ | ASV2 | Bacteria | Firmicutes | Clostridia | Lachnospirales     | Lachnospiraceae     | GCA-900066575     |
| raber-2020-dss_ | ASV3 | Bacteria | Firmicutes | Clostridia | Lachnospirales     | Lachnospiraceae     | Lachnoclostridium |
| raber-2020-dss_ | ASV3 | Bacteria | Firmicutes | Clostridia | Lachnospirales     | Lachnospiraceae     | Marvinbryantia    |

|                                       |              |                  |                 |                                    |                         |                                       |
|---------------------------------------|--------------|------------------|-----------------|------------------------------------|-------------------------|---------------------------------------|
| raber-<br>2020-<br>dss_<br>ASV3<br>02 | Bact<br>eria | Firmicu<br>tes   | Bacilli         | Erysipelotrich<br>ales             | Erysipelotricha<br>ceae | NA                                    |
| raber-<br>2020-<br>dss_<br>ASV3<br>03 | Bact<br>eria | Firmicu<br>tes   | Clostridia      | Lachnospirale<br>s                 | Lachnospiracea<br>e     | NA                                    |
| raber-<br>2020-<br>dss_<br>ASV3<br>04 | Bact<br>eria | Firmicu<br>tes   | Clostridia      | Lachnospirale<br>s                 | Lachnospiracea<br>e     | Roseburia                             |
| raber-<br>2020-<br>dss_<br>ASV3<br>05 | Bact<br>eria | Firmicu<br>tes   | Clostridia      | Clostridia_va<br>dinBB60_grou<br>p | NA                      | NA                                    |
| raber-<br>2020-<br>dss_<br>ASV3<br>06 | Bact<br>eria | Bacteroi<br>dota | Bacteroidi<br>a | Bacteroidales                      | Rikenellaceae           | Alistipes                             |
| raber-<br>2020-<br>dss_<br>ASV3<br>07 | Bact<br>eria | Bacteroi<br>dota | Bacteroidi<br>a | Bacteroidales                      | Marinifilaceae          | Odoribacter                           |
| raber-<br>2020-<br>dss_<br>ASV3<br>08 | Bact<br>eria | Firmicu<br>tes   | Clostridia      | Lachnospirale<br>s                 | Lachnospiracea<br>e     | Lachnospiraceae<br>_NK4A136_grou<br>p |
| raber-<br>2020-<br>dss_<br>ASV3<br>09 | Bact<br>eria | Bacteroi<br>dota | Bacteroidi<br>a | Bacteroidales                      | Muribaculacea<br>e      | NA                                    |

|                        |          |              |             |                            |                 |                               |
|------------------------|----------|--------------|-------------|----------------------------|-----------------|-------------------------------|
| raber-2020-dss_ASV3 10 | Bacteria | Bacteroidota | Bacteroidia | Bacteroidales              | Marinifilaceae  | Odoribacter                   |
| raber-2020-dss_ASV3 11 | Bacteria | Firmicutes   | Clostridia  | Oscillospirales            | Ruminococcaceae | Incertae_Sedis                |
| raber-2020-dss_ASV3 12 | Bacteria | Firmicutes   | Clostridia  | Clostridia_vadinBB60_group | NA              | NA                            |
| raber-2020-dss_ASV3 13 | Bacteria | Firmicutes   | Clostridia  | NA                         | NA              | NA                            |
| raber-2020-dss_ASV3 15 | Bacteria | Bacteroidota | Bacteroidia | Bacteroidales              | Bacteroidaceae  | Bacteroides                   |
| raber-2020-dss_ASV3 16 | Bacteria | Firmicutes   | Clostridia  | Lachnospirales             | Lachnospiraceae | NA                            |
| raber-2020-dss_ASV3 17 | Bacteria | Firmicutes   | Clostridia  | Lachnospirales             | Lachnospiraceae | Lachnospiraceae_NK4A136_group |
| raber-2020-dss_ASV3 18 | Bacteria | Firmicutes   | Clostridia  | Clostridia_UCG-014         | NA              | NA                            |

|                                       |              |                  |                 |                        |                     |                                       |
|---------------------------------------|--------------|------------------|-----------------|------------------------|---------------------|---------------------------------------|
| raber-<br>2020-<br>dss_<br>ASV3<br>19 | Bact<br>eria | Bacteroi<br>dota | Bacteroidi<br>a | Bacteroidales          | Muribaculacea<br>e  | NA                                    |
| raber-<br>2020-<br>dss_<br>ASV3<br>20 | Bact<br>eria | Bacteroi<br>dota | Bacteroidi<br>a | Bacteroidales          | Muribaculacea<br>e  | NA                                    |
| raber-<br>2020-<br>dss_<br>ASV3<br>21 | Bact<br>eria | Bacteroi<br>dota | Bacteroidi<br>a | Bacteroidales          | Muribaculacea<br>e  | NA                                    |
| raber-<br>2020-<br>dss_<br>ASV3<br>22 | Bact<br>eria | Bacteroi<br>dota | Bacteroidi<br>a | Bacteroidales          | Muribaculacea<br>e  | NA                                    |
| raber-<br>2020-<br>dss_<br>ASV3<br>23 | Bact<br>eria | Firmicu<br>tes   | Clostridia      | Lachnospirale<br>s     | Lachnospiracea<br>e | Lachnospiraceae<br>_NK4A136_grou<br>p |
| raber-<br>2020-<br>dss_<br>ASV3<br>24 | Bact<br>eria | Firmicu<br>tes   | Clostridia      | Lachnospirale<br>s     | Lachnospiracea<br>e | Lachnospiraceae<br>_UCG-006           |
| raber-<br>2020-<br>dss_<br>ASV3<br>25 | Bact<br>eria | Firmicu<br>tes   | Clostridia      | Clostridia_UC<br>G-014 | NA                  | NA                                    |
| raber-<br>2020-<br>dss_<br>ASV3<br>26 | Bact<br>eria | Firmicu<br>tes   | Bacilli         | Lactobacillale<br>s    | Enterococcacea<br>e | Enterococcus                          |

|                                       |              |                |            |                                    |                      |                             |
|---------------------------------------|--------------|----------------|------------|------------------------------------|----------------------|-----------------------------|
| raher-<br>2020-<br>dss_<br>ASV3<br>27 | Bact<br>eria | Firmicu<br>tes | Clostridia | Lachnospirale<br>s                 | Lachnospiracea<br>e  | GCA-900066575               |
| raher-<br>2020-<br>dss_<br>ASV3<br>28 | Bact<br>eria | Firmicu<br>tes | Clostridia | Clostridia_v<br>adinBB60_grou<br>p | NA                   | NA                          |
| raher-<br>2020-<br>dss_<br>ASV3<br>29 | Bact<br>eria | Firmicu<br>tes | Clostridia | Clostridia_UC<br>G-014             | NA                   | NA                          |
| raher-<br>2020-<br>dss_<br>ASV3<br>30 | Bact<br>eria | Firmicu<br>tes | Clostridia | Oscillospirale<br>s                | Oscillospiracea<br>e | NA                          |
| raher-<br>2020-<br>dss_<br>ASV3<br>31 | Bact<br>eria | Firmicu<br>tes | Clostridia | Lachnospirale<br>s                 | Lachnospiracea<br>e  | Lachnospiraceae<br>_UCG-004 |
| raher-<br>2020-<br>dss_<br>ASV3<br>32 | Bact<br>eria | Firmicu<br>tes | Clostridia | Oscillospirale<br>s                | Ruminococcace<br>ae  | Incertae_Sedis              |
| raher-<br>2020-<br>dss_<br>ASV3<br>33 | Bact<br>eria | Firmicu<br>tes | Clostridia | Oscillospirale<br>s                | Oscillospiracea<br>e | NA                          |
| raher-<br>2020-<br>dss_<br>ASV3<br>34 | Bact<br>eria | Firmicu<br>tes | Clostridia | Clostridia_v<br>adinBB60_grou<br>p | NA                   | NA                          |

|                                       |              |                |            |                        |                      |                                       |
|---------------------------------------|--------------|----------------|------------|------------------------|----------------------|---------------------------------------|
| raher-<br>2020-<br>dss_<br>ASV3<br>35 | Bact<br>eria | Firmicu<br>tes | Clostridia | Lachnospirale<br>s     | Lachnospiracea<br>e  | NA                                    |
| raher-<br>2020-<br>dss_<br>ASV3<br>36 | Bact<br>eria | Firmicu<br>tes | Clostridia | Oscillospirale<br>s    | Oscillospiracea<br>e | NA                                    |
| raher-<br>2020-<br>dss_<br>ASV3<br>37 | Bact<br>eria | Firmicu<br>tes | Clostridia | Clostridia_UC<br>G-014 | NA                   | NA                                    |
| raher-<br>2020-<br>dss_<br>ASV3<br>38 | Bact<br>eria | Firmicu<br>tes | Clostridia | Lachnospirale<br>s     | Lachnospiracea<br>e  | Lachnospiraceae<br>_NK4A136_grou<br>p |
| raher-<br>2020-<br>dss_<br>ASV3<br>39 | Bact<br>eria | Firmicu<br>tes | Clostridia | Lachnospirale<br>s     | Lachnospiracea<br>e  | Lachnospiraceae<br>_UCG-006           |
| raher-<br>2020-<br>dss_<br>ASV3<br>40 | Bact<br>eria | Firmicu<br>tes | Clostridia | Oscillospirale<br>s    | Oscillospiracea<br>e | Colidextribacter                      |
| raher-<br>2020-<br>dss_<br>ASV3<br>41 | Bact<br>eria | Firmicu<br>tes | Clostridia | Oscillospirale<br>s    | Oscillospiracea<br>e | NA                                    |
| raher-<br>2020-<br>dss_<br>ASV3<br>42 | Bact<br>eria | Firmicu<br>tes | Clostridia | Lachnospirale<br>s     | Lachnospiracea<br>e  | NA                                    |

|                                        |              |                  |                 |                        |                      |                       |
|----------------------------------------|--------------|------------------|-----------------|------------------------|----------------------|-----------------------|
| raiber-<br>2020-<br>dss_<br>ASV3<br>43 | Bact<br>eria | Firmicu<br>tes   | Clostridia      | Oscillospirale<br>s    | Oscillospiracea<br>e | Oscillibacter         |
| raiber-<br>2020-<br>dss_<br>ASV3<br>44 | Bact<br>eria | Firmicu<br>tes   | Clostridia      | Lachnospirale<br>s     | Lachnospiracea<br>e  | Acetatifactor         |
| raiber-<br>2020-<br>dss_<br>ASV3<br>45 | Bact<br>eria | Bacteroi<br>dota | Bacteroidi<br>a | Bacteroidales          | Muribaculacea<br>e   | NA                    |
| raiber-<br>2020-<br>dss_<br>ASV3<br>46 | Bact<br>eria | Bacteroi<br>dota | Bacteroidi<br>a | Bacteroidales          | Rikenellaceae        | Rikenella             |
| raiber-<br>2020-<br>dss_<br>ASV3<br>47 | Bact<br>eria | Firmicu<br>tes   | Clostridia      | Lachnospirale<br>s     | Lachnospiracea<br>e  | Lachnoclostridiu<br>m |
| raiber-<br>2020-<br>dss_<br>ASV3<br>48 | Bact<br>eria | Bacteroi<br>dota | Bacteroidi<br>a | Bacteroidales          | Muribaculacea<br>e   | NA                    |
| raiber-<br>2020-<br>dss_<br>ASV3<br>49 | Bact<br>eria | Bacteroi<br>dota | Bacteroidi<br>a | Bacteroidales          | Muribaculacea<br>e   | NA                    |
| raiber-<br>2020-<br>dss_<br>ASV3<br>50 | Bact<br>eria | Firmicu<br>tes   | Clostridia      | Clostridia_UC<br>G-014 | NA                   | NA                    |

|                                       |              |                          |                    |                        |                         |                                       |
|---------------------------------------|--------------|--------------------------|--------------------|------------------------|-------------------------|---------------------------------------|
| raber-<br>2020-<br>dss_<br>ASV3<br>51 | Bact<br>eria | Firmicu<br>tes           | Clostridia         | Lachnospirale<br>s     | Lachnospiracea<br>e     | Lachnospiraceae<br>_NK4A136_grou<br>p |
| raber-<br>2020-<br>dss_<br>ASV3<br>52 | Bact<br>eria | Firmicu<br>tes           | Clostridia         | Lachnospirale<br>s     | Lachnospiracea<br>e     | A2                                    |
| raber-<br>2020-<br>dss_<br>ASV3<br>53 | Bact<br>eria | Firmicu<br>tes           | Bacilli            | Erysipelotrich<br>ales | Erysipelotricha<br>ceae | Breznakia                             |
| raber-<br>2020-<br>dss_<br>ASV3<br>54 | Bact<br>eria | Firmicu<br>tes           | Clostridia         | Lachnospirale<br>s     | Lachnospiracea<br>e     | Lachnospiraceae<br>_NK4A136_grou<br>p |
| raber-<br>2020-<br>dss_<br>ASV3<br>55 | Bact<br>eria | Actinob<br>acteriot<br>a | Coriobacte<br>riia | Coriobacterial<br>es   | Eggerthellacea<br>e     | NA                                    |
| raber-<br>2020-<br>dss_<br>ASV3<br>56 | Bact<br>eria | Bacteroi<br>dota         | Bacteroidi<br>a    | Bacteroidales          | Rikenellaceae           | Alistipes                             |
| raber-<br>2020-<br>dss_<br>ASV3<br>57 | Bact<br>eria | Firmicu<br>tes           | Bacilli            | Erysipelotrich<br>ales | Erysipelotricha<br>ceae | NA                                    |
| raber-<br>2020-<br>dss_<br>ASV3<br>58 | Bact<br>eria | Firmicu<br>tes           | Clostridia         | Lachnospirale<br>s     | Lachnospiracea<br>e     | NA                                    |

|                                       |              |                |            |                                    |                      |                                       |
|---------------------------------------|--------------|----------------|------------|------------------------------------|----------------------|---------------------------------------|
| raher-<br>2020-<br>dss_<br>ASV3<br>59 | Bact<br>eria | Firmicu<br>tes | Clostridia | Lachnospirale<br>s                 | Lachnospiracea<br>e  | Lachnospiraceae<br>_NK4A136_grou<br>p |
| raher-<br>2020-<br>dss_<br>ASV3<br>60 | Bact<br>eria | Firmicu<br>tes | Clostridia | Oscillospirale<br>s                | Ruminococcace<br>ae  | NA                                    |
| raher-<br>2020-<br>dss_<br>ASV3<br>61 | Bact<br>eria | Firmicu<br>tes | Clostridia | Clostridia_va<br>dinBB60_grou<br>p | NA                   | NA                                    |
| raher-<br>2020-<br>dss_<br>ASV3<br>62 | Bact<br>eria | Firmicu<br>tes | Clostridia | Lachnospirale<br>s                 | Lachnospiracea<br>e  | Lachnoclostridiu<br>m                 |
| raher-<br>2020-<br>dss_<br>ASV3<br>63 | Bact<br>eria | Firmicu<br>tes | Clostridia | Lachnospirale<br>s                 | Lachnospiracea<br>e  | Lachnoclostridiu<br>m                 |
| raher-<br>2020-<br>dss_<br>ASV3<br>64 | Bact<br>eria | Firmicu<br>tes | Clostridia | Lachnospirale<br>s                 | Lachnospiracea<br>e  | Roseburia                             |
| raher-<br>2020-<br>dss_<br>ASV3<br>65 | Bact<br>eria | Firmicu<br>tes | Clostridia | Lachnospirale<br>s                 | Lachnospiracea<br>e  | Lachnospiraceae<br>_NK4A136_grou<br>p |
| raher-<br>2020-<br>dss_<br>ASV3<br>66 | Bact<br>eria | Firmicu<br>tes | Clostridia | Oscillospirale<br>s                | Oscillospiracea<br>e | NA                                    |

|                                       |              |                |            |                                    |                     |                       |
|---------------------------------------|--------------|----------------|------------|------------------------------------|---------------------|-----------------------|
| raber-<br>2020-<br>dss_<br>ASV3<br>67 | Bact<br>eria | Firmicu<br>tes | Clostridia | Lachnospirale<br>s                 | Lachnospiracea<br>e | NA                    |
| raber-<br>2020-<br>dss_<br>ASV3<br>68 | Bact<br>eria | Firmicu<br>tes | Bacilli    | RF39                               | NA                  | NA                    |
| raber-<br>2020-<br>dss_<br>ASV3<br>69 | Bact<br>eria | Firmicu<br>tes | Clostridia | Clostridia_UC<br>G-014             | NA                  | NA                    |
| raber-<br>2020-<br>dss_<br>ASV3<br>70 | Bact<br>eria | Firmicu<br>tes | Clostridia | Lachnospirale<br>s                 | Lachnospiracea<br>e | Lachnoclostridiu<br>m |
| raber-<br>2020-<br>dss_<br>ASV3<br>71 | Bact<br>eria | Firmicu<br>tes | Clostridia | Clostridia_va<br>dinBB60_grou<br>p | NA                  | NA                    |
| raber-<br>2020-<br>dss_<br>ASV3<br>72 | Bact<br>eria | Firmicu<br>tes | Bacilli    | RF39                               | NA                  | NA                    |
| raber-<br>2020-<br>dss_<br>ASV3<br>73 | Bact<br>eria | Firmicu<br>tes | Clostridia | Oscillospirale<br>s                | Ruminococcace<br>ae | Incertae_Sedis        |
| raber-<br>2020-<br>dss_<br>ASV3<br>74 | Bact<br>eria | Firmicu<br>tes | Clostridia | Lachnospirale<br>s                 | Lachnospiracea<br>e | NA                    |

|                                       |              |                |            |                        |                      |                                       |
|---------------------------------------|--------------|----------------|------------|------------------------|----------------------|---------------------------------------|
| raber-<br>2020-<br>dss_<br>ASV3<br>75 | Bact<br>eria | Firmicu<br>tes | Clostridia | Oscillospirale<br>s    | Oscillospiracea<br>e | Colidextribacter                      |
| raber-<br>2020-<br>dss_<br>ASV3<br>76 | Bact<br>eria | Firmicu<br>tes | Bacilli    | Lactobacillale<br>s    | Lactobacillacea<br>e | Lactobacillus                         |
| raber-<br>2020-<br>dss_<br>ASV3<br>77 | Bact<br>eria | Firmicu<br>tes | Clostridia | Oscillospirale<br>s    | Ruminococcace<br>ae  | NA                                    |
| raber-<br>2020-<br>dss_<br>ASV3<br>78 | Bact<br>eria | Firmicu<br>tes | Clostridia | Lachnospirale<br>s     | Lachnospiracea<br>e  | Lachnospiraceae<br>_NK4A136_grou<br>p |
| raber-<br>2020-<br>dss_<br>ASV3<br>79 | Bact<br>eria | Firmicu<br>tes | Clostridia | Oscillospirale<br>s    | Oscillospiracea<br>e | Colidextribacter                      |
| raber-<br>2020-<br>dss_<br>ASV3<br>80 | Bact<br>eria | Firmicu<br>tes | Bacilli    | Lactobacillale<br>s    | Lactobacillacea<br>e | Lactobacillus                         |
| raber-<br>2020-<br>dss_<br>ASV3<br>81 | Bact<br>eria | Firmicu<br>tes | Clostridia | Clostridia_UC<br>G-014 | NA                   | NA                                    |
| raber-<br>2020-<br>dss_<br>ASV3<br>82 | Bact<br>eria | Firmicu<br>tes | Clostridia | Lachnospirale<br>s     | Lachnospiracea<br>e  | Lachnospiraceae<br>_NK4A136_grou<br>p |

|                                       |              |                          |                    |                                             |                      |                         |
|---------------------------------------|--------------|--------------------------|--------------------|---------------------------------------------|----------------------|-------------------------|
| raher-<br>2020-<br>dss_<br>ASV3<br>83 | Bact<br>eria | Firmicu<br>tes           | Clostridia         | Oscillospirale<br>s                         | Oscillospiracea<br>e | Colidextribacter        |
| raher-<br>2020-<br>dss_<br>ASV3<br>84 | Bact<br>eria | Actinob<br>acteriot<br>a | Coriobacte<br>riia | Coriobacterial<br>es                        | Eggerthellacea<br>e  | NA                      |
| raher-<br>2020-<br>dss_<br>ASV3<br>85 | Bact<br>eria | Firmicu<br>tes           | Clostridia         | Clostridia_UC<br>G-014                      | NA                   | NA                      |
| raher-<br>2020-<br>dss_<br>ASV3<br>86 | Bact<br>eria | Firmicu<br>tes           | Clostridia         | Lachnospirale<br>s                          | Lachnospiracea<br>e  | Lachnoclostridiu<br>m   |
| raher-<br>2020-<br>dss_<br>ASV3<br>87 | Bact<br>eria | Firmicu<br>tes           | Clostridia         | Peptostreptoc<br>occales-<br>Tissierellales | Anaerovoracac<br>eae | Family_XIII_UC<br>G-001 |
| raher-<br>2020-<br>dss_<br>ASV3<br>88 | Bact<br>eria | Bacteroi<br>dota         | Bacteroidi<br>a    | Bacteroidales                               | Muribaculacea<br>e   | NA                      |
| raher-<br>2020-<br>dss_<br>ASV3<br>89 | Bact<br>eria | Firmicu<br>tes           | Clostridia         | Oscillospirale<br>s                         | Oscillospiracea<br>e | NK4A214_group           |
| raher-<br>2020-<br>dss_<br>ASV3<br>90 | Bact<br>eria | Firmicu<br>tes           | Clostridia         | Oscillospirale<br>s                         | Ruminococcace<br>ae  | NA                      |

|                                       |              |                          |                    |                                    |                        |                 |
|---------------------------------------|--------------|--------------------------|--------------------|------------------------------------|------------------------|-----------------|
| raher-<br>2020-<br>dss_<br>ASV3<br>91 | Bact<br>eria | Firmicu<br>tes           | Clostridia         | Lachnospirale<br>s                 | Lachnospiracea<br>e    | NA              |
| raher-<br>2020-<br>dss_<br>ASV3<br>93 | Bact<br>eria | Firmicu<br>tes           | Clostridia         | Peptococcales                      | Peptococcaceae         | NA              |
| raher-<br>2020-<br>dss_<br>ASV3<br>94 | Bact<br>eria | Actinob<br>acteriot<br>a | Actinobact<br>eria | Bifidobacteria<br>les              | Bifidobacteriac<br>eae | Bifidobacterium |
| raher-<br>2020-<br>dss_<br>ASV3<br>95 | Bact<br>eria | Firmicu<br>tes           | Clostridia         | Lachnospirale<br>s                 | Lachnospiracea<br>e    | NA              |
| raher-<br>2020-<br>dss_<br>ASV3<br>96 | Bact<br>eria | Firmicu<br>tes           | Clostridia         | Lachnospirale<br>s                 | Lachnospiracea<br>e    | NA              |
| raher-<br>2020-<br>dss_<br>ASV3<br>97 | Bact<br>eria | Firmicu<br>tes           | Clostridia         | Lachnospirale<br>s                 | Lachnospiracea<br>e    | Tuzzerella      |
| raher-<br>2020-<br>dss_<br>ASV3<br>98 | Bact<br>eria | Bacteroi<br>dota         | Bacteroidi<br>a    | Bacteroidales                      | Muribaculacea<br>e     | NA              |
| raher-<br>2020-<br>dss_<br>ASV3<br>99 | Bact<br>eria | Firmicu<br>tes           | Clostridia         | Clostridia_va<br>dinBB60_grou<br>p | NA                     | NA              |

|                                       |              |                   |                      |                                    |                      |                             |
|---------------------------------------|--------------|-------------------|----------------------|------------------------------------|----------------------|-----------------------------|
| raber-<br>2020-<br>dss_<br>ASV4<br>00 | Bact<br>eria | Firmicu<br>tes    | Clostridia           | Clostridia_vad<br>inBB60_grou<br>p | NA                   | NA                          |
| raber-<br>2020-<br>dss_<br>ASV4<br>01 | Bact<br>eria | Firmicu<br>tes    | Clostridia           | Lachnospirale<br>s                 | Lachnospiracea<br>e  | Lachnospiraceae<br>_UCG-001 |
| raber-<br>2020-<br>dss_<br>ASV4<br>02 | Bact<br>eria | Firmicu<br>tes    | Clostridia           | Lachnospirale<br>s                 | Lachnospiracea<br>e  | NA                          |
| raber-<br>2020-<br>dss_<br>ASV4<br>03 | Bact<br>eria | Firmicu<br>tes    | Clostridia           | Oscillospirale<br>s                | Ruminococcace<br>ae  | NA                          |
| raber-<br>2020-<br>dss_<br>ASV4<br>04 | Bact<br>eria | Firmicu<br>tes    | Clostridia           | Lachnospirale<br>s                 | Lachnospiracea<br>e  | GCA-900066575               |
| raber-<br>2020-<br>dss_<br>ASV4<br>05 | Bact<br>eria | Firmicu<br>tes    | Clostridia           | Oscillospirale<br>s                | Oscillospiracea<br>e | UCG-005                     |
| raber-<br>2020-<br>dss_<br>ASV4<br>06 | Bact<br>eria | Cyanob<br>acteria | Vampirivi<br>brionia | Gastranaerop<br>hilales            | NA                   | NA                          |
| raber-<br>2020-<br>dss_<br>ASV4<br>07 | Bact<br>eria | Firmicu<br>tes    | Clostridia           | Lachnospirale<br>s                 | Lachnospiracea<br>e  | Acetatifactor               |

|                                       |              |                    |                             |                        |                     |                                   |
|---------------------------------------|--------------|--------------------|-----------------------------|------------------------|---------------------|-----------------------------------|
| raber-<br>2020-<br>dss_<br>ASV4<br>08 | Bact<br>eria | Firmicu<br>tes     | Clostridia                  | Oscillospirale<br>s    | Ruminococcace<br>ae | NA                                |
| raber-<br>2020-<br>dss_<br>ASV4<br>09 | Bact<br>eria | Firmicu<br>tes     | Clostridia                  | Lachnospirale<br>s     | Lachnospiraceae     | Lachnospiraceae<br>_NK4A136_group |
| raber-<br>2020-<br>dss_<br>ASV4<br>10 | Bact<br>eria | Firmicu<br>tes     | Clostridia                  | Clostridia_UC<br>G-014 | NA                  | NA                                |
| raber-<br>2020-<br>dss_<br>ASV4<br>11 | Bact<br>eria | Firmicu<br>tes     | Clostridia                  | Lachnospirale<br>s     | Lachnospiraceae     | Lachnoclostridium                 |
| raber-<br>2020-<br>dss_<br>ASV4<br>12 | Bact<br>eria | Bacteroi<br>dota   | Bacteroidi<br>a             | Bacteroidales          | Muribaculaceae      | NA                                |
| raber-<br>2020-<br>dss_<br>ASV4<br>13 | Bact<br>eria | Firmicu<br>tes     | Clostridia                  | Oscillospirale<br>s    | Ruminococcace<br>ae | Negativibacillus                  |
| raber-<br>2020-<br>dss_<br>ASV4<br>14 | Bact<br>eria | Proteob<br>acteria | Gammapr<br>oteobacteri<br>a | Burkholderial<br>es    | Sutterellaceae      | Parasutterella                    |
| raber-<br>2020-<br>dss_<br>ASV4<br>16 | Bact<br>eria | Firmicu<br>tes     | Clostridia                  | Clostridia_UC<br>G-014 | NA                  | NA                                |

|                                       |              |                          |                    |                        |                     |                                  |
|---------------------------------------|--------------|--------------------------|--------------------|------------------------|---------------------|----------------------------------|
| raher-<br>2020-<br>dss_<br>ASV4<br>17 | Bact<br>eria | Firmicu<br>tes           | Clostridia         | Lachnospirale<br>s     | Lachnospiracea<br>e | NA                               |
| raher-<br>2020-<br>dss_<br>ASV4<br>18 | Bact<br>eria | Actinob<br>acteriot<br>a | Coriobacte<br>riia | Coriobacterial<br>es   | Eggerthellacea<br>e | Enterorhabdus                    |
| raher-<br>2020-<br>dss_<br>ASV4<br>19 | Bact<br>eria | Firmicu<br>tes           | Clostridia         | Clostridia_UC<br>G-014 | NA                  | NA                               |
| raher-<br>2020-<br>dss_<br>ASV4<br>20 | Bact<br>eria | Firmicu<br>tes           | NA                 | NA                     | NA                  | NA                               |
| raher-<br>2020-<br>dss_<br>ASV4<br>21 | Bact<br>eria | Firmicu<br>tes           | Clostridia         | Lachnospirale<br>s     | Lachnospiracea<br>e | Lachnospiraceae<br>_UCG-001      |
| raher-<br>2020-<br>dss_<br>ASV4<br>25 | Bact<br>eria | Bacteroi<br>dota         | Bacteroidi<br>a    | Bacteroidales          | Muribaculacea<br>e  | NA                               |
| raher-<br>2020-<br>dss_<br>ASV4<br>26 | Bact<br>eria | Firmicu<br>tes           | Clostridia         | Lachnospirale<br>s     | Lachnospiracea<br>e | Lachnospiraceae<br>_FCS020_group |
| raher-<br>2020-<br>dss_<br>ASV4<br>27 | Bact<br>eria | Firmicu<br>tes           | Clostridia         | Clostridia_UC<br>G-014 | NA                  | NA                               |

|                                       |              |                          |                    |                        |                     |                       |
|---------------------------------------|--------------|--------------------------|--------------------|------------------------|---------------------|-----------------------|
| raber-<br>2020-<br>dss_<br>ASV4<br>29 | Bact<br>eria | Bacteroi<br>dota         | Bacteroidi<br>a    | Bacteroidales          | Muribaculacea<br>e  | NA                    |
| raber-<br>2020-<br>dss_<br>ASV4<br>30 | Bact<br>eria | Bacteroi<br>dota         | Bacteroidi<br>a    | Bacteroidales          | Muribaculacea<br>e  | NA                    |
| raber-<br>2020-<br>dss_<br>ASV4<br>31 | Bact<br>eria | Firmicu<br>tes           | Clostridia         | Clostridia_UC<br>G-014 | NA                  | NA                    |
| raber-<br>2020-<br>dss_<br>ASV4<br>32 | Bact<br>eria | Bacteroi<br>dota         | Bacteroidi<br>a    | Bacteroidales          | Muribaculacea<br>e  | NA                    |
| raber-<br>2020-<br>dss_<br>ASV4<br>33 | Bact<br>eria | Actinob<br>acteriot<br>a | Coriobacte<br>riia | Coriobacterial<br>es   | Eggerthellacea<br>e | DNF00809              |
| raber-<br>2020-<br>dss_<br>ASV4<br>34 | Bact<br>eria | Bacteroi<br>dota         | Bacteroidi<br>a    | Bacteroidales          | Muribaculacea<br>e  | NA                    |
| raber-<br>2020-<br>dss_<br>ASV4<br>35 | Bact<br>eria | Firmicu<br>tes           | Clostridia         | Lachnospirale<br>s     | Lachnospiracea<br>e | Lachnoclostridiu<br>m |
| raber-<br>2020-<br>dss_<br>ASV4<br>36 | Bact<br>eria | Actinob<br>acteriot<br>a | Coriobacte<br>riia | Coriobacterial<br>es   | Eggerthellacea<br>e | DNF00809              |

|                                       |              |                |            |                                         |                  |                              |
|---------------------------------------|--------------|----------------|------------|-----------------------------------------|------------------|------------------------------|
| raher-<br>2020-<br>dss_<br>ASV4<br>37 | Bact<br>eria | Firmicu<br>tes | Clostridia | Peptostreptococcales-<br>Tissierellales | Anaerovoracaceae | Family_XIII_AD<br>3011_group |
| raher-<br>2020-<br>dss_<br>ASV4<br>38 | Bact<br>eria | Firmicu<br>tes | Clostridia | Clostridia_vadinBB60_group              | NA               | NA                           |
| raher-<br>2020-<br>dss_<br>ASV4<br>39 | Bact<br>eria | Firmicu<br>tes | Clostridia | Lachnospirales                          | Lachnospiraceae  | NA                           |
| raher-<br>2020-<br>dss_<br>ASV4<br>40 | Bact<br>eria | Firmicu<br>tes | Clostridia | Lachnospirales                          | Lachnospiraceae  | Acetatifactor                |
| raher-<br>2020-<br>dss_<br>ASV4<br>41 | Bact<br>eria | Firmicu<br>tes | Clostridia | Clostridia_vadinBB60_group              | NA               | NA                           |
| raher-<br>2020-<br>dss_<br>ASV4<br>42 | Bact<br>eria | Firmicu<br>tes | Clostridia | Lachnospirales                          | Lachnospiraceae  | NA                           |
| raher-<br>2020-<br>dss_<br>ASV4<br>43 | Bact<br>eria | Firmicu<br>tes | Clostridia | Lachnospirales                          | Lachnospiraceae  | NA                           |
| raher-<br>2020-<br>dss_<br>ASV4<br>44 | Bact<br>eria | Firmicu<br>tes | Clostridia | Oscillospirales                         | Ruminococcaceae  | Incertae_Sedis               |

|                                       |              |                  |                 |                     |                     |                                       |
|---------------------------------------|--------------|------------------|-----------------|---------------------|---------------------|---------------------------------------|
| raber-<br>2020-<br>dss_<br>ASV4<br>45 | Bact<br>eria | Firmicu<br>tes   | Clostridia      | Oscillospirale<br>s | Ruminococcace<br>ae | NA                                    |
| raber-<br>2020-<br>dss_<br>ASV4<br>46 | Bact<br>eria | Firmicu<br>tes   | Clostridia      | Lachnospirale<br>s  | Lachnospiracea<br>e | NA                                    |
| raber-<br>2020-<br>dss_<br>ASV4<br>47 | Bact<br>eria | Firmicu<br>tes   | Clostridia      | Lachnospirale<br>s  | Lachnospiracea<br>e | Lachnospiraceae<br>_NK4A136_grou<br>p |
| raber-<br>2020-<br>dss_<br>ASV4<br>48 | Bact<br>eria | Bacteroi<br>dota | Bacteroidi<br>a | Bacteroidales       | Muribaculacea<br>e  | NA                                    |
| raber-<br>2020-<br>dss_<br>ASV4<br>49 | Bact<br>eria | Firmicu<br>tes   | Clostridia      | Lachnospirale<br>s  | Lachnospiracea<br>e | NA                                    |
| raber-<br>2020-<br>dss_<br>ASV4<br>51 | Bact<br>eria | Bacteroi<br>dota | Bacteroidi<br>a | Bacteroidales       | Muribaculacea<br>e  | NA                                    |
| raber-<br>2020-<br>dss_<br>ASV4<br>52 | Bact<br>eria | Firmicu<br>tes   | Clostridia      | Lachnospirale<br>s  | Lachnospiracea<br>e | NA                                    |
| raber-<br>2020-<br>dss_<br>ASV4<br>53 | Bact<br>eria | Bacteroi<br>dota | Bacteroidi<br>a | Bacteroidales       | Muribaculacea<br>e  | NA                                    |

|                                       |              |                |             |                                         |                  |                         |
|---------------------------------------|--------------|----------------|-------------|-----------------------------------------|------------------|-------------------------|
| raher-<br>2020-<br>dss_<br>ASV4<br>54 | Bact<br>eria | Firmicu<br>tes | Clostridia  | Peptostreptococcales-<br>Tissierellales | Anaerovoracaceae | Family_XIII_UC<br>G-001 |
| raher-<br>2020-<br>dss_<br>ASV4<br>55 | Bact<br>eria | Firmicu<br>tes | Clostridia  | Lachnospirales                          | Lachnospiraceae  | Lachnoclostridium       |
| raher-<br>2020-<br>dss_<br>ASV4<br>56 | Bact<br>eria | Firmicu<br>tes | Clostridia  | Lachnospirales                          | Lachnospiraceae  | Acetatifactor           |
| raher-<br>2020-<br>dss_<br>ASV4<br>57 | Bact<br>eria | Bacteroidota   | Bacteroidia | Bacteroidales                           | Muribaculaceae   | NA                      |
| raher-<br>2020-<br>dss_<br>ASV4<br>58 | Bact<br>eria | Firmicu<br>tes | Clostridia  | Clostridia_vadinBB60_group              | NA               | NA                      |
| raher-<br>2020-<br>dss_<br>ASV4<br>59 | Bact<br>eria | Firmicu<br>tes | Clostridia  | Oscillospirales                         | Ruminococcaceae  | NA                      |
| raher-<br>2020-<br>dss_<br>ASV4<br>60 | Bact<br>eria | Firmicu<br>tes | Clostridia  | Lachnospirales                          | Lachnospiraceae  | Lachnospiraceae_UCG-006 |
| raher-<br>2020-<br>dss_<br>ASV4<br>61 | Bact<br>eria | Bacteroidota   | Bacteroidia | Bacteroidales                           | Muribaculaceae   | NA                      |

|                                       |              |                          |                      |                        |                         |               |
|---------------------------------------|--------------|--------------------------|----------------------|------------------------|-------------------------|---------------|
| raher-<br>2020-<br>dss_<br>ASV4<br>62 | Bact<br>eria | Firmicu<br>tes           | Clostridia           | Clostridia_UC<br>G-014 | NA                      | NA            |
| raher-<br>2020-<br>dss_<br>ASV4<br>63 | Bact<br>eria | Firmicu<br>tes           | Bacilli              | RF39                   | NA                      | NA            |
| raher-<br>2020-<br>dss_<br>ASV4<br>64 | Bact<br>eria | Firmicu<br>tes           | Clostridia           | Oscillospirale<br>s    | Oscillospiracea<br>e    | NA            |
| raher-<br>2020-<br>dss_<br>ASV4<br>65 | Bact<br>eria | Firmicu<br>tes           | Clostridia           | Oscillospirale<br>s    | Ruminococcace<br>ae     | NA            |
| raher-<br>2020-<br>dss_<br>ASV4<br>66 | Bact<br>eria | Firmicu<br>tes           | Clostridia           | Lachnospirale<br>s     | Lachnospiracea<br>e     | Tuzzerella    |
| raher-<br>2020-<br>dss_<br>ASV4<br>67 | Bact<br>eria | Desulfo<br>bacterot<br>a | Desulfovib<br>rionia | Desulfovibrio<br>nales | Desulfovibrion<br>aceae | Desulfovibrio |
| raher-<br>2020-<br>dss_<br>ASV4<br>68 | Bact<br>eria | Firmicu<br>tes           | Clostridia           | Oscillospirale<br>s    | Oscillospiracea<br>e    | Oscillibacter |
| raher-<br>2020-<br>dss_<br>ASV4<br>69 | Bact<br>eria | Actinob<br>acteriot<br>a | Coriobacte<br>riia   | Coriobacterial<br>es   | Eggerthellacea<br>e     | NA            |

|                                       |              |                          |                    |                        |                      |                |
|---------------------------------------|--------------|--------------------------|--------------------|------------------------|----------------------|----------------|
| raber-<br>2020-<br>dss_<br>ASV4<br>70 | Bact<br>eria | Firmicu<br>tes           | Clostridia         | Oscillospirale<br>s    | Ruminococcace<br>ae  | Incertae_Sedis |
| raber-<br>2020-<br>dss_<br>ASV4<br>71 | Bact<br>eria | Actinob<br>acteriot<br>a | Coriobacte<br>riia | Coriobacterial<br>es   | Eggerthellacea<br>e  | NA             |
| raber-<br>2020-<br>dss_<br>ASV4<br>72 | Bact<br>eria | Firmicu<br>tes           | Clostridia         | Clostridia_UC<br>G-014 | NA                   | NA             |
| raber-<br>2020-<br>dss_<br>ASV4<br>73 | Bact<br>eria | Firmicu<br>tes           | Clostridia         | Lachnospirale<br>s     | Lachnospiracea<br>e  | NA             |
| raber-<br>2020-<br>dss_<br>ASV4<br>74 | Bact<br>eria | Firmicu<br>tes           | Clostridia         | Oscillospirale<br>s    | Oscillospiracea<br>e | UCG-003        |
| raber-<br>2020-<br>dss_<br>ASV4<br>75 | Bact<br>eria | Firmicu<br>tes           | Clostridia         | Peptococcales          | Peptococcaceae       | NA             |
| raber-<br>2020-<br>dss_<br>ASV4<br>78 | Bact<br>eria | Firmicu<br>tes           | Clostridia         | Clostridia_UC<br>G-014 | NA                   | NA             |
| raber-<br>2020-<br>dss_<br>ASV4<br>80 | Bact<br>eria | Firmicu<br>tes           | Clostridia         | Oscillospirale<br>s    | Oscillospiracea<br>e | NA             |

|                                       |              |                  |                 |                     |                     |                                  |
|---------------------------------------|--------------|------------------|-----------------|---------------------|---------------------|----------------------------------|
| raber-<br>2020-<br>dss_<br>ASV4<br>81 | Bact<br>eria | Firmicu<br>tes   | Clostridia      | Oscillospirale<br>s | Ruminococcace<br>ae | Harryflintia                     |
| raber-<br>2020-<br>dss_<br>ASV4<br>82 | Bact<br>eria | Firmicu<br>tes   | Clostridia      | Lachnospirale<br>s  | Lachnospiraceae     | NA                               |
| raber-<br>2020-<br>dss_<br>ASV4<br>83 | Bact<br>eria | Firmicu<br>tes   | Clostridia      | Oscillospirale<br>s | Oscillospiraceae    | Colidextribacter                 |
| raber-<br>2020-<br>dss_<br>ASV4<br>84 | Bact<br>eria | Firmicu<br>tes   | Clostridia      | Oscillospirale<br>s | Oscillospiraceae    | NA                               |
| raber-<br>2020-<br>dss_<br>ASV4<br>85 | Bact<br>eria | Firmicu<br>tes   | Clostridia      | Lachnospirale<br>s  | Lachnospiraceae     | Lachnospiraceae<br>_FCS020_group |
| raber-<br>2020-<br>dss_<br>ASV4<br>88 | Bact<br>eria | Bacteroi<br>dota | Bacteroidi<br>a | Bacteroidales       | Muribaculaceae      | NA                               |
| raber-<br>2020-<br>dss_<br>ASV4<br>89 | Bact<br>eria | Firmicu<br>tes   | Clostridia      | Lachnospirale<br>s  | Lachnospiraceae     | Roseburia                        |
| raber-<br>2020-<br>dss_<br>ASV4<br>90 | Bact<br>eria | Firmicu<br>tes   | Clostridia      | Oscillospirale<br>s | Oscillospiraceae    | Intestinimonas                   |

|                                       |              |                |            |                        |                      |                             |
|---------------------------------------|--------------|----------------|------------|------------------------|----------------------|-----------------------------|
| raher-<br>2020-<br>dss_<br>ASV4<br>91 | Bact<br>eria | Firmicu<br>tes | Clostridia | Oscillospirale<br>s    | Oscillospiracea<br>e | NA                          |
| raher-<br>2020-<br>dss_<br>ASV4<br>92 | Bact<br>eria | Firmicu<br>tes | Clostridia | Lachnospirale<br>s     | Lachnospiracea<br>e  | NA                          |
| raher-<br>2020-<br>dss_<br>ASV4<br>93 | Bact<br>eria | Firmicu<br>tes | Clostridia | Lachnospirale<br>s     | Lachnospiracea<br>e  | NA                          |
| raher-<br>2020-<br>dss_<br>ASV4<br>95 | Bact<br>eria | Firmicu<br>tes | Clostridia | Clostridia_UC<br>G-014 | NA                   | NA                          |
| raher-<br>2020-<br>dss_<br>ASV4<br>96 | Bact<br>eria | Firmicu<br>tes | Clostridia | Lachnospirale<br>s     | Lachnospiracea<br>e  | Lachnospiraceae<br>_UCG-010 |
| raher-<br>2020-<br>dss_<br>ASV4<br>97 | Bact<br>eria | Firmicu<br>tes | Clostridia | Lachnospirale<br>s     | Lachnospiracea<br>e  | NA                          |
| raher-<br>2020-<br>dss_<br>ASV4<br>98 | Bact<br>eria | Firmicu<br>tes | Clostridia | Lachnospirale<br>s     | Lachnospiracea<br>e  | Roseburia                   |
| raher-<br>2020-<br>dss_<br>ASV5<br>00 | Bact<br>eria | Firmicu<br>tes | Clostridia | Lachnospirale<br>s     | Lachnospiracea<br>e  | Lachnoclostridiu<br>m       |

|                                       |              |                |            |                                         |                      |                       |
|---------------------------------------|--------------|----------------|------------|-----------------------------------------|----------------------|-----------------------|
| raber-<br>2020-<br>dss_<br>ASV5<br>01 | Bact<br>eria | Firmicu<br>tes | Clostridia | Lachnospirale<br>s                      | Lachnospiracea<br>e  | Lachnoclostridiu<br>m |
| raber-<br>2020-<br>dss_<br>ASV5<br>03 | Bact<br>eria | Firmicu<br>tes | Clostridia | Oscillospirale<br>s                     | Oscillospiracea<br>e | NA                    |
| raber-<br>2020-<br>dss_<br>ASV5<br>04 | Bact<br>eria | Firmicu<br>tes | Clostridia | Lachnospirale<br>s                      | Lachnospiracea<br>e  | NA                    |
| raber-<br>2020-<br>dss_<br>ASV5<br>05 | Bact<br>eria | Firmicu<br>tes | Clostridia | Lachnospirale<br>s                      | Lachnospiracea<br>e  | NA                    |
| raber-<br>2020-<br>dss_<br>ASV5<br>06 | Bact<br>eria | Firmicu<br>tes | Clostridia | Peptostreptococcales-<br>Tissierellales | Anaerovoracaceae     | NA                    |
| raber-<br>2020-<br>dss_<br>ASV5<br>07 | Bact<br>eria | Firmicu<br>tes | Bacilli    | Lactobacillales                         | Streptococcaceae     | Streptococcus         |
| raber-<br>2020-<br>dss_<br>ASV5<br>09 | Bact<br>eria | Firmicu<br>tes | Bacilli    | Erysipelotrichales                      | Erysipelotrichaceae  | NA                    |
| raber-<br>2020-<br>dss_<br>ASV5<br>10 | Bact<br>eria | Firmicu<br>tes | Clostridia | Lachnospirale<br>s                      | Lachnospiracea<br>e  | Roseburia             |

|                       |          |                  |                |                            |                                      |                              |
|-----------------------|----------|------------------|----------------|----------------------------|--------------------------------------|------------------------------|
| raber-2020-dss_ASV511 | Bacteria | Firmicutes       | Clostridia     | Lachnospirales             | Lachnospiraceae                      | NA                           |
| raber-2020-dss_ASV513 | Bacteria | Firmicutes       | Clostridia     | Clostridia_vadinBB60_group | NA                                   | NA                           |
| raber-2020-dss_ASV515 | Bacteria | Firmicutes       | Clostridia     | Monoglobales               | Monoglobaceae                        | Monoglobus                   |
| raber-2020-dss_ASV516 | Bacteria | Firmicutes       | Clostridia     | Oscillospirales            | Oscillospiraceae                     | Oscillospira                 |
| raber-2020-dss_ASV518 | Bacteria | Firmicutes       | Clostridia     | Oscillospirales            | Ruminococcaceae                      | NA                           |
| raber-2020-dss_ASV520 | Bacteria | Firmicutes       | Clostridia     | Oscillospirales            | Oscillospiraceae                     | UCG-003                      |
| raber-2020-dss_ASV523 | Bacteria | Firmicutes       | Clostridia     | Lachnospirales             | Lachnospiraceae                      | Lachnospiraceae_FCS020_group |
| raber-2020-dss_ASV524 | Bacteria | Actinobacteriota | Coriobacteriia | Coriobacteriales           | Coriobacteriales_Incertae_Sedimentis | NA                           |

|                                       |              |                          |                    |                      |                      |                            |
|---------------------------------------|--------------|--------------------------|--------------------|----------------------|----------------------|----------------------------|
| raber-<br>2020-<br>dss_<br>ASV5<br>25 | Bact<br>eria | Firmicu<br>tes           | Clostridia         | Lachnospirale<br>s   | Lachnospiracea<br>e  | NA                         |
| raber-<br>2020-<br>dss_<br>ASV5<br>27 | Bact<br>eria | Bacteroi<br>dota         | Bacteroidi<br>a    | Bacteroidales        | Muribaculacea<br>e   | NA                         |
| raber-<br>2020-<br>dss_<br>ASV5<br>28 | Bact<br>eria | Firmicu<br>tes           | Clostridia         | Lachnospirale<br>s   | Lachnospiracea<br>e  | NA                         |
| raber-<br>2020-<br>dss_<br>ASV5<br>29 | Bact<br>eria | Bacteroi<br>dota         | Bacteroidi<br>a    | Bacteroidales        | Muribaculacea<br>e   | NA                         |
| raber-<br>2020-<br>dss_<br>ASV5<br>30 | Bact<br>eria | Firmicu<br>tes           | Bacilli            | Lactobacillale<br>s  | Leuconostocac<br>eae | Weissella                  |
| raber-<br>2020-<br>dss_<br>ASV5<br>31 | Bact<br>eria | Actinob<br>acteriot<br>a | Coriobacte<br>riia | Coriobacterial<br>es | Atopobiaceae         | Olsenella                  |
| raber-<br>2020-<br>dss_<br>ASV5<br>33 | Bact<br>eria | Firmicu<br>tes           | Clostridia         | Oscillospirale<br>s  | Oscillospiracea<br>e | Oscillibacter              |
| raber-<br>2020-<br>dss_<br>ASV5<br>36 | Bact<br>eria | Firmicu<br>tes           | Clostridia         | Clostridiales        | Clostridiaceae       | Candidatus_Art<br>hromitus |

|                                       |              |                          |                    |                      |                     |                       |
|---------------------------------------|--------------|--------------------------|--------------------|----------------------|---------------------|-----------------------|
| raber-<br>2020-<br>dss_<br>ASV5<br>37 | Bact<br>eria | Firmicu<br>tes           | Bacilli            | RF39                 | NA                  | NA                    |
| raber-<br>2020-<br>dss_<br>ASV5<br>39 | Bact<br>eria | Firmicu<br>tes           | Clostridia         | Lachnospirale<br>s   | Lachnospiracea<br>e | Lachnoclostridiu<br>m |
| raber-<br>2020-<br>dss_<br>ASV5<br>43 | Bact<br>eria | Firmicu<br>tes           | Clostridia         | Lachnospirale<br>s   | Lachnospiracea<br>e | NA                    |
| raber-<br>2020-<br>dss_<br>ASV5<br>44 | Bact<br>eria | Actinob<br>acteriot<br>a | Coriobacte<br>riia | Coriobacterial<br>es | Eggerthellacea<br>e | Enterorhabdus         |
| raber-<br>2020-<br>dss_<br>ASV5<br>47 | Bact<br>eria | Actinob<br>acteriot<br>a | Coriobacte<br>riia | Coriobacterial<br>es | Eggerthellacea<br>e | NA                    |
| raber-<br>2020-<br>dss_<br>ASV5<br>49 | Bact<br>eria | Firmicu<br>tes           | Clostridia         | Lachnospirale<br>s   | Lachnospiracea<br>e | Acetatifactor         |
| raber-<br>2020-<br>dss_<br>ASV5<br>50 | Bact<br>eria | Bacteroi<br>dota         | Bacteroidi<br>a    | Bacteroidales        | Muribaculacea<br>e  | NA                    |
| raber-<br>2020-<br>dss_<br>ASV5<br>54 | Bact<br>eria | Firmicu<br>tes           | Clostridia         | Oscillospirale<br>s  | Ruminococcace<br>ae | NA                    |

|                                       |              |                  |                 |                     |                      |                       |
|---------------------------------------|--------------|------------------|-----------------|---------------------|----------------------|-----------------------|
| raber-<br>2020-<br>dss_<br>ASV5<br>61 | Bact<br>eria | Firmicu<br>tes   | Clostridia      | Lachnospirale<br>s  | Lachnospiracea<br>e  | NA                    |
| raber-<br>2020-<br>dss_<br>ASV5<br>62 | Bact<br>eria | Firmicu<br>tes   | Clostridia      | Oscillospirale<br>s | Oscillospiracea<br>e | Colidextribacter      |
| raber-<br>2020-<br>dss_<br>ASV5<br>63 | Bact<br>eria | Firmicu<br>tes   | Clostridia      | Oscillospirale<br>s | Ruminococcace<br>ae  | Incertae_Sedis        |
| raber-<br>2020-<br>dss_<br>ASV5<br>64 | Bact<br>eria | Firmicu<br>tes   | Clostridia      | Lachnospirale<br>s  | Lachnospiracea<br>e  | Lachnoclostridiu<br>m |
| raber-<br>2020-<br>dss_<br>ASV5<br>66 | Bact<br>eria | Bacteroi<br>dota | Bacteroidi<br>a | Bacteroidales       | Muribaculacea<br>e   | NA                    |
| raber-<br>2020-<br>dss_<br>ASV5<br>69 | Bact<br>eria | Bacteroi<br>dota | Bacteroidi<br>a | Bacteroidales       | Muribaculacea<br>e   | NA                    |
| raber-<br>2020-<br>dss_<br>ASV5<br>70 | Bact<br>eria | Bacteroi<br>dota | Bacteroidi<br>a | Bacteroidales       | Muribaculacea<br>e   | NA                    |
| raber-<br>2020-<br>dss_<br>ASV5<br>73 | Bact<br>eria | Firmicu<br>tes   | Clostridia      | Oscillospirale<br>s | Ruminococcace<br>ae  | NA                    |

|                                       |              |                      |                             |                                    |                         |                                   |
|---------------------------------------|--------------|----------------------|-----------------------------|------------------------------------|-------------------------|-----------------------------------|
| raber-<br>2020-<br>dss_<br>ASV5<br>74 | Bact<br>eria | Proteob<br>acteria   | Gammapr<br>oteobacteri<br>a | Burkholderial<br>es                | Sutterellaceae          | Parasutterella                    |
| raber-<br>2020-<br>dss_<br>ASV5<br>83 | Bact<br>eria | Actinob<br>acteriota | Coriobacte<br>riia          | Coriobacterial<br>es               | Eggerthellacea<br>e     | DNF00809                          |
| raber-<br>2020-<br>dss_<br>ASV5<br>84 | Bact<br>eria | Firmicu<br>tes       | Clostridia                  | Lachnospirale<br>s                 | Lachnospiracea<br>e     | Lachnospiraceae<br>_UCG-004       |
| raber-<br>2020-<br>dss_<br>ASV5<br>86 | Bact<br>eria | Firmicu<br>tes       | Clostridia                  | Lachnospirale<br>s                 | Lachnospiracea<br>e     | Tuzzerella                        |
| raber-<br>2020-<br>dss_<br>ASV5<br>87 | Bact<br>eria | Firmicu<br>tes       | Clostridia                  | Christensenell<br>ales             | Christensenella<br>ceae | Christensenellac<br>eae_R-7_group |
| raber-<br>2020-<br>dss_<br>ASV5<br>88 | Bact<br>eria | Firmicu<br>tes       | Clostridia                  | Clostridia_va<br>dinBB60_grou<br>p | NA                      | NA                                |
| raber-<br>2020-<br>dss_<br>ASV5<br>89 | Bact<br>eria | Patescib<br>acteria  | Saccharim<br>onadia         | Saccharimona<br>dales              | Saccharimonad<br>aceae  | Candidatus_Sacc<br>harimonas      |
| raber-<br>2020-<br>dss_<br>ASV5<br>91 | Bact<br>eria | Bacteroi<br>dota     | Bacteroidi<br>a             | Bacteroidales                      | Muribaculacea<br>e      | NA                                |

|                                       |              |                          |                             |                        |                               |               |
|---------------------------------------|--------------|--------------------------|-----------------------------|------------------------|-------------------------------|---------------|
| raber-<br>2020-<br>dss_<br>ASV5<br>92 | Bact<br>eria | Firmicu<br>tes           | Clostridia                  | Lachnospirale<br>s     | Lachnospiracea<br>e           | NA            |
| raber-<br>2020-<br>dss_<br>ASV5<br>93 | Bact<br>eria | Firmicu<br>tes           | Clostridia                  | Lachnospirale<br>s     | Lachnospiracea<br>e           | Acetatifactor |
| raber-<br>2020-<br>dss_<br>ASV5<br>94 | Bact<br>eria | Proteob<br>acteria       | Gammapr<br>oteobacteri<br>a | Pseudomona<br>dales    | Pseudomonada<br>ceae          | Pseudomonas   |
| raber-<br>2020-<br>dss_<br>ASV5<br>95 | Bact<br>eria | Firmicu<br>tes           | Clostridia                  | Lachnospirale<br>s     | Lachnospiracea<br>e           | NA            |
| raber-<br>2020-<br>dss_<br>ASV5<br>97 | Bact<br>eria | Actinob<br>acteriot<br>a | Coriobacte<br>riia          | Coriobacterial<br>es   | Eggerthellacea<br>e           | Enterorhabdus |
| raber-<br>2020-<br>dss_<br>ASV6<br>01 | Bact<br>eria | Firmicu<br>tes           | Clostridia                  | NA                     | NA                            | NA            |
| raber-<br>2020-<br>dss_<br>ASV6<br>02 | Bact<br>eria | Firmicu<br>tes           | Bacilli                     | Erysipelotrich<br>ales | Erysipelatoclos<br>tridiaceae | NA            |
| raber-<br>2020-<br>dss_<br>ASV6<br>05 | Bact<br>eria | Firmicu<br>tes           | Clostridia                  | Lachnospirale<br>s     | Lachnospiracea<br>e           | NA            |

|                                       |              |                          |                    |                        |                         |               |
|---------------------------------------|--------------|--------------------------|--------------------|------------------------|-------------------------|---------------|
| raber-<br>2020-<br>dss_<br>ASV6<br>09 | Bact<br>eria | Actinob<br>acteriot<br>a | Coriobacte<br>riia | Coriobacterial<br>es   | Eggerthellacea<br>e     | DNF00809      |
| raber-<br>2020-<br>dss_<br>ASV6<br>10 | Bact<br>eria | Firmicu<br>tes           | Clostridia         | Oscillospirale<br>s    | Oscillospiracea<br>e    | NA            |
| raber-<br>2020-<br>dss_<br>ASV6<br>13 | Bact<br>eria | Actinob<br>acteriot<br>a | Coriobacte<br>riia | Coriobacterial<br>es   | Eggerthellacea<br>e     | DNF00809      |
| raber-<br>2020-<br>dss_<br>ASV6<br>22 | Bact<br>eria | Firmicu<br>tes           | Bacilli            | Lactobacillale<br>s    | Lactobacillacea<br>e    | Lactobacillus |
| raber-<br>2020-<br>dss_<br>ASV6<br>25 | Bact<br>eria | Firmicu<br>tes           | Clostridia         | Oscillospirale<br>s    | Ruminococcace<br>ae     | NA            |
| raber-<br>2020-<br>dss_<br>ASV6<br>26 | Bact<br>eria | Firmicu<br>tes           | Clostridia         | Lachnospirale<br>s     | Lachnospiracea<br>e     | NA            |
| raber-<br>2020-<br>dss_<br>ASV6<br>27 | Bact<br>eria | Firmicu<br>tes           | Bacilli            | Erysipelotrich<br>ales | Erysipelotricha<br>ceae | Turicibacter  |
| raber-<br>2020-<br>dss_<br>ASV6<br>32 | Bact<br>eria | Bacteroi<br>dota         | Bacteroidi<br>a    | Bacteroidales          | Muribaculacea<br>e      | NA            |

|                                       |              |                  |                 |                     |                      |                  |
|---------------------------------------|--------------|------------------|-----------------|---------------------|----------------------|------------------|
| raber-<br>2020-<br>dss_<br>ASV6<br>33 | Bact<br>eria | Firmicu<br>tes   | Clostridia      | Lachnospirale<br>s  | Lachnospiracea<br>e  | NA               |
| raber-<br>2020-<br>dss_<br>ASV6<br>36 | Bact<br>eria | Bacteroi<br>dota | Bacteroidi<br>a | Bacteroidales       | Rikenellaceae        | Alistipes        |
| raber-<br>2020-<br>dss_<br>ASV6<br>37 | Bact<br>eria | Firmicu<br>tes   | Clostridia      | Lachnospirale<br>s  | Lachnospiracea<br>e  | NA               |
| raber-<br>2020-<br>dss_<br>ASV6<br>38 | Bact<br>eria | Firmicu<br>tes   | Clostridia      | Oscillospirale<br>s | Oscillospiracea<br>e | NA               |
| raber-<br>2020-<br>dss_<br>ASV6<br>40 | Bact<br>eria | Firmicu<br>tes   | Clostridia      | Lachnospirale<br>s  | Lachnospiracea<br>e  | NA               |
| raber-<br>2020-<br>dss_<br>ASV6<br>41 | Bact<br>eria | Bacteroi<br>dota | Bacteroidi<br>a | Bacteroidales       | Muribaculacea<br>e   | NA               |
| raber-<br>2020-<br>dss_<br>ASV6<br>42 | Bact<br>eria | Bacteroi<br>dota | Bacteroidi<br>a | Bacteroidales       | Muribaculacea<br>e   | CAG-873          |
| raber-<br>2020-<br>dss_<br>ASV6<br>43 | Bact<br>eria | Firmicu<br>tes   | Clostridia      | Oscillospirale<br>s | Oscillospiracea<br>e | Colidextribacter |

|                                       |              |                     |                         |                       |                        |                              |
|---------------------------------------|--------------|---------------------|-------------------------|-----------------------|------------------------|------------------------------|
| raber-<br>2020-<br>dss_<br>ASV6<br>44 | Bact<br>eria | Proteob<br>acteria  | Alphaprot<br>eobacteria | Rickettsiales         | Mitochondria           | NA                           |
| raber-<br>2020-<br>dss_<br>ASV6<br>46 | Bact<br>eria | Firmicu<br>tes      | Clostridia              | Oscillospirale<br>s   | Ruminococcace<br>ae    | Incertae_Sedis               |
| raber-<br>2020-<br>dss_<br>ASV6<br>50 | Bact<br>eria | Patescib<br>acteria | Saccharim<br>onadia     | Saccharimona<br>dales | Saccharimonad<br>aceae | Candidatus_Sacc<br>harimonas |
| raber-<br>2020-<br>dss_<br>ASV6<br>51 | Bact<br>eria | Firmicu<br>tes      | Clostridia              | Lachnospirale<br>s    | Lachnospiracea<br>e    | NA                           |
| raber-<br>2020-<br>dss_<br>ASV6<br>52 | Bact<br>eria | Bacteroi<br>dota    | Bacteroidi<br>a         | Bacteroidales         | NA                     | NA                           |
| raber-<br>2020-<br>dss_<br>ASV6<br>53 | Bact<br>eria | Bacteroi<br>dota    | Bacteroidi<br>a         | Bacteroidales         | Muribaculacea<br>e     | NA                           |
| raber-<br>2020-<br>dss_<br>ASV6<br>58 | Bact<br>eria | Firmicu<br>tes      | Clostridia              | Lachnospirale<br>s    | Lachnospiracea<br>e    | NA                           |
| raber-<br>2020-<br>dss_<br>ASV6<br>59 | Bact<br>eria | Firmicu<br>tes      | Clostridia              | Lachnospirale<br>s    | Lachnospiracea<br>e    | NA                           |

|                                       |              |                  |                 |                     |                      |               |
|---------------------------------------|--------------|------------------|-----------------|---------------------|----------------------|---------------|
| raber-<br>2020-<br>dss_<br>ASV6<br>61 | Bact<br>eria | Firmicu<br>tes   | NA              | NA                  | NA                   | NA            |
| raber-<br>2020-<br>dss_<br>ASV6<br>62 | Bact<br>eria | Firmicu<br>tes   | Clostridia      | Lachnospirale<br>s  | Lachnospiracea<br>e  | NA            |
| raber-<br>2020-<br>dss_<br>ASV6<br>64 | Bact<br>eria | Firmicu<br>tes   | Bacilli         | Lactobacillale<br>s | Lactobacillacea<br>e | Lactobacillus |
| raber-<br>2020-<br>dss_<br>ASV6<br>65 | Bact<br>eria | Firmicu<br>tes   | Clostridia      | Oscillospirale<br>s | Oscillospiracea<br>e | NA            |
| raber-<br>2020-<br>dss_<br>ASV6<br>66 | Bact<br>eria | Firmicu<br>tes   | Clostridia      | Lachnospirale<br>s  | Lachnospiracea<br>e  | ASF356        |
| raber-<br>2020-<br>dss_<br>ASV6<br>67 | Bact<br>eria | Bacteroi<br>dota | Bacteroidi<br>a | Bacteroidales       | NA                   | NA            |
| raber-<br>2020-<br>dss_<br>ASV6<br>68 | Bact<br>eria | Bacteroi<br>dota | Bacteroidi<br>a | Bacteroidales       | NA                   | NA            |
| raber-<br>2020-<br>dss_<br>ASV6<br>71 | Bact<br>eria | Firmicu<br>tes   | Clostridia      | Oscillospirale<br>s | Oscillospiracea<br>e | NA            |

|                                       |              |                  |                 |                                         |                         |         |
|---------------------------------------|--------------|------------------|-----------------|-----------------------------------------|-------------------------|---------|
| raber-<br>2020-<br>dss_<br>ASV6<br>72 | Bact<br>eria | Firmicu<br>tes   | Clostridia      | Christensenell<br>ales                  | Christensenella<br>ceae | NA      |
| raber-<br>2020-<br>dss_<br>ASV6<br>73 | Bact<br>eria | Bacteroi<br>dota | Bacteroidi<br>a | Bacteroidales                           | NA                      | NA      |
| raber-<br>2020-<br>dss_<br>ASV6<br>74 | Bact<br>eria | Bacteroi<br>dota | Bacteroidi<br>a | Bacteroidales                           | Muribaculacea<br>e      | NA      |
| raber-<br>2020-<br>dss_<br>ASV6<br>75 | Bact<br>eria | Firmicu<br>tes   | Clostridia      | Peptostreptococcales-<br>Tissierellales | Anaerovoracaceae        | NA      |
| raber-<br>2020-<br>dss_<br>ASV6<br>76 | Bact<br>eria | Firmicu<br>tes   | Clostridia      | Oscillospirales                         | Ruminococcaceae         | Phoceae |
| raber-<br>2020-<br>dss_<br>ASV6<br>77 | Bact<br>eria | Firmicu<br>tes   | Clostridia      | Lachnospirales                          | Lachnospiraceae         | ASF356  |
| raber-<br>2020-<br>dss_<br>ASV6<br>78 | Bact<br>eria | Firmicu<br>tes   | Clostridia      | NA                                      | NA                      | NA      |
| raber-<br>2020-<br>dss_<br>ASV6<br>79 | Bact<br>eria | Bacteroi<br>dota | Bacteroidi<br>a | Bacteroidales                           | NA                      | NA      |

|                  |      |          |               |             |                    |                     |                    |
|------------------|------|----------|---------------|-------------|--------------------|---------------------|--------------------|
| raiber-2020-dss_ | ASV6 | Bacteria | Bacteroidetes | Bacteroidia | Bacteroidales      | Marinifilaceae      | Odoribacter        |
| raiber-2020-dss_ | ASV6 | Bacteria | Firmicutes    | Bacilli     | Erysipelotrichales | Erysipelotrichaceae | Faecalibaculum     |
| raiber-2020-dss_ | ASV6 | Bacteria | Bacteroidetes | Bacteroidia | Bacteroidales      | Muribaculaceae      | NA                 |
| raiber-2020-dss_ | ASV6 | Bacteria | Firmicutes    | Clostridia  | Oscillospirales    | Butyricicoccaceae   | NA                 |
| raiber-2020-dss_ | ASV6 | Bacteria | Firmicutes    | Bacilli     | Acholeplasmales    | Acholeplasmataceae  | Anaeroplasmataceae |
| raiber-2020-dss_ | ASV6 | Bacteria | Firmicutes    | Clostridia  | Lachnospirales     | Lachnospiraceae     | NA                 |
| raiber-2020-dss_ | ASV6 | Bacteria | Firmicutes    | Clostridia  | Lachnospirales     | Lachnospiraceae     | NA                 |
| raiber-2020-dss_ | ASV6 | Bacteria | Firmicutes    | Clostridia  | Lachnospirales     | Lachnospiraceae     | NA                 |

|                                       |              |                     |                     |                       |                        |                              |
|---------------------------------------|--------------|---------------------|---------------------|-----------------------|------------------------|------------------------------|
| raber-<br>2020-<br>dss_<br>ASV6<br>90 | Bact<br>eria | Firmicu<br>tes      | Bacilli             | Lactobacillale<br>s   | Leuconostocac<br>eae   | Leuconostoc                  |
| raber-<br>2020-<br>dss_<br>ASV6<br>94 | Bact<br>eria | Firmicu<br>tes      | Clostridia          | Oscillospirale<br>s   | Oscillospiracea<br>e   | Sporobacter                  |
| raber-<br>2020-<br>dss_<br>ASV6<br>95 | Bact<br>eria | Firmicu<br>tes      | Clostridia          | Lachnospirale<br>s    | Lachnospiracea<br>e    | NA                           |
| raber-<br>2020-<br>dss_<br>ASV6<br>96 | Bact<br>eria | Firmicu<br>tes      | Clostridia          | Lachnospirale<br>s    | Lachnospiracea<br>e    | NA                           |
| raber-<br>2020-<br>dss_<br>ASV6<br>97 | Bact<br>eria | Firmicu<br>tes      | Clostridia          | NA                    | NA                     | NA                           |
| raber-<br>2020-<br>dss_<br>ASV6<br>98 | Bact<br>eria | Firmicu<br>tes      | Clostridia          | Oscillospirale<br>s   | Ruminococcace<br>ae    | NA                           |
| raber-<br>2020-<br>dss_<br>ASV7<br>00 | Bact<br>eria | Firmicu<br>tes      | Clostridia          | Oscillospirale<br>s   | Oscillospiracea<br>e   | NA                           |
| raber-<br>2020-<br>dss_<br>ASV7<br>01 | Bact<br>eria | Patescib<br>acteria | Saccharim<br>onadia | Saccharimona<br>dales | Saccharimonad<br>aceae | Candidatus_Sacc<br>harimonas |

|                                       |              |                          |                    |                     |                      |                       |
|---------------------------------------|--------------|--------------------------|--------------------|---------------------|----------------------|-----------------------|
| raher-<br>2020-<br>dss_<br>ASV7<br>02 | Bact<br>eria | Firmicu<br>tes           | Clostridia         | Lachnospirale<br>s  | Lachnospiracea<br>e  | NA                    |
| raher-<br>2020-<br>dss_<br>ASV7<br>03 | Bact<br>eria | Firmicu<br>tes           | Clostridia         | Lachnospirale<br>s  | Lachnospiracea<br>e  | NA                    |
| raher-<br>2020-<br>dss_<br>ASV7<br>04 | Bact<br>eria | Bacteroi<br>dota         | Bacteroidi<br>a    | Bacteroidales       | NA                   | NA                    |
| raher-<br>2020-<br>dss_<br>ASV7<br>06 | Bact<br>eria | Firmicu<br>tes           | Clostridia         | Oscillospirale<br>s | Oscillospiracea<br>e | NA                    |
| raher-<br>2020-<br>dss_<br>ASV7<br>07 | Bact<br>eria | Actinob<br>acteriot<br>a | Actinobact<br>eria | Micrococcales       | Micrococcaceae       | Pseudarthrobact<br>er |
| raher-<br>2020-<br>dss_<br>ASV7<br>10 | Bact<br>eria | Firmicu<br>tes           | Clostridia         | Lachnospirale<br>s  | Lachnospiracea<br>e  | NA                    |
| raher-<br>2020-<br>dss_<br>ASV7<br>14 | Bact<br>eria | Firmicu<br>tes           | Clostridia         | Oscillospirale<br>s | Oscillospiracea<br>e | Sporobacter           |
| raher-<br>2020-<br>dss_<br>ASV7<br>15 | Bact<br>eria | Firmicu<br>tes           | Clostridia         | Lachnospirale<br>s  | Lachnospiracea<br>e  | NA                    |

|                                       |              |                     |                     |                       |                        |                              |
|---------------------------------------|--------------|---------------------|---------------------|-----------------------|------------------------|------------------------------|
| raber-<br>2020-<br>dss_<br>ASV7<br>16 | Bact<br>eria | Firmicu<br>tes      | Clostridia          | Lachnospirale<br>s    | Lachnospiracea<br>e    | NA                           |
| raber-<br>2020-<br>dss_<br>ASV7<br>17 | Bact<br>eria | Patescib<br>acteria | Saccharim<br>onadia | Saccharimona<br>dales | Saccharimonad<br>aceae | Candidatus_Sacc<br>harimonas |
| raber-<br>2020-<br>dss_<br>ASV7<br>18 | Bact<br>eria | Firmicu<br>tes      | Clostridia          | Oscillospirale<br>s   | Oscillospiracea<br>e   | Oscillibacter                |
| raber-<br>2020-<br>dss_<br>ASV7<br>21 | Bact<br>eria | Firmicu<br>tes      | Clostridia          | Lachnospirale<br>s    | Lachnospiracea<br>e    | A2                           |
| raber-<br>2020-<br>dss_<br>ASV7<br>23 | Bact<br>eria | Bacteroi<br>dota    | Bacteroidi<br>a     | Bacteroidales         | Muribaculacea<br>e     | NA                           |
| raber-<br>2020-<br>dss_<br>ASV7<br>30 | Bact<br>eria | Firmicu<br>tes      | Bacilli             | NA                    | NA                     | NA                           |
| raber-<br>2020-<br>dss_<br>ASV7<br>31 | Bact<br>eria | Firmicu<br>tes      | Clostridia          | NA                    | NA                     | NA                           |
| raber-<br>2020-<br>dss_<br>ASV7<br>32 | Bact<br>eria | Firmicu<br>tes      | Bacilli             | NA                    | NA                     | NA                           |

|                                        |              |                          |                    |                                             |                       |                |
|----------------------------------------|--------------|--------------------------|--------------------|---------------------------------------------|-----------------------|----------------|
| raiber-<br>2020-<br>dss_<br>ASV7<br>33 | Bact<br>eria | Bacteroi<br>dota         | Bacteroidi<br>a    | Bacteroidales                               | Muribaculacea<br>e    | Muribaculum    |
| raiber-<br>2020-<br>dss_<br>ASV7<br>34 | Bact<br>eria | Firmicu<br>tes           | Clostridia         | Lachnospirale<br>s                          | Lachnospiracea<br>e   | NA             |
| raiber-<br>2020-<br>dss_<br>ASV7<br>35 | Bact<br>eria | Firmicu<br>tes           | Clostridia         | Oscillospirale<br>s                         | Oscillospiracea<br>e  | Sporobacter    |
| raiber-<br>2020-<br>dss_<br>ASV7<br>36 | Bact<br>eria | Actinob<br>acteriot<br>a | Actinobact<br>eria | Micrococcales                               | Microbacteriac<br>eae | Curtobacterium |
| raiber-<br>2020-<br>dss_<br>ASV7<br>37 | Bact<br>eria | Firmicu<br>tes           | Clostridia         | Oscillospirale<br>s                         | Ruminococcace<br>ae   | NA             |
| raiber-<br>2020-<br>dss_<br>ASV7<br>42 | Bact<br>eria | Firmicu<br>tes           | Clostridia         | Peptostreptoc<br>occales-<br>Tissierellales | Anaerovoracac<br>eae  | NA             |
| raiber-<br>2020-<br>dss_<br>ASV7<br>43 | Bact<br>eria | Bacteroi<br>dota         | Bacteroidi<br>a    | Bacteroidales                               | NA                    | NA             |
| raiber-<br>2020-<br>dss_<br>ASV7<br>44 | Bact<br>eria | Firmicu<br>tes           | Clostridia         | NA                                          | NA                    | NA             |

|                                       |              |                |            |                     |                     |                                   |
|---------------------------------------|--------------|----------------|------------|---------------------|---------------------|-----------------------------------|
| raber-<br>2020-<br>dss_<br>ASV7<br>45 | Bact<br>eria | Firmicu<br>tes | Clostridia | Oscillospirale<br>s | Ruminococcace<br>ae | NA                                |
| raber-<br>2020-<br>dss_<br>ASV7<br>46 | Bact<br>eria | Firmicu<br>tes | Clostridia | Lachnospirale<br>s  | Lachnospiraceae     | NA                                |
| raber-<br>2020-<br>dss_<br>ASV7<br>47 | Bact<br>eria | Firmicu<br>tes | Clostridia | Lachnospirale<br>s  | Lachnospiraceae     | NA                                |
| raber-<br>2020-<br>dss_<br>ASV7<br>50 | Bact<br>eria | Firmicu<br>tes | Clostridia | Lachnospirale<br>s  | Lachnospiraceae     | NA                                |
| raber-<br>2020-<br>dss_<br>ASV7<br>67 | Bact<br>eria | Firmicu<br>tes | Clostridia | Lachnospirale<br>s  | Lachnospiraceae     | NA                                |
| raber-<br>2020-<br>dss_<br>ASV7<br>69 | Bact<br>eria | Firmicu<br>tes | Clostridia | Lachnospirale<br>s  | Lachnospiraceae     | NA                                |
| raber-<br>2020-<br>dss_<br>ASV7<br>70 | Bact<br>eria | Firmicu<br>tes | Bacilli    | RF39                | NA                  | NA                                |
| raber-<br>2020-<br>dss_<br>ASV7<br>71 | Bact<br>eria | Firmicu<br>tes | Clostridia | Lachnospirale<br>s  | Lachnospiraceae     | Lachnospiraceae<br>_NK4A136_group |

|                                       |              |                  |                 |                     |                      |             |
|---------------------------------------|--------------|------------------|-----------------|---------------------|----------------------|-------------|
| raber-<br>2020-<br>dss_<br>ASV7<br>72 | Bact<br>eria | Firmicu<br>tes   | Clostridia      | Oscillospirale<br>s | Ruminococcace<br>ae  | NA          |
| raber-<br>2020-<br>dss_<br>ASV7<br>73 | Bact<br>eria | NA               | NA              | NA                  | NA                   | NA          |
| raber-<br>2020-<br>dss_<br>ASV7<br>74 | Bact<br>eria | Bacteroi<br>dota | Bacteroidi<br>a | NA                  | NA                   | NA          |
| raber-<br>2020-<br>dss_<br>ASV7<br>75 | Bact<br>eria | Firmicu<br>tes   | NA              | NA                  | NA                   | NA          |
| raber-<br>2020-<br>dss_<br>ASV7<br>76 | Bact<br>eria | Firmicu<br>tes   | Clostridia      | Lachnospirale<br>s  | Lachnospiracea<br>e  | NA          |
| raber-<br>2020-<br>dss_<br>ASV7<br>78 | Bact<br>eria | Firmicu<br>tes   | Clostridia      | Oscillospirale<br>s | Ruminococcace<br>ae  | NA          |
| raber-<br>2020-<br>dss_<br>ASV7<br>79 | Bact<br>eria | Firmicu<br>tes   | Clostridia      | Oscillospirale<br>s | Oscillospiracea<br>e | NA          |
| raber-<br>2020-<br>dss_<br>ASV7<br>80 | Bact<br>eria | Bacteroi<br>dota | Bacteroidi<br>a | Bacteroidales       | Bacteroidaceae       | Bacteroides |

|                                        |              |                |            |                      |                       |               |
|----------------------------------------|--------------|----------------|------------|----------------------|-----------------------|---------------|
| raiber-<br>2020-<br>dss_<br>ASV7<br>81 | Bact<br>eria | Firmicu<br>tes | Clostridia | Oscillospirale<br>s  | NA                    | NA            |
| raiber-<br>2020-<br>dss_<br>ASV7<br>82 | Bact<br>eria | Firmicu<br>tes | Clostridia | Lachnospirale<br>s   | Lachnospiracea<br>e   | NA            |
| raiber-<br>2020-<br>dss_<br>ASV7<br>83 | Bact<br>eria | Firmicu<br>tes | Clostridia | Lachnospirale<br>s   | Lachnospiracea<br>e   | NA            |
| raiber-<br>2020-<br>dss_<br>ASV7<br>84 | Bact<br>eria | Firmicu<br>tes | Clostridia | Lachnospirale<br>s   | Lachnospiracea<br>e   | Acetatifactor |
| raiber-<br>2020-<br>dss_<br>ASV7<br>85 | Bact<br>eria | Firmicu<br>tes | Clostridia | Lachnospirale<br>s   | Lachnospiracea<br>e   | NA            |
| raiber-<br>2020-<br>dss_<br>ASV7<br>86 | Bact<br>eria | Firmicu<br>tes | Bacilli    | Staphylococca<br>les | Staphylococcac<br>eae | NA            |
| raiber-<br>2020-<br>dss_<br>ASV7<br>87 | Bact<br>eria | Firmicu<br>tes | Clostridia | Lachnospirale<br>s   | Lachnospiracea<br>e   | NA            |
| raiber-<br>2020-<br>dss_<br>ASV7<br>88 | Bact<br>eria | Firmicu<br>tes | Clostridia | NA                   | NA                    | NA            |

|                                       |              |                  |                 |                     |                      |                          |
|---------------------------------------|--------------|------------------|-----------------|---------------------|----------------------|--------------------------|
| raher-<br>2020-<br>dss_<br>ASV7<br>90 | Bact<br>eria | Firmicu<br>tes   | Clostridia      | Lachnospirale<br>s  | Lachnospiracea<br>e  | NA                       |
| raher-<br>2020-<br>dss_<br>ASV7<br>91 | Bact<br>eria | Firmicu<br>tes   | Clostridia      | Lachnospirale<br>s  | Lachnospiracea<br>e  | NA                       |
| raher-<br>2020-<br>dss_<br>ASV7<br>92 | Bact<br>eria | Bacteroi<br>dota | Bacteroidi<br>a | Bacteroidales       | Muribaculacea<br>e   | CAG-873                  |
| raher-<br>2020-<br>dss_<br>ASV7<br>93 | Bact<br>eria | Firmicu<br>tes   | Clostridia      | Oscillospirale<br>s | Oscillospiracea<br>e | Pseudoflavonifra<br>ctor |
| raher-<br>2020-<br>dss_<br>ASV7<br>94 | Bact<br>eria | Bacteroi<br>dota | Bacteroidi<br>a | Bacteroidales       | Muribaculacea<br>e   | NA                       |
| raher-<br>2020-<br>dss_<br>ASV7<br>96 | Bact<br>eria | Firmicu<br>tes   | Clostridia      | Oscillospirale<br>s | NA                   | NA                       |
| raher-<br>2020-<br>dss_<br>ASV8<br>24 | Bact<br>eria | Firmicu<br>tes   | Clostridia      | Lachnospirale<br>s  | Lachnospiracea<br>e  | NA                       |
| raher-<br>2020-<br>dss_<br>ASV8<br>25 | Bact<br>eria | Firmicu<br>tes   | Clostridia      | Lachnospirale<br>s  | Lachnospiracea<br>e  | NA                       |

|                                       |              |                  |                 |                     |                     |             |
|---------------------------------------|--------------|------------------|-----------------|---------------------|---------------------|-------------|
| raber-<br>2020-<br>dss_<br>ASV8<br>26 | Bact<br>eria | Bacteroi<br>dota | Bacteroidi<br>a | Bacteroidales       | Muribaculacea<br>e  | CAG-873     |
| raber-<br>2020-<br>dss_<br>ASV8<br>27 | Bact<br>eria | Firmicu<br>tes   | Clostridia      | Oscillospirale<br>s | Ruminococcace<br>ae | NA          |
| raber-<br>2020-<br>dss_<br>ASV8<br>28 | Bact<br>eria | Firmicu<br>tes   | Clostridia      | Lachnospirale<br>s  | Lachnospiracea<br>e | NA          |
| raber-<br>2020-<br>dss_<br>ASV8<br>29 | Bact<br>eria | Bacteroi<br>dota | Bacteroidi<br>a | Bacteroidales       | Muribaculacea<br>e  | NA          |
| raber-<br>2020-<br>dss_<br>ASV8<br>30 | Bact<br>eria | Bacteroi<br>dota | Bacteroidi<br>a | Bacteroidales       | Muribaculacea<br>e  | NA          |
| raber-<br>2020-<br>dss_<br>ASV8<br>31 | Bact<br>eria | Bacteroi<br>dota | Bacteroidi<br>a | Bacteroidales       | Bacteroidaceae      | Bacteroides |
| raber-<br>2020-<br>dss_<br>ASV8<br>33 | Bact<br>eria | Bacteroi<br>dota | Bacteroidi<br>a | Bacteroidales       | Rikenellaceae       | NA          |
| raber-<br>2020-<br>dss_<br>ASV8<br>34 | Bact<br>eria | Bacteroi<br>dota | Bacteroidi<br>a | Bacteroidales       | Muribaculacea<br>e  | NA          |

|                                       |              |                  |                 |                     |                     |    |
|---------------------------------------|--------------|------------------|-----------------|---------------------|---------------------|----|
| raber-<br>2020-<br>dss_<br>ASV8<br>35 | Bact<br>eria | Firmicu<br>tes   | Clostridia      | Lachnospirale<br>s  | Lachnospiracea<br>e | NA |
| raber-<br>2020-<br>dss_<br>ASV8<br>36 | Bact<br>eria | Firmicu<br>tes   | Clostridia      | Oscillospirale<br>s | NA                  | NA |
| raber-<br>2020-<br>dss_<br>ASV8<br>38 | Bact<br>eria | Firmicu<br>tes   | NA              | NA                  | NA                  | NA |
| raber-<br>2020-<br>dss_<br>ASV8<br>39 | Bact<br>eria | Firmicu<br>tes   | Clostridia      | Lachnospirale<br>s  | Lachnospiracea<br>e | NA |
| raber-<br>2020-<br>dss_<br>ASV8<br>40 | Bact<br>eria | Bacteroi<br>dota | Bacteroidi<br>a | Bacteroidales       | NA                  | NA |
| raber-<br>2020-<br>dss_<br>ASV8<br>41 | Bact<br>eria | Firmicu<br>tes   | NA              | NA                  | NA                  | NA |
| raber-<br>2020-<br>dss_<br>ASV8<br>42 | Bact<br>eria | Firmicu<br>tes   | Clostridia      | Lachnospirale<br>s  | Lachnospiracea<br>e | NA |
| raber-<br>2020-<br>dss_<br>ASV8<br>43 | Bact<br>eria | Bacteroi<br>dota | Bacteroidi<br>a | Bacteroidales       | Muribaculacea<br>e  | NA |

|                                       |              |                     |                     |                       |                        |                              |
|---------------------------------------|--------------|---------------------|---------------------|-----------------------|------------------------|------------------------------|
| raber-<br>2020-<br>dss_<br>ASV8<br>44 | Bact<br>eria | Bacteroi<br>dota    | Bacteroidi<br>a     | Bacteroidales         | Muribaculacea<br>e     | NA                           |
| raber-<br>2020-<br>dss_<br>ASV8<br>45 | Bact<br>eria | Firmicu<br>tes      | Clostridia          | NA                    | NA                     | NA                           |
| raber-<br>2020-<br>dss_<br>ASV8<br>46 | Bact<br>eria | Patescib<br>acteria | Saccharim<br>onadia | Saccharimona<br>dales | Saccharimonad<br>aceae | Candidatus_Sacc<br>harimonas |
| raber-<br>2020-<br>dss_<br>ASV8<br>47 | Bact<br>eria | Firmicu<br>tes      | Clostridia          | Lachnospirale<br>s    | Lachnospiracea<br>e    | NA                           |
| raber-<br>2020-<br>dss_<br>ASV8<br>50 | Bact<br>eria | Bacteroi<br>dota    | Bacteroidi<br>a     | Bacteroidales         | NA                     | NA                           |
| raber-<br>2020-<br>dss_<br>ASV8<br>52 | Bact<br>eria | Firmicu<br>tes      | NA                  | NA                    | NA                     | NA                           |
| raber-<br>2020-<br>dss_<br>ASV8<br>53 | Bact<br>eria | Firmicu<br>tes      | Clostridia          | Lachnospirale<br>s    | Lachnospiracea<br>e    | NA                           |
| raber-<br>2020-<br>dss_<br>ASV8<br>54 | Bact<br>eria | Firmicu<br>tes      | Clostridia          | Oscillospirale<br>s   | Oscillospiracea<br>e   | Pseudoflavonifra<br>ctor     |

raber-  
 2020-  
 dss\_

ASV8 Bact Firmicu Lachnospirale Lachnospiraceae  
 55 eria tes Clostridia s e NA

raber-  
 2020-  
 dss\_

ASV8 Bact Firmicu Oscillospirale Butyricicoccace  
 59 eria tes Clostridia s ae UCG-008

raber-  
 2020-  
 dss\_

ASV9 Bact Firmicu Lachnospirale Lachnospiraceae  
 05 eria tes Clostridia s e NA

**Table S4.** DSS metadata.

| Sample ID | SID | Sex | Geno | DSS | Timepoint |         | OF1. TotD | OF1. Weeist | NO1. SOT | SO. total.d | NO2. DO.T  | NO2. D     | NO2. Y.Maze | TotY.Maze  | P.Delta  | FallScore | ReachScore | Grip.Strength | Grip.Wk3.weight | Grip.Ratio      | FST.S   | Context | FC. Context | FC. Context |
|-----------|-----|-----|------|-----|-----------|---------|-----------|-------------|----------|-------------|------------|------------|-------------|------------|----------|-----------|------------|---------------|-----------------|-----------------|---------|---------|-------------|-------------|
|           |     |     |      |     | int.k     | move.m  | CentDur   | tDistcm     | Move.ys  | all.3.dat   | DistMov    | O.Pct      | ODO.D       | al.Arm.Ent | ct.Spont |           |            |               |                 |                 | rotorod | corin   | ContTotPct  | CuedTone    |
| 594wk4-1  | 1   | M   | WT   | 0%  | 4         | 878.29  | 0         | 2016.81     | 460.674  | 1502.48     | 32.3272322 | 0.3534554  | 19          | 52.9411765 | 10.7     | 9         | 0          | 126           | 27.6            | 4.5652233331739 | 3333    | 69.22   | 41.17       |             |
| 594wk4-2  | 2   | M   | Het  | 0%  | 4         | 1471.63 | 8.40838   | 2631.61     | 1069.604 | 1908.24     | 64.5885105 | 0.29177021 | 28          | 53.8461539 | -14.1    | 6         | 0          | 67.2          | 25.2            | 2.6666116666667 | 3333    | 50.57   | 8.24        |             |
| 594wk4-3  | 3   | M   | Het  | 3%  | 4         | 1164.23 | 12.4791   | 1669.15     | 747.047  | 1448.41     | 40.0000245 | 0.1999995  | 15          | 46.1538462 | 1.7      | 9         | 0          | 112.5         | 30.6            | 3.6764333337059 | 3333    | 84.73   | 13.81       |             |
| 594wk4-4  | 4   | F   | WT   | 3%  | 4         | 2070.77 | 15.9492   | 2822.02     | 912.59   | 2013.67     | 36.5759712 | 0.2684806  | 36          | 52.9411765 | -16.6    | 9         | 0          | 92            | 19              | 4.84210526      | 0       | 74.19   | 1.56        |             |
| 594wk4-5  | 5   | F   | WT   | 0%  | 4         | 2105.13 | 9.00898   | 2567.65     | 510.08   | 2575.4      | 68.4101133 | 0.36820227 | 20          | 33.3333333 | 29       | 6         | 3          | 97.2          | 24.1            | 4.0331666669502 | 6667    | 48.94   | 1.44        |             |
| 594wk4-6  | 6   | F   | Het  | 3%  | 4         | 1480.37 | 0         | 2230.5      | 516.074  | 1954.17     | 19.0476318 | 0.6190474  | 15          | 23.0769231 | 0.6      | 5         | 0          | 128.2         | 22.3            | 5.7488833337892 | 3333    | 39.88   | 14.57       |             |
| 594wk4-7  | 7   | F   | Het  | 0%  | 4         | 1458.68 | 17.017    | 2088.3      | 206.4    | 1173.14     | 72.493564  | 0.44987128 | 13          | 54.5454546 | 13.3     | 8         | 0          | 83.5          | 22.6            | 3.6946366669027 | 6667    | 85.04   | 73.52       |             |
| 594wk4-8  | 8   | M   | WT   | 3%  | 4         | 1233.78 | 34.1674   | 1404.63     | 552.637  | 1359.87     | 73.8128399 | 0.4762568  | 18          | 87.5       | 5.4      | 8         | 0          | 100.5         | 25.9            | 3.8803366660888 | 6667    | 54.86   | 25.2        |             |
| 594wk4-9  | 9   | M   | WT   | 0%  | 4         | 1281.82 | 10.0767   | 1491.28     | 458.501  | 1488.18     | NA         | NA         | 20          | 44.4444444 | 22       | 9         | 0          | 107.5         | 25.6            | 4.1992233331875 | 3333    | 77.24   | 26.57       |             |
| 594wk4-10 | 10  | M   | Het  | 3%  | 4         | 1244.53 | 18.0847   | 1674.94     | 918.556  | 837.252     | NA         | NA         | 14          | 58.3333333 | 15.8     | 5         | 0          | 120.5         | 24.4            | 4.9385116662459 | 6667    | 81.24   | 10.7        |             |
| 594wk4-11 | 11  | M   | Het  | 0%  | 4         | 1986.11 | 16.6166   | 3515.36     | 720.97   | 2420.52     | 81.2976789 | 0.62595358 | 22          | 55         | 1.8      | 4         | 1          | 117           | 21.7            | 5.39170507      | 15      | 36.81   | 33.28       |             |
| 594wk4-12 | 12  | F   | WT   | 3%  | 4         | 2124.24 | 22.6226   | 2199.28     | 1334.148 | 2747.43     | 58.6583194 | 0.17316639 | 25          | 39.1304348 | 6.1      | 7         | 0          | 96            | 23.5            | 4.08510638      | 25      | 70.24   | 35.91       |             |
| 594wk4-13 | 13  | F   | WT   | 0%  | 4         | 1311.7  | 0         | 1821.92     | 386.581  | 1468.84     | 83.1695231 | 0.66339046 | 15          | 23.0769231 | 13.3     | 5         | 2          | 80.7          | 20.9            | 3.8612166664402 | 6667    | 72.99   | 33.61       |             |
| 594wk4-14 | 14  | F   | WT   | 3%  | 4         | 1306.84 | 10.6106   | 2511.31     | 675.51   | 1326.12     | 37.7358527 | 0.2452829  | 14          | 25         | 20.3     | 5         | 1          | 96            | 23.2            | 4.1379433333103 | 3333    | 73.1    | 8.17        |             |
| 594wk4-15 | 15  | F   | Het  | 0%  | 4         | 3276.91 | 28.2949   | 3714.74     | 1809.34  | 3488.76     | 47.6662018 | 0.046676   | 21          | 52.631579  | 6.8      | 9         | 2          | 108           | 24.2            | 4.4628233330992 | 3333    | 40.74   | 9.43        |             |
| 594wk4-16 | 16  | M   | Het  | 0%  | 4         | 1704.38 | 25.759    | 3321.37     | 943.376  | 2647.62     | 55.9386973 | 0.11877395 | 17          | 73.3333333 | 17       | 4         | 3          | 150.5         | 27.8            | 5.4136283336907 | 3333    | 81.17   | 20.96       |             |
| 594wk4-17 | 17  | M   | Het  | 3%  | 4         | 812.729 | 10.8775   | 1311.05     | 350.516  | 1353.81     | 60.0733111 | 0.20146622 | 13          | 54.5454546 | 5.1      | 6         | 0          | 125.5         | 28.8            | 4.35763889      | 30      | 73.43   | 52.28       |             |
| 594wk4-18 | 18  | F   | Het  | 3%  | 4         | 1690.28 | 14.014    | 3854.12     | 971.119  | 4180.94     | 51.7112047 | 0.0342241  | 28          | 34.6153846 | -1.1     | 7         | 0          | 126           | 24.8            | 5.08064516      | 40      | 75.77   | 24.3        |             |
| 594wk4-19 | 19  | F   | Het  | 0%  | 4         | 1228.12 | 12.0787   | 2314.5      | 304.877  | 1360.32     | 61.5176506 | 0.23035301 | 14          | 58.3333333 | -4.3     | 8         | 0          | 107.5         | 25.5            | 4.21568628      | 5       | 64.33   | 36.83       |             |

|                       |    |   |     |    |   |         |             |         |          |         |                |                    |    |                |       |    |   |       |      |                           |       |       |       |
|-----------------------|----|---|-----|----|---|---------|-------------|---------|----------|---------|----------------|--------------------|----|----------------|-------|----|---|-------|------|---------------------------|-------|-------|-------|
| 594wk<br>4-20         | 20 | F | WT  | 0% | 4 | 1137.5  | 7.0069<br>8 | 1794.9  | 485.61   | 1641.04 | 69.2307<br>536 | 0.3846<br>1507     | 24 | 40.90909<br>09 | 8.3   | 6  | 1 | 96    | 21.2 | 4.5283<br>0189            | 50    | 82.76 | 4.19  |
| 594wk<br>4-21         | 21 | F | Het | 3% | 4 | 3016.85 | 19.486<br>1 | 7341.13 | 302.82   | 6048.21 | 58.1594<br>325 | 0.1631<br>8865     | 28 | 38.46153<br>85 | 14.6  | 8  | 1 | 87.5  | 26.6 | 3.289438.333<br>7368 3333 | 75.03 | 17.91 |       |
| 594wk<br>4-22         | 22 | F | Het | 0% | 4 | 753.011 | 2.002       | 1020.49 | 57.179   | 945.582 | NA             | NA                 | 9  | 71.42857<br>14 | 41.8  | 8  | 0 | 90.5  | 23.1 | 3.917713.333<br>4892 3333 | 72.36 | 53.22 |       |
| 594wk<br>4-23         | 23 | M | Het | 3% | 4 | 1049.81 | 6.8735<br>2 | 1794.37 | 431.151  | 1414.57 | 57.6922<br>634 | 0.1538<br>4527     | 19 | 35.29411<br>77 | -5.1  | 0  | 0 | 71.2  | 24.9 | 2.8594<br>3775            | 25    | 53.96 | 8.2   |
| 594wk<br>4-24         | 24 | M | Het | 0% | 4 | 1912.33 | 12.078<br>7 | 4622.27 | -79.02   | 4044.95 | 62.8016<br>405 | 0.2560<br>3281     | 29 | 55.55555<br>56 | 50.3  | 8  | 0 | 106.2 | 23.3 | 4.5579<br>3991            | 20    | 22.49 | 1.89  |
| 594wk<br>4-25         | 25 | M | Het | 3% | 4 | 1392.18 | 32.165<br>4 | 2064.98 | 656.569  | 1702.97 | 68.6411<br>337 | 0.3728<br>2267     | 24 | 50             | 28.1  | 7  | 0 | 83    | 25.3 | 3.280661.666<br>3241 6667 | 69.02 | 29.44 |       |
| 594wk<br>4-26-<br>kit | 26 | M | WT  | 3% | 4 | 1338.4  | 4.8715<br>2 | 1871.72 | 724.87   | 1820.9  | 34.0886<br>012 | -<br>0.3182<br>28  | 17 | 40             | -12.7 | 9  | 1 | 97.2  | 23   | 4.2260<br>8696            | 50    | 88.04 | 47.96 |
| 594wk<br>4-27         | 27 | M | WT  | 0% | 4 | 1590.97 | 41.174<br>4 | 2445.91 | 769.717  | 1044.56 | 34.9206<br>33  | -<br>0.3015<br>873 | 21 | 47.36842<br>11 | 2.3   | 8  | 2 | 114.2 | 24.1 | 4.7385<br>8921            | 50    | 49.38 | 23.22 |
| 594wk<br>4-28         | 28 | M | Het | 0% | 4 | 882.171 | 45.378<br>6 | 2069.9  | -194.899 | 2149.78 | 72.3756<br>325 | 0.4475<br>1265     | 18 | 62.5           | 26.6  | 10 | 0 | 110.2 | 23.4 | 4.7094<br>0171            | 0     | 55.72 | 43.3  |
| 594wk<br>4-29         | 29 | F | Het | 0% | 4 | 1734.62 | 14.748      | 1869.07 | 794.353  | 1773.11 | 39.2618<br>413 | 0.2147<br>632      | 29 | 70.37037<br>04 | 23.7  | 10 | 0 | 99    | 21.5 | 4.604638.333<br>5116 3333 | 46.12 | 3.19  |       |
| 594wk<br>4-30         | 30 | F | Het | 3% | 4 | 1547.28 | 12.145<br>4 | 1636.1  | 906.188  | 1316.04 | 68.5714<br>775 | 0.3714<br>2955     | 14 | 58.33333<br>33 | -0.5  | 6  | 1 | 82    | 21   | 3.9047<br>6191            | 10    | 54.27 | 31.11 |
